# Supplementary material
Source: MDPI journal article supplement (https://www.mdpi.com/2079-3197/9/11/121)
Supplement: s1 [file s1]

### Figure S 1

#### Viable geometries of trimeric acylphloroglucinols in which no phenol OH is replaced by other functions.

The geometries are characterized by three factors: the mutual orientations of the monomers, the conformer type of each monomer, and the mutual orientations of the methylene bridges.

It is selected to orient the first monomer on the left with the acyl chain ‘up’, i.e., the ring is oriented in such a way that the acyl group is in its upper part. The orientations of the next monomers are identified as ‘up’ or ‘down’ with reference to the orientation of the first monomer.

The conformer types of the individual monomers are determined by the position of the first IHB and the orientations of relevant OHs, and are denoted according to the criteria outlined in the caption of fig. 3: a conformer is *d* if the first IHB is of the H15...O14 type and *s* if it is of the H17...O14 type; in *d*-*r* and *s*-*w* conformers, H16 is oriented towards the side of the first IHB, and in *d*-*w* and *s*-*r* conformers it is oriented to the other side.

The combinations of monomers’ orientations and conformers’ geometries are denoted by numbers, written after the acronym denoting the molecule (table S2). Their numbering is based on the conformers’ energy-increasing sequence in the DFT/B3LYP/6-31+G(d,p) results for T1.

The two possible mutual orientations of the convex sides of the methylene bridges give origin to outstretched-type geometries if they are oriented in opposite ways, and to half-bowl-shaped geometries if they are oriented in the same way; the latter is denoted by adding the letter *y* to the number denoting the conformer. Both options are shown for each combination of monomers’ geometries, to provide complete illustration.

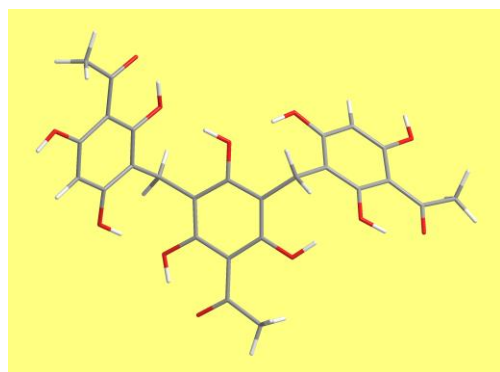

1

orientation of acyl groups: up—down—down

monomers’ conformer types: d-r—s-w—s-w

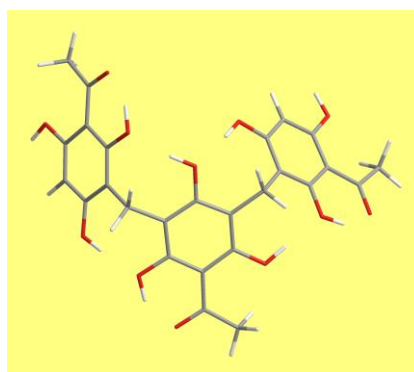

1-y

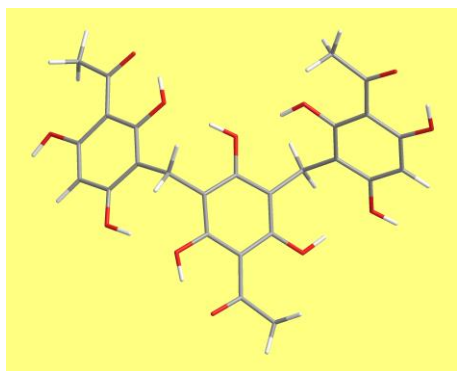

2

orientation of acyl groups: up—down—up—down  
monomers' conformer types: d-r—s—w—d-r

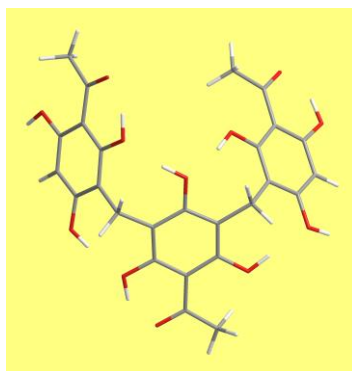

2-y

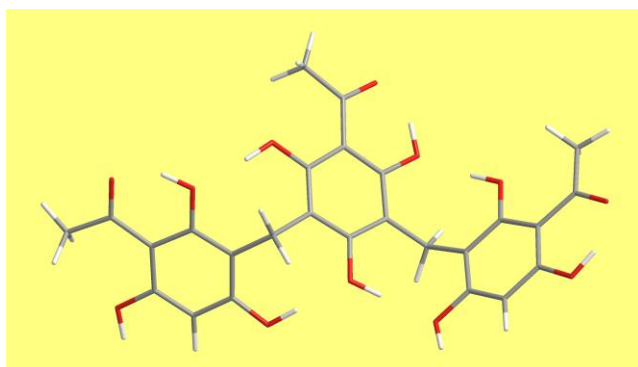

3

orientation of acyl groups: up—up—up—down  
monomers' conformer types: d-r—d-r—d-r—d-r

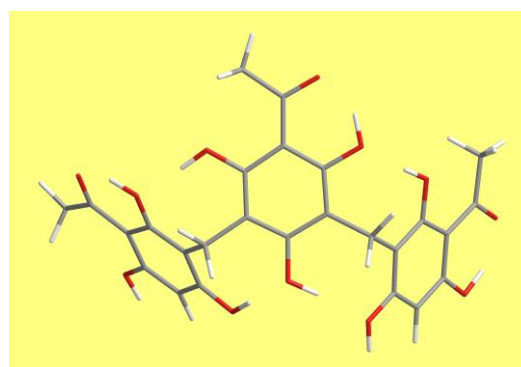

3-y

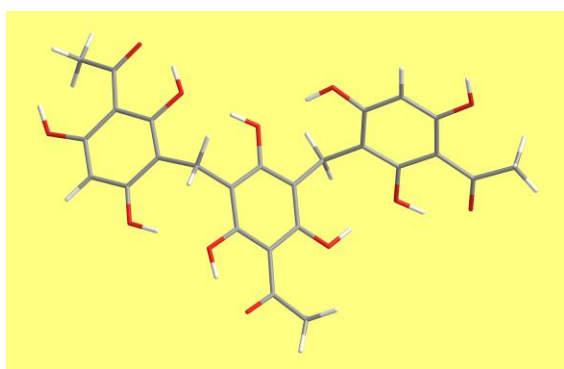

4

orientation of acyl groups: up—down—down—down  
monomers' conformer types: d-r—u—s—w—s-w

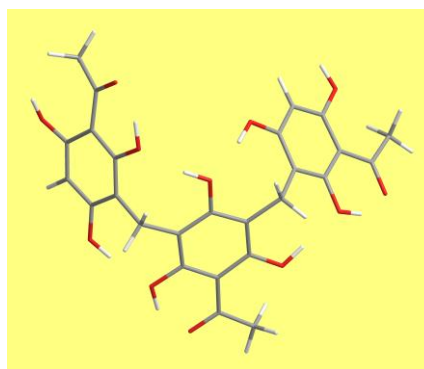

4-y

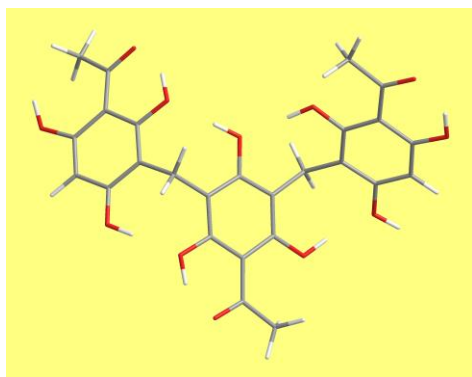

5

orientation of acyl groups: up—down—up—down  
monomers' conformer types: d-r—u-s—w-d—r-r

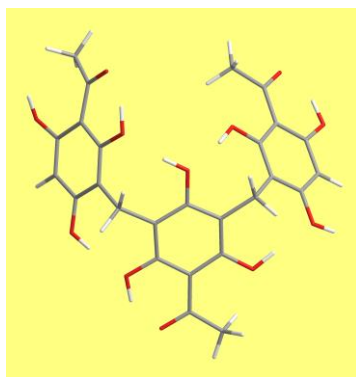

5-y

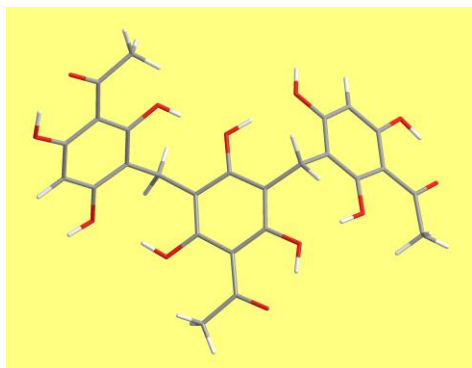

6

orientation of acyl groups: up—down—down—down  
monomers' conformer types: s-w—d-r—d-r—d-r

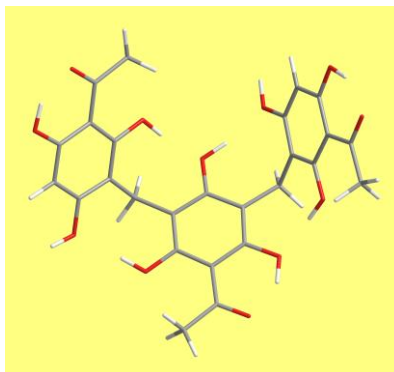

6-y

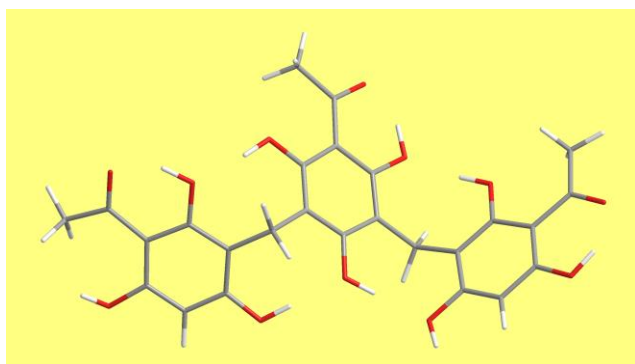

7

orientation of acyl groups: up—up—up—up  
monomers' conformer types: d-r—u-d—r-d—r-r

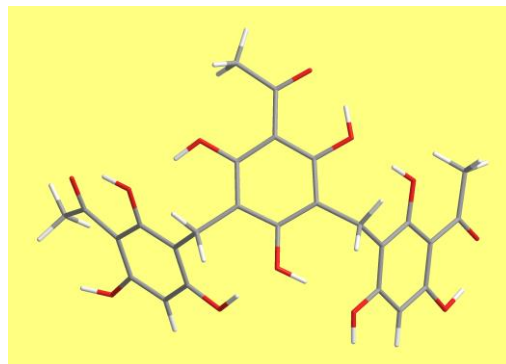

7-y

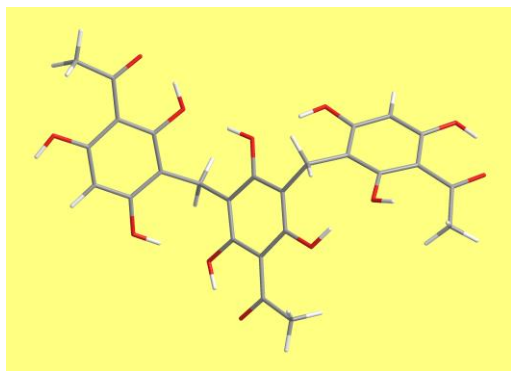

8

orientation of acyl groups: up—down—down  
monomers' conformer types: d-r—s-w—d-r-u

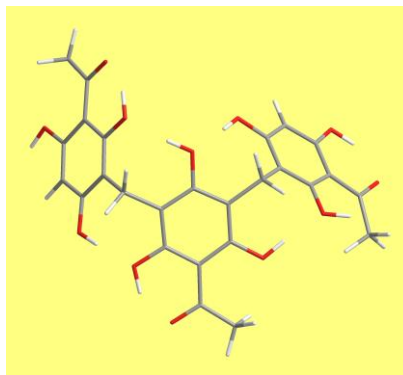

8-y

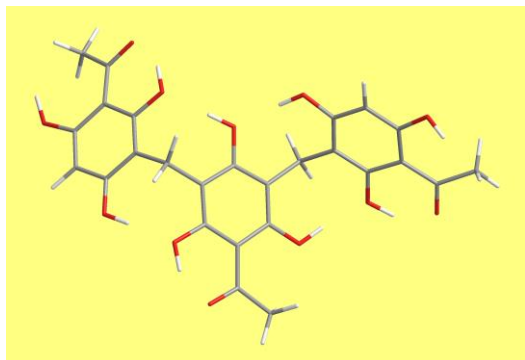

9

orientation of acyl groups: up—down—down  
monomers' conformer types: d-r-u—d-r—s-w-u

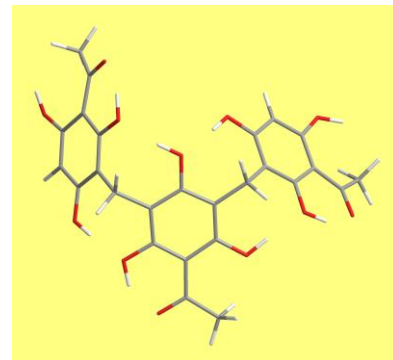

9-y

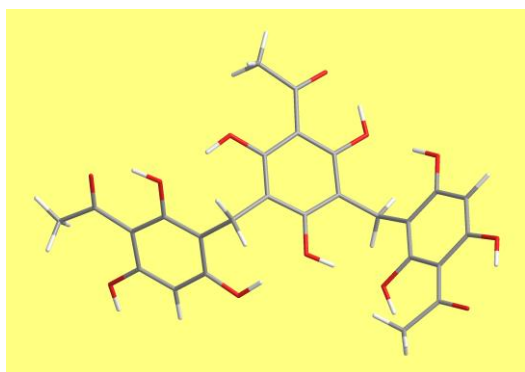

10

orientation of acyl groups: up—up—down  
monomers' conformer types: d-r—d-r—d-w-u

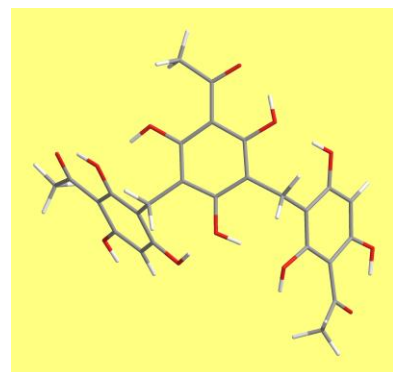

10-y



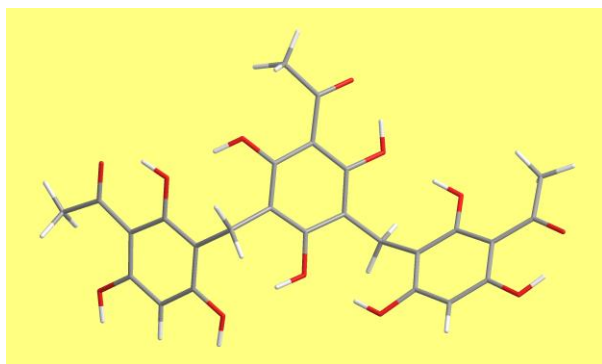

11

orientation of acyl groups: up—up—up  
monomers' conformer types: d-w—d-w—d-w

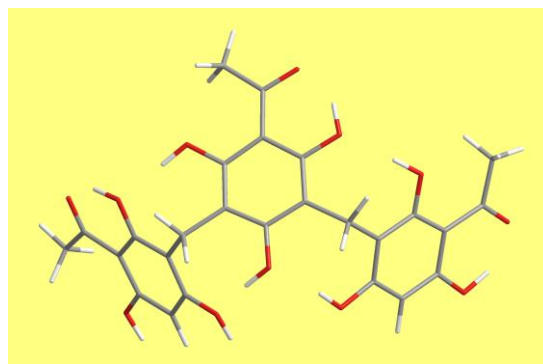

11-y

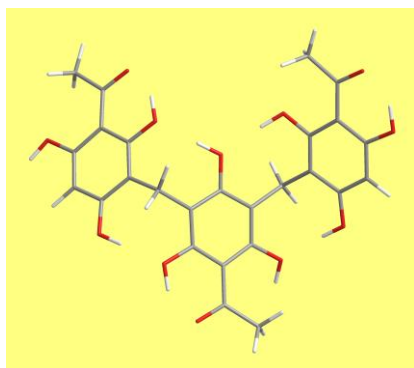

12

orientation of acyl groups: up—down—up  
monomers' conformer types: d-r—s-w-u—d-w

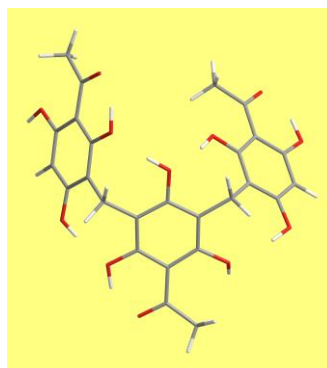

12-y

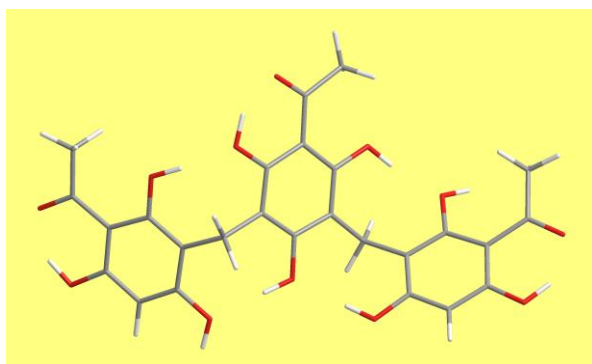

13

orientation of acyl groups: up—up—up  
monomers' conformer types: s-w—s-w—d-w-u

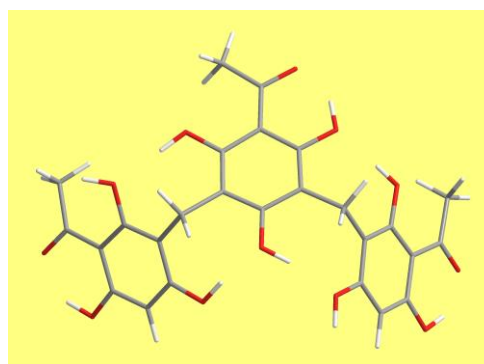

13-y

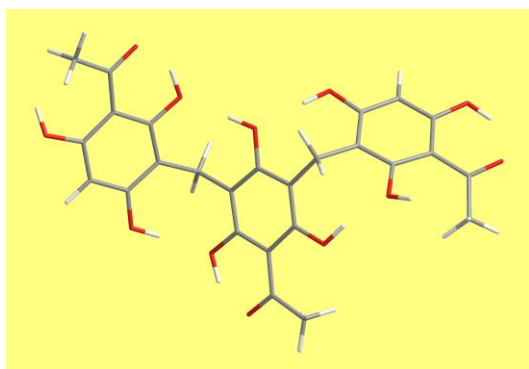

14

orientation of acyl groups: up—down—down  
monomers' conformer types: d-r-u—s-w—d-w-u

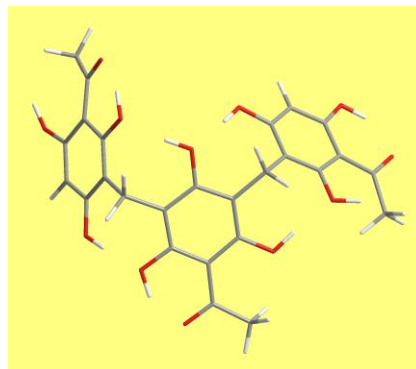

14-y

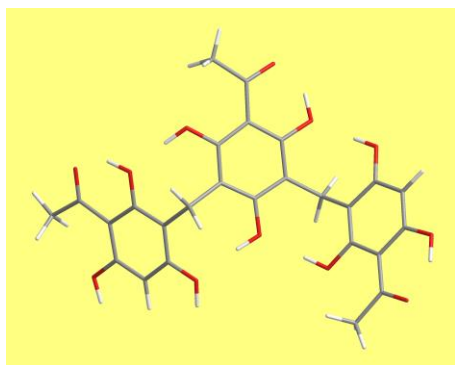

15

orientation of acyl groups: up—up—down  
monomers' conformer types: d-w—d-w—d-w

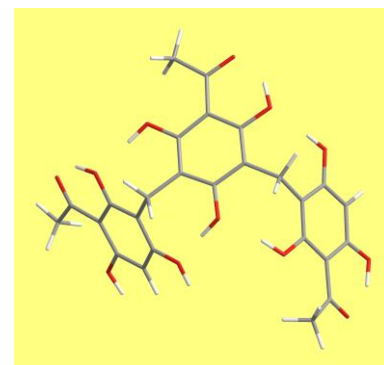

15-y

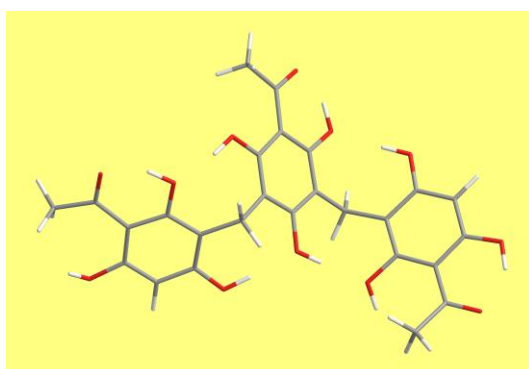

16

orientation of acyl groups: up—up—down  
monomers' conformer types: d-r-u—d-r—d-r-u

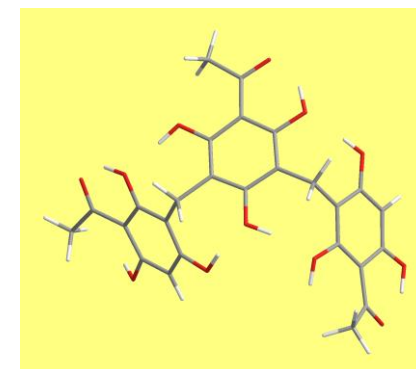

16-y

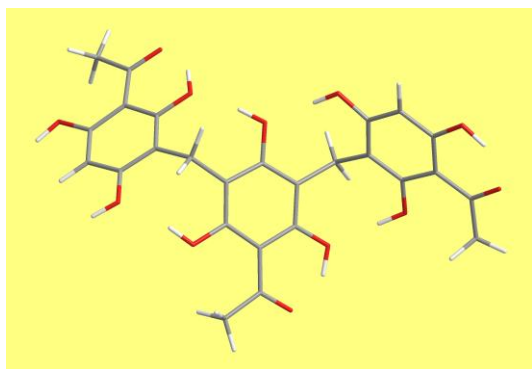

17

orientation of acyl groups: up—down—down  
monomers' conformer types: d-w—d-w—d-w

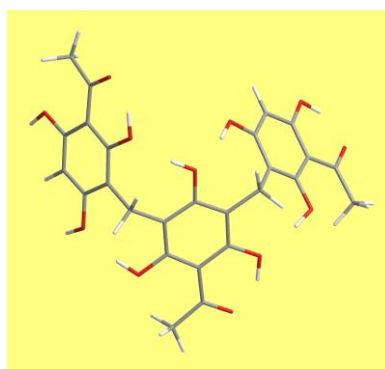

17-y

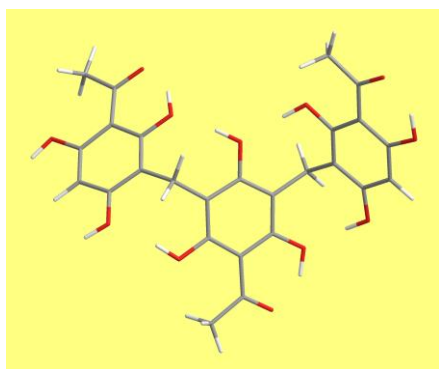

18

orientation of acyl groups: up—down—up  
monomers' conformer types: d-w—d-r—d-w

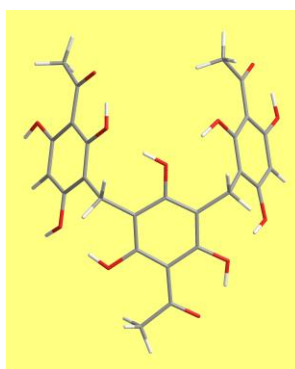

18-y

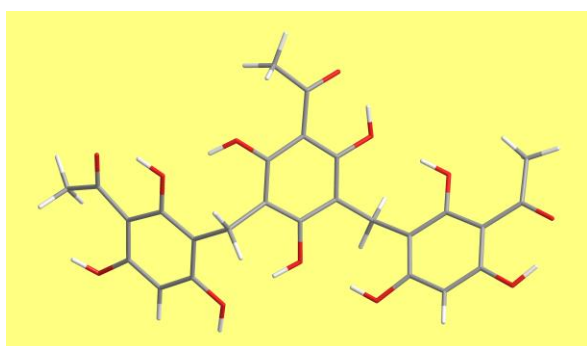

19

orientation of acyl groups: up—up—up  
monomers' conformer types: d-w—u—d-w—d-w

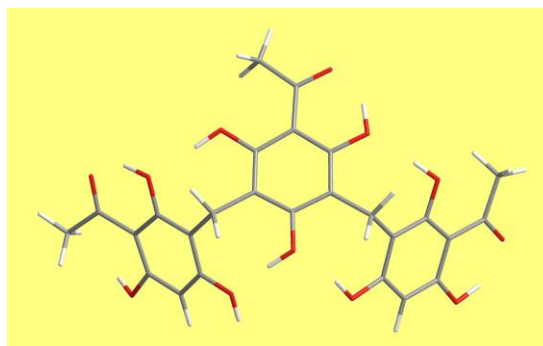

19-y

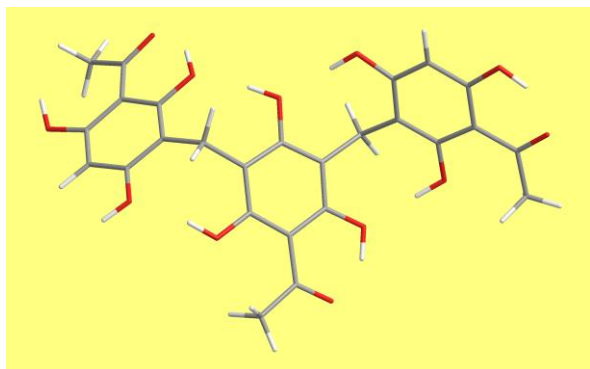

20

orientation of acyl groups: up—down—down  
monomers' conformer types: d-w-u—d-w—d-w

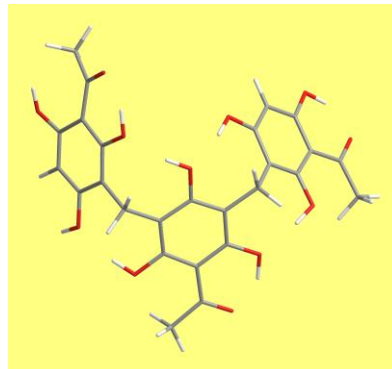

20-y

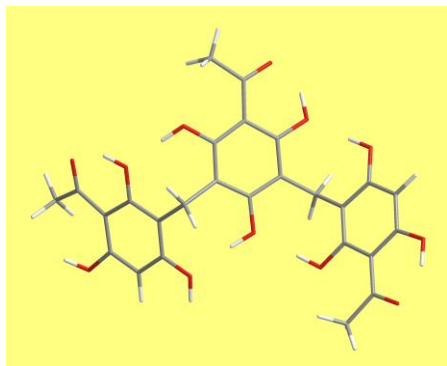

21

orientation of acyl groups: up—up—down  
monomers' conformer types: d-w-u—d-w—d-w

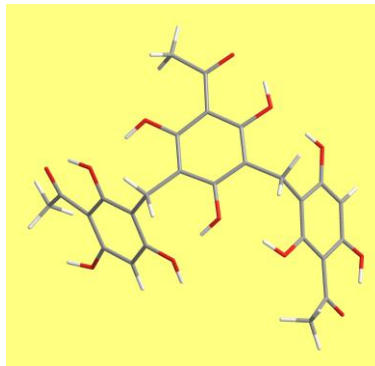

21-y

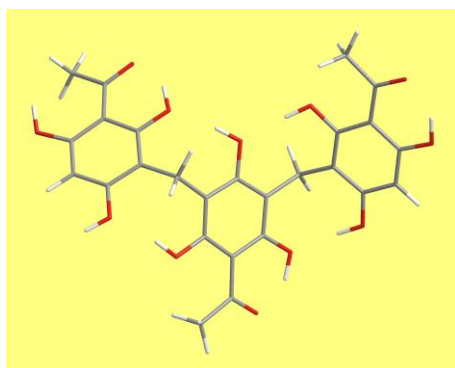

22

orientation of acyl groups: up—down—up  
monomers' conformer types: d-w-u—d-w—d-w

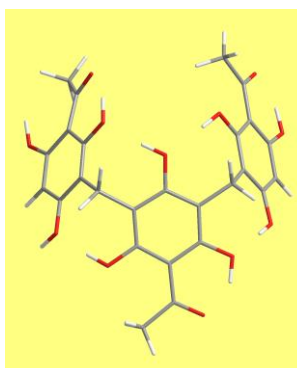

22-y

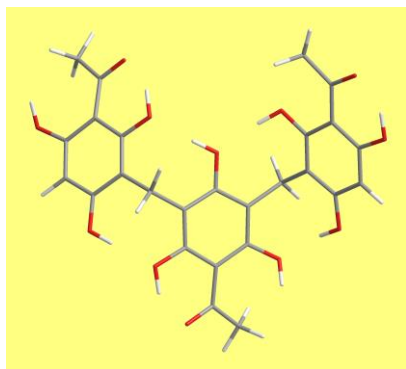

23

orientation of acyl groups: up—down—up

monomers' conformer types: d-r-u—s-w-u—d-w

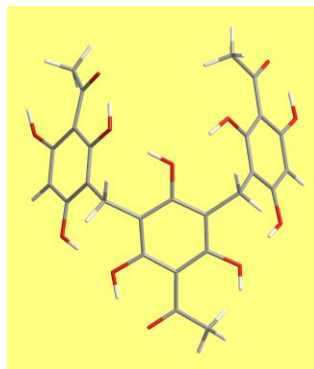

23-y

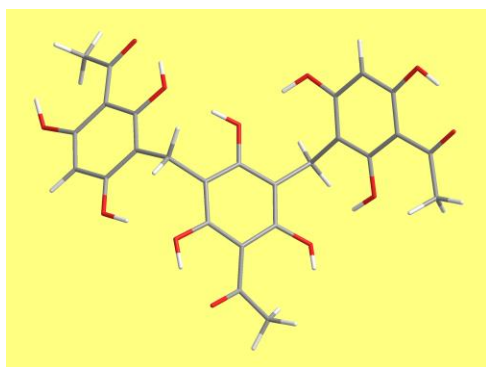

24

orientation of acyl groups: up—down—down

monomers' conformer types: d-r-u—s-w-u—d-w

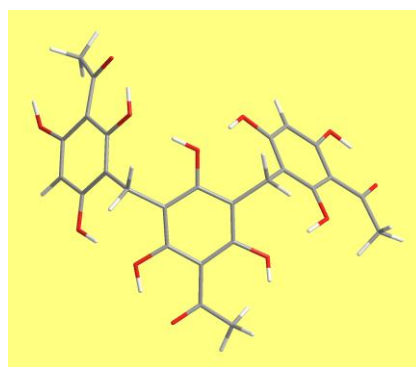

24-y

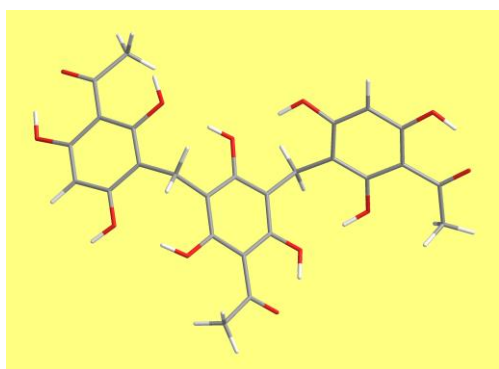

25

orientation of acyl groups: up—down—down

monomers' conformer types: s-w-u—d-w—d-w

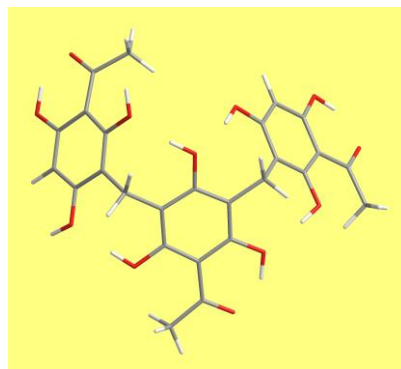

25-y

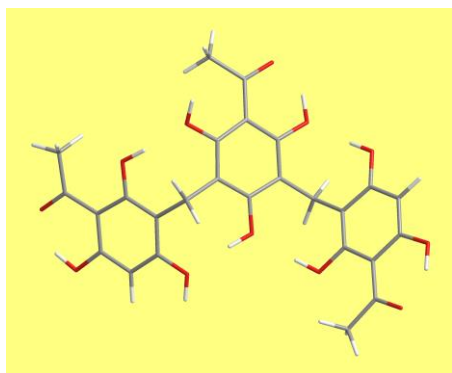

26

orientation of acyl groups: up—up—down  
monomers' conformer types: s-w—d-w-u—d-w

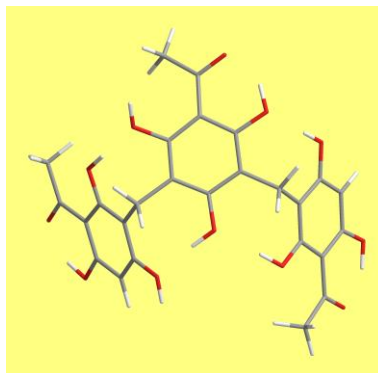

26-y

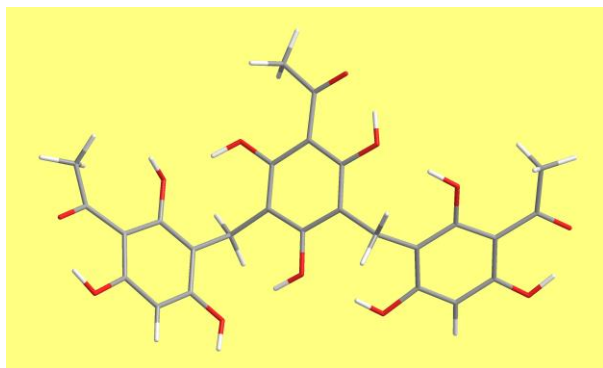

27

orientation of acyl groups: up—up—up  
monomers' conformer types: s-w-u—d-w—d-w

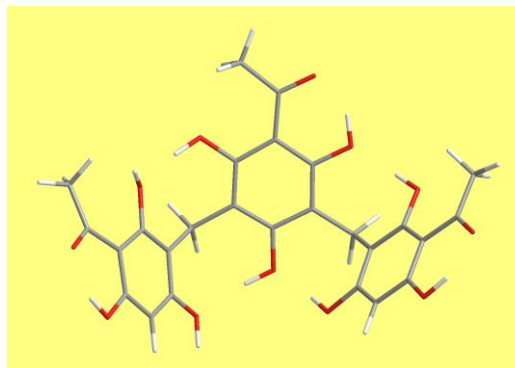

27-y

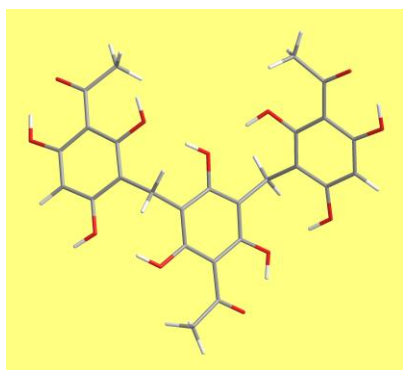

28

orientation of acyl groups: up—down—up  
monomers' conformer types: s-w-u—d-w—d-w

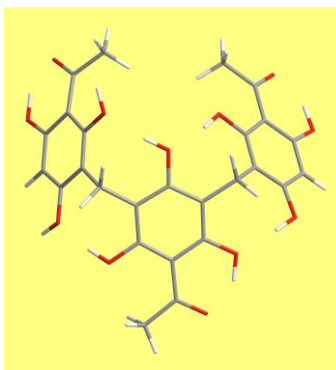

28-y

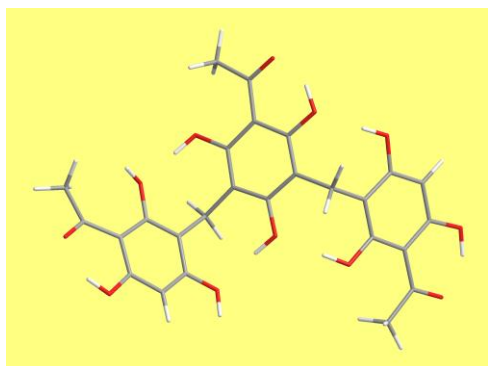

29

orientation of acyl groups: up—up—down  
monomers' conformer types: s-w-u—d-w—d-w

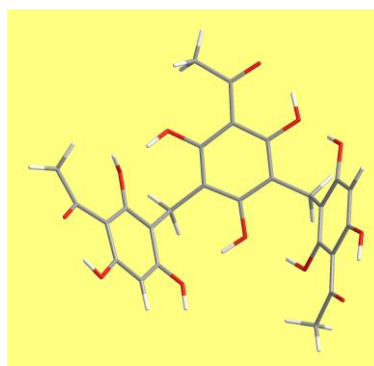

29-y



## Figure S 2

### Geometries of the conformers of the calculated trimeric acylphloroglucinols in which no OH is replaced by a different function

The conformers are visualized showing pairs of outstretched-shaped and half-bowl-shaped corresponding conformers. The acronym identifying the conformer is reported on the left under each image; the meaning of the numbers and letters used to build the acronyms is explained in section 3.1 and in table S2, and visualised in fig. S1. The conformers of structure T1 are not reported because they are shown in figure S1.

The relative energy values (kcal/mol, DFT/B3LYP/6-31+G(d,p) results) are reported centrally or centre-right under the conformers' images.

### Structure T7

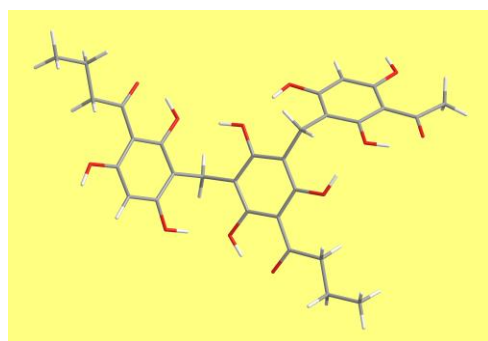

1 0.000

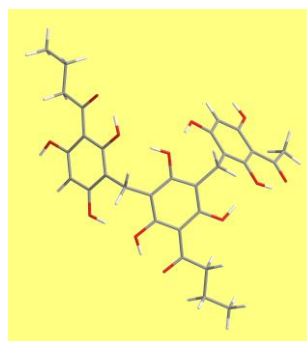

1-y 1.007

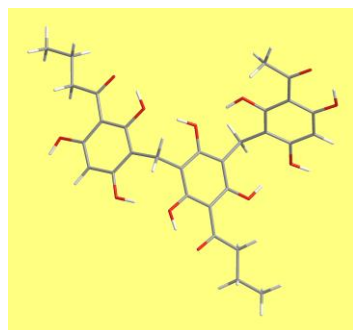

2 3.467

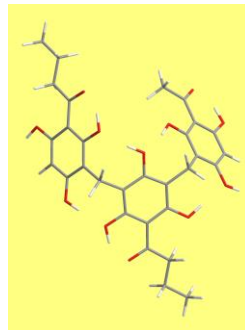

2-y 3.626

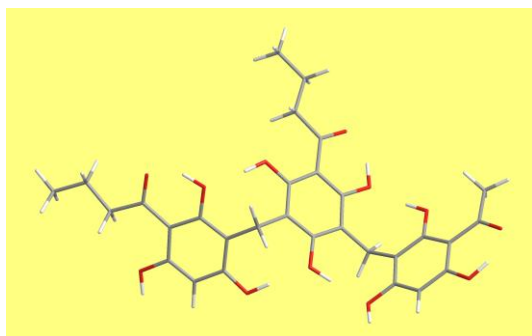

3

3.837

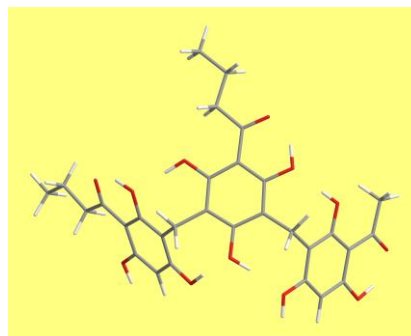

3-y

3.863

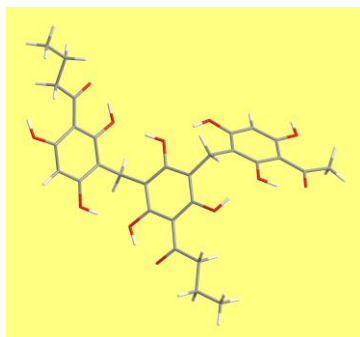

4

3.636

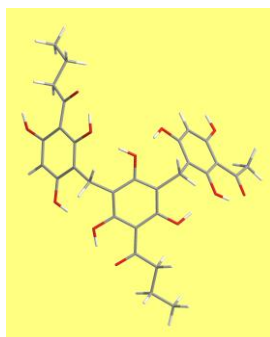

4-y

3.946

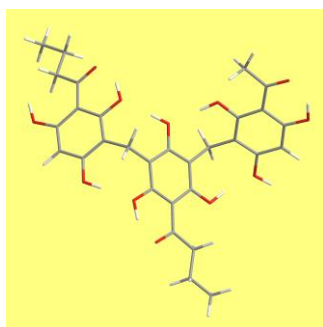

5

7.001

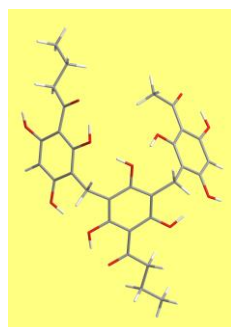

5-y

7.121

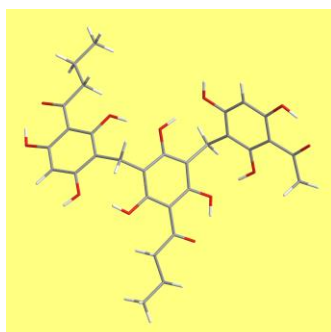

6

7.372

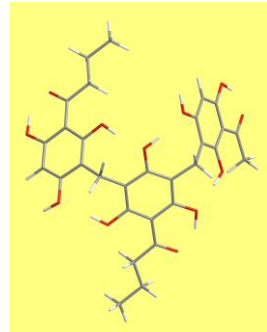

6-y

7.448

## Structure T9

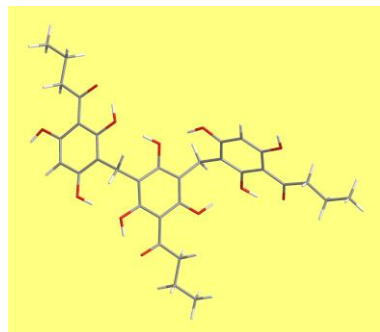

1 0.000

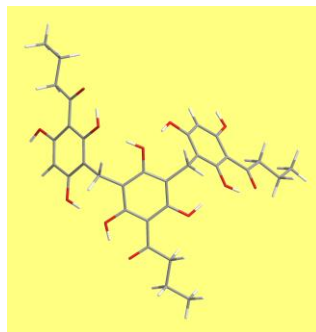

1-y 0.319

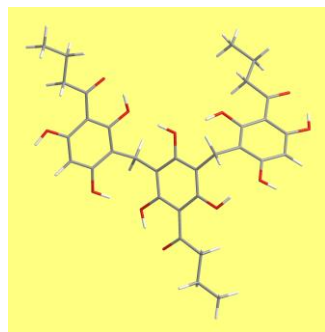

2 3.655

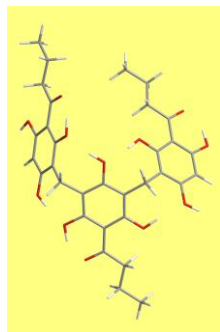

2-y 3.452

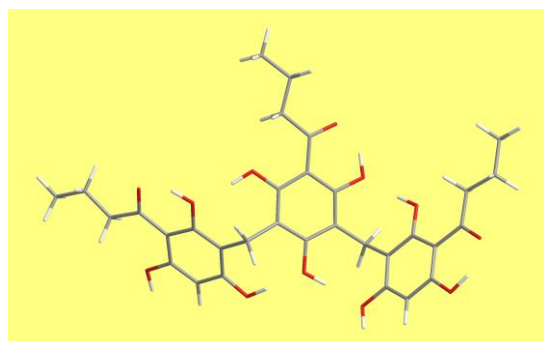

3 3.810

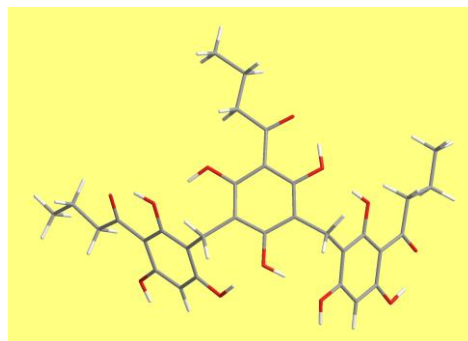

3-y 3.836

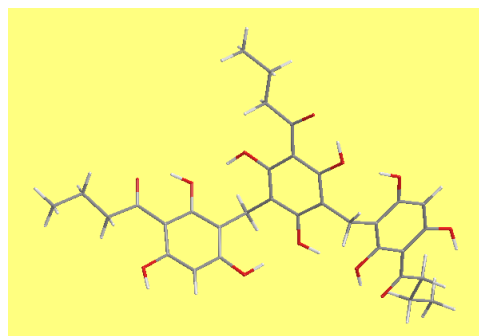

4

3.632

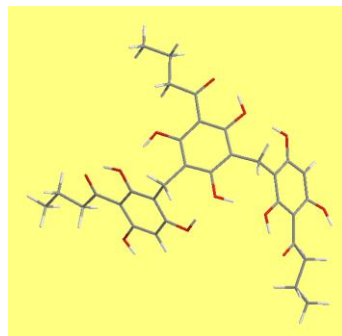

4-y

3.933

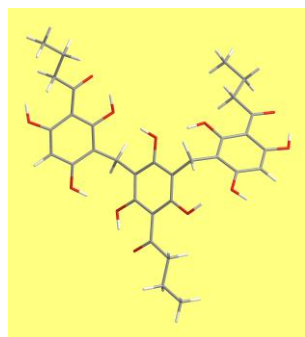

5

7.067

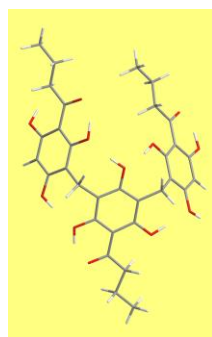

5-y

7.252

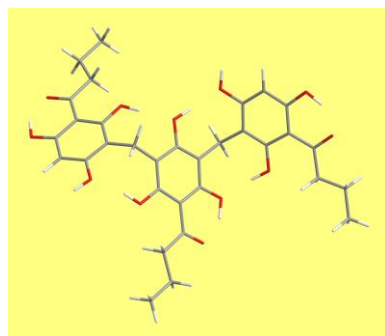

6

7.419

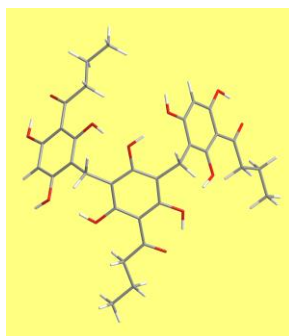

6-y

7.503

## Structure T9-M5,5'

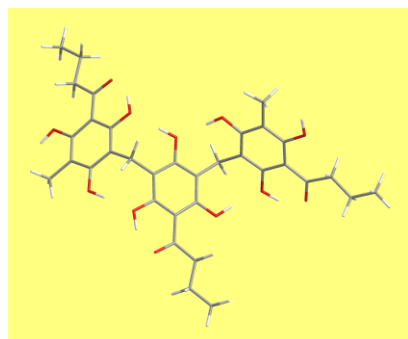

1 0.000

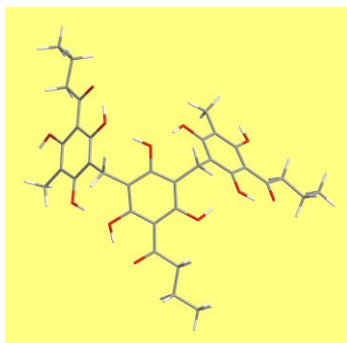

1-y 0.266

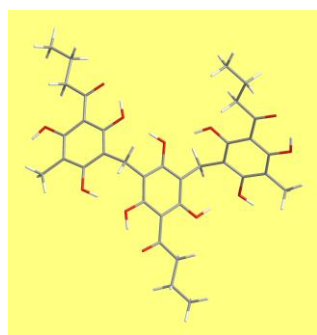

2 2.866

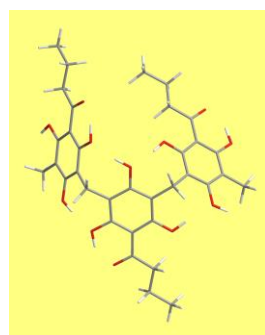

2-y 3.067

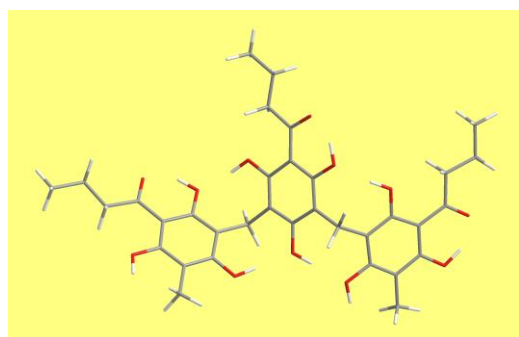

3 3.323

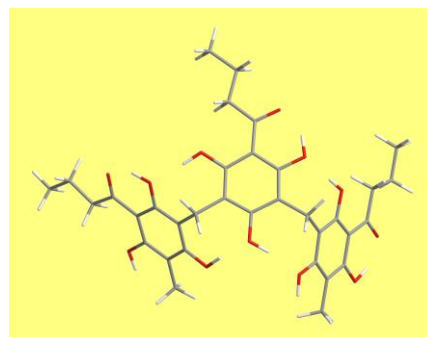

3-y 3.356

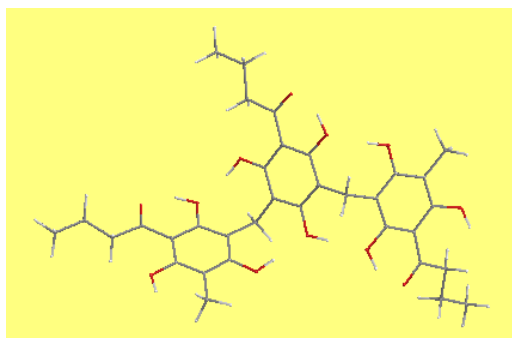

4

3.654

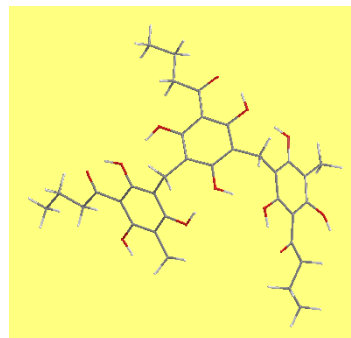

4-y

3.934

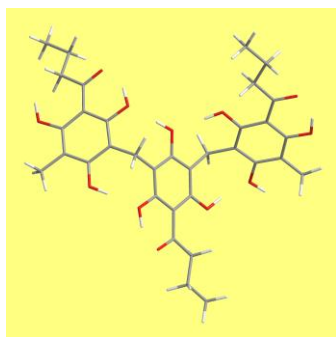

5

6.479

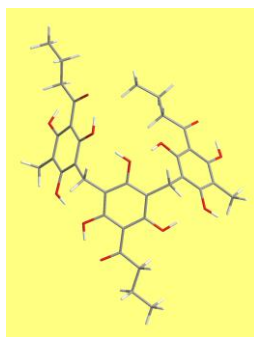

5-y

6.687

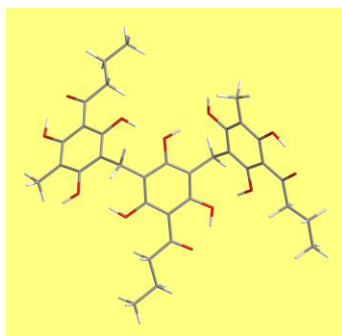

6

6.240

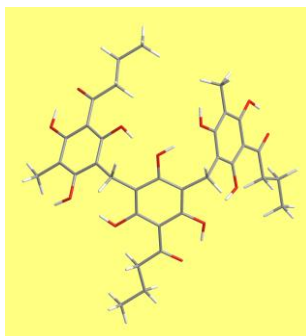

6-y

6.358

## Structure T10

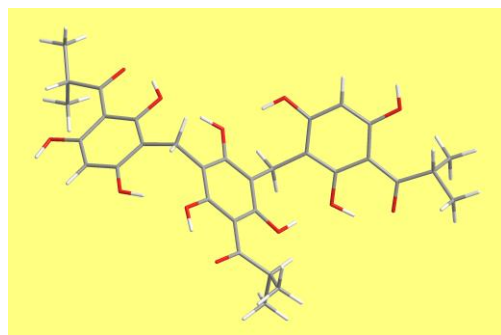

1 0.000

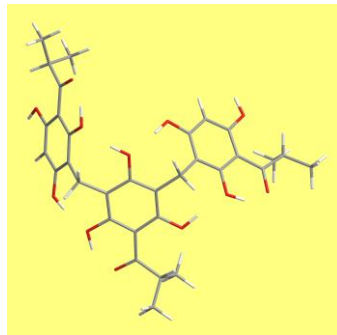

1-y 0.275

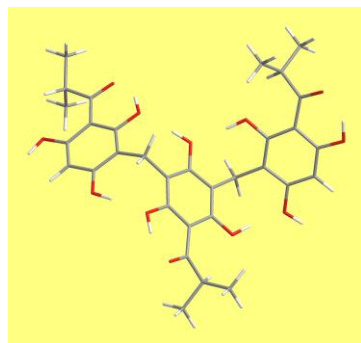

2 3.831

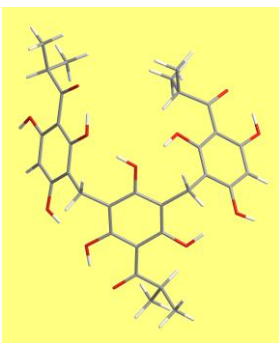

2-y 3.744

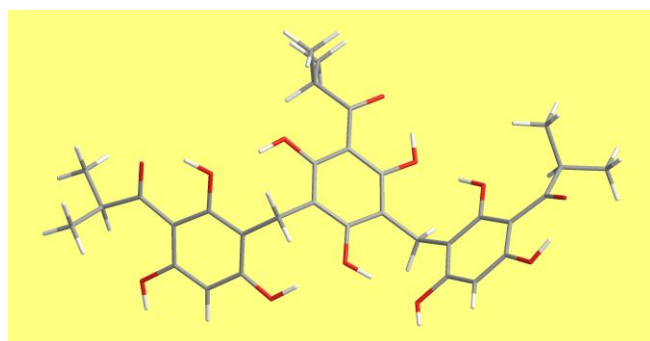

3 4.030

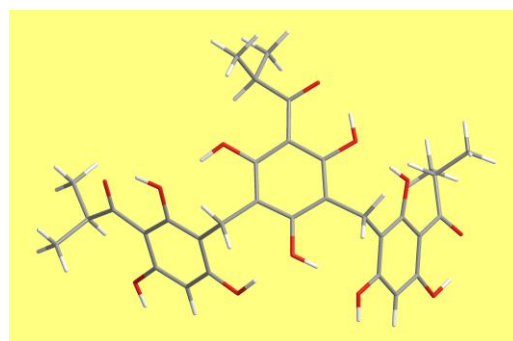

3-y 3.987



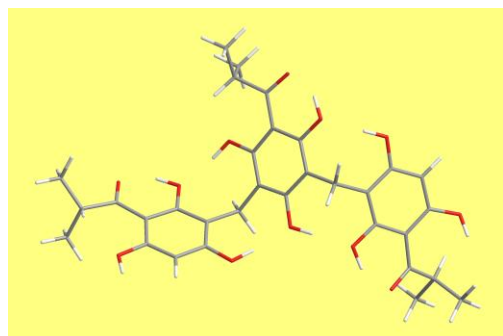

4

3.784

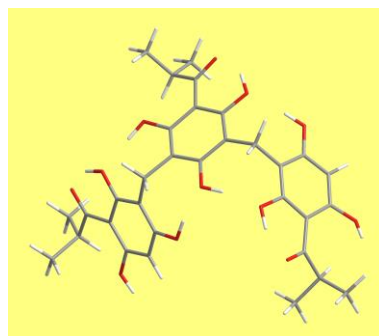

4-y

4.303

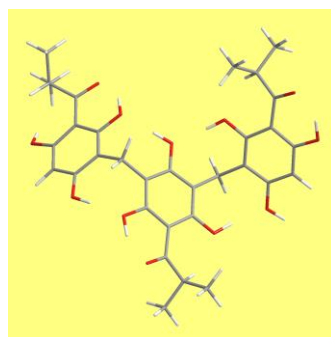

5

7.720

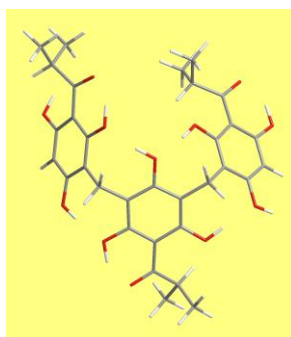

5-y

7.582

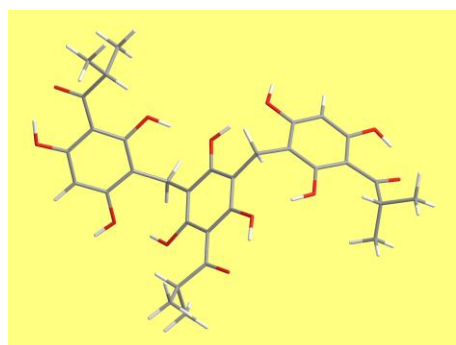

6

7.942

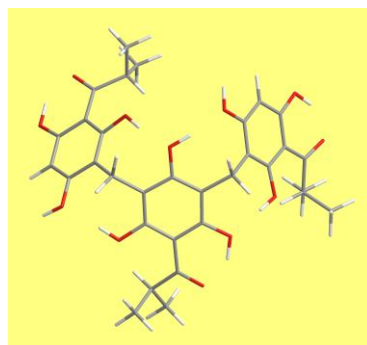

6-y

8.169

### Figure S3

#### Illustration of the outcome of the reversal of the conformer-types of the two outer monomers in trimeric acylphloroglucinols

The figure considers a trimeric acylphloroglucinol with  $R \neq R''$ , in which the OHs at C6 and C2'' are replaced by  $\text{OCH}_3$  groups, and shows the two possibilities (I and II) with outstretched geometry. Conformers of this type have very close energies in the HF results, and identical energies in the DFT results. For this reason, only one of them is reported for each molecule in tables and figures (along with the corresponding half-bowl-shaped conformer).

#### a) The two possibilities with outstretched geometry

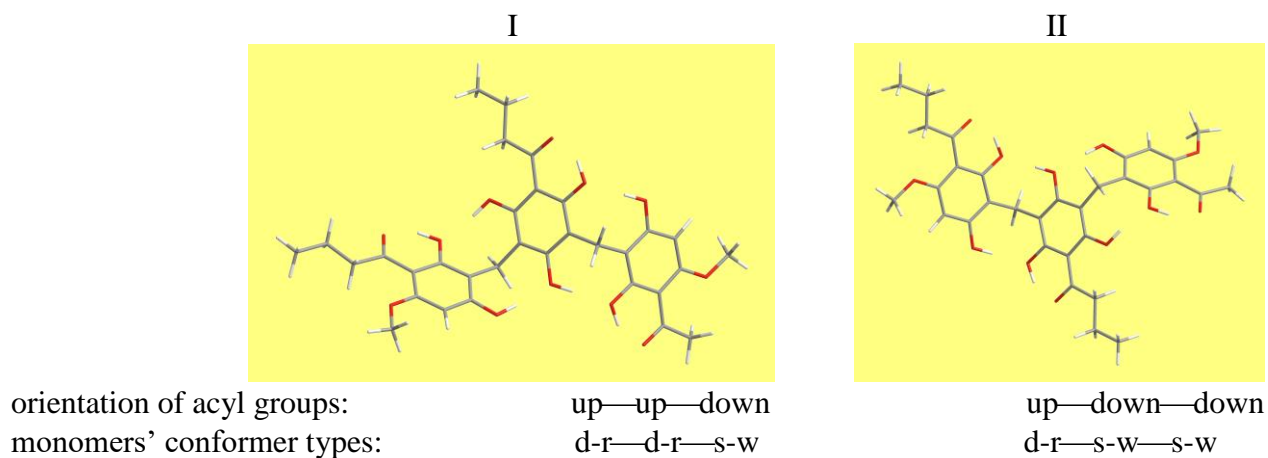

#### b) Conformer II seen from two different perspectives

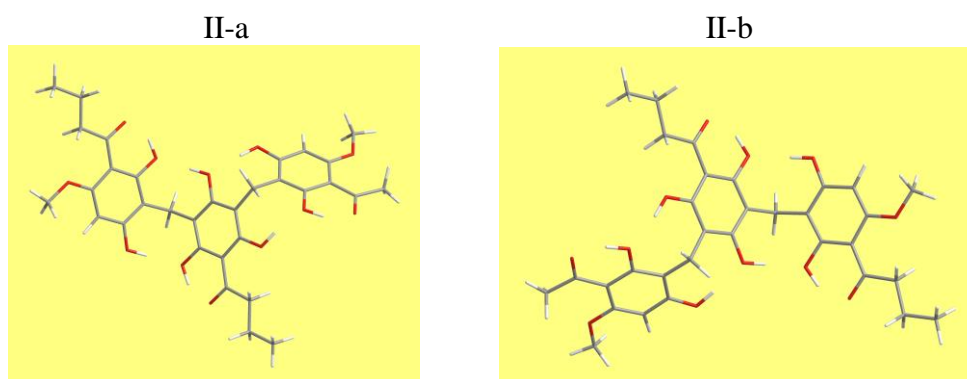

Image II-a shows conformer II from the same perspective as in part (a). Image II-b shows it from a rotated perspective which reverses the roles of the first and third conformer; within this perspective, the orientation of the monomers and the monomers' conformer-types are the same as for conformer I.

#### Figure S 4

##### Geometries of the conformers of the calculated trimeric acylphloroglucinols in which one or more OH groups are replaced by OCH<sub>3</sub> groups, and no other substitutions occur

The conformers are visualized showing pairs of outstretched-shaped and half-bowl-shaped corresponding conformers. The acronym identifying the conformer is reported on the left under each image; the meaning of the numbers and letters used to build the acronyms is explained in section 3.2 and in table S2.

The relative energy values (kcal/mol, DFT/B3LYP/6-31+G(d,p) results) are reported centrally or centre-right under the conformers' images.

#### Structure T3-ET6,2''

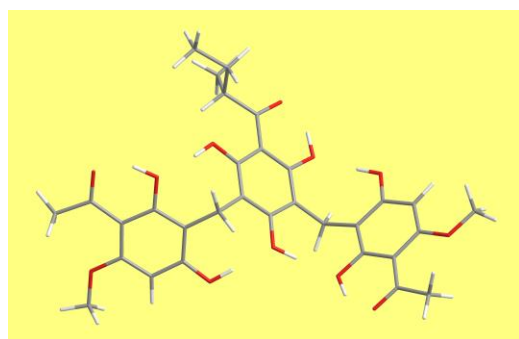

1 0.000

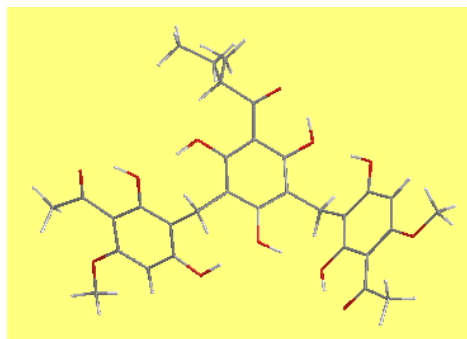

1-y 0.485

#### Structure T3- M5,3''-ET6,2''

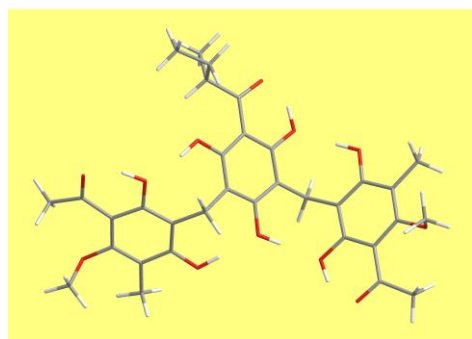

1 0.000

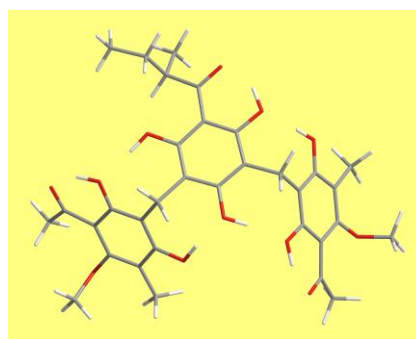

1-y 0.028

### Structure T6-M5,3''-ET6,4''

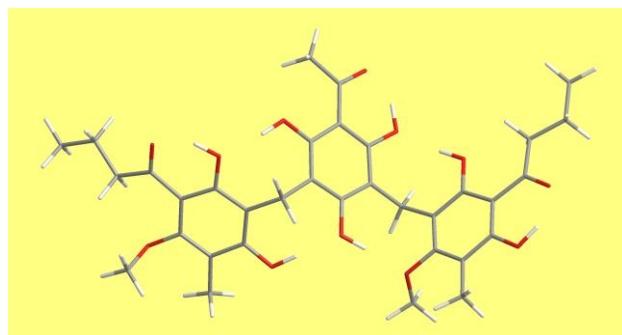

1 0.000

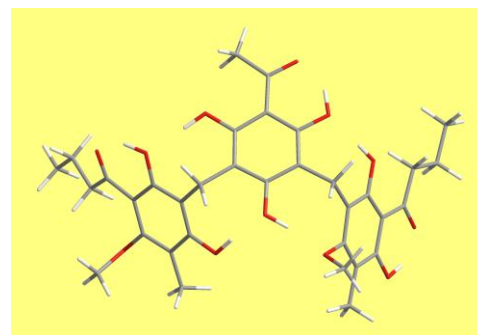

1-y-out-out 0.141

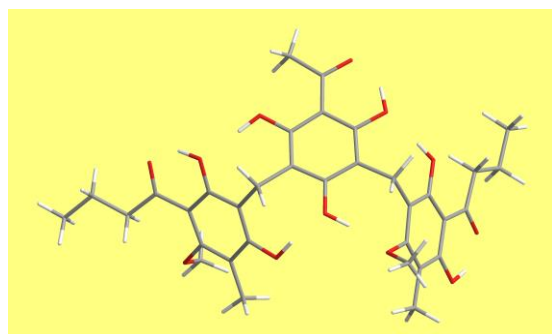

1-y-in-out 0.190

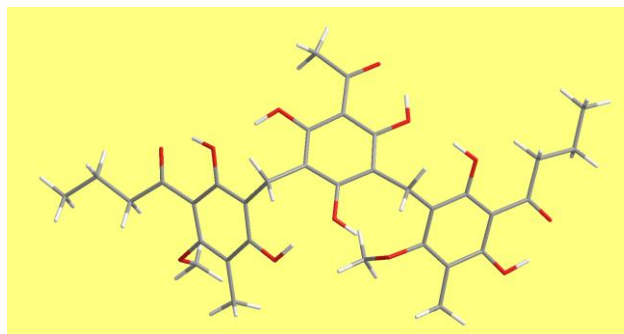

1-y-in-in 4.737

### Structure T7-ET6,2''

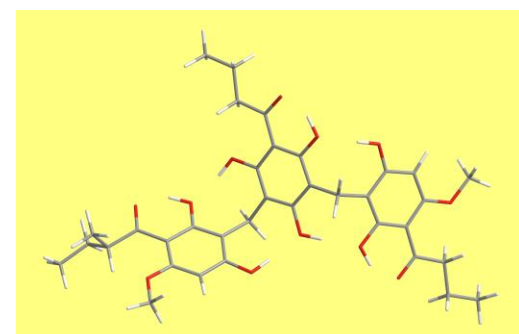

1 0.000

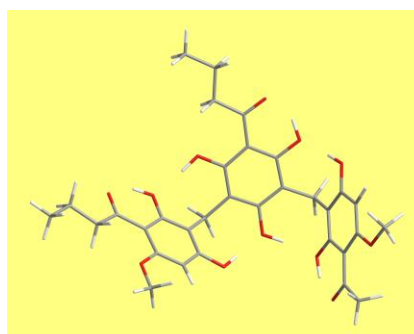

1-y 0.347

### Structure T7- M5,3"-ET6,2"

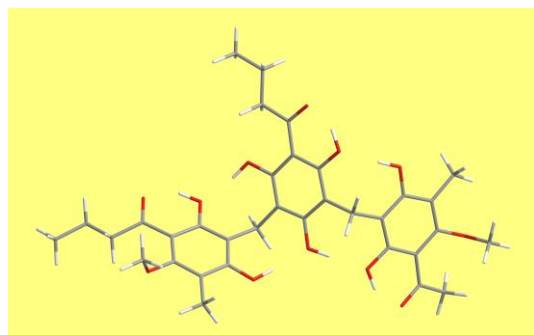

1 0.000

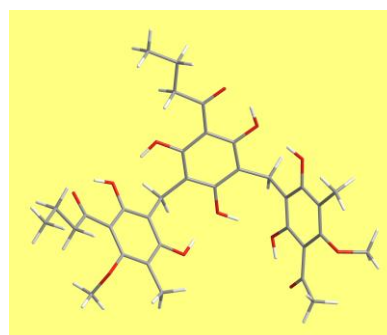

1-y 0.288

,

### Structure T9-ET6,2"

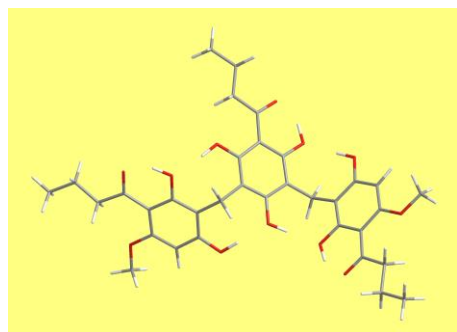

1 0.000

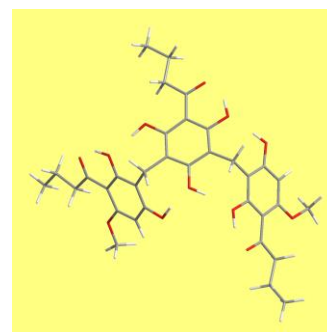

1-y 0.346

### Structure T9-M5,3"-ET6,2"

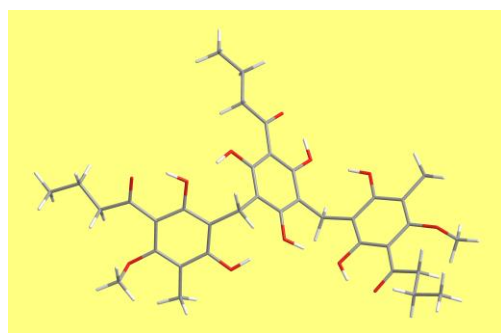

1 0.000

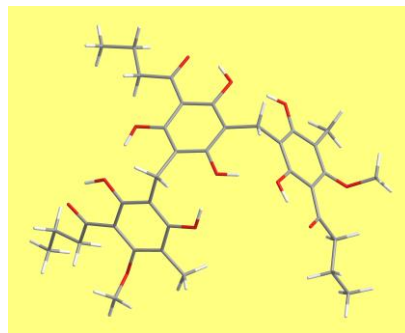

1-y 0.279

### Structure T9-M5,3''-ET4,2''

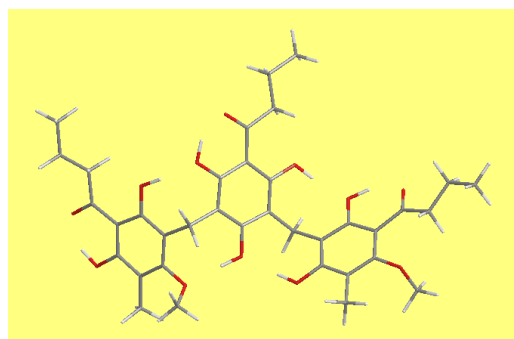

1 0.000

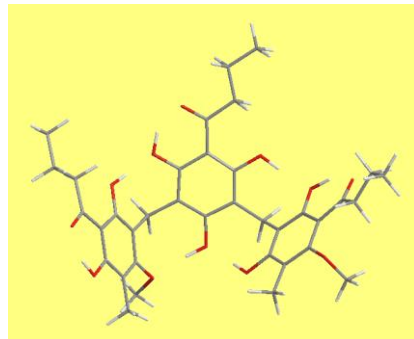

1-y 0.2097

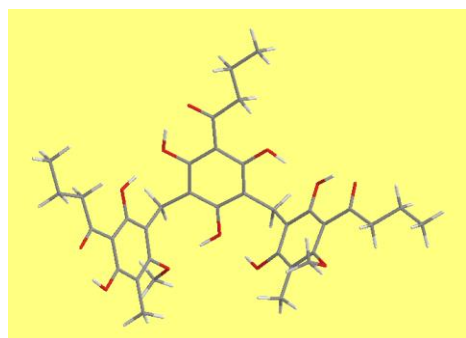

1-y-in-out 0.2184

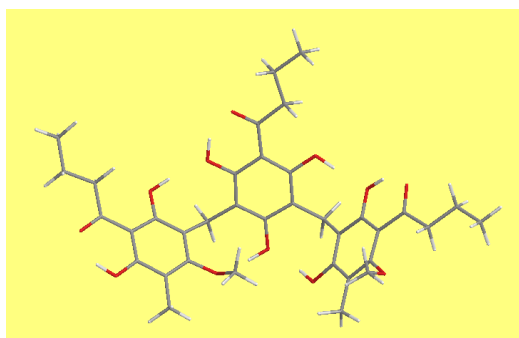

1-y-in-in 3.2935

### Structure T10-ET6,2''

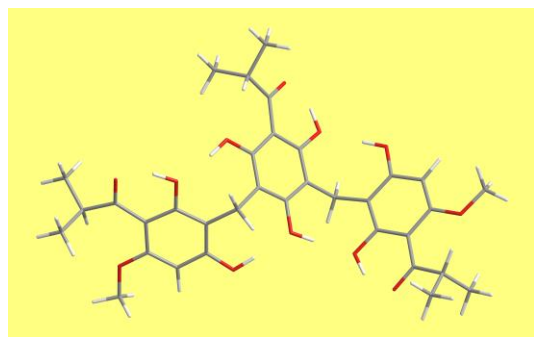

1 0.0000

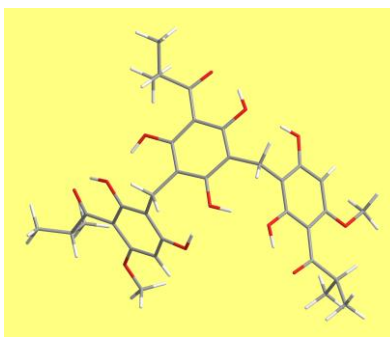

1-y 0.303

### Structure T10-M5,3"-ET6,2"

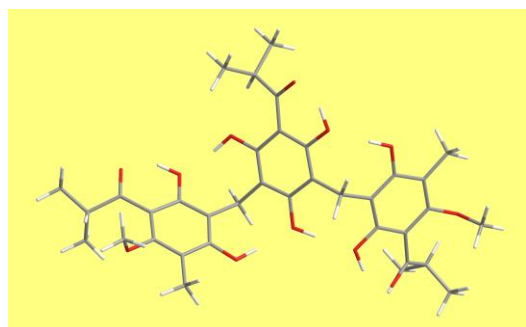

1 0.018

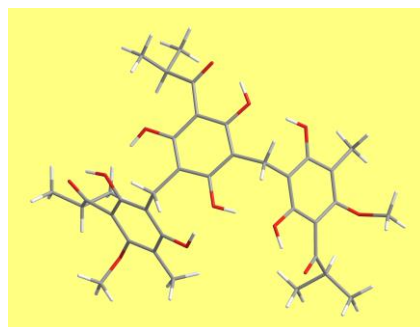

1-y 0.569

### Structure T10-M5,3"-ET6,2",6"

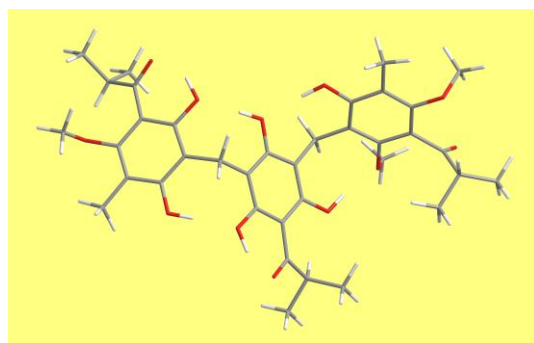

1 0.000

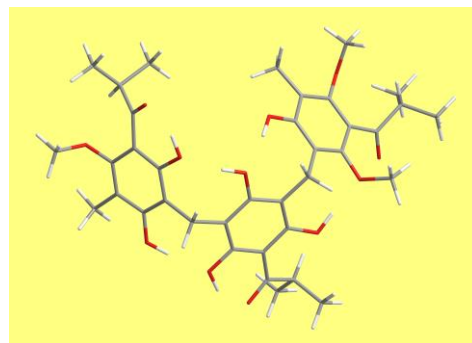

1-y 0.728

### Structure T11-ET6,2"

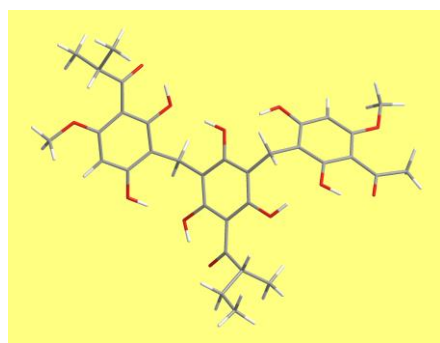

1 0.000

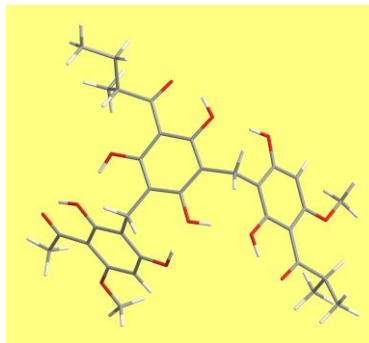

1-y 0.388



### Structure T11- M5,3"-ET6,2"

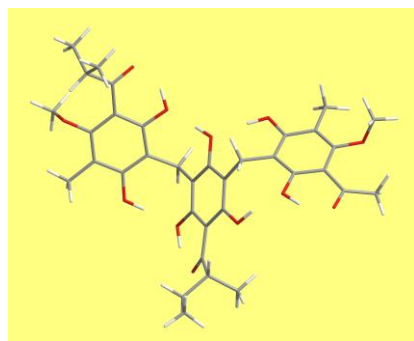

1 0.000

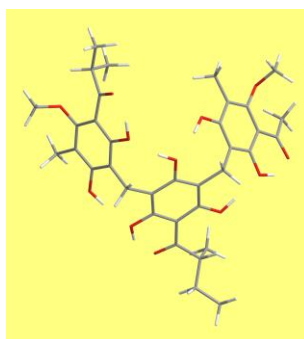

1-y 0.003

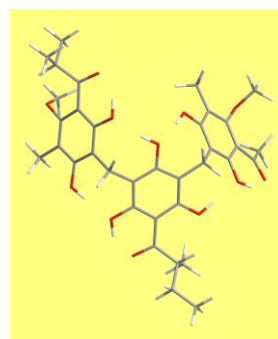

1-y-in-out 0.508

### Structure T13-ET6,2"

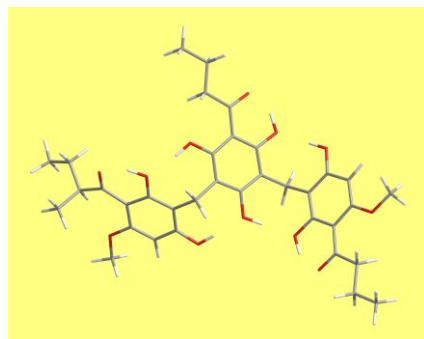

1 0.000

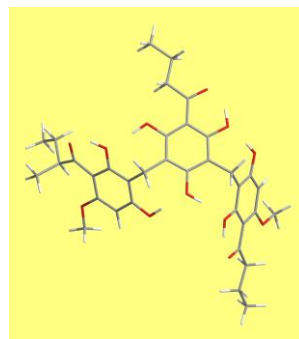

1-y 0.355

### Structure T13- M5,3"-ET6,2"

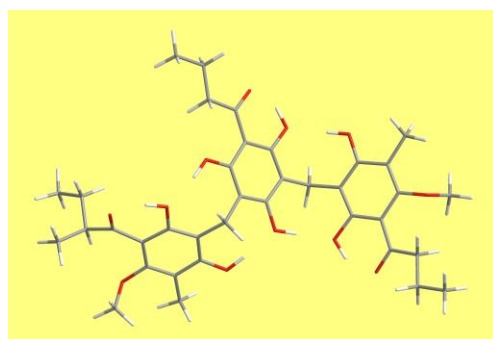

1 0.000

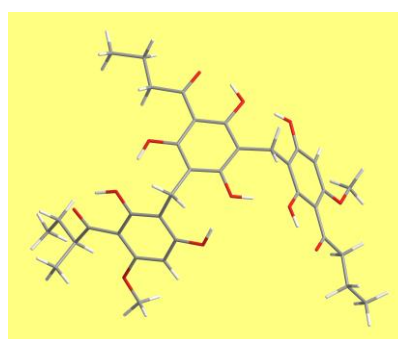

1-y 0.281

### Structure T14-ET6,2''

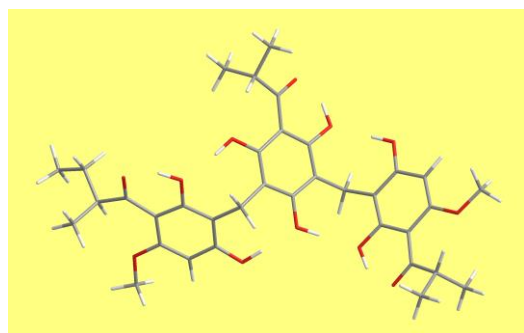

1 0.000

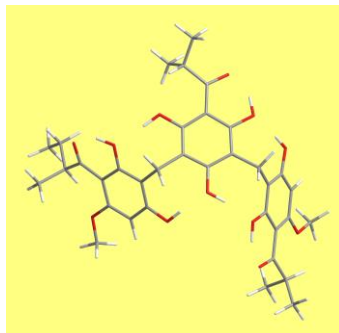

1-y 0.614

### Structure T14- M5,3''-ET6,2''

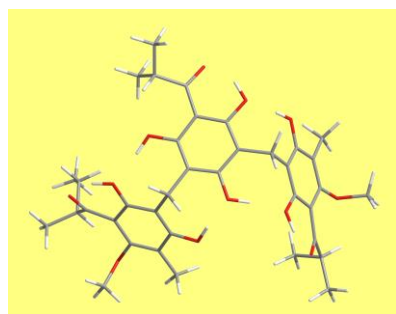

1-y 0.000

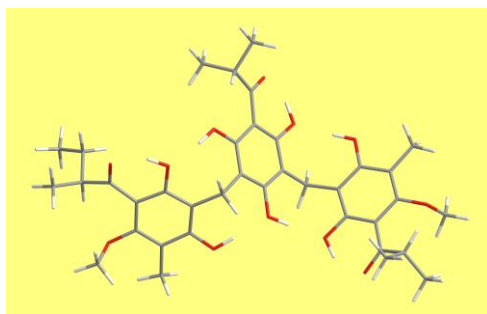

1 0.011

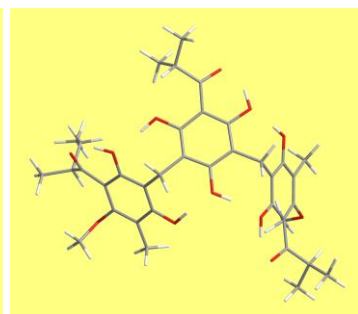

1-y-in-out 0.517

### Figure S 5

#### Viable geometries of trimeric acylphloroglucinols in which an inward OH *ortho* to the acyl group is replaced by a keto O

The table shows the independent numbering of the conformers of molecules of this type.

The conformers are visualized showing pairs of outstretched-shaped and half-bowl-shaped corresponding conformers. The acronym identifying the conformer is reported on the left under each image, and the explanation of the characterising geometry features is provided underneath.

#### a) Structures in which the OH at C6'' is replaced by a keto O

The conformers of structure T7-KT6''-M5,3'',3'' are utilized for illustration.

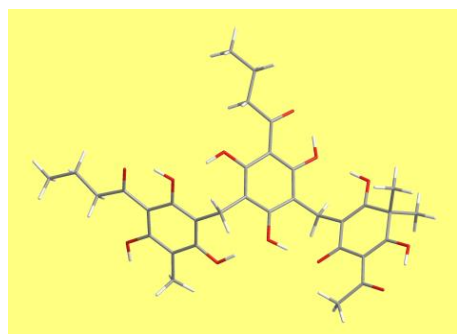

1

orientation of acyl groups: up—up—down  
monomers' conformer types: d-r—d-r—d-w

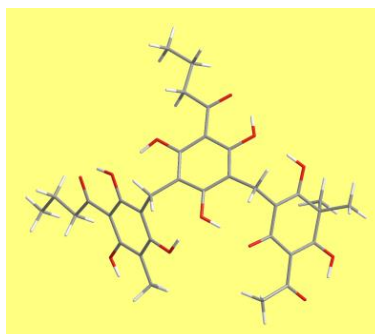

1-y

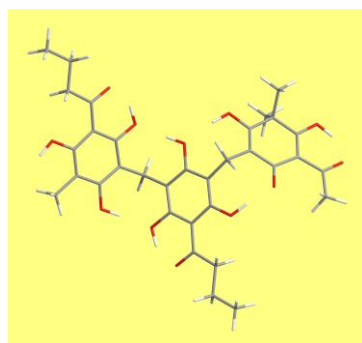

2

orientation of acyl groups: up—down—down  
monomers' conformer types: d-r—s-w—d-w

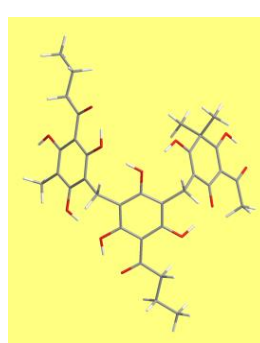

2-y

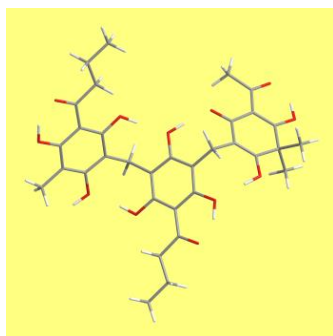

3

orientation of acyl groups: up—down—up—down  
monomers' conformer types: s-w—d-r—d-w—s-w

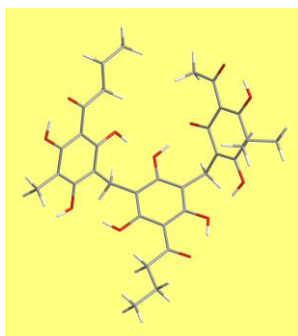

3-y

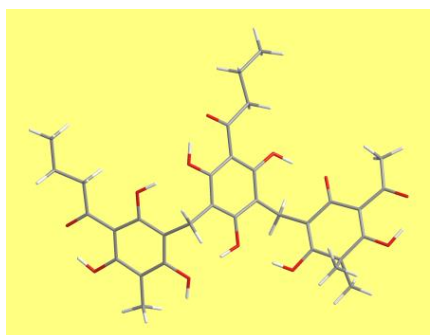

4

orientation of acyl groups: up—up—up—down  
monomers' conformer types: s-w—s-w—d-w—s-w

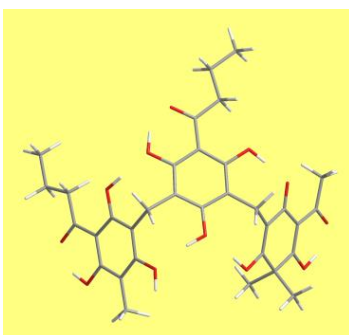

4-y

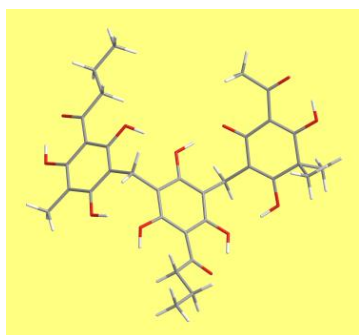

5

orientation of acyl groups: up—down—up—down  
monomers' conformer types: s-r—d-r—u-d—d-w

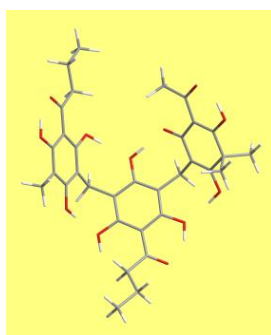

5-y

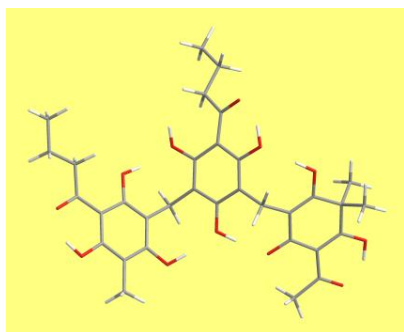

6

orientation of acyl groups: up—up—down  
monomers' conformer types: s-r—d-r—u-d-w

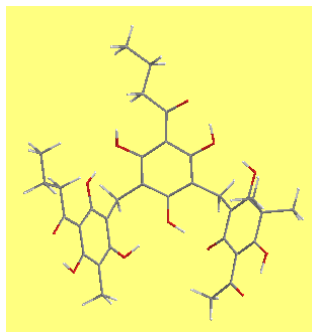

6-y

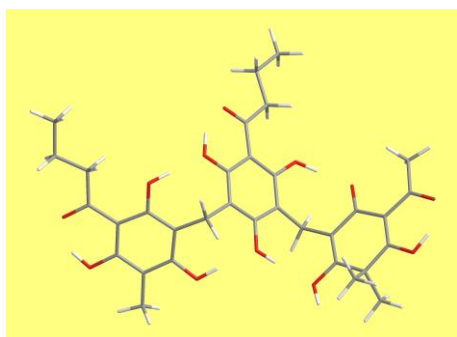

7

orientation of acyl groups: up—up—up  
monomers' conformer types: s-r—s-r—d-r

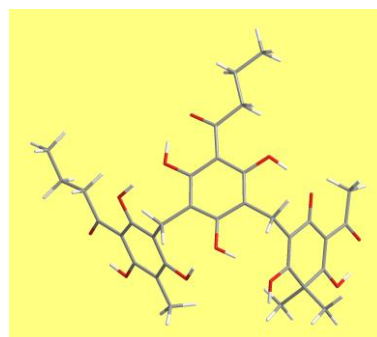

7-y

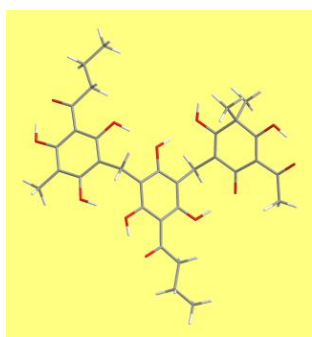

8

orientation of acyl groups: up—down—down  
monomers' conformer types: s-r—s-r—d-r

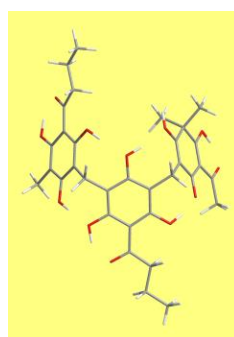

8-y

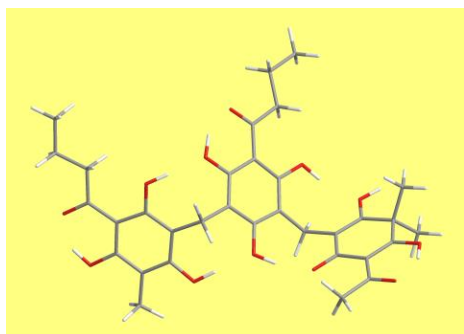

9

orientation of acyl groups: up—up—down  
monomers' conformer types: s-r—s-r—d-r

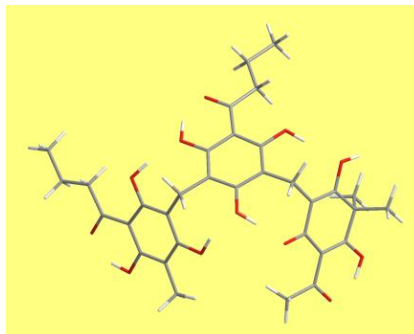

9-y

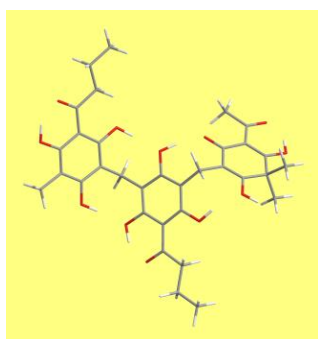

10

orientation of acyl groups: up—down—up  
monomers' conformer types: s-r—s-r—d-r

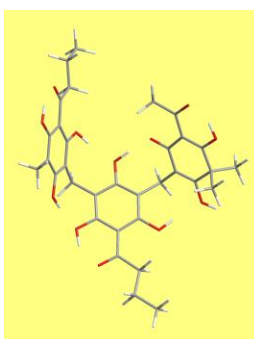

10-y

**b) Structures in which the OH at C2 is replaced by a keto O**

The conformers of structure T8-KT2-M5,5,3'' are utilized for illustration.

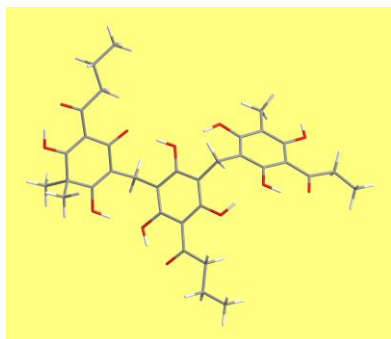

1

orientation of acyl groups: up—down—down  
monomers' conformer types: s-r—s-w—s-w

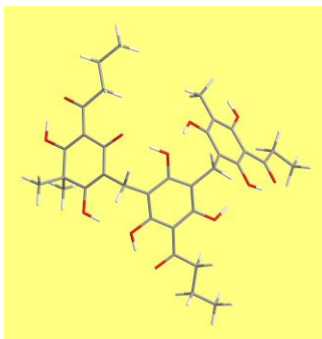

1-y

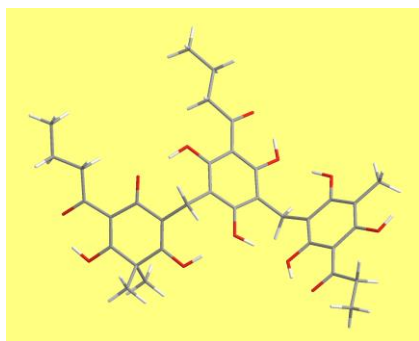

2

orientation of acyl groups: up—up—down  
monomers' conformer types: s-r—d-r—s-w

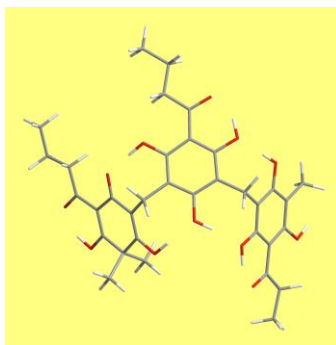

2-y

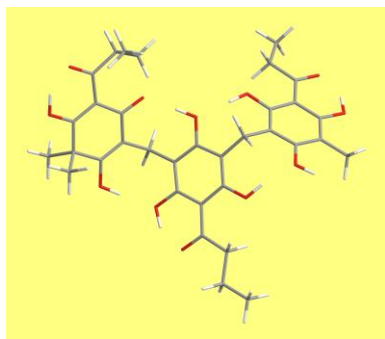

3

orientation of acyl groups: up—down—up  
monomers' conformer types: s-r—s-w—d-r

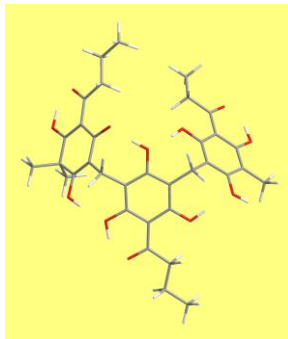

3-y



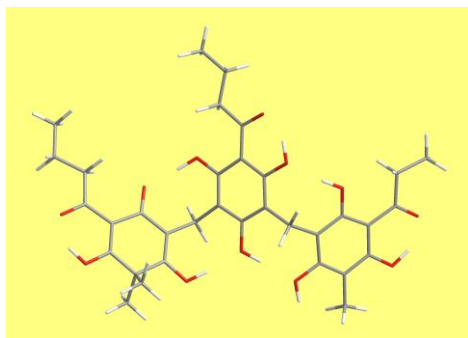

4

orientation of acyl groups: up—up—up  
monomers' conformer types: s-r—d-r—d-r

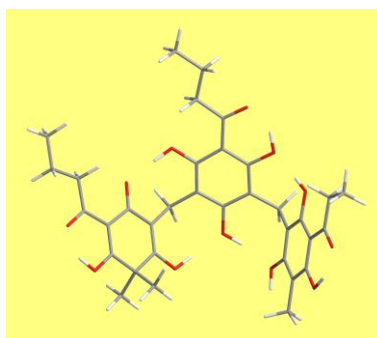

4-y

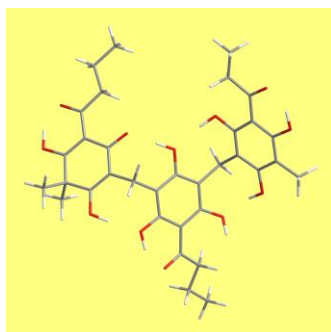

5

orientation of acyl groups: up—down—up  
monomers' conformer types: s-r—s-w-u—d-w

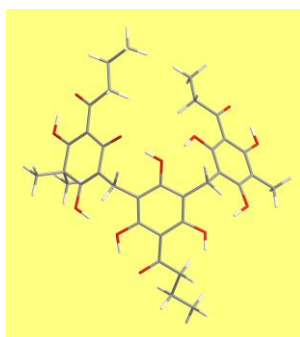

5-y

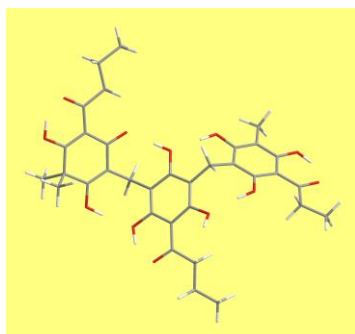

6

orientation of acyl groups: up—down—down  
monomers' conformer types: s-r—s-w-u—d-w

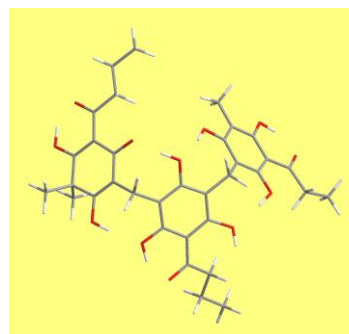

6-y

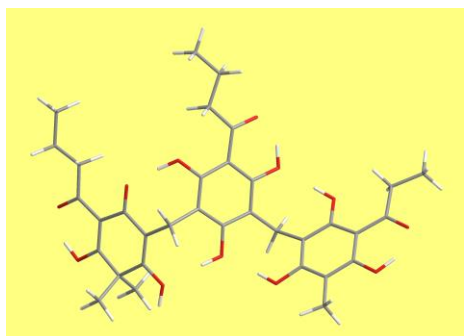

7

orientation of acyl groups: up—up—up  
monomers' conformer types: s-w—d-w—d-w

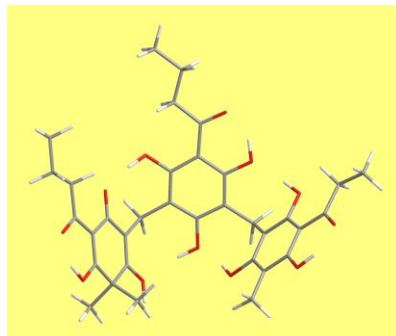

7-y

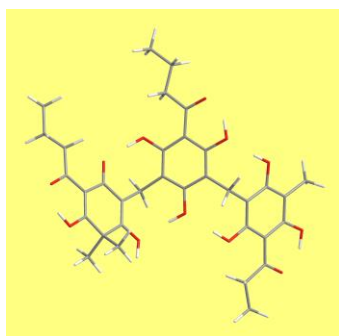

8

orientation of acyl groups: up—up—down  
monomers' conformer types: s-w—d-w—d-w

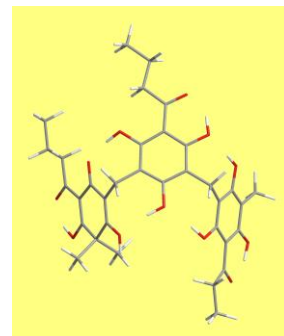

8-y

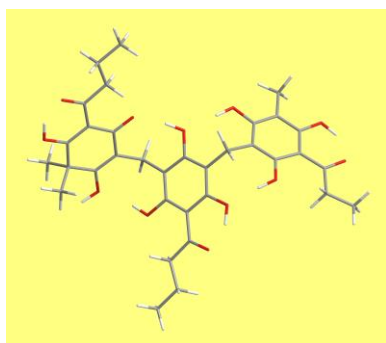

9

orientation of acyl groups: up—down—down  
monomers' conformer types: s-w—s-r—s-r

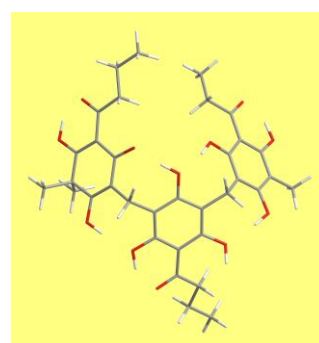

9-y

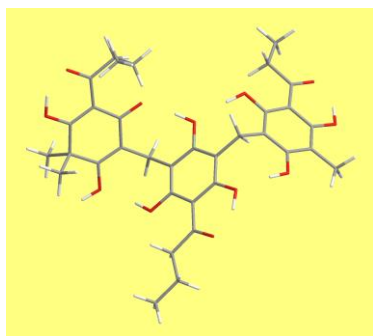

10

orientation of acyl groups: up—down—up  
monomers' conformer types: s-w—d-w—d-w

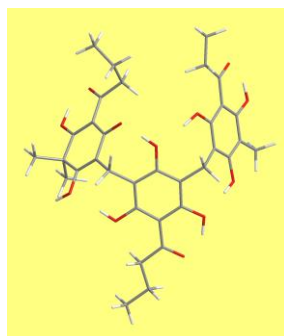

10-y

### Figure S 6

**Geometries and relative energies of the conformers of the calculated trimeric acylphloroglucinols in which one or two inward OHs *ortho* to the acyl group are replaced by keto O**

The conformers are visualized showing pairs of outstretched-shaped and half-bowl-shaped corresponding conformers. The acronym identifying the conformer is reported on the left under each image; the meaning of the numbers and letters used to build the acronyms is explained in section 3.1 and table S2 and illustrated in figure S5.

The relative energy values (kcal/mol, DFT/B3LYP/6-31+G(d,p) results) are reported centrally or centre-right under the conformers' images.

#### a) Structures in which the OH at C2 or C6'' is replaced by a keto O and no other OHs are replaced by other functions

##### Structure T7-KT6''-M5,3'',3''

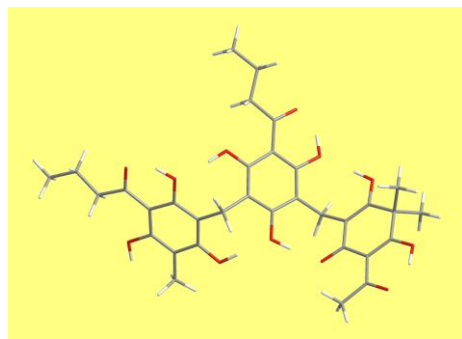

1

0.000

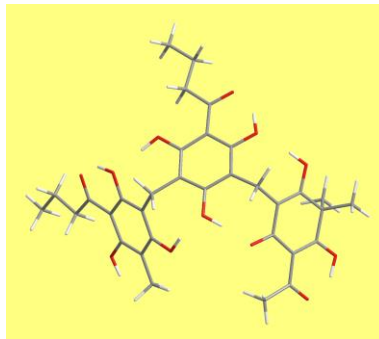

1-y

0.287

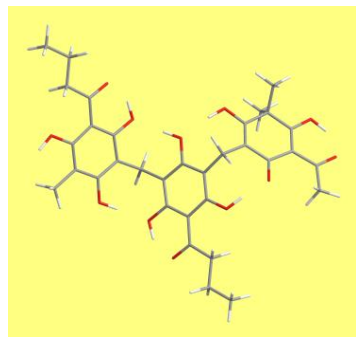

2

0.610

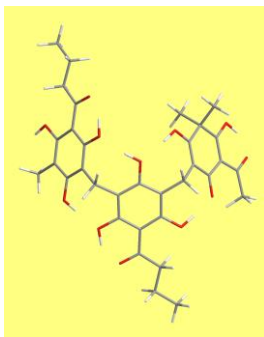

2-y

0.898

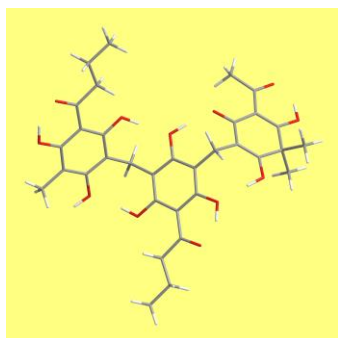

3 2.011

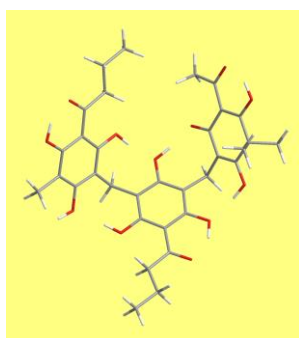

3-y 3.226

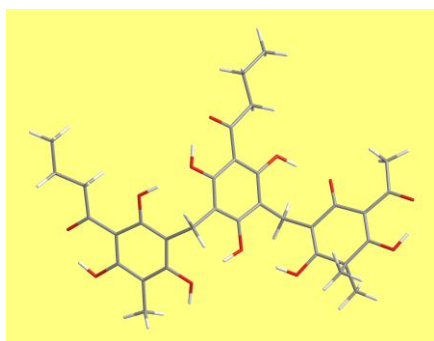

4 4.168

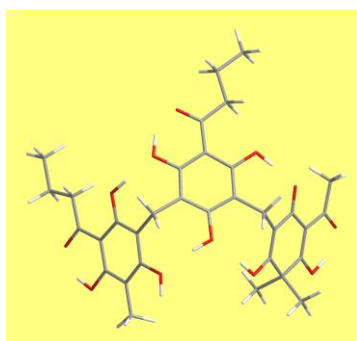

4-y 4.311

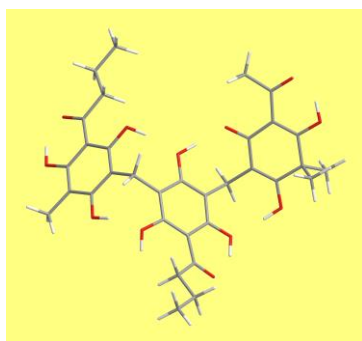

5 10.602

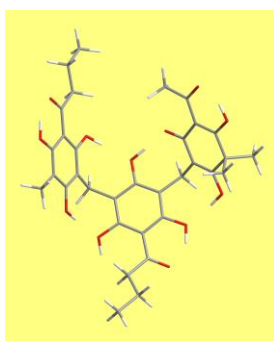

5-y 10.510

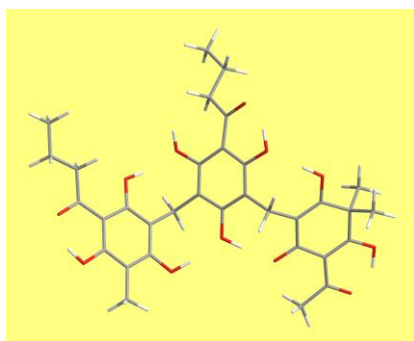

6 10.196

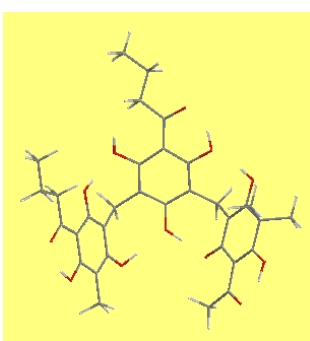

6-y 10.249

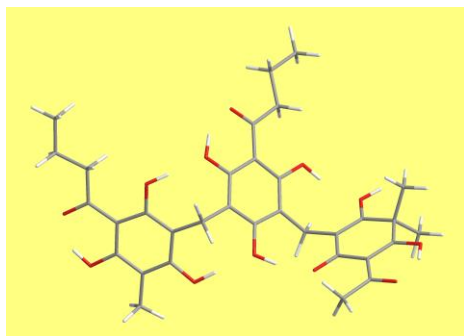

7 15.573

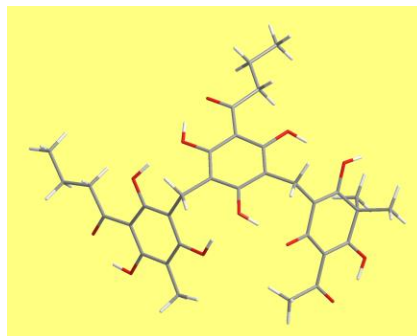

7-y 14.387

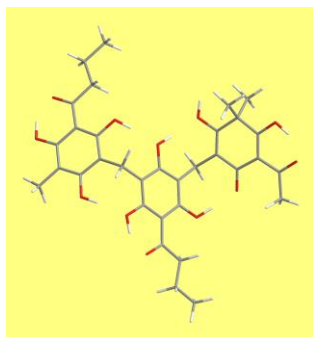

8 15.982

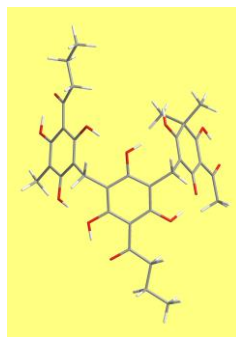

8-y 15.114

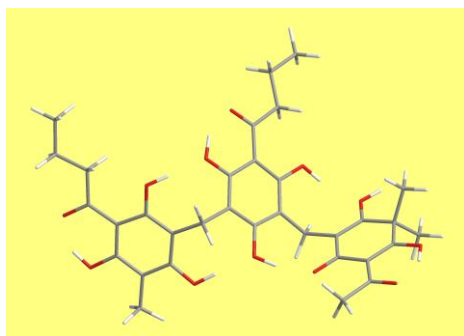

9 15.595

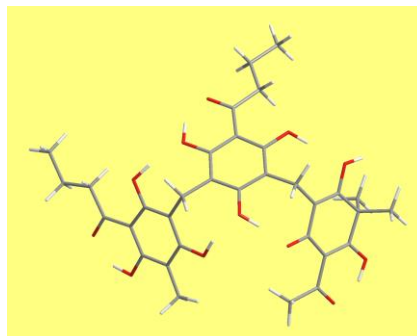

9-y 15.141

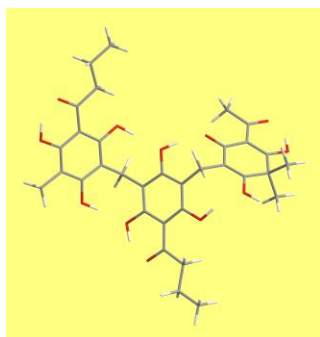

10 15.732

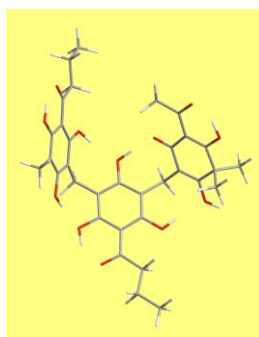

10-y 15.474

## Structure T8-KT6"-M5,3",3"

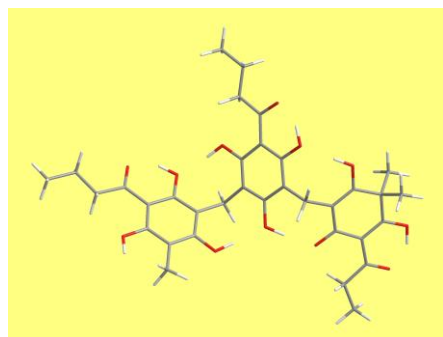

1 0.000

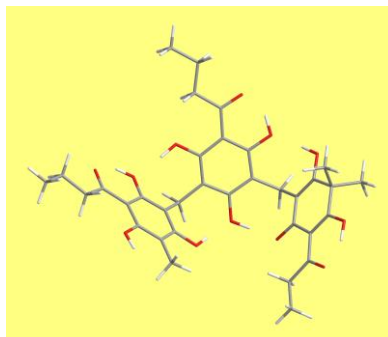

1-y 0.249

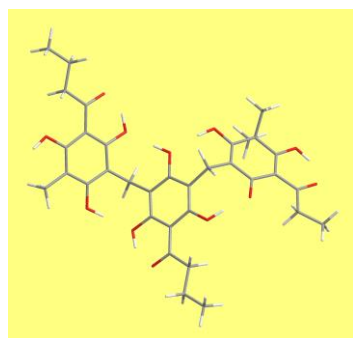

2 0.574

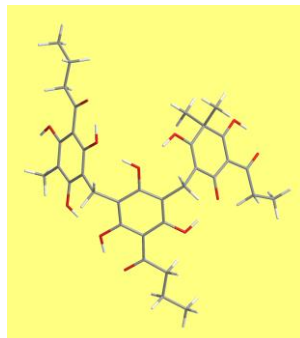

2-y 0.860

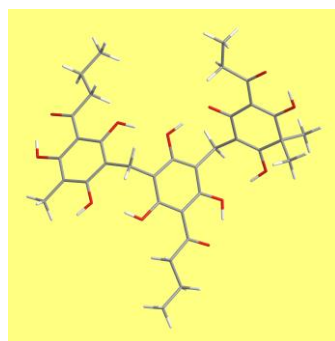

3 2.856

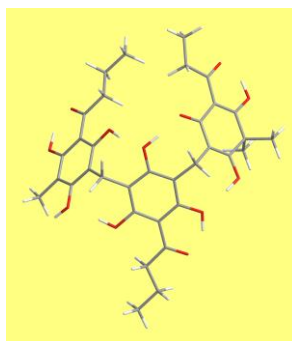

3-y 3.242

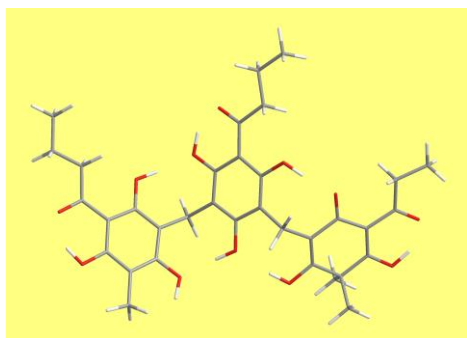

4

4.108

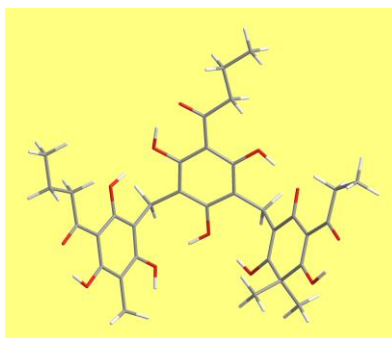

4-y

4.252

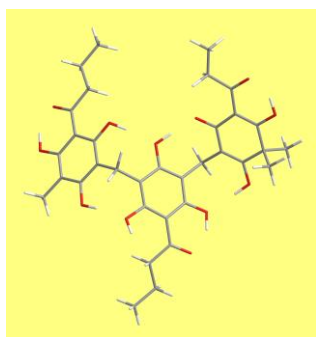

5

10.508

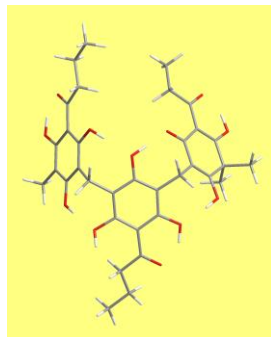

5-y

10.400

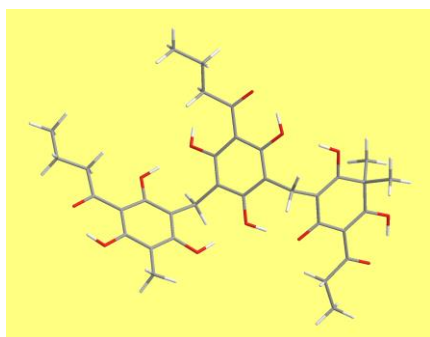

6

10.086

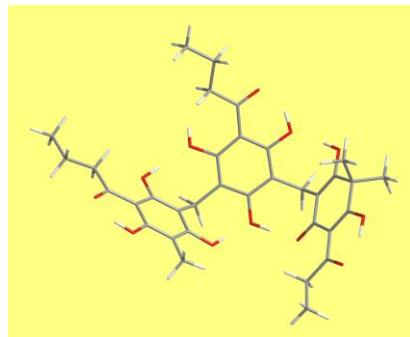

6-y

10.179

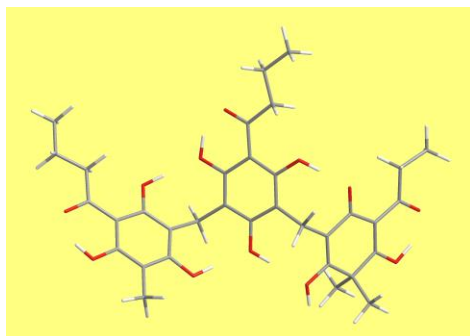

7

15.428

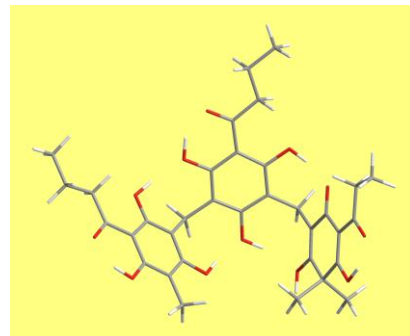

7-y

14.203



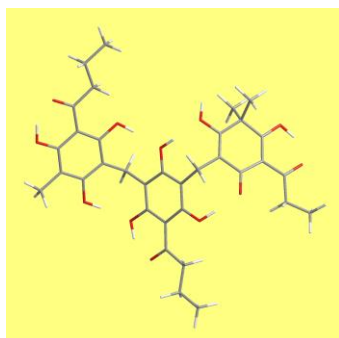

8 15.791

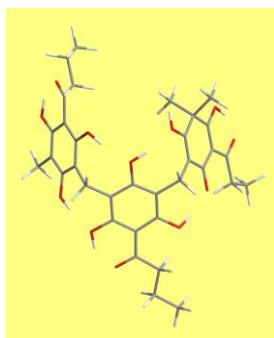

8-y 14.931

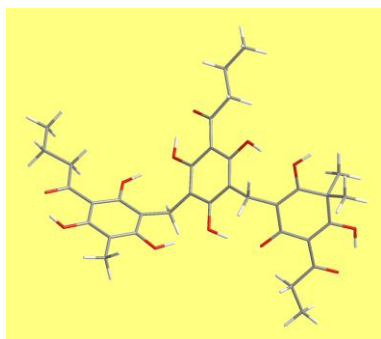

9 15.386

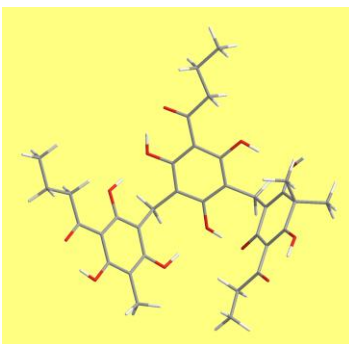

9-y 14.931

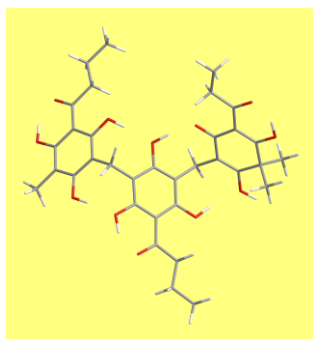

10 15.552

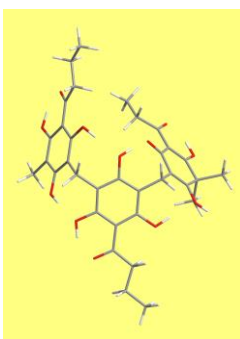

10-y 15.319

## Structure T8-KT2-M5,5,3"

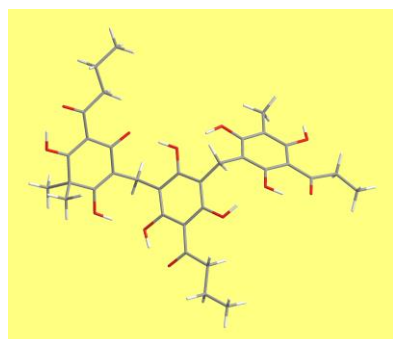

1 0.000

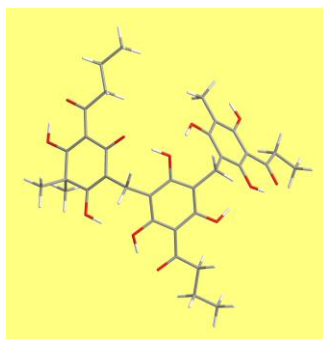

1-y 0.274

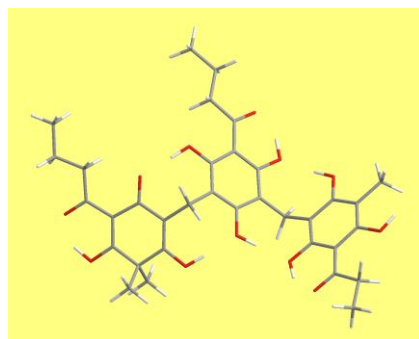

2 0.538

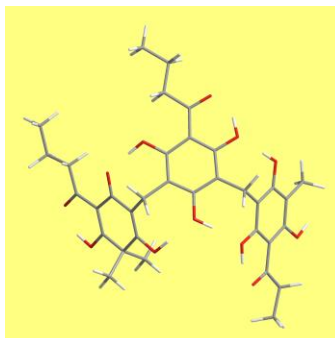

2-y 0.834

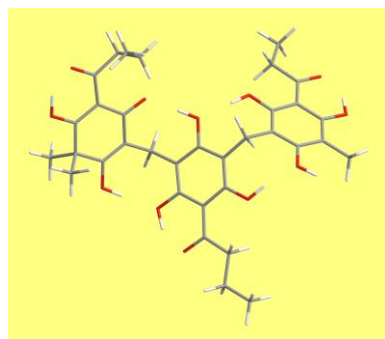

3 4.401

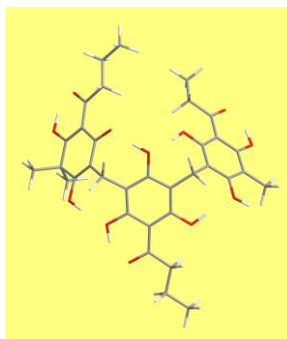

3-y 2.1883



4

4.039



4-y

4.135

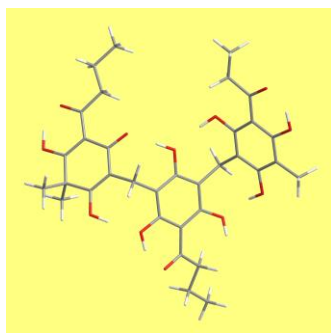

5

10.056

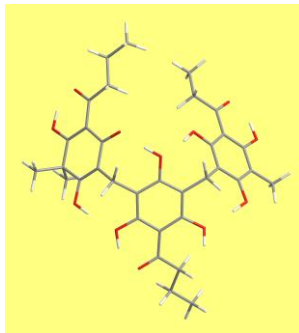

5-y

10.165

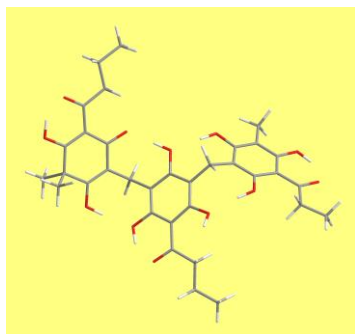

6

10.460

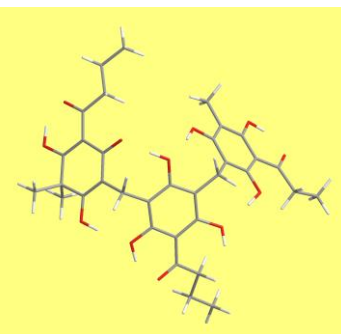

6-y

10.399

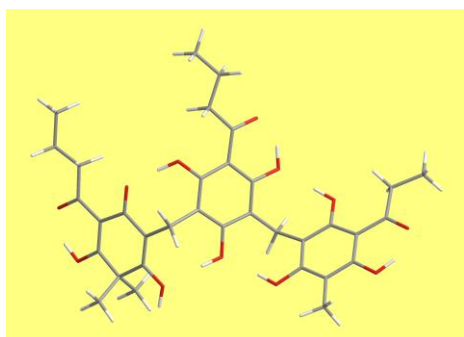

7

15.317

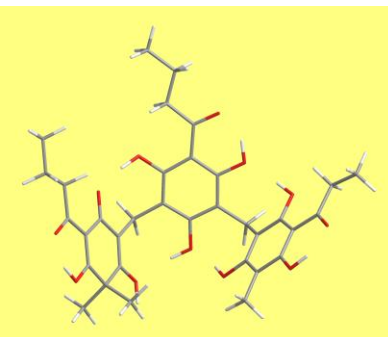

7-y

14.173

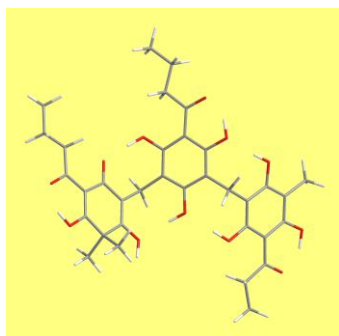

8 15.770

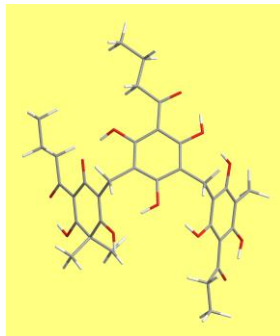

8-y 14.875

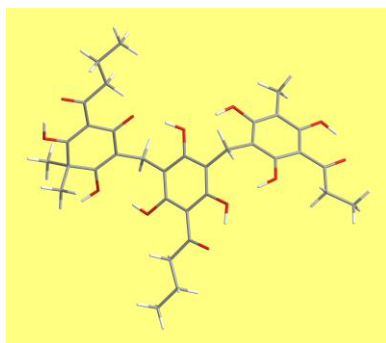

9 15.770

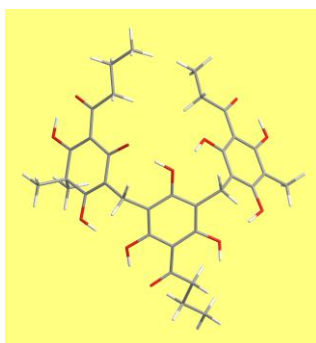

9-y 14.875

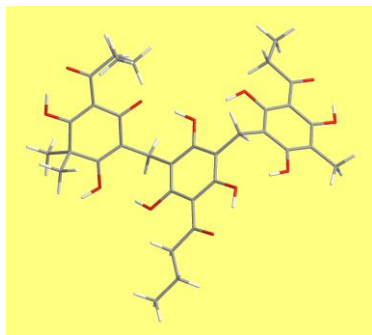

10 16.749

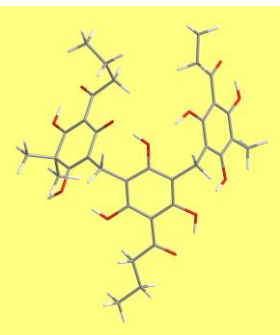

10-y 16.453

## Structure T9-KT6"-M5,3",3"

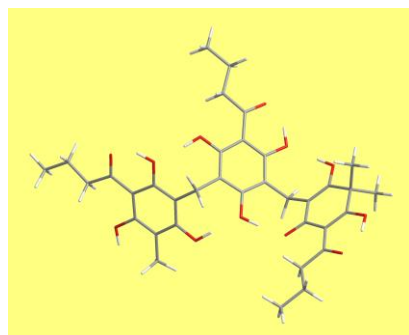

1 0.000

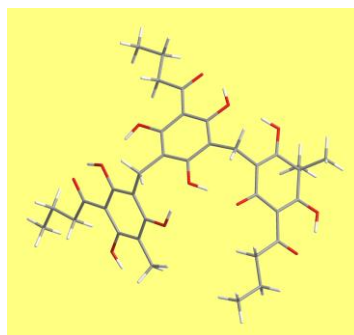

1-y 0.266

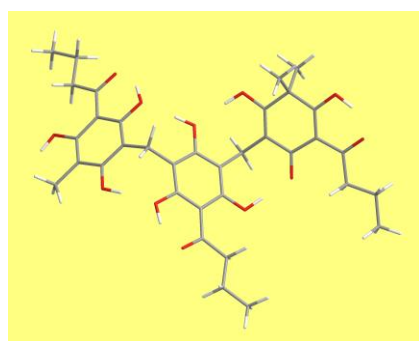

2 0.544

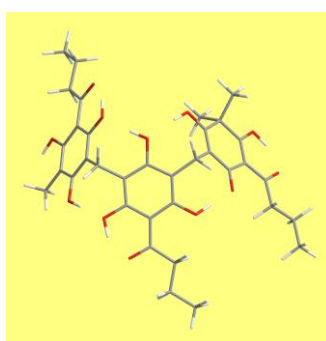

2-y 0.868

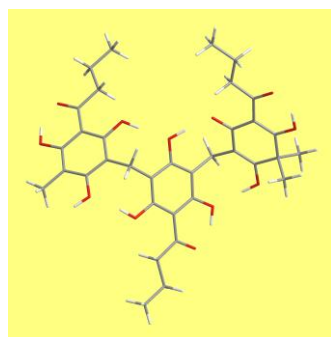

3 2.853

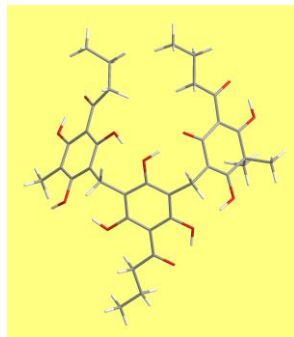

3-y 4.268

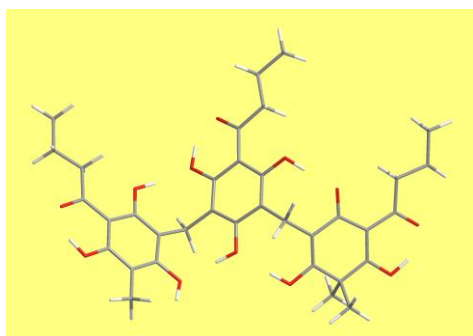

4 4.070

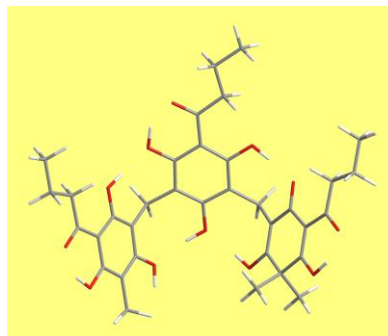

4-y 4.210

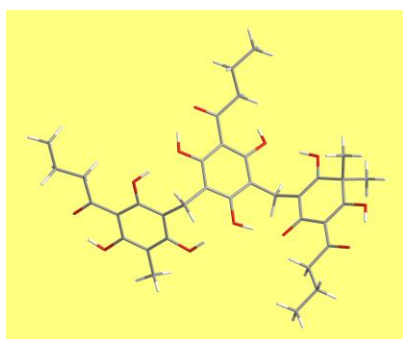

5 11.948

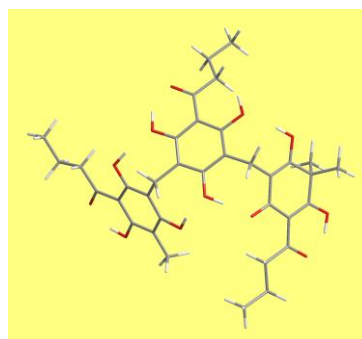

5-y 11.730

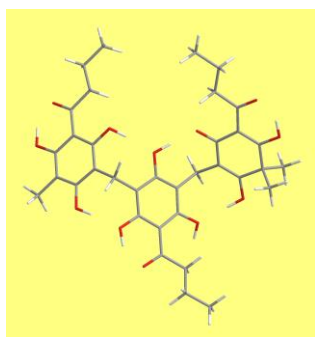

6 11.914

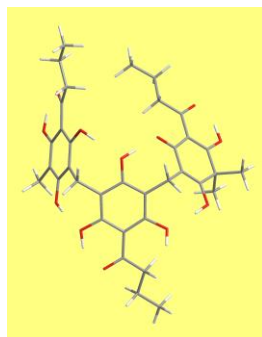

6-y 12.251

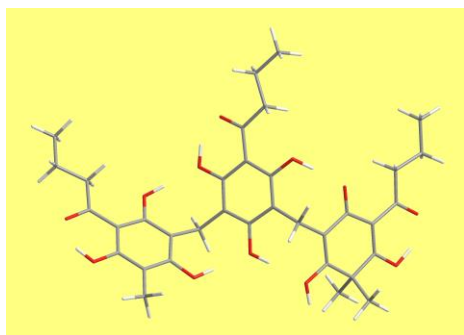

7 15.391

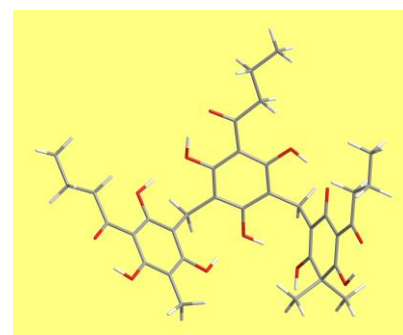

7-y 14.162

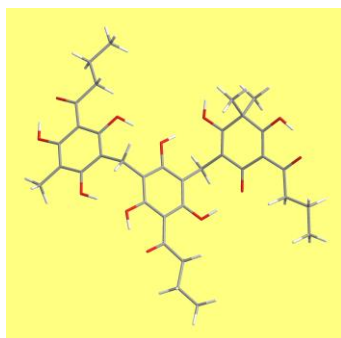

8 15.794

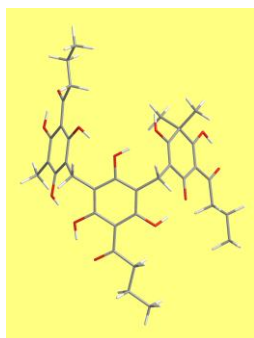

8-y 14.899

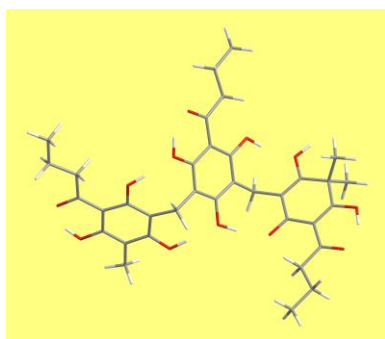

9 15.349

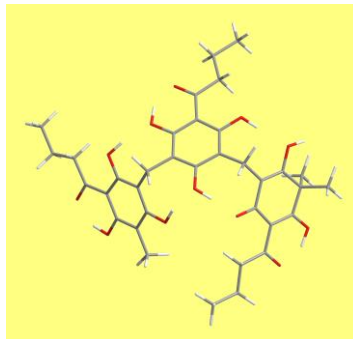

9-y 14.865

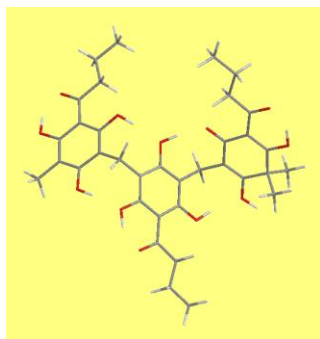

10 15.465

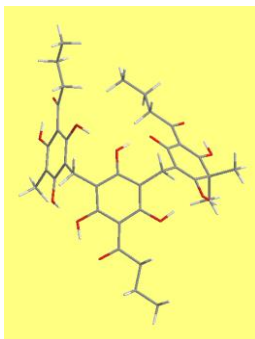

10-y 15.949

## Structure T12-KT6"-M5,3",3"

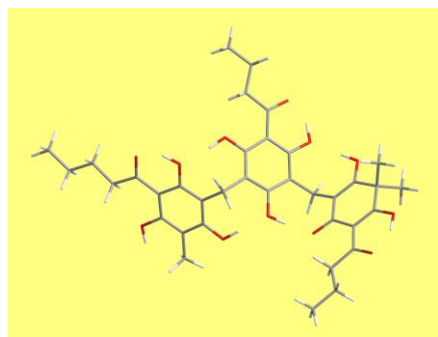

1 0.000

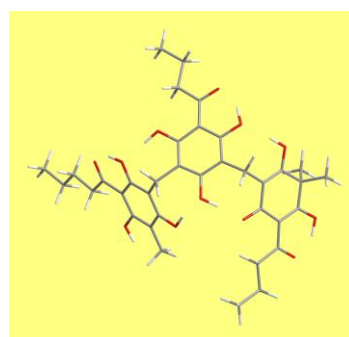

1-y 0.267

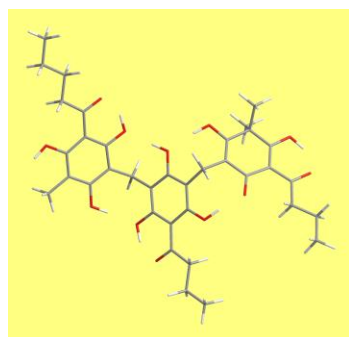

2 0.581

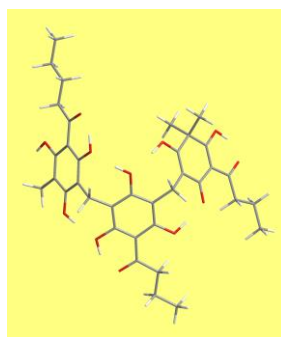

2-y 0.869

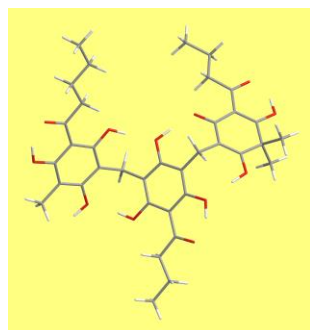

3 2.865

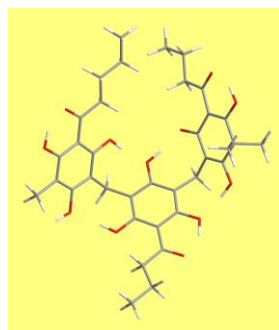

3-y 3.260



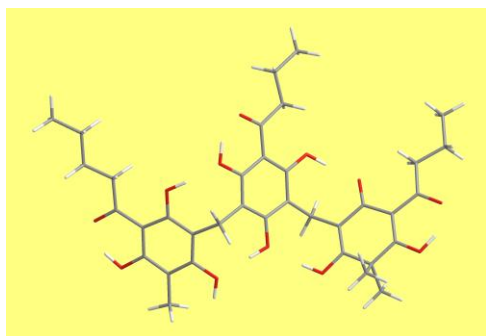

4

4.079

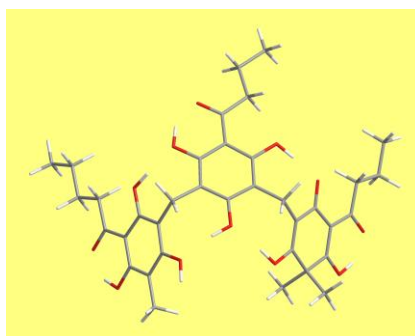

4-y

4.255

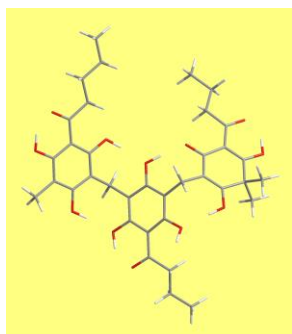

5

11.971

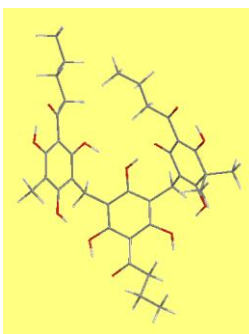

5-y

11.793

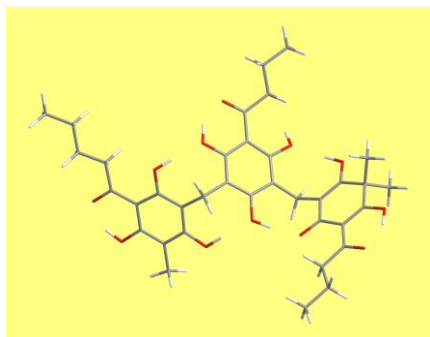

6

11.947

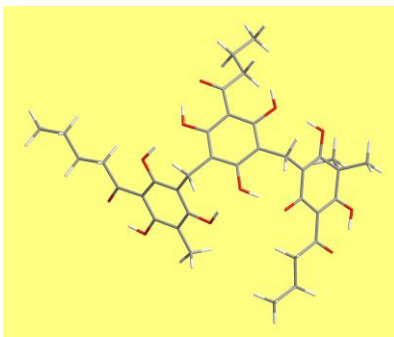

6-y

12.262

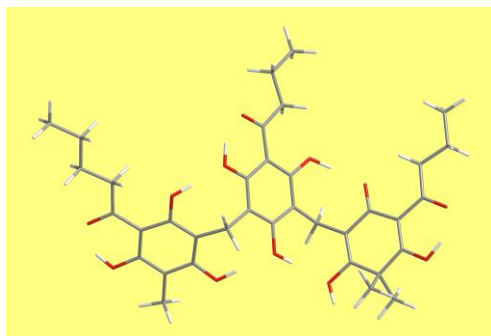

7 15.415

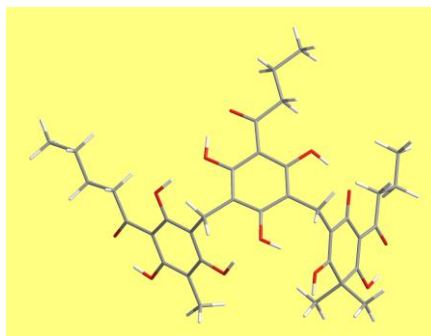

7-y 14.205

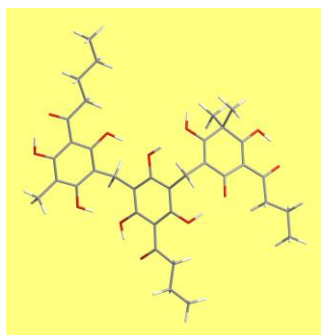

8 15.813

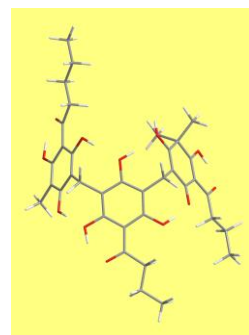

8-y 14.916

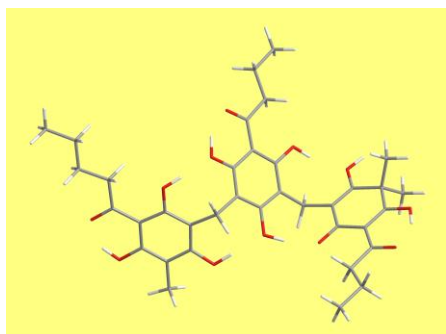

9 15.371

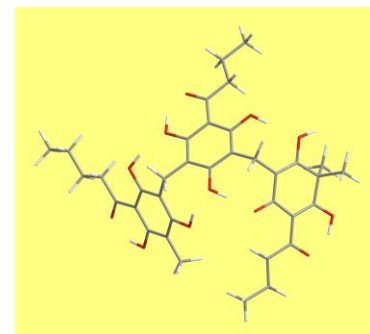

9-y 14.928

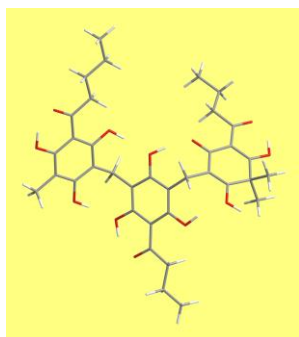

10 15.549

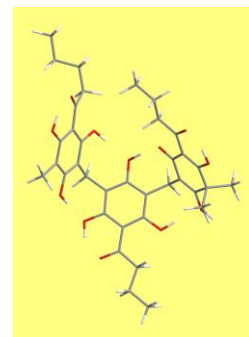

10-y 15.831

## Structure T12-KT2-M5,5,3"

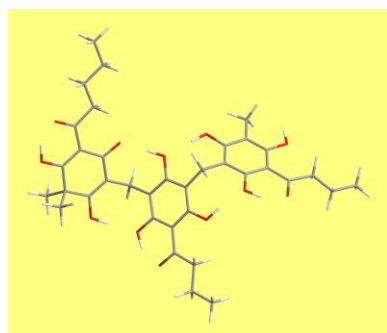

1 0.000

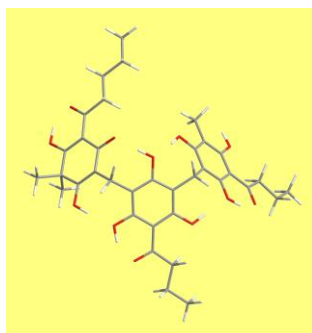

1-y 0.272

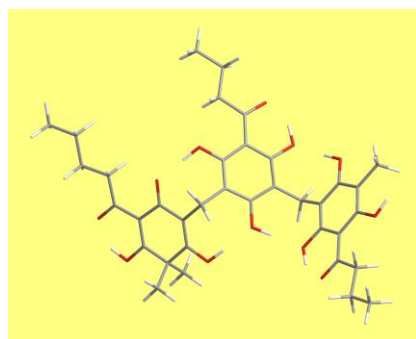

2 0.575

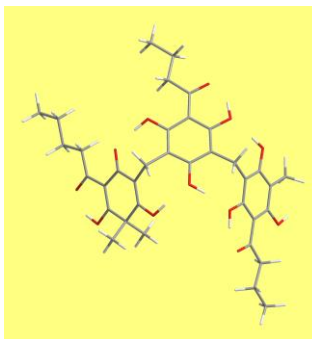

2-a-y 0.865

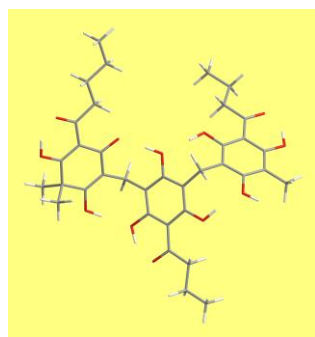

3 2.851

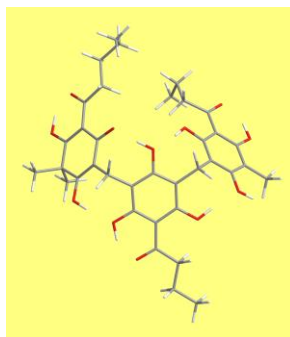

3-y 4.590

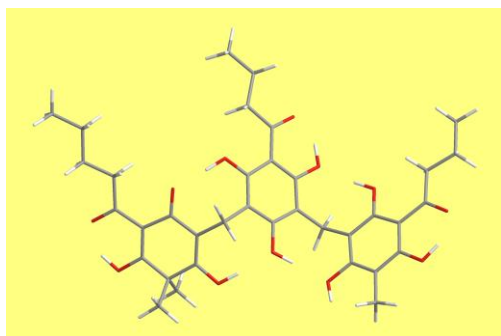

4

4.107

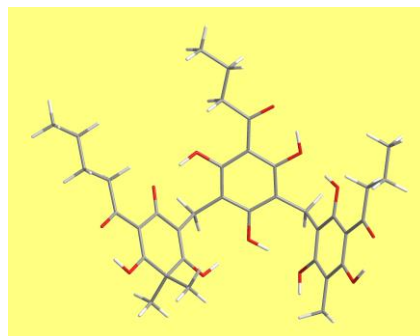

4-y

4.238

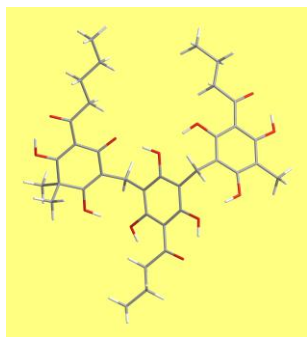

5

11.904

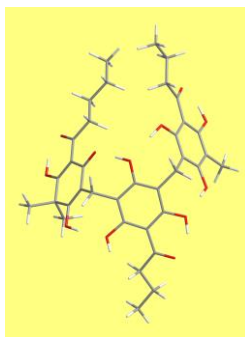

5-y

12.232

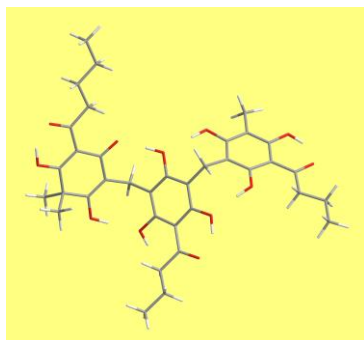

6

11.926

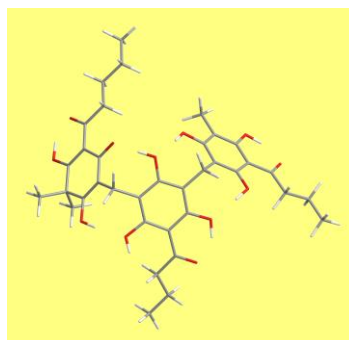

6y

11.904

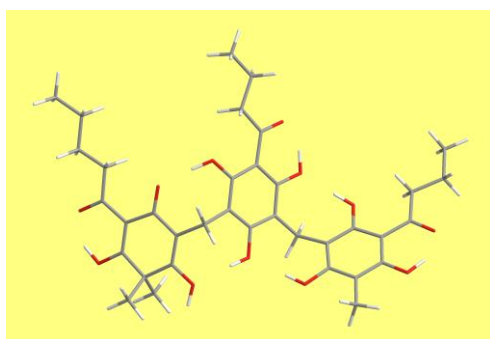

7

15.360

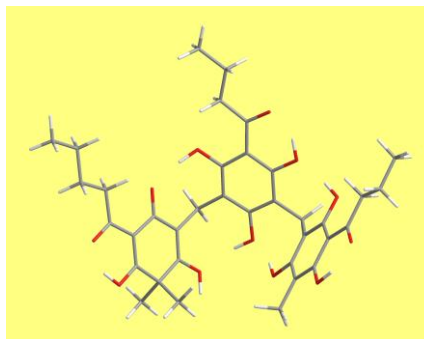

7-y

14.154

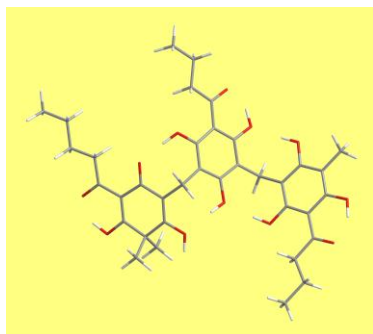

8 15.761

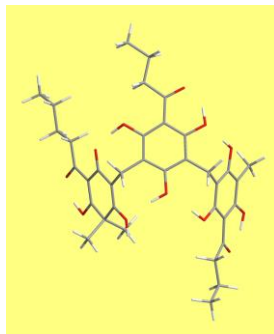

8-y 14.876

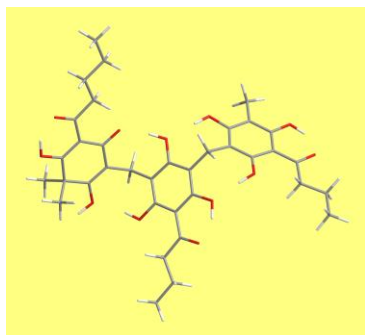

9 13.534

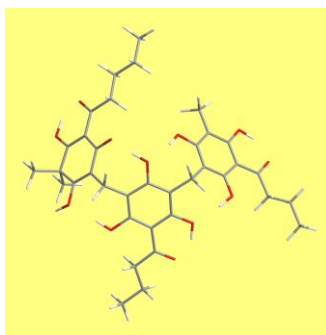

9-y 12.856

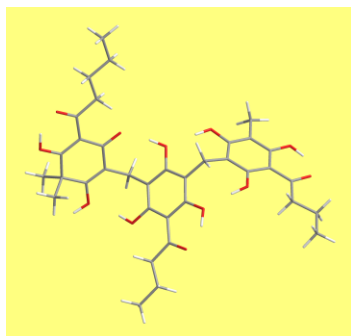

10 15.439

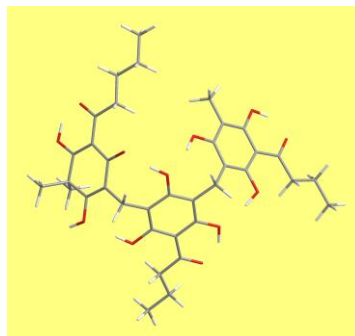

10-y 15.507

- b) Structures in which the OH at C6'' is replaced by a keto O and one or more other OHs are replaced by OCH<sub>3</sub> groups

**Structure T5-KT6''-M3'',3''-ET4**

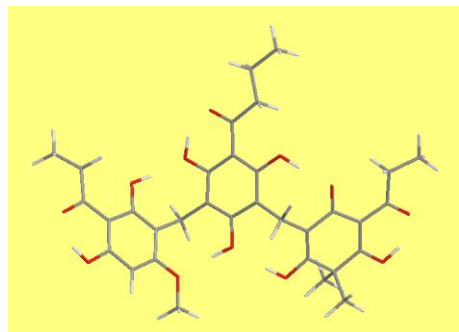

1

0.000

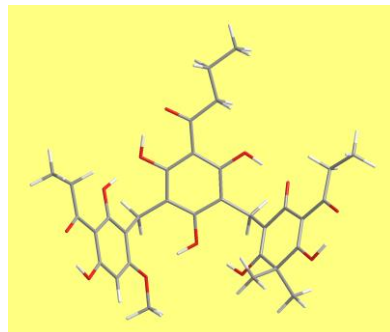

1-y

0.086

**Structure T9-KT6''-M3'',3''-ET4**

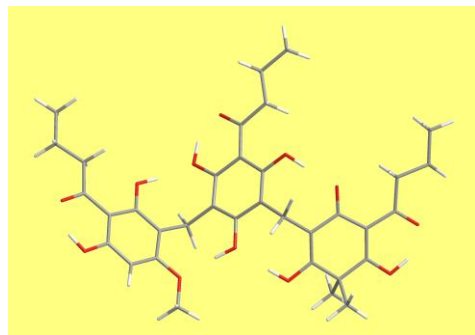

1

0.000

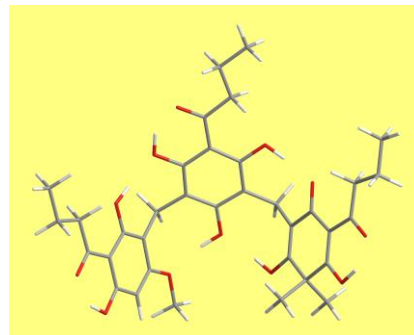

1-y

0.085

## Structure T9-KT6"-M5,3",3"-ET6

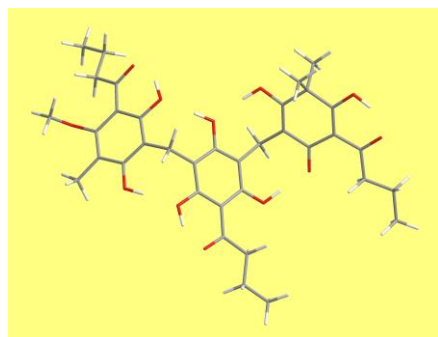

1 0.000

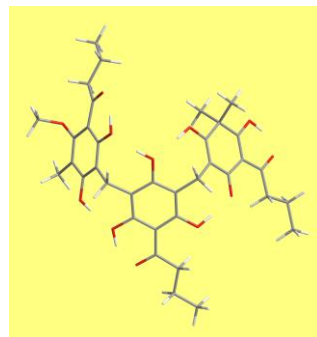

1-y 0.530

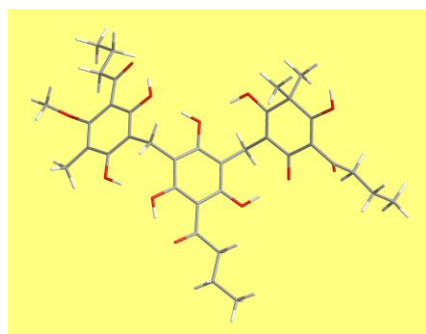

40<sup>a</sup> 18.045

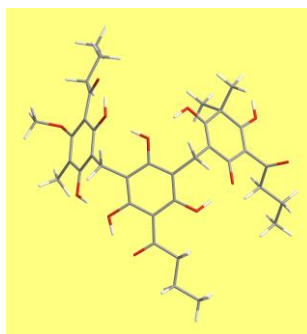

40-y 18.364

<sup>a</sup>) Number given arbitrarily to high energy conformers in which one of the first IHBs is not present.

c) Structures in which the OHs at C2 and C6'' are both replaced by keto O

**Structure T2-KT2,6''-M5,5,3'',3''**

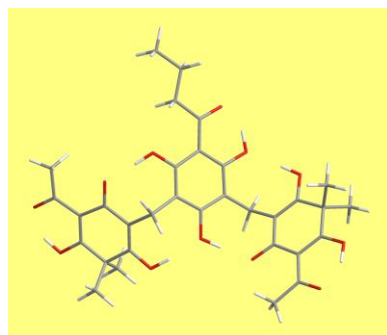

1 0.000

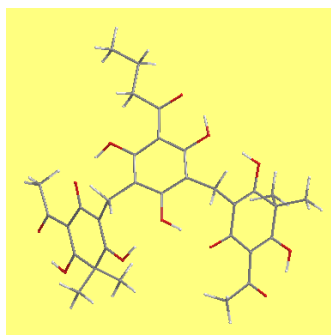

1-y 0.385

**Structure T4-KT2,6''-M5,5,3'',3''**

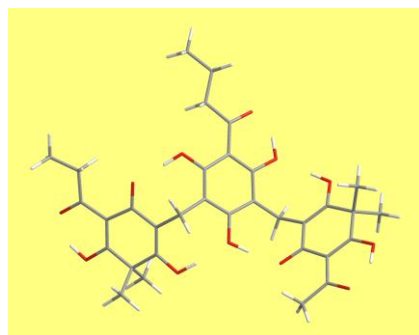

1 0.000

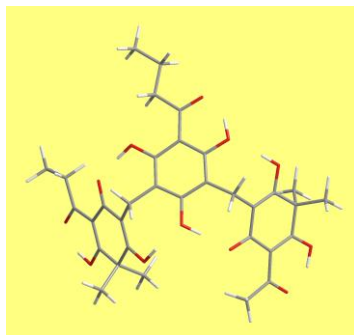

1-y 0.383



### Structure T5-KT2,6''-M5,5,3'',3''

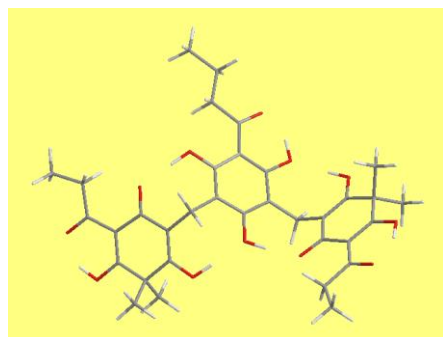

1 0.000

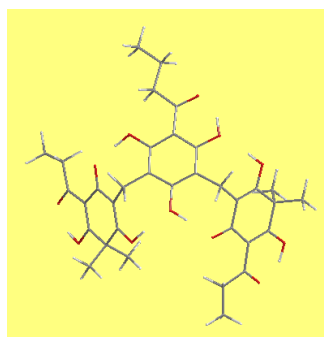

1-y 0.370

### Structure T7-KT2,6''-M5,5,3'',3''

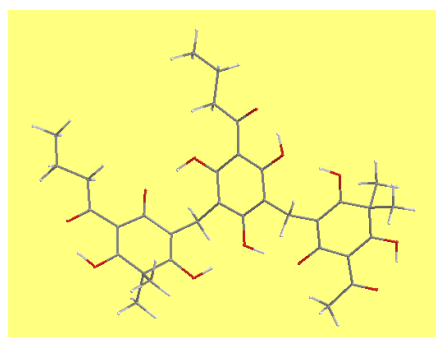

1 0.000

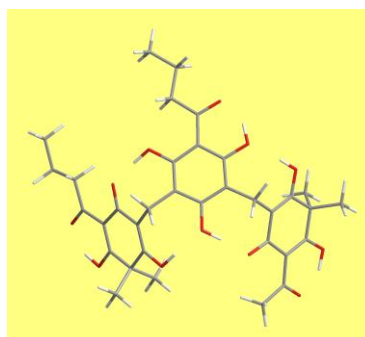

1-y 0.384

### Structure T8-KT2,6''-M5,5,3'',3''

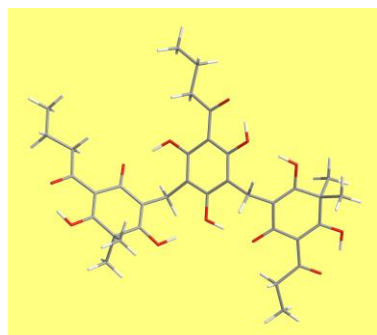

1 0.000

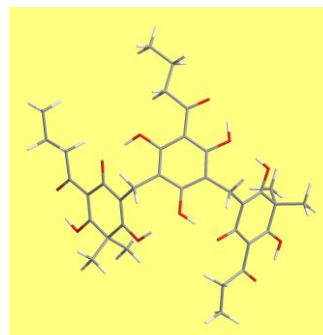

1-y 0.373

### Structure T9-KT2,6''-M5,5,3'',3''

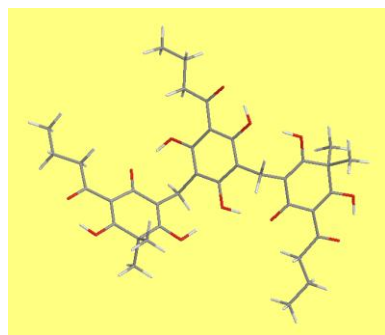

1 0.000

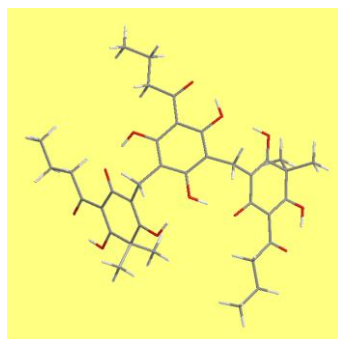

1-y 0.380

### Structure T10-KT2,6''-M5,5,3'',3''

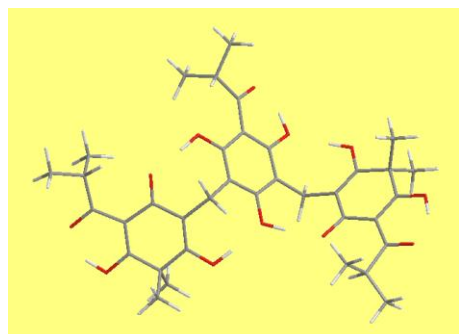

1 0.000

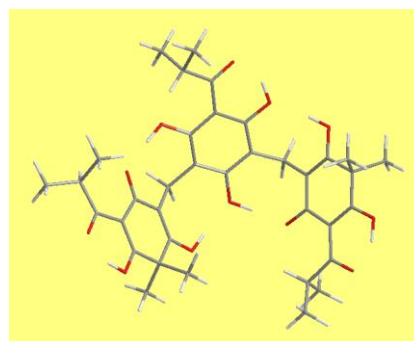

1-y 0.587

### Figure S 7

**Visualization of relevant trends of the lowering effect of Grimme's correction on the estimation of the energy of the conformers of the calculated trimeric acylphloroglucinols.**

The values of this effect (kcal/mol, reported in table S6) pertain to the vertical axis of the graphs.

**a) Molecules in which no OH group is replaced by other functions.**

In this case, the numbers on the horizontal axis denote the pairs of conformers, as indicated in table S6. For each pair, the blue line refers to the outstretched-shape conformer and the brown line to the half-bowl-shaped conformer.

**a) 1) conformers of the T1 molecule**

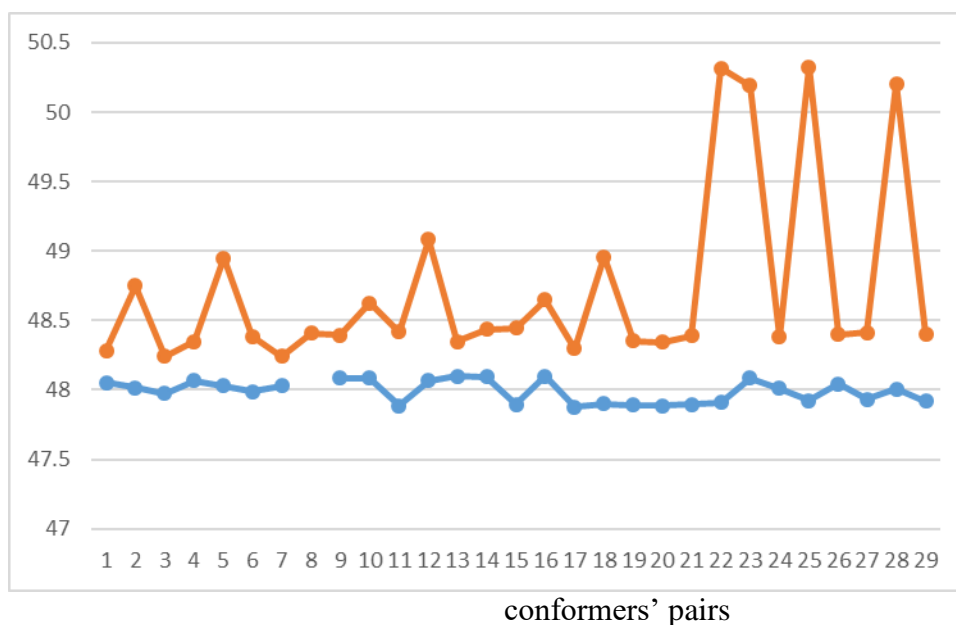

**a) 2) conformers of the T7 molecule**

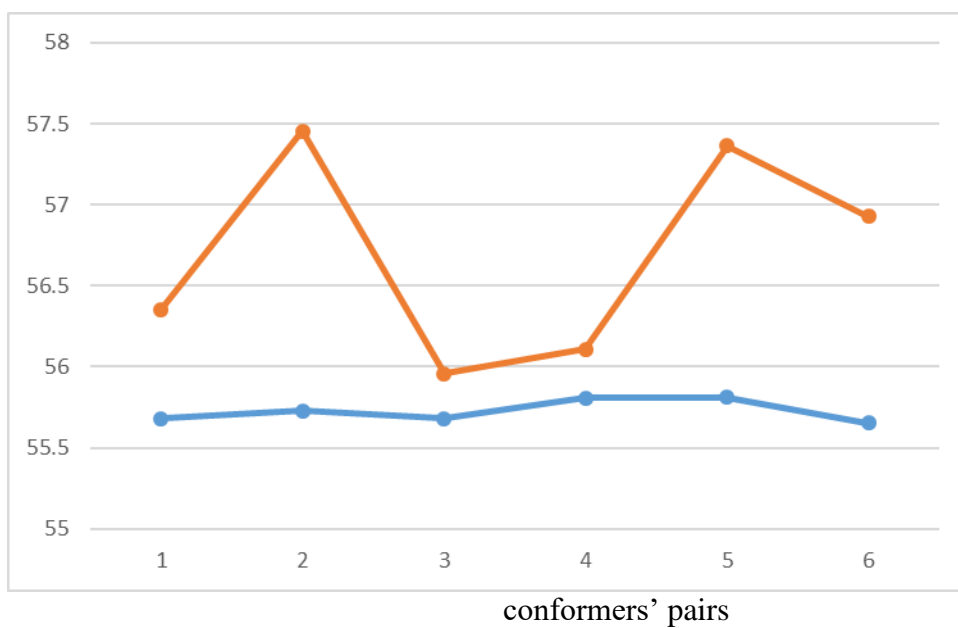

**a) 3) conformers of the T9 molecule**

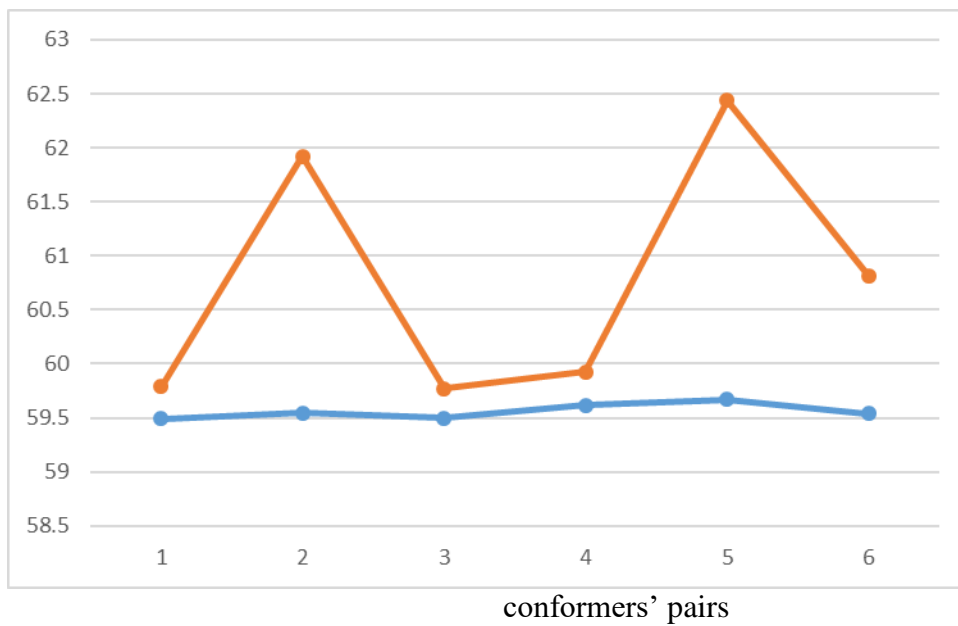

**a) 4) conformers of the T9- M5,3" molecule**

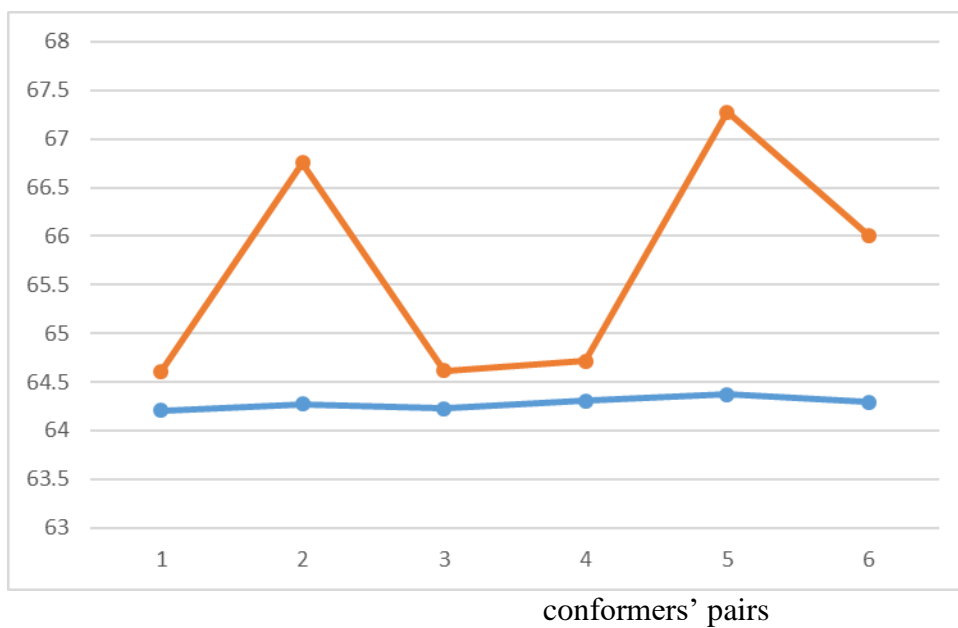

**a) 5) conformers of the T10 molecule**

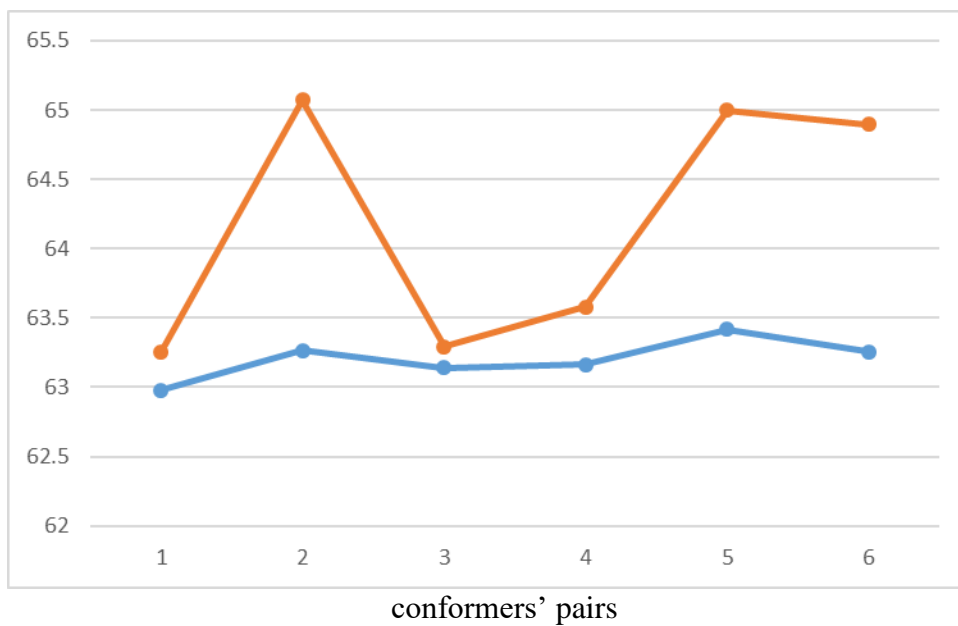

**b) Molecules in which an OH group ortho to the acyl group is replaced by a keto O in one of the outer monomers**

In this case, the numbers on the horizontal axis denote the pairs of conformers, as indicated in table S6. For each pair, the blue line refers to the outstretched-shape conformer and the brown line to the half-bowl-shaped conformer.

**b) 1) conformers of the T7-KT6"-M5,3",3" molecule**

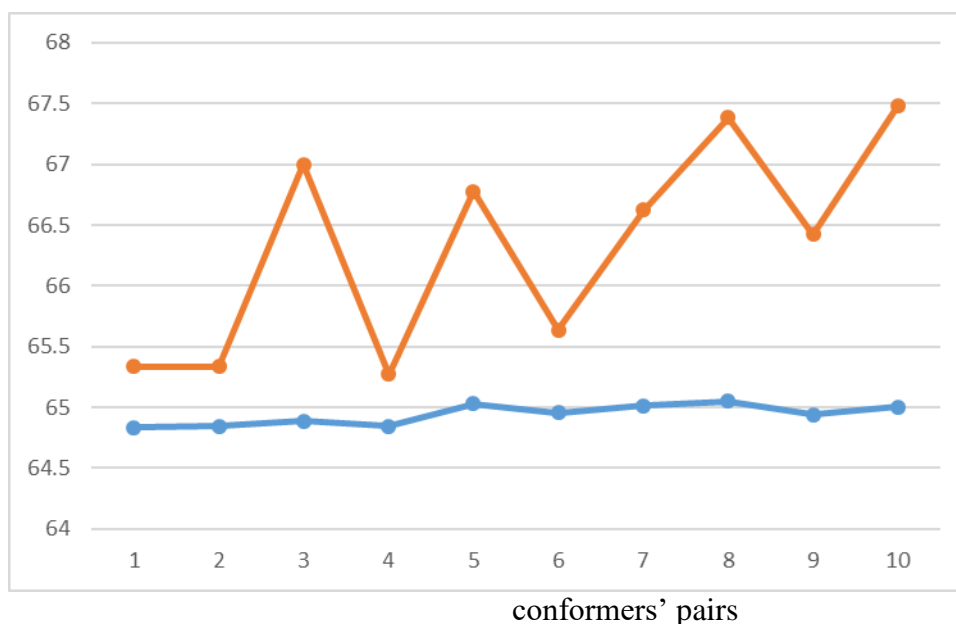

**b) 2) conformers of the T8-KT6''-M5,3'',3'' molecule**

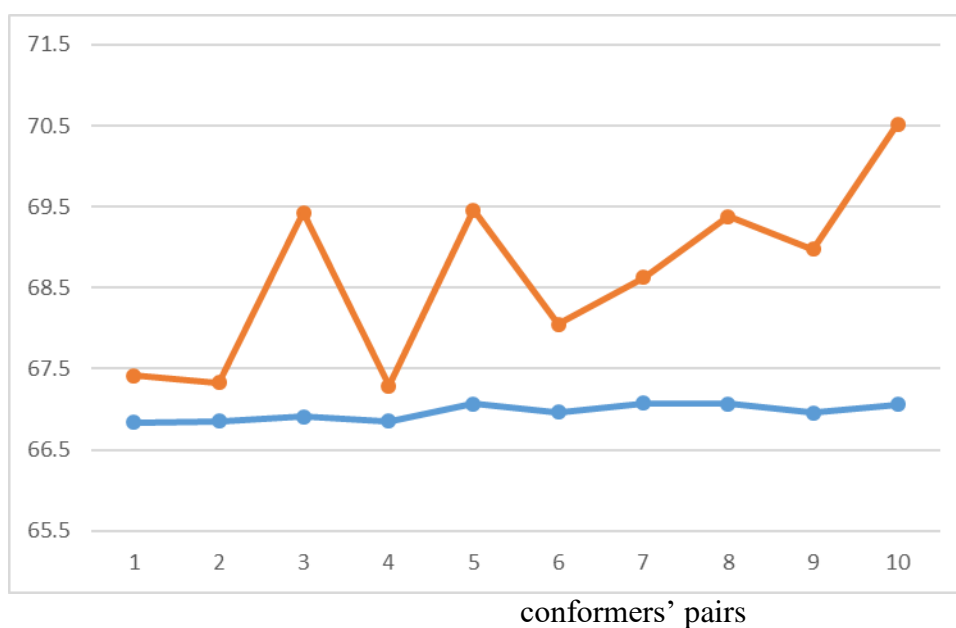

**b) 3) conformers of the T8-KT2-M5,5,3" molecule**

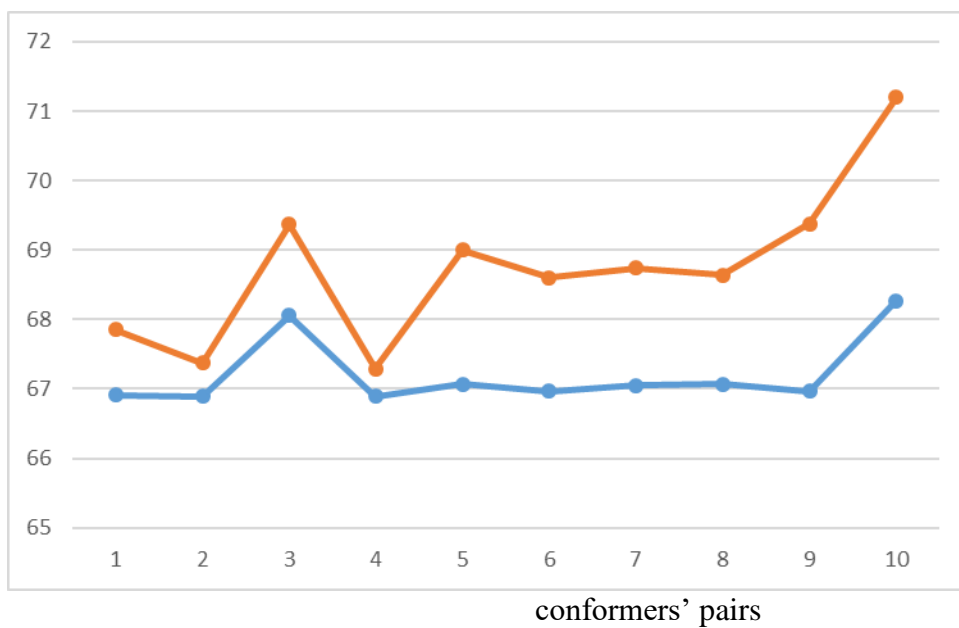

**b) 4) conformers of the T9-KT6"-M5,3",3" molecule**

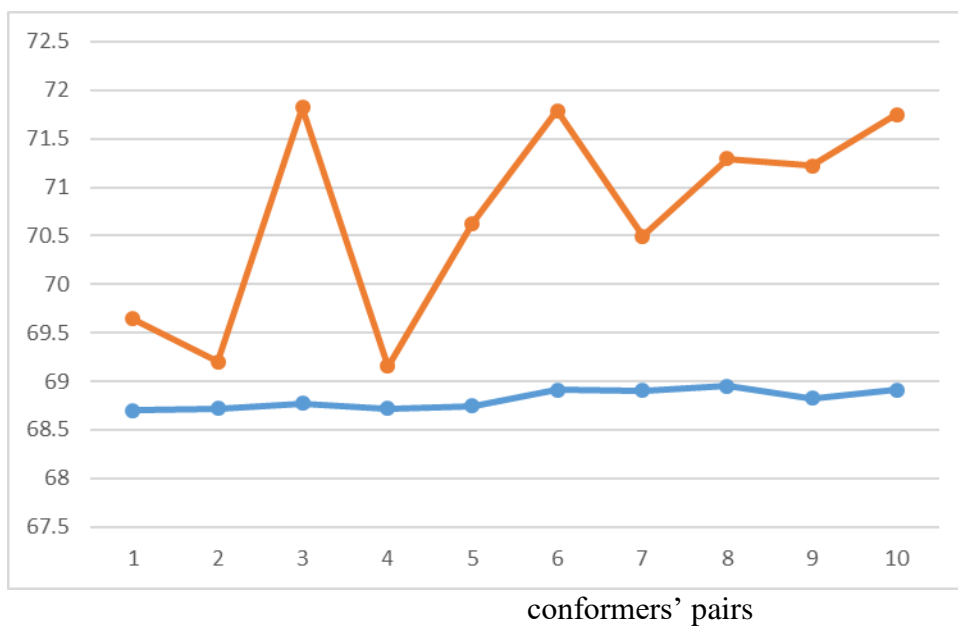

**b) 5) conformers of the T12-KT2-M5,5,3" molecule**

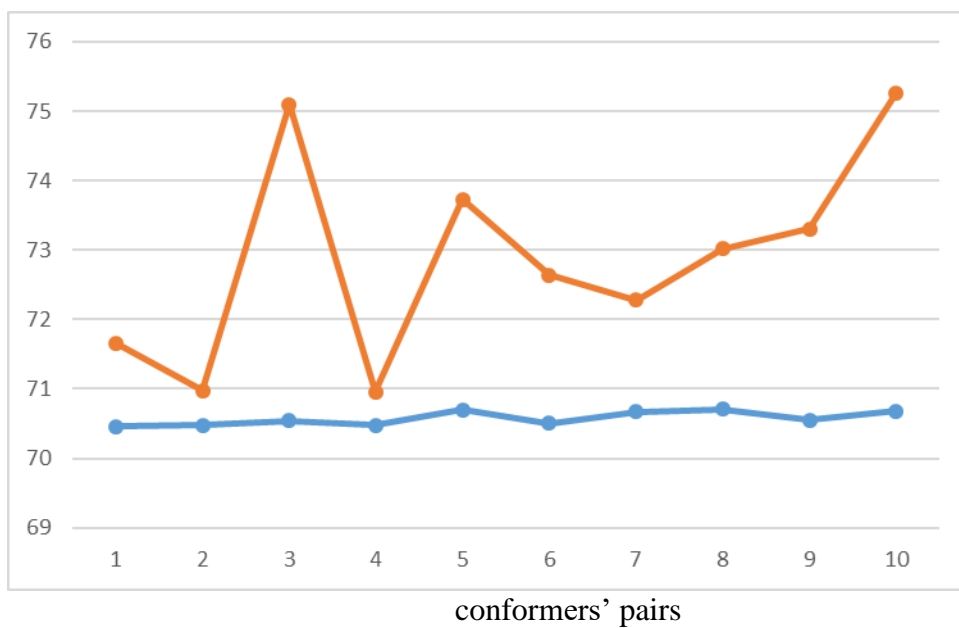

**b) 6) conformers of the T12-KT6"-M5,3",3" molecule**

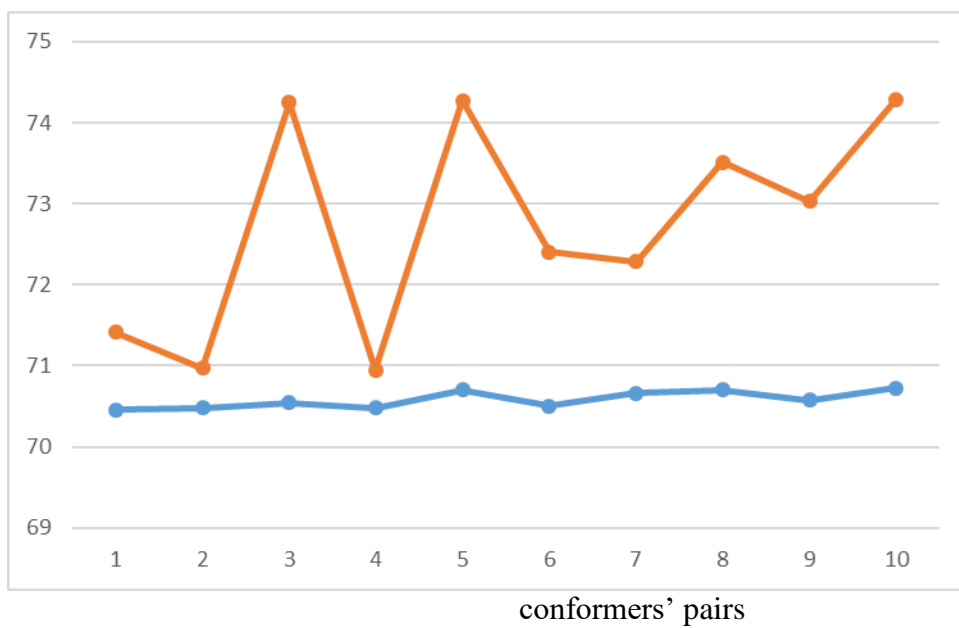



c) **Molecules in which the inward OH group ortho to the acyl group is replaced by a keto O in each of the outer monomers**

In this case, there is only one pair of conformers for each molecule. The numbers on the horizontal axis denote the molecules as indicated in the table below. For each molecule, the blue line refers to the outstretched-shape conformer and the brown line to the half-bowl-shaped conformer.

| molecule                | number denoting it on the x axis | molecule                 | number denoting it on the x axis |
|-------------------------|----------------------------------|--------------------------|----------------------------------|
| T2-KT2,6''-M5,5,3'',3'' | 1                                | T8-KT2,6''-M5,5,3'',3''  | 5                                |
| T4-KT2,6''-M5,5,3'',3'' | 2                                | T9-KT2,6''-M5,5,3'',3''  | 6                                |
| T5-KT2,6''-M5,5,3'',3'' | 3                                | T10-KT2,6''-M5,5,3'',3'' | 7                                |
| T7-KT2,6''-M5,5,3'',3'' | 4                                |                          |                                  |

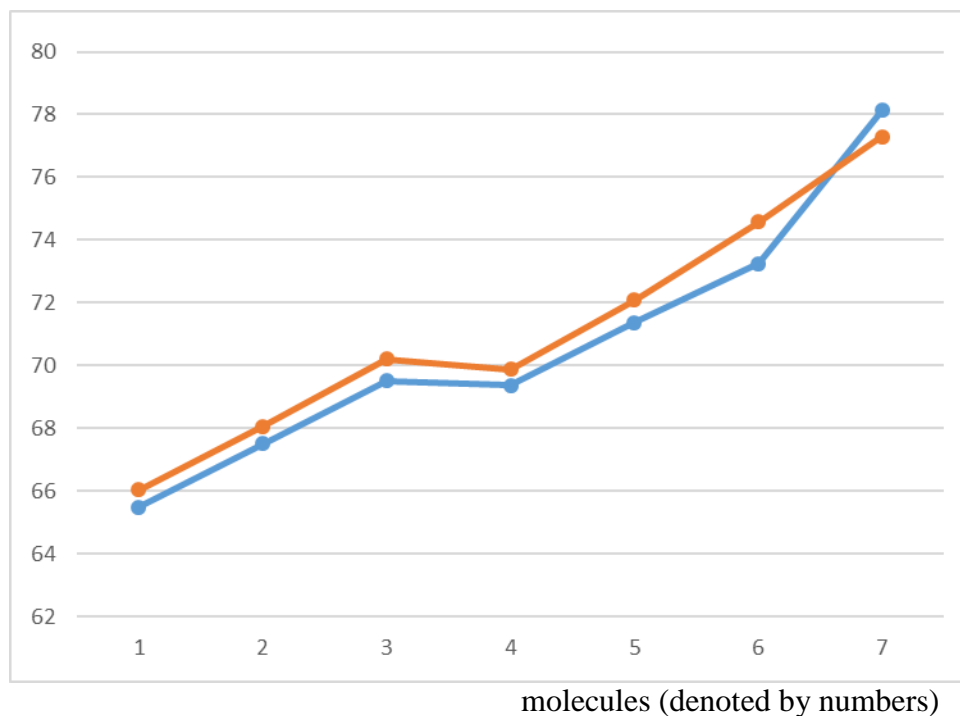

d) **Molecules in which the OH groups at C6 and at C2'' are replaced by OCH<sub>3</sub> ether groups**

In this case, there is only one pair of conformers for each molecule. The numbers on the horizontal axis denote the molecules as indicated in the table below. For each molecule, the blue line refers to the outstretched-shape conformer and the brown line to the half-bowl-shaped conformer.

| molecule          | number denoting it on the x axis | molecule           | number denoting it on the x axis |
|-------------------|----------------------------------|--------------------|----------------------------------|
| T3-ET6,2''        | 1                                | T10-M5,3''-ET6,2'' | 8                                |
| T3-M5,3''-ET6,2'' | 2                                | T11-ET6,2''        | 9                                |
| T7-ET6,2''        | 3                                | T11-M5,3''-ET6,2'' | 10                               |
| T7-M5,3''-ET6,2'' | 4                                | T13-ET6,2''        | 11                               |
| T9-ET6,2''        | 5                                | T13-M5,3''-ET6,2'' | 12                               |
| T9-M5,3''-ET6,2'' | 6                                | T14-ET6,2''        | 13                               |
| T10-ET6,2''       | 7                                | T14-M5,3''-ET6,2'' | 14                               |

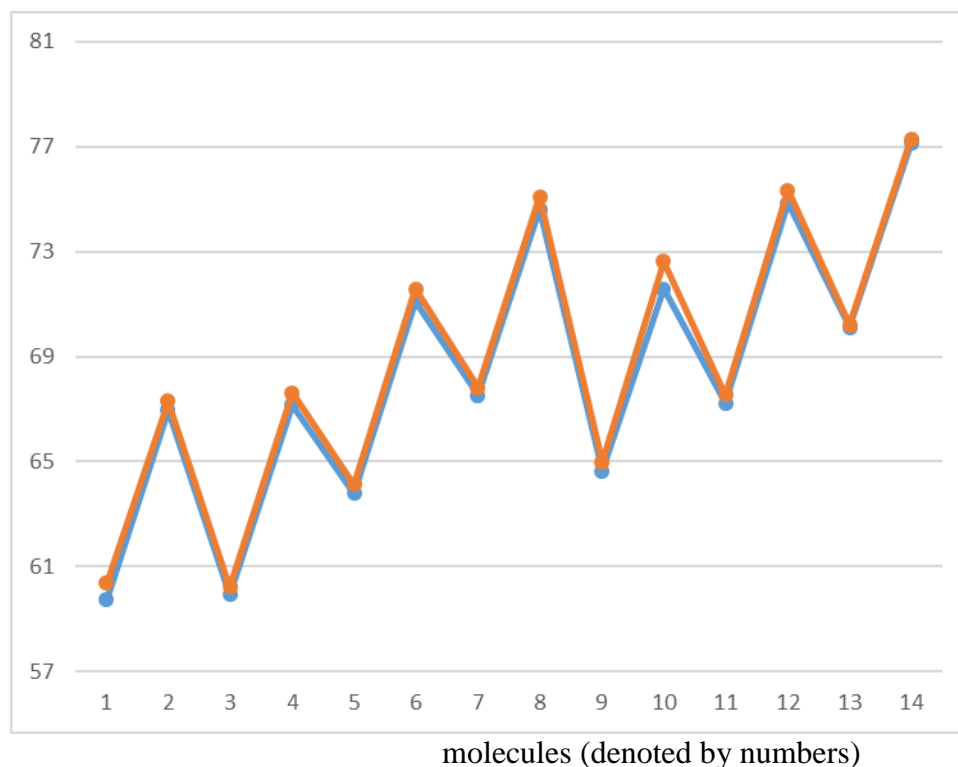

e) **Trend in terms of the molecular formulas**

The diagram considers the smallest value of the dispersion-related energy decrease among the calculated T-ACPL molecules having the same molecular formula (table S 7). The numbers on the horizontal axis correspond to the molecular formulas as indicated in the table below. For each selection, the blue line refers to the outstretched-shape conformer and the brown line to the half-bowl-shaped conformer.

| number on the x axis | molecular formula                               | molecular mass (a.m.u) | number on the x axis | molecular formula                               | molecular mass (a.m.u) |
|----------------------|-------------------------------------------------|------------------------|----------------------|-------------------------------------------------|------------------------|
| 1                    | C <sub>26</sub> H <sub>24</sub> O <sub>12</sub> | 528                    | 6                    | C <sub>34</sub> H <sub>40</sub> O <sub>12</sub> | 640                    |
| 2                    | C <sub>30</sub> H <sub>32</sub> O <sub>12</sub> | 584                    | 7                    | C <sub>35</sub> H <sub>42</sub> O <sub>12</sub> | 654                    |
| 3                    | C <sub>31</sub> H <sub>34</sub> O <sub>12</sub> | 598                    | 8                    | C <sub>36</sub> H <sub>44</sub> O <sub>12</sub> | 668                    |
| 4                    | C <sub>32</sub> H <sub>36</sub> O <sub>12</sub> | 612                    | 9                    | C <sub>37</sub> H <sub>46</sub> O <sub>12</sub> | 682                    |
| 5                    | C <sub>33</sub> H <sub>38</sub> O <sub>12</sub> | 626                    |                      |                                                 |                        |

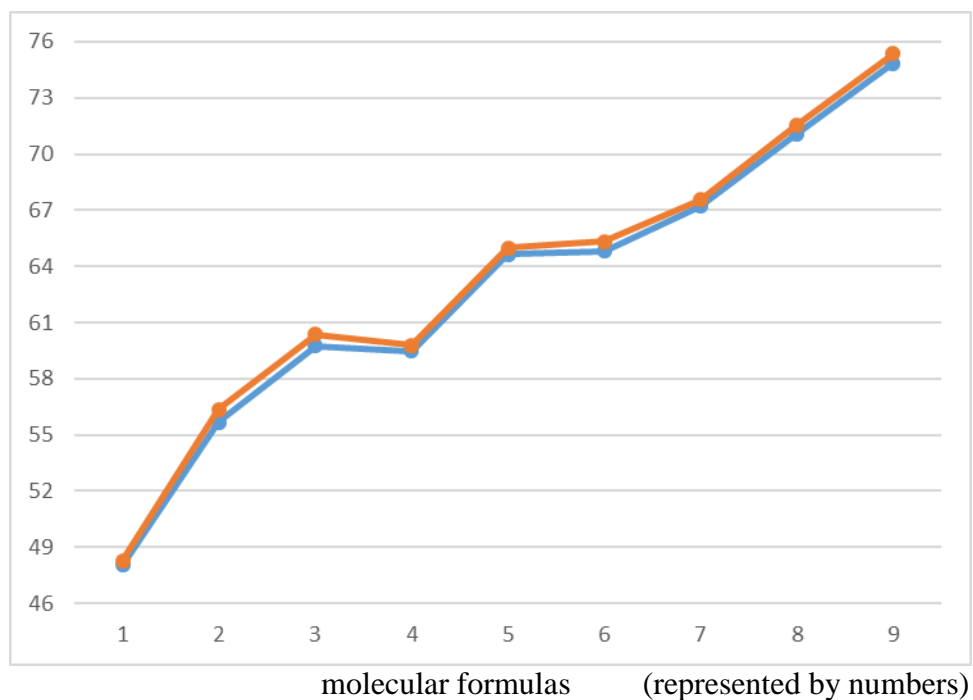

**Figure S 8**

**Visualization of relevant trends of the effect of Grimme's correction on the estimation of the ZPE correction for the conformers of selected trimeric acylphloroglucinols.**

The values of the ZPE correction (kcal/mol, reported in table S9) pertain to the vertical axis of the graphs.

- DFT/B3LYP/6-31+G(d,p) results for conformers with outstretched geometry
- DFT/B3LYP/6-31+G(d,p) results for conformers with half-bowl-shaped geometry
- DFT/B3LYP/6-31+G(d,p)-D3 results for conformers with outstretched geometry
- DFT/B3LYP/6-31+G(d,p)-D3 results for conformers with half-bowl-shaped geometry

- a) **Molecules in which no OH group is replaced by other functions.**  
In this case, the numbers on the horizontal axis denote the conformers' pairs.

**a) 1) conformers of the T1 molecule**

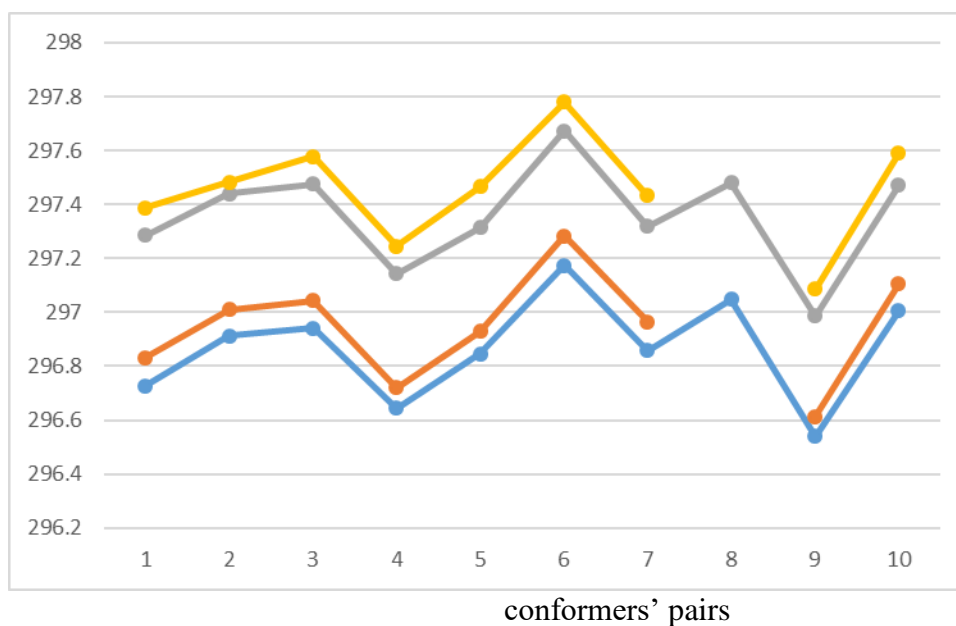

**a) 2) conformers of the T7 molecule**

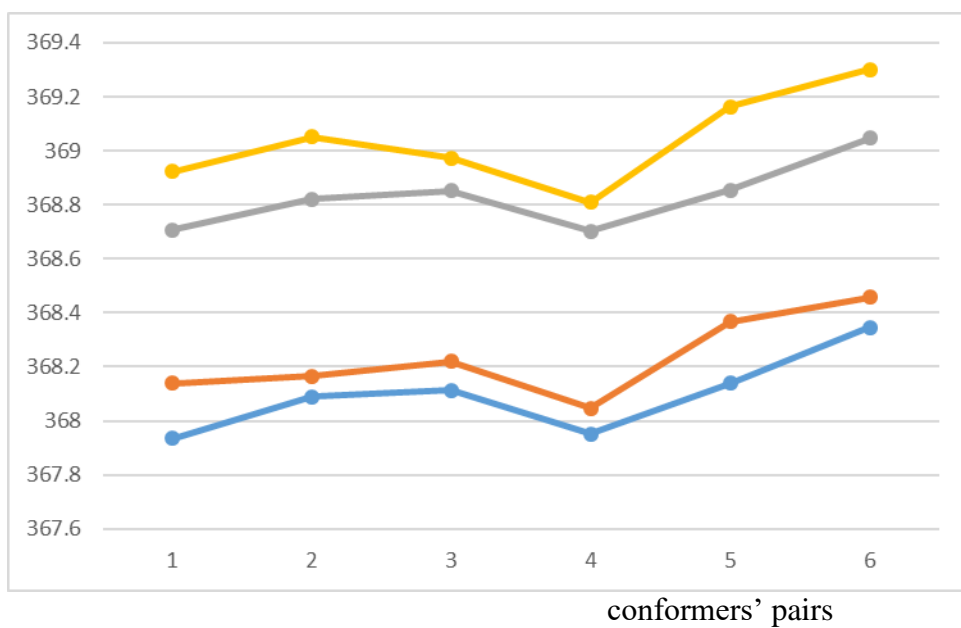

**a) 3) conformers of the T9 molecule**

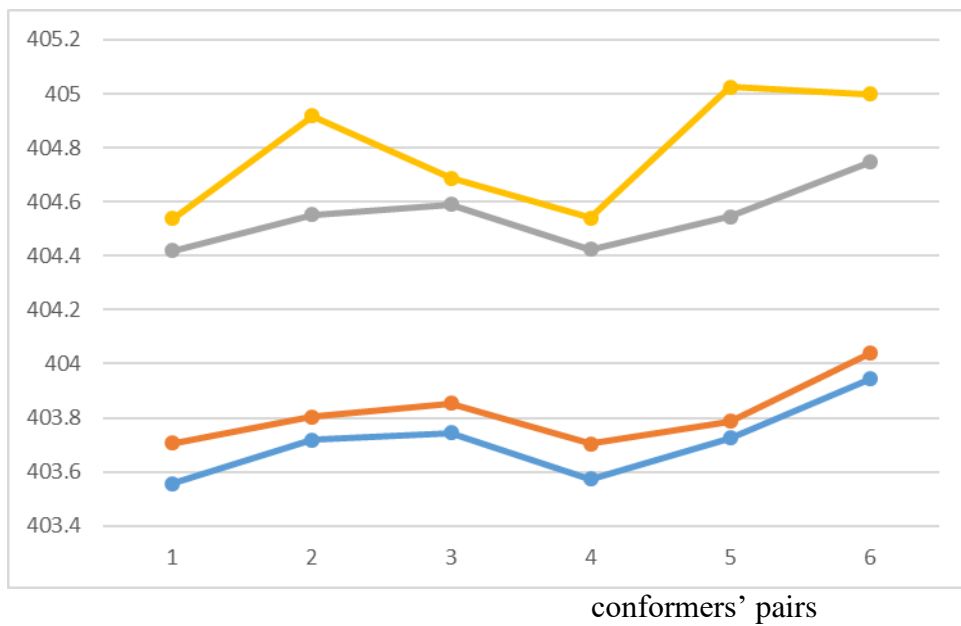

a) 4) conformers of the T9- M5,3" molecule

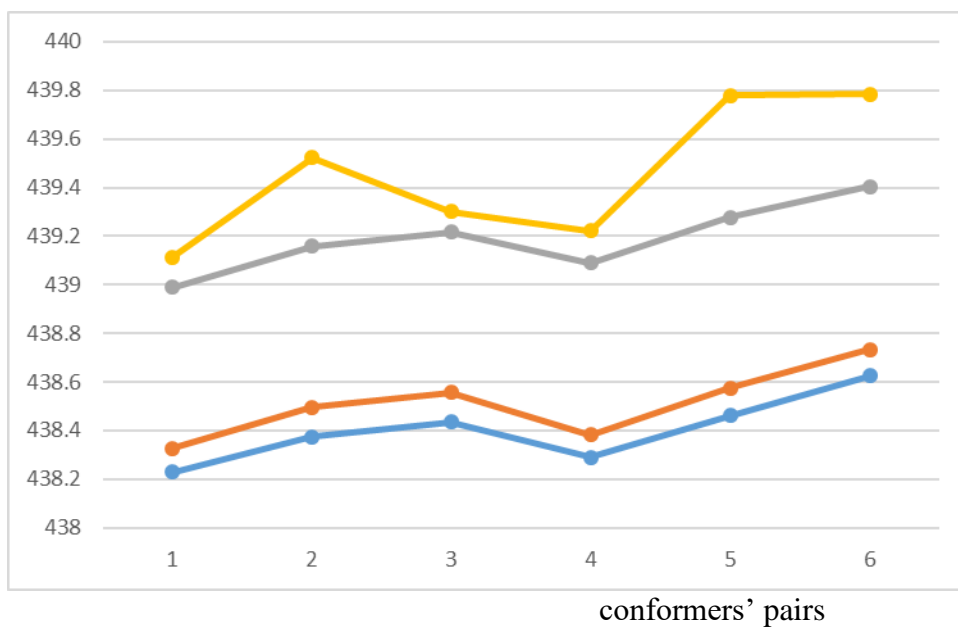

a) 5) conformers of the T10 molecule

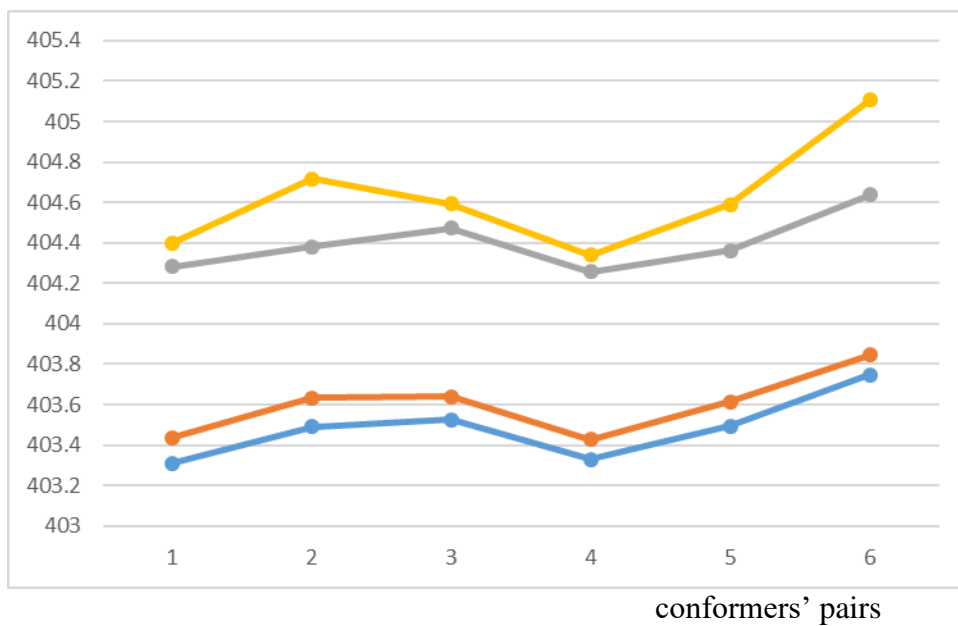

**b) Molecules in which the inward OH group ortho to the acyl group is replaced by a keto O in one of the outer monomers**

In this case, the numbers on the horizontal axis denote the pairs of conformers.

**b) 1) conformers of the T7-KT6''-M5,3'',3'' molecule**

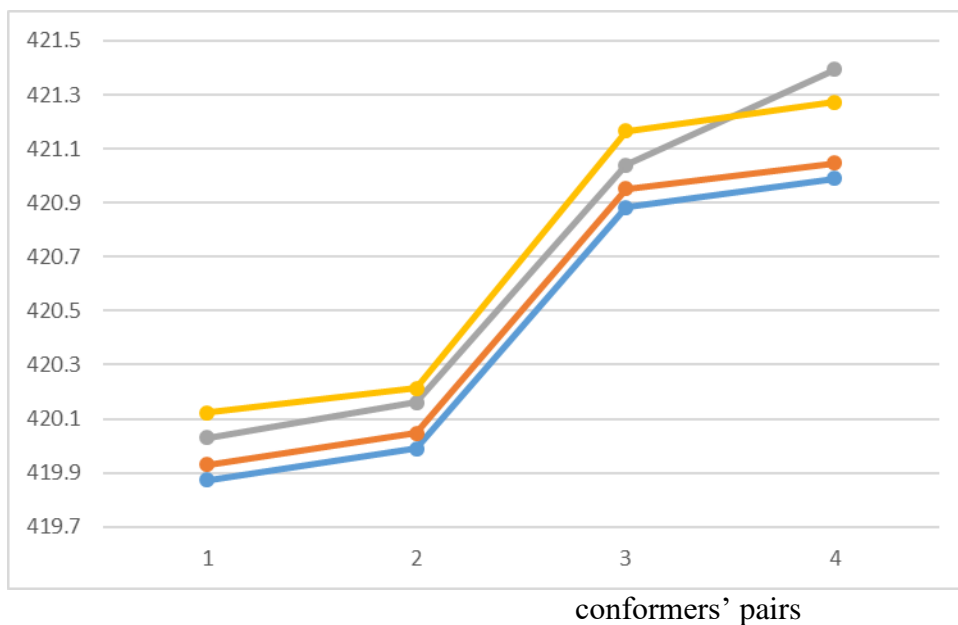

**b) 2) conformers of the T8-KT6''-M5,3'',3'' molecule**

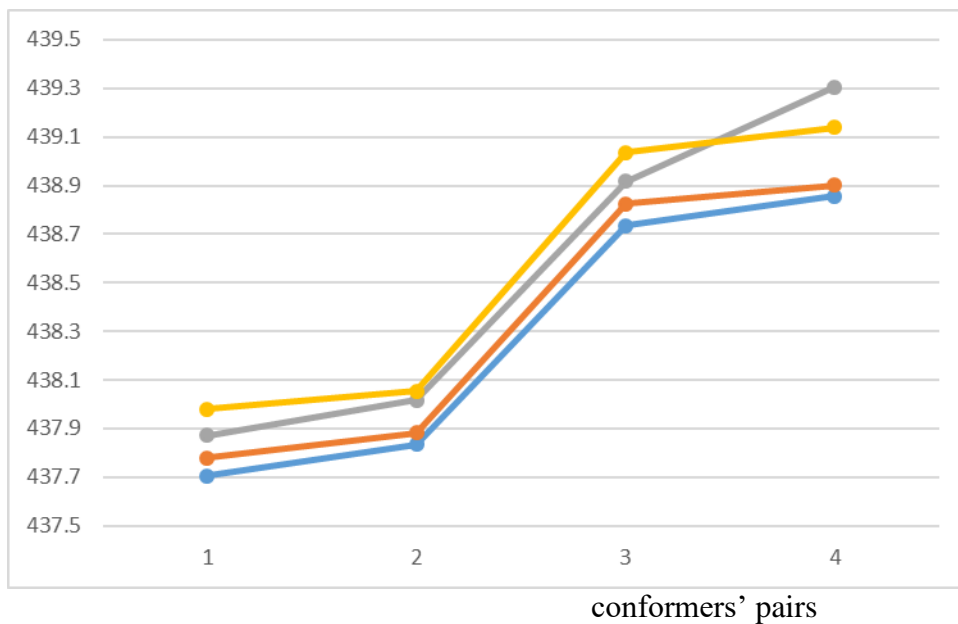

**b) 3) conformers of the T8-KT2-M5,5,3" molecule**

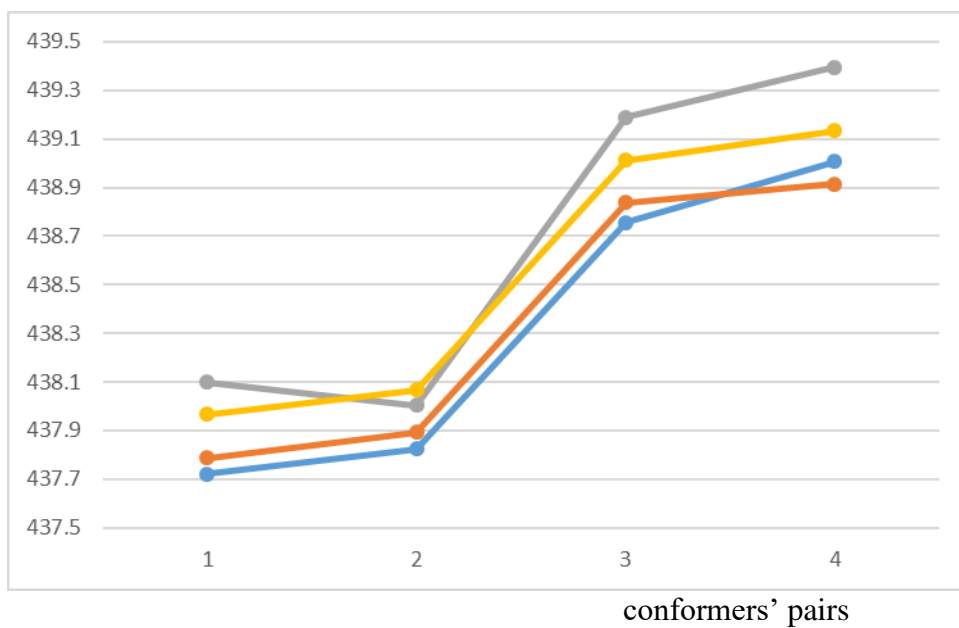

**b) 4) conformers of the T9-KT6"-M5,3",3" molecule**

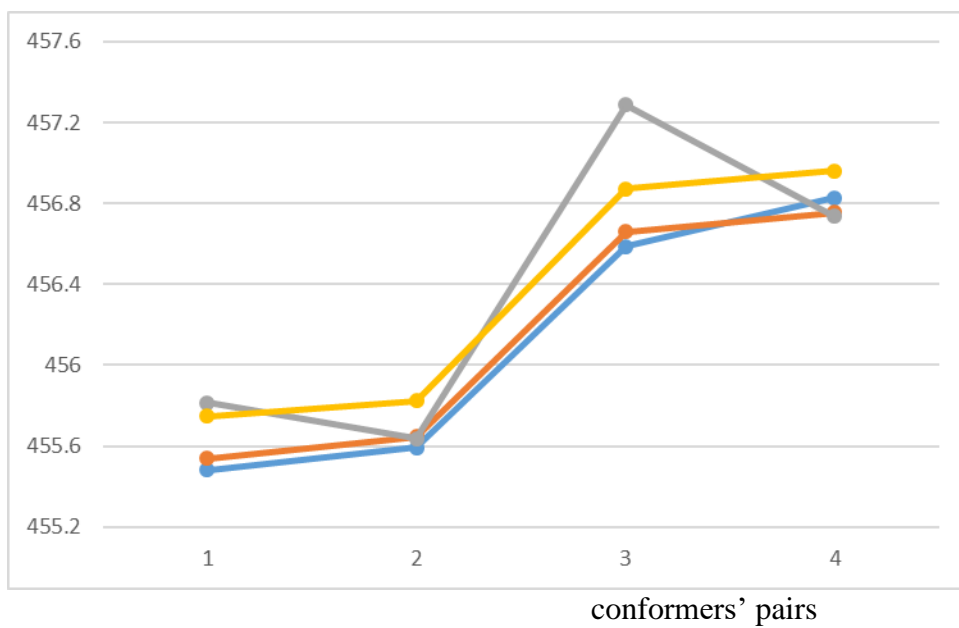



**b) 5) conformers of the T12-KT2-M5,5,3" molecule**

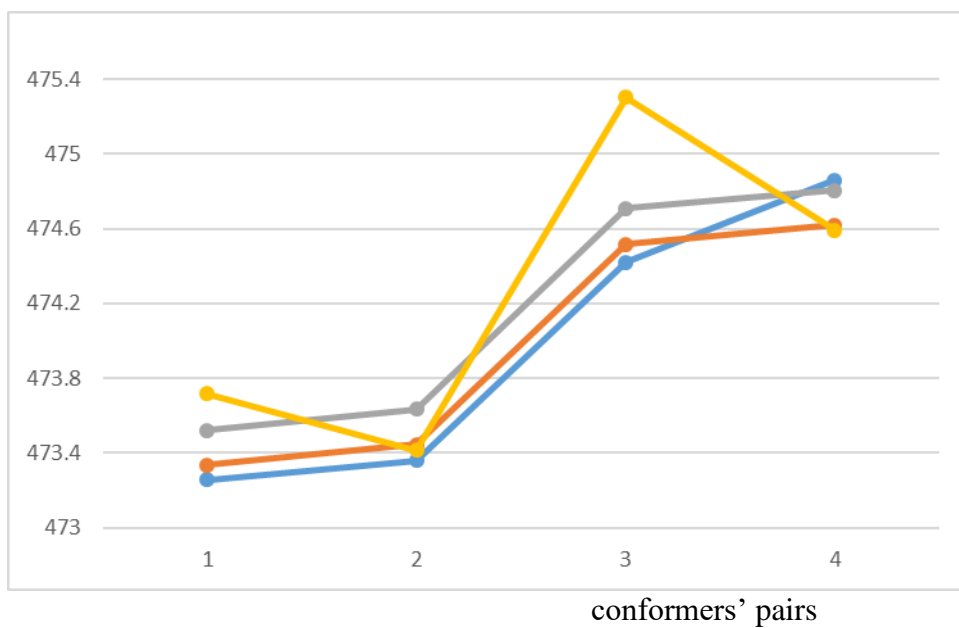

**b) 6) conformers of the T12-KT6"-M5,3",3" molecule**

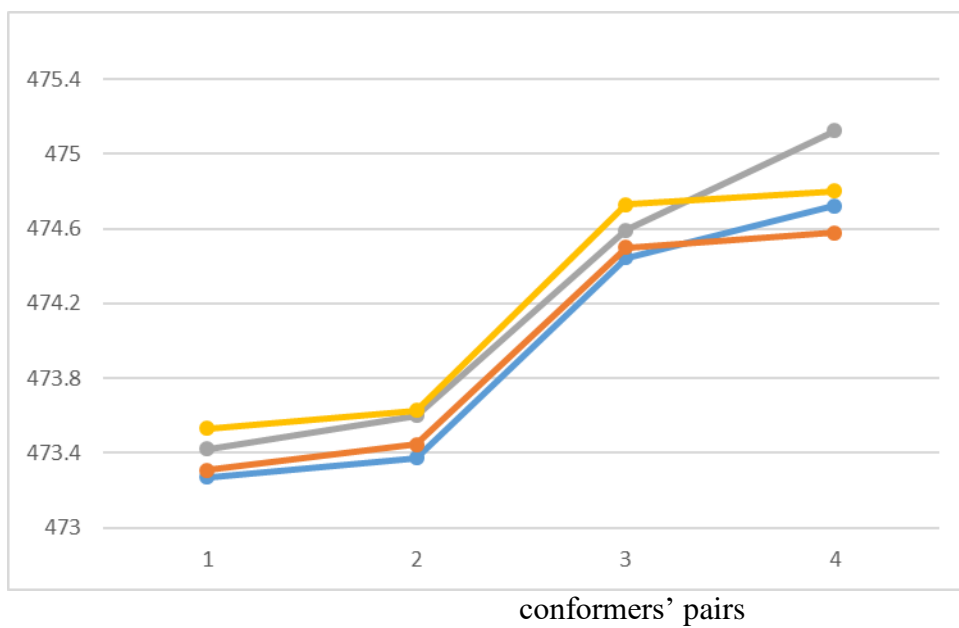

c) **Molecules in which the inward OH group ortho to the acyl group is replaced by a keto O in each of the outer monomers**

In this case, there is only one pair of conformers for each molecule. The numbers on the horizontal axis denote the molecules as indicated in the table below.

| molecule                | number denoting it on the x axis | molecule                 | number denoting it on the x axis |
|-------------------------|----------------------------------|--------------------------|----------------------------------|
| T2-KT2,6''-M5,5,3'',3'' | 1                                | T8-KT2,6''-M5,5,3'',3''  | 5                                |
| T4-KT2,6''-M5,5,3'',3'' | 2                                | T9-KT2,6''-M5,5,3'',3''  | 6                                |
| T5-KT2,6''-M5,5,3'',3'' | 3                                | T10-KT2,6''-M5,5,3'',3'' | 7                                |
| T7-KT2,6''-M5,5,3'',3'' | 4                                |                          |                                  |

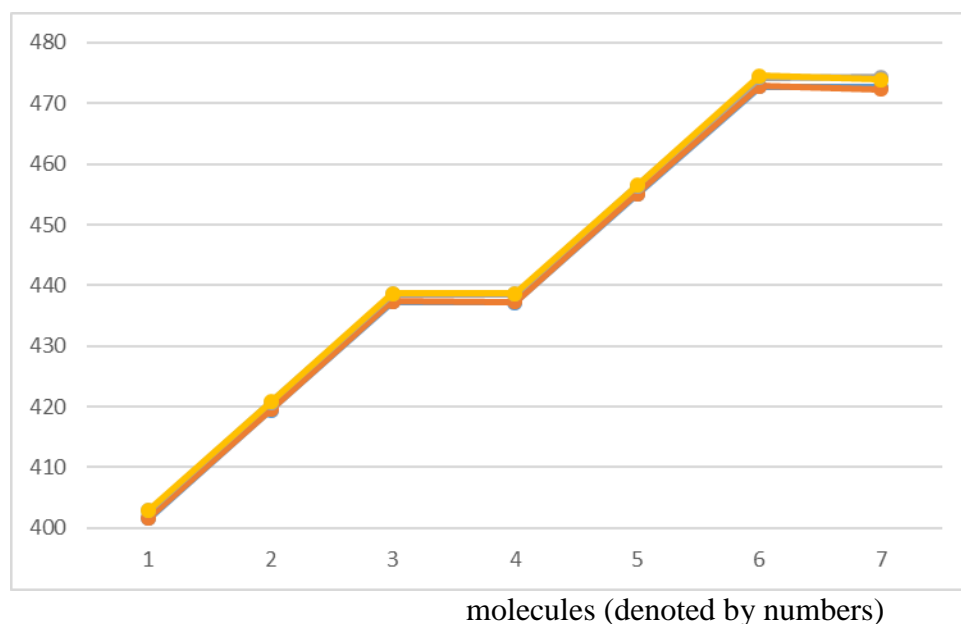

d) **Molecules in which the OH groups at C6 and at C2'' are replaced by OCH<sub>3</sub> ether groups**

In this case, there is only one pair of conformers for each molecule. The numbers on the horizontal axis denote the molecules as indicated in the table below.

| molecule          | number denoting it on the x axis | molecule           | number denoting it on the x axis |
|-------------------|----------------------------------|--------------------|----------------------------------|
| T3-ET6,2''        | 1                                | T10-M5,3''-ET6,2'' | 8                                |
| T3-M5,3''-ET6,2'' | 2                                | T11-ET6,2''        | 9                                |
| T7-ET6,2''        | 3                                | T11-M5,3''-ET6,2'' | 10                               |
| T7-M5,3''-ET6,2'' | 4                                | T13-ET6,2''        | 11                               |
| T9-ET6,2''        | 5                                | T13-M5,3''-ET6,2'' | 12                               |
| T9-M5,3''-ET6,2'' | 6                                | T14-ET6,2''        | 13                               |
| T10-ET6,2''       | 7                                | T14-M5,3''-ET6,2'' | 14                               |

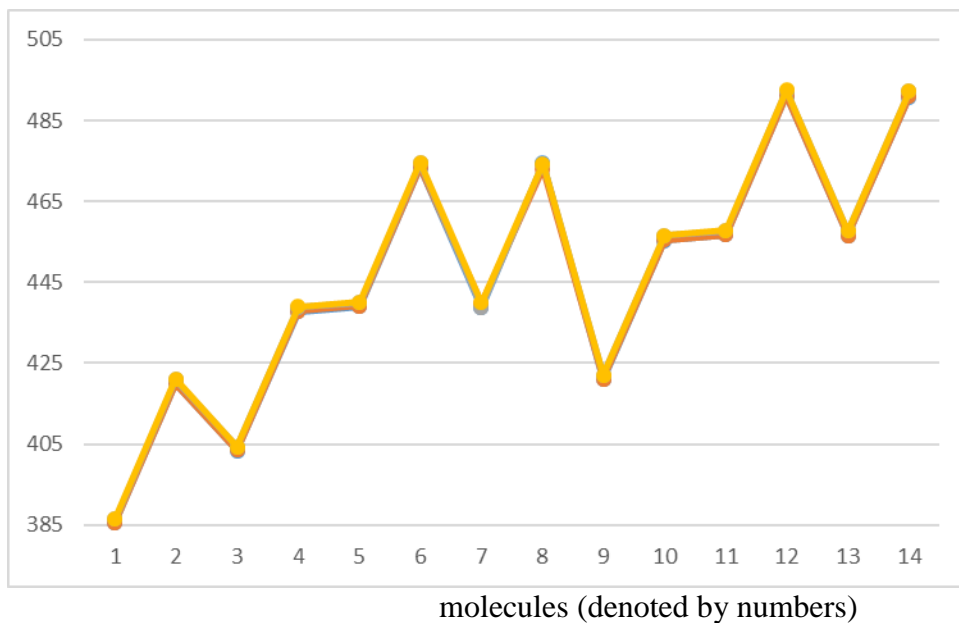

e) **Trend in terms of the molecular formulas**

The diagram considers the smallest value of the dispersion-related energy decrease among the molecules having the same molecular formula (table S 7). The numbers on the horizontal axis correspond to the molecular formulas as indicated in the table below. For each formula, the blue line refers to the DFT results and the brown line to the DFT-D3 results.

| number on the x axis | molecular formula    | molecular mass (a.m.u) | number on the x axis | molecular formula    | molecular mass (a.m.u) |
|----------------------|----------------------|------------------------|----------------------|----------------------|------------------------|
| 1                    | $C_{26}H_{24}O_{12}$ | 528                    | 6                    | $C_{34}H_{40}O_{12}$ | 640                    |
| 2                    | $C_{30}H_{32}O_{12}$ | 584                    | 7                    | $C_{35}H_{42}O_{12}$ | 654                    |
| 3                    | $C_{31}H_{34}O_{12}$ | 598                    | 8                    | $C_{36}H_{44}O_{12}$ | 668                    |
| 4                    | $C_{32}H_{36}O_{12}$ | 612                    | 9                    | $C_{37}H_{46}O_{12}$ | 682                    |
| 5                    | $C_{33}H_{38}O_{12}$ | 626                    |                      |                      |                        |

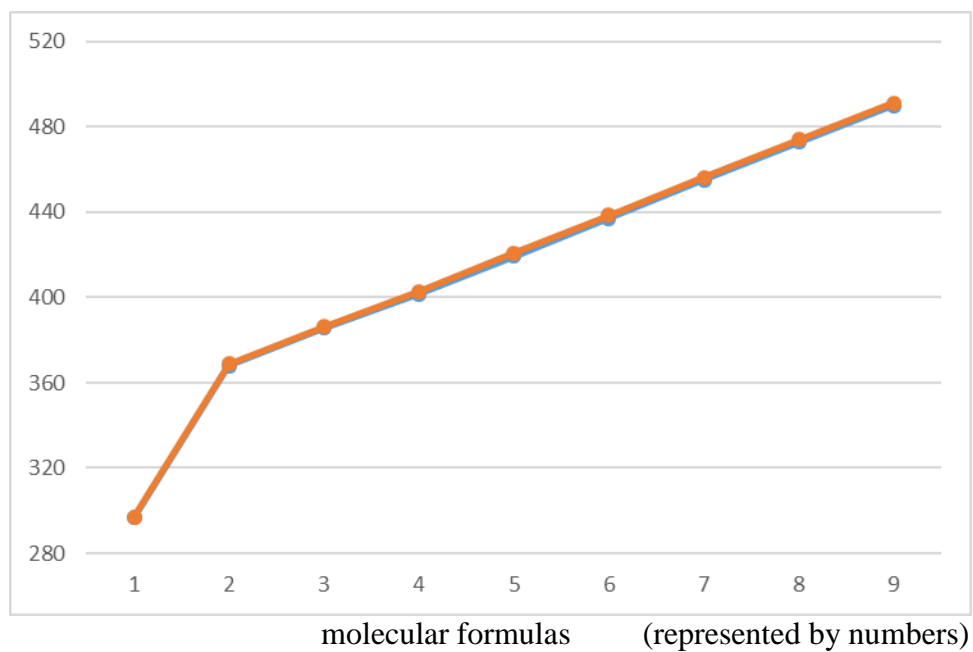

**Figure S 9. Comparisons of the lengths of corresponding intramolecular hydrogen bonds (IHBs) in the DFT/B3LYP/6-31+G(d,p) results without and with the Grimme's correction, for selected trimeric acylphloroglucinol molecules.**

The conformers of the lowest energy pair (1 and 1-y) are considered for each selected molecule. The molecules are grouped according to the presence of the same set of IHBs in the lowest energy conformers.

The molecules and the two conformers considered are denoted by numbers, as indicated in specific tables for each group of molecules. The length of the IHBs (Å) is the quantity on the vertical axis of the diagrams.

The blue line refers to the results without Grimme's correction and the brown line refers to the results with the Grimme's correction.

Different IHBs are considered individually, in separate diagrams. The titles of the diagrams also recall whether the given IHB is a 'first IHB' or an intermonomer IHB (IMHB).

**a) Comparison of the length of the same IHB in different conformers of the T1 molecule**

The conformers in which the given IHB is present are denoted by numbers on the x axis, as indicated in the tables provided under the name of each IHB. The other IHBs present in the conformer are also reported in the table as information on the molecular context.

**a) 1) H15...O14 first IHB**

| number<br>on<br>x axis | conformer | other IHBs in the conformer                                                      |
|------------------------|-----------|----------------------------------------------------------------------------------|
| 1                      | 1         | H17'...O14', H17''...O14'', H16'...O8, H16...O12',<br>H16''...O10', H15'...O12'' |
| 2                      | 1-y       |                                                                                  |
| 3                      | 2         | H17'...O14', H15''...O14'', H16'...O8, H16...O12',<br>H17''...O10', H15'...O10'' |
| 4                      | 2-y       |                                                                                  |
| 5                      | 3         | H15'...O14', H15''...O14'', H17'...O8, H16...O10',<br>H17''...O8', H16'...O10''  |
| 6                      | 3-y       |                                                                                  |
| 7                      | 4         | H17'...O14', H17''...O14'', H10'...O8, H16...O12',<br>H16''...O10', H15'...O12'' |
| 8                      | 4-y       |                                                                                  |
| 9                      | 5         | H17'...O14', H15''...O14'', H16'...O8, H16...O12',<br>H16''...O10', H15'...O10'' |
| 10                     | 5-y       |                                                                                  |
| 11                     | 7         | H15'...O14', H15''...O14'', H17'...O8, H16...O10',<br>H17''...O8', H16'...O10''  |
| 12                     | 7-y       |                                                                                  |
| 13                     | 9         | H17'...O14', H17''...O14'', H16'...O8, H16...O12',                               |

|    |      |                                                        |
|----|------|--------------------------------------------------------|
| 14 | 9-y  | H16''....O10', H15'....O12''                           |
| 15 | 10   | H15'....O14', H15''....O14'', H17'....O8, H16....O10', |
| 16 | 10-y | H17''....O8', H16'....O12''                            |
| 17 | 11   | H15'....O14', H15''....O14'', H17'....O8, H16'....O10, |
| 18 | 11-y | H17''....O8', H16''....O10'                            |
| 19 | 12   | H17'....O14', H15''....O14'', H16'....O8, H16....O12', |
| 20 | 12-y | H17''....O10', H16''....O8'                            |
| 21 | 15   | H15'....O14', H15''....O14'', H17'....O8, H16....O10', |
| 22 | 15-y | H16''....O8', H17''....O10'                            |
| 23 | 16   | H15'....O14', H15''....O14'', H17'....O8, H16....O10', |
| 24 | 16-y | H16''....O8', H17'....O10'''                           |
| 25 | 18   | H15'....O14', H15''....O14'', H16'....O8, H17'....O10, |
| 26 | 18-y | H17''....O10', H16''....O8'                            |
| 27 | 19   | H15'....O14', H15''....O14'', H17'....O8, H16'....O10, |
| 28 | 19-y | H17''....O8', H16''....O10'                            |
| 29 | 21   | H15'....O14', H15''....O14'', H17'....O8, H16'....O10, |
| 30 | 21-y | H16''....O8', H17'....O10''                            |
| 31 | 22   | H15'....O14', H15''....O14'', H16'....O8, H17'....O10, |
| 32 | 22-y | H17''....O10', H16''....O8'                            |
| 33 | 23   | H17'....O14', H15''....O14, H16'....O8'', H16....O12', |
| 34 | 23-y | H17''....O10', H16''....O8'                            |

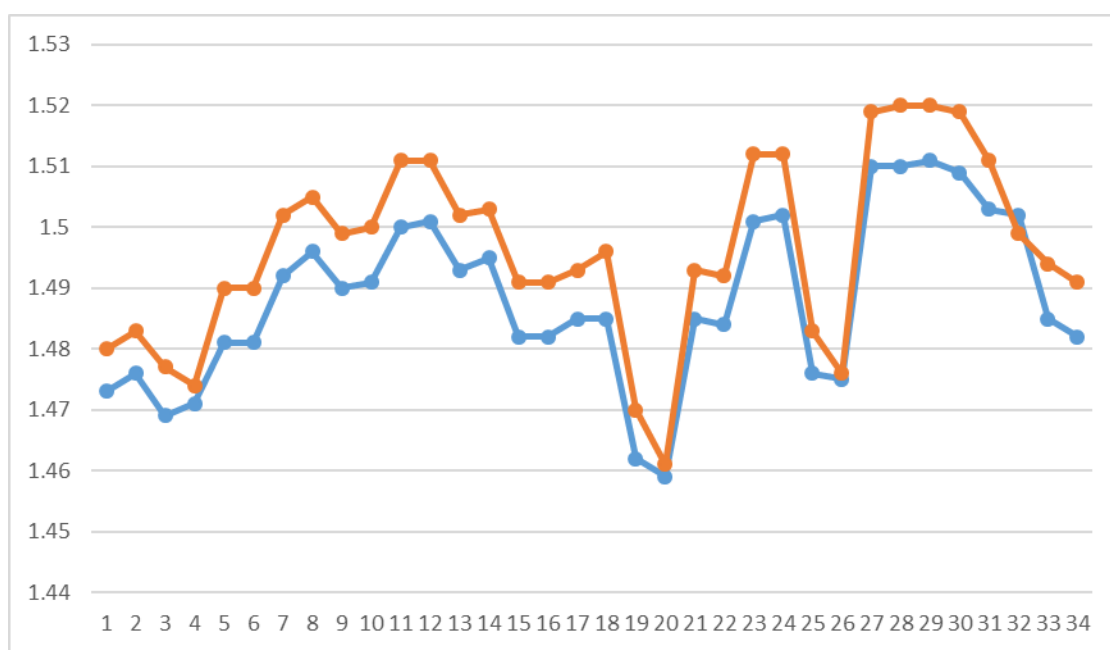

conformers, denoted by numbers

a) 2) **H16'....O8 IMHB**

| number<br>on<br>x axis | conformer | other IHBs in the conformer                                                                        |
|------------------------|-----------|----------------------------------------------------------------------------------------------------|
| 1                      | 1         | H15....O14, H17'....O14', H17''....O14'', H16....O12',<br>H16''....O10', H15'....O12''             |
| 2                      | 1-y       |                                                                                                    |
| 3                      | 2         | H15....O14, H17'....O14', H15''....O14'', H16....O12',<br>H17''....O10', H15'....O10''             |
| 4                      | 2-y       |                                                                                                    |
| 5                      | 5         | H15....O14, H17'....O14' , H15''....O14'', H16....O12',<br>H16''....O10', H15'....O10''            |
| 6                      | 5-y       |                                                                                                    |
| 7                      | 9         | H15....O14, H17'....O14', H17''....O14'', H16....O12',<br>H16''....O10', H15'....O12''             |
| 8                      | 9-y       |                                                                                                    |
| 9                      | 12        | H15....O14, H17'....O14', H15''....O14'', H16....O12',<br>H17''....O10', H16''....O8'              |
| 10                     | 12-y      |                                                                                                    |
| 11                     | 14        | H17....O14, H15'....O14', H17''....O14'', H16....O12',<br>H16''....O10', H15'....O12''             |
| 12                     | 14-y      |                                                                                                    |
| 13                     | 17        | H17....O14, H17'....O14', H17''....O14'', H17'....O10,<br>H16''....O10', H17''....O8'              |
| 14                     | 17-y      |                                                                                                    |
| 15                     | 18        | H15....O14, H15'....O14' , H15''....O14'', H17'....O10,<br>H17''....O10', H16''....O8'             |
| 16                     | 18-y      |                                                                                                    |
| 17                     | 20        | H17....O14, H17'....O14', H17''....O14'', H17'....O10,<br>H16''....O10', H17''....O8'              |
| 18                     | 20-y      |                                                                                                    |
| 19                     | 22        | H15....O14, H15'....O14' , H15''....O14'', H16'....O8,<br>H17'....O10, H17''....O10', H16''....O8' |
| 20                     | 22-y      |                                                                                                    |
| 21                     | 23        | H15....O14, H17'....O14' , H15''....O14, H16'....O8'',<br>H16....O12', H17''....O10', H16''....O8' |
| 22                     | 23-y      |                                                                                                    |
| 23                     | 25        | H17....O14, H15'....O14', H15''....O14'', H17'....O10,<br>H16''....O10', H17''....O8'              |
| 24                     | 25-y      |                                                                                                    |
| 25                     | 28        | H17....O14, H15'....O14', H15''....O14'', H17'....O10,<br>H16''....O8', H17'....O10''              |
| 26                     | 28-y      |                                                                                                    |

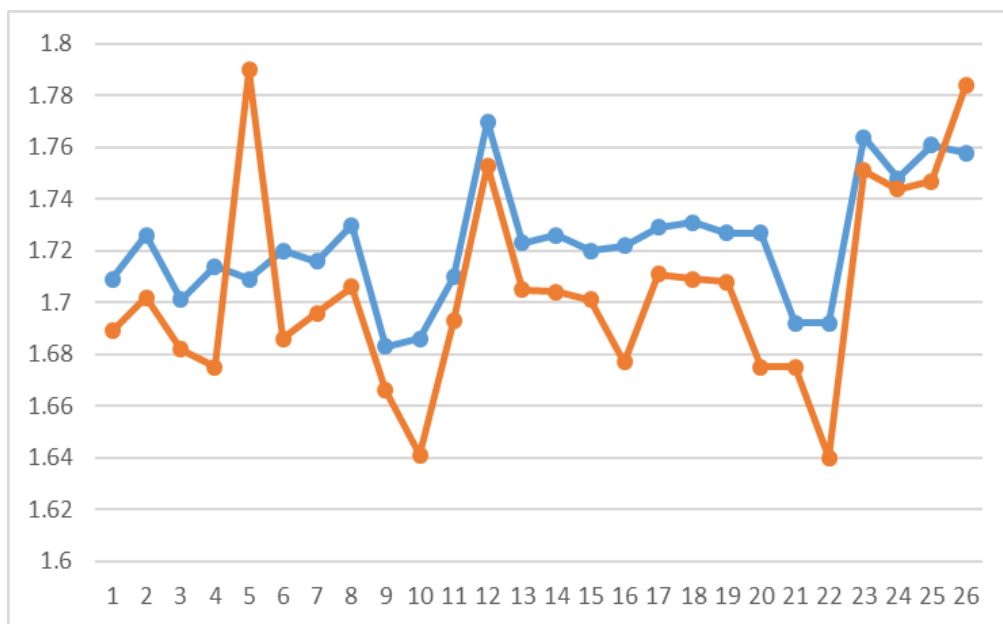

conformers, denoted by numbers

a) 3) H16....O12' IMHB

| number on<br>x axis | conformer | other IHBs in the conformer                                                            |
|---------------------|-----------|----------------------------------------------------------------------------------------|
| 1                   | 1         | H15....O14, H17'....O14', H17''....O14'', H16'....O8,<br>H16''....O10', H15'....O12''  |
| 2                   | 1-y       |                                                                                        |
| 3                   | 2         | H15....O14, H17'....O14', H15''....O14'', H16'....O8,<br>H17''....O10', H15'....O10''  |
| 4                   | 2-y       |                                                                                        |
| 5                   | 4         | H15....O14, H17'....O14', H17''....O14'', H10'....O8,<br>H16''....O10', H15'....O12''  |
| 6                   | 4-y       |                                                                                        |
| 7                   | 5         | H15....O14, H17'....O14' , H15''....O14'', H16'....O8,<br>H16''....O10', H15'....O10'' |
| 8                   | 5-y       |                                                                                        |
| 9                   | 9         | H15....O14, H17'....O14', H17''....O14'', H16'....O8,<br>H16''....O10', H15'....O12''  |
| 10                  | 9-y       |                                                                                        |
| 11                  | 12        | H15....O14, H17'....O14', H15''....O14'', H16'....O8,<br>H17''....O10', H16''....O8'   |
| 12                  | 12-y      |                                                                                        |
| 13                  | 14        | H17....O14, H15'....O14', H17''....O14'', H16'....O8,<br>H16''....O10', H15'....O12''  |
| 14                  | 14-y      |                                                                                        |
| 15                  | 23        | H15....O14, H17'....O14' , H15''....O14, H16'....O8'',<br>H17''....O10', H16''....O8'  |
| 16                  | 23-y      |                                                                                        |



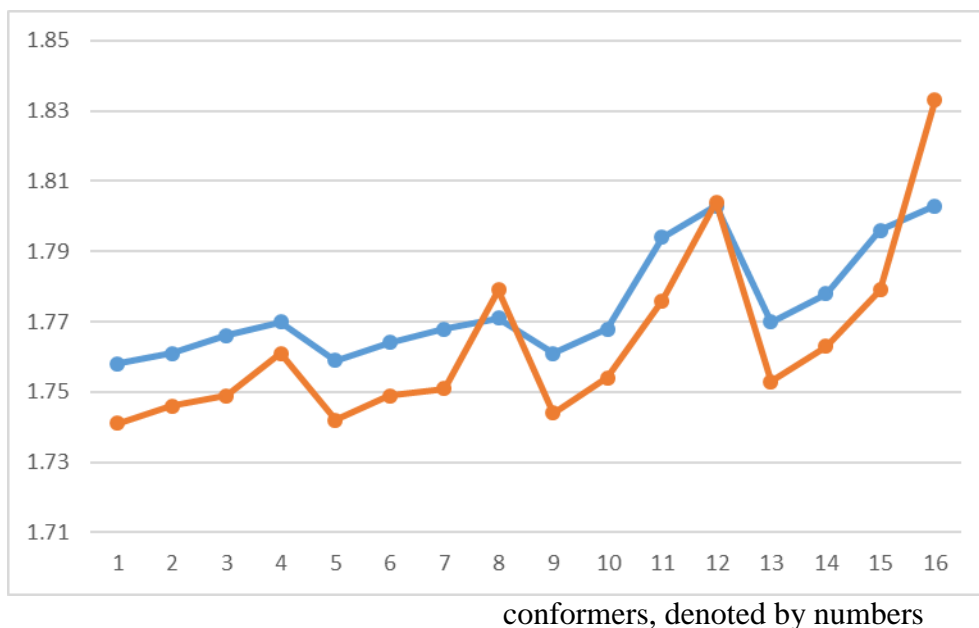

b) **Molecules whose lowest energy conformer contains the following IHBs: H15....O14, H17'....O14', H17''....O14'', H16'....O8, H16....O12', H16''....O10', H15'....O12''.**

The molecules and the conformers of their lowest energy pair are denoted by numbers of the x axis, according to the following table:

| molecule  | conformer | number on<br>x axis | molecule               | conformer | number on<br>x axis |
|-----------|-----------|---------------------|------------------------|-----------|---------------------|
| T1        | 1         | 1                   | T10                    | 1         | 9                   |
|           | 1-y       | 2                   |                        | 1-y       | 10                  |
| T7        | 1         | 3                   | T10-M5,3''-ET6,2'',6'' | 1         | 11                  |
|           | 1-y       | 4                   |                        | 1-y       | 12                  |
| T9        | 1         | 5                   | T11-ET6,2''            | 1         | 13                  |
|           | 1-y       | 6                   |                        | 1-y       | 14                  |
| T9-M5,3'' | 1         | 7                   | T11-M5,3''-ET6,2''     | 1         | 15                  |
|           | 1-y       | 8                   |                        | 1-y       | 16                  |

**b) 1) length of the H15...O14 first IHB**

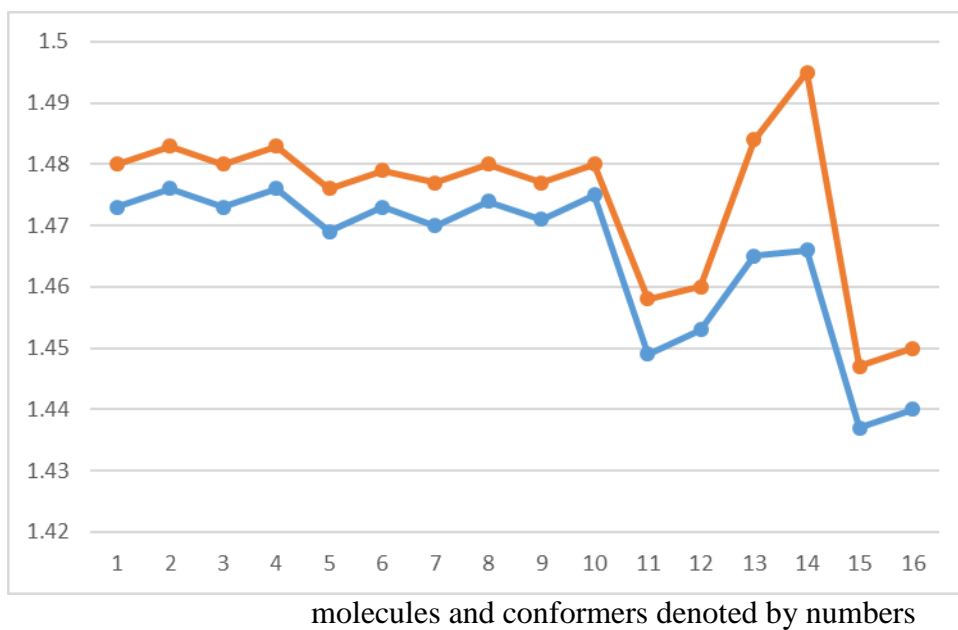

**b) 2) length of the H17'...O14' first IHB**

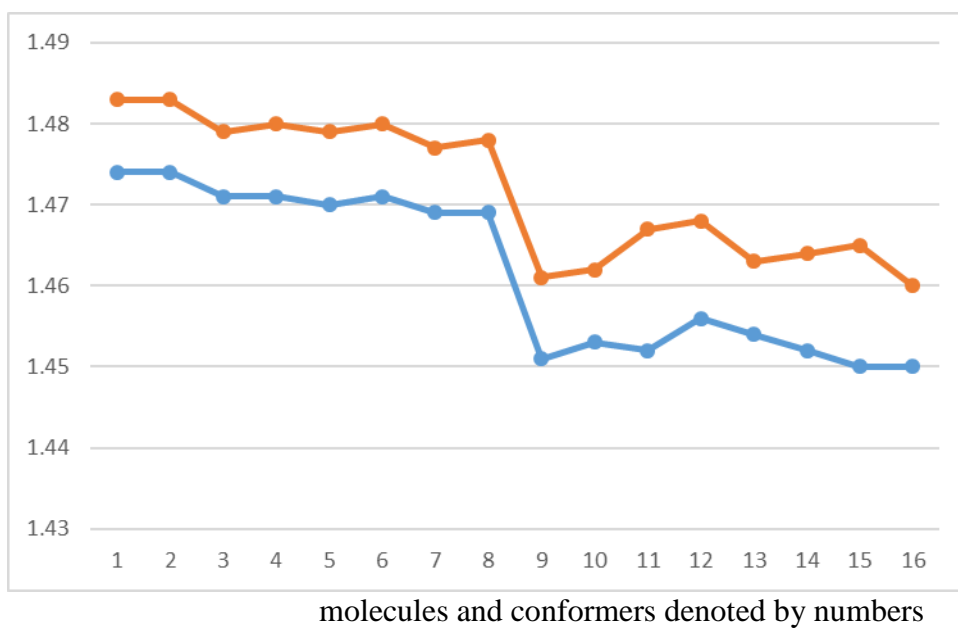

b) 3) length of the H17''....O14' first IHB

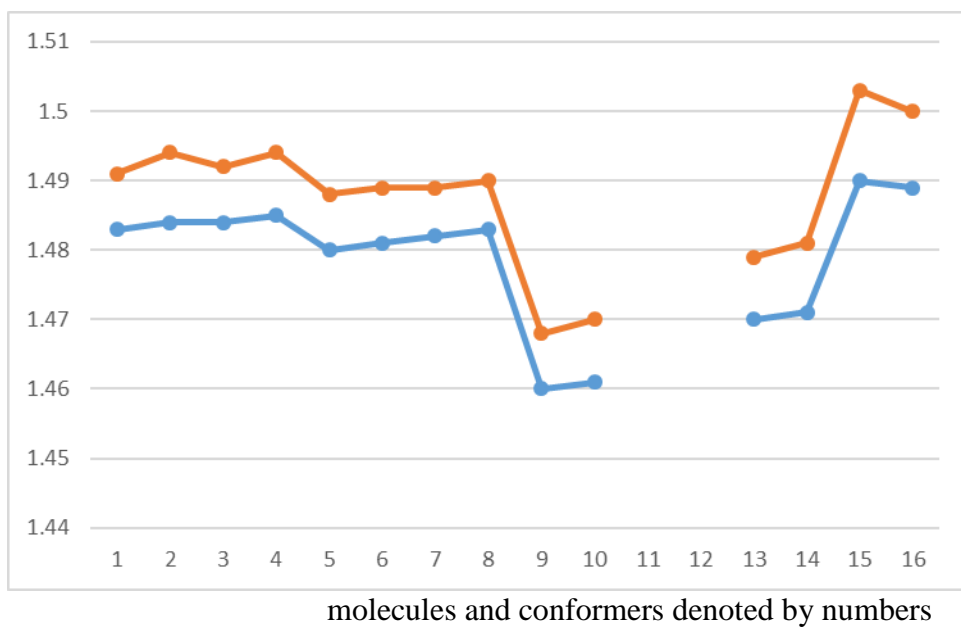

b) 4) length of the H16'....O8 IMHB

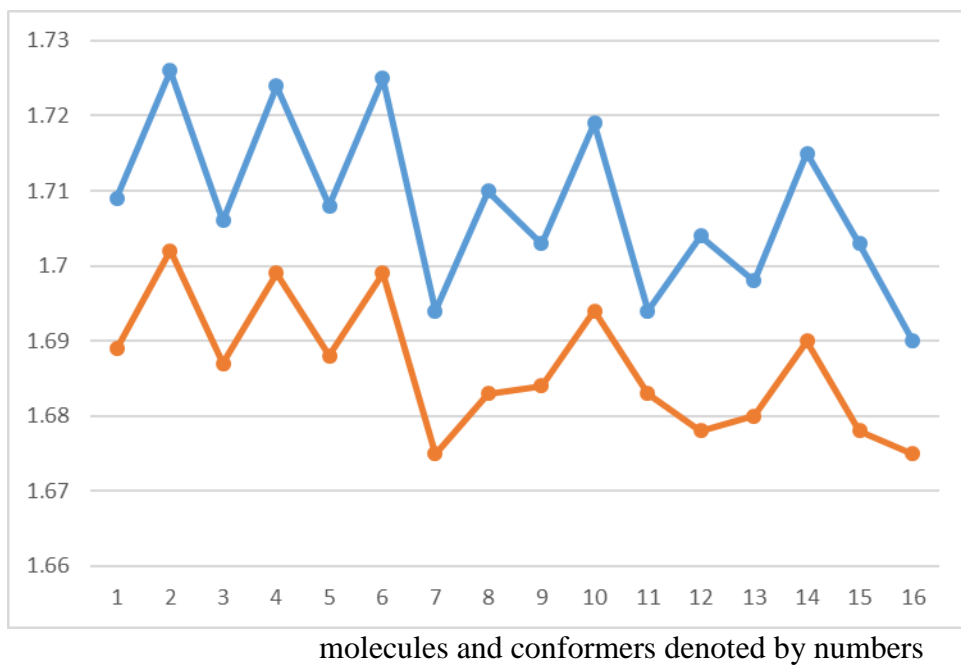

b) 5) length of the H16...O12' IMHB

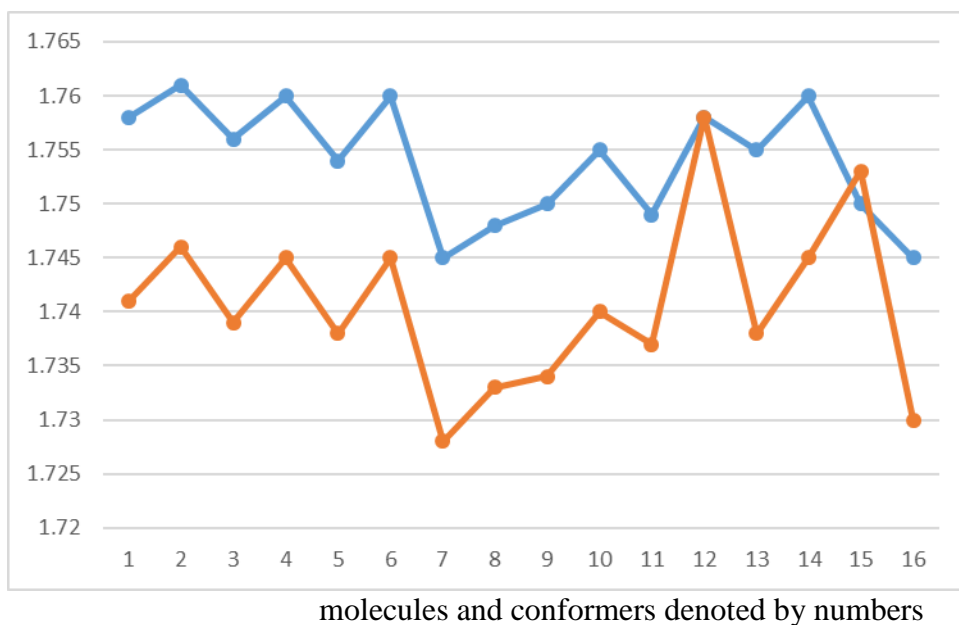

b) 6) length of the H16''...O10' IMHB

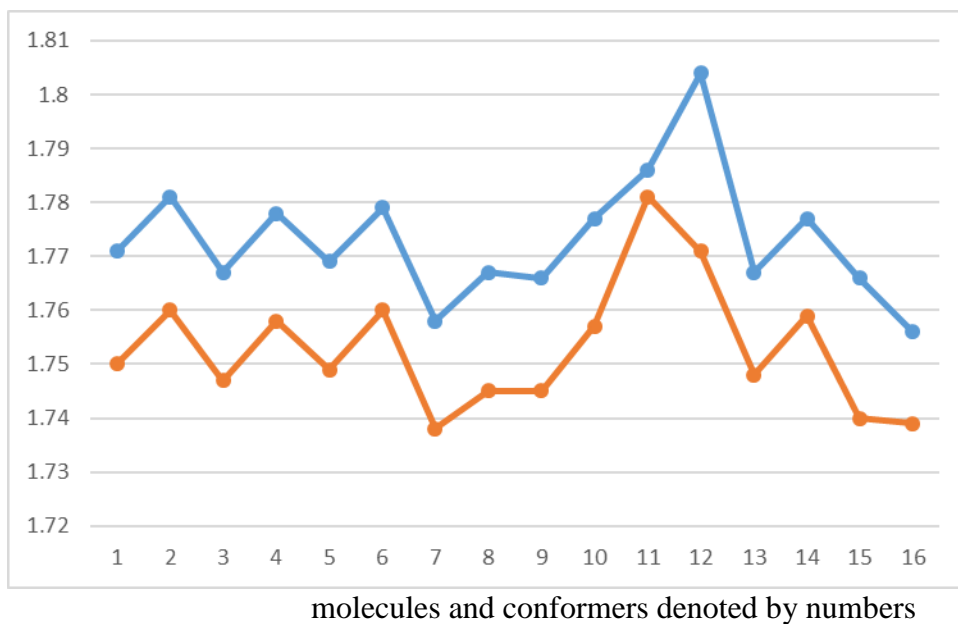

b) 7) length of the H15'.... O12" IMHB

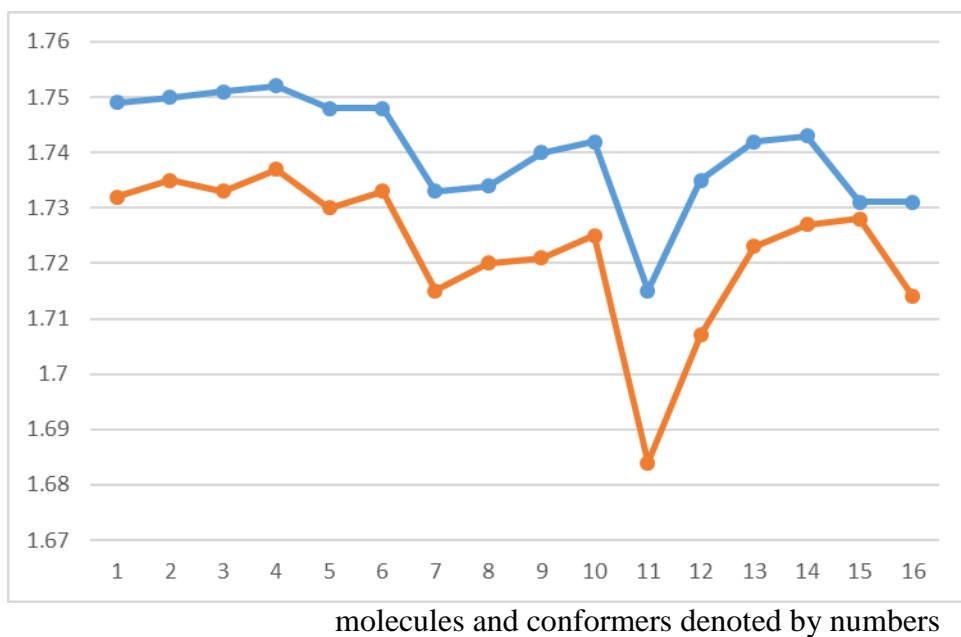

- c) Molecules in which the OH at C6" is replaced by a keto O. The lowest energy conformer pair contain the following IHBs: H15....O14, H15'....O14', H15"....O14", H17'....O8, H16....O10', H16"....O8', H16'....O12". The molecules and the conformers of their lowest energy pair are denoted by numbers on the x axis, according to the following table:

| molecule          | conformer | number on x axis |
|-------------------|-----------|------------------|
| T7-KT6"-M5,3",3"  | 1         | 1                |
|                   | 1-y       | 2                |
| T8-KT6"-M5,3",3"  | 1         | 3                |
|                   | 1-y       | 4                |
| T9-KT6"-M5,3",3"  | 1         | 5                |
|                   | 1-y       | 6                |
| T12-KT6"-M5,3",3" | 1         | 7                |
|                   | 1-y       | 8                |

c) 1) length of the H15...O14 first IHB

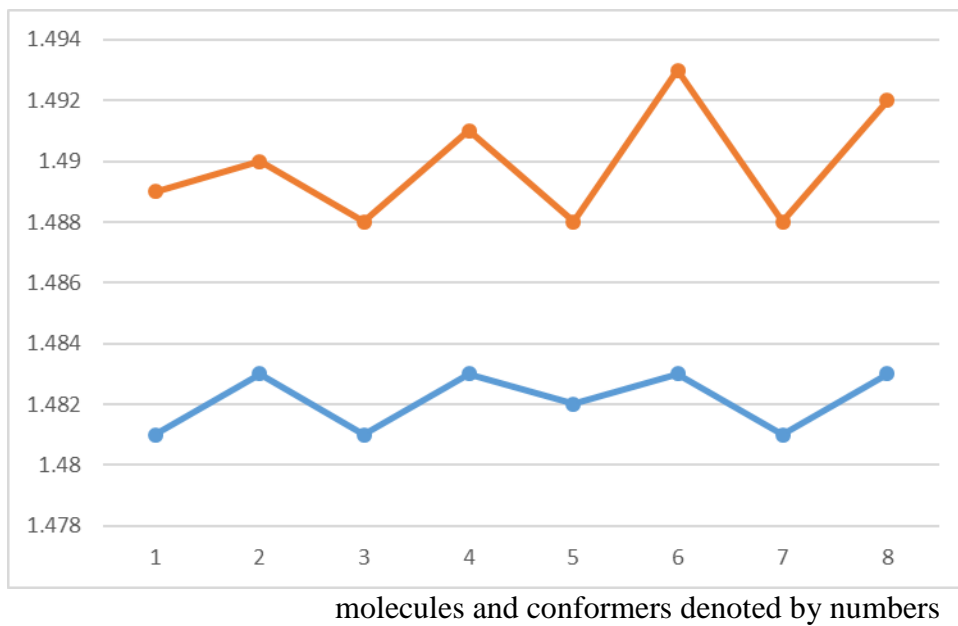

c) 2) length of the H15'...O14' first IHB

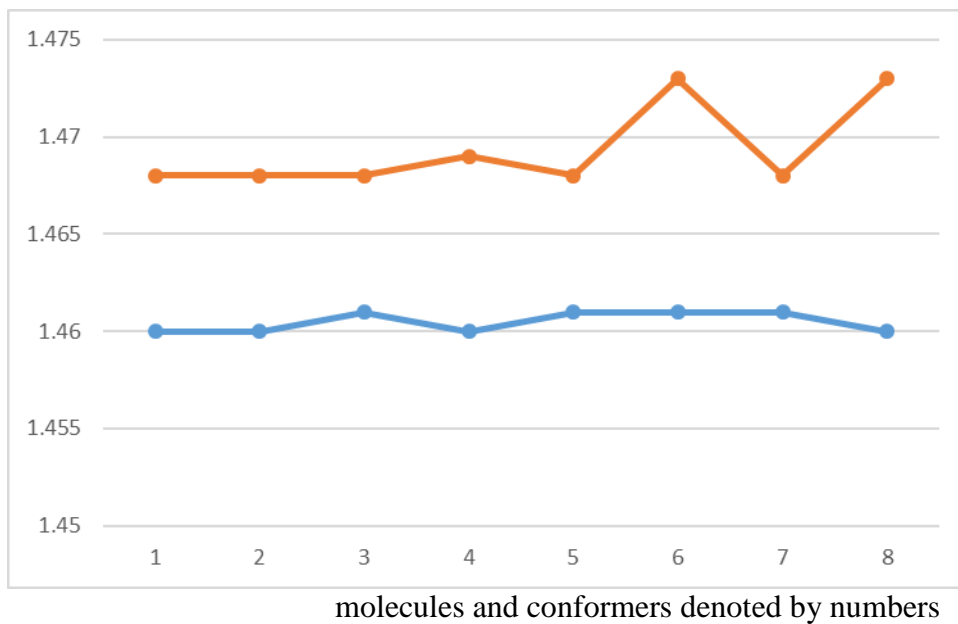

c) 3) length of the H15'....O14" first IHB

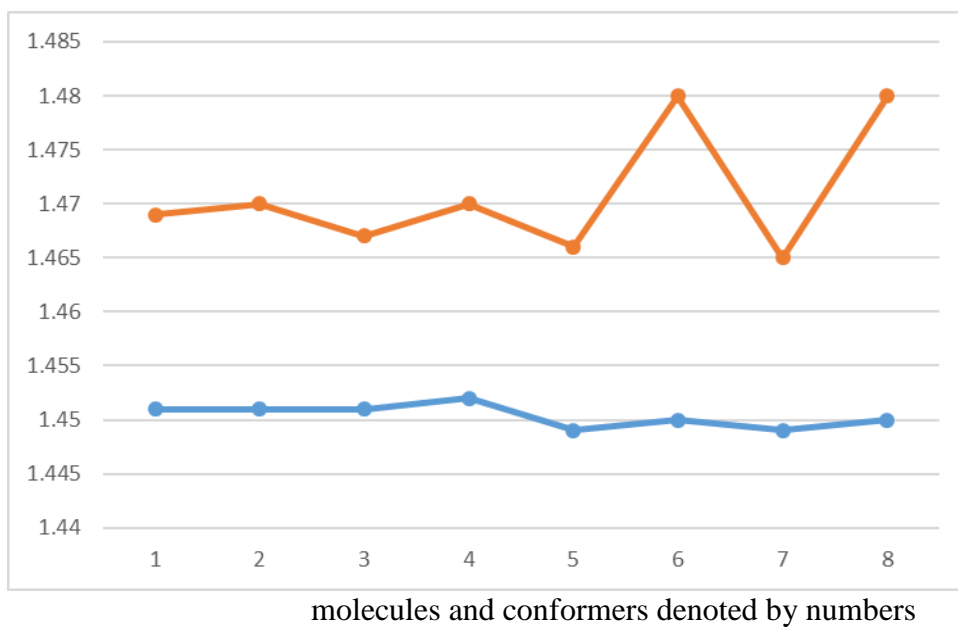

c) 4) length of the H17'....O8 IMHB

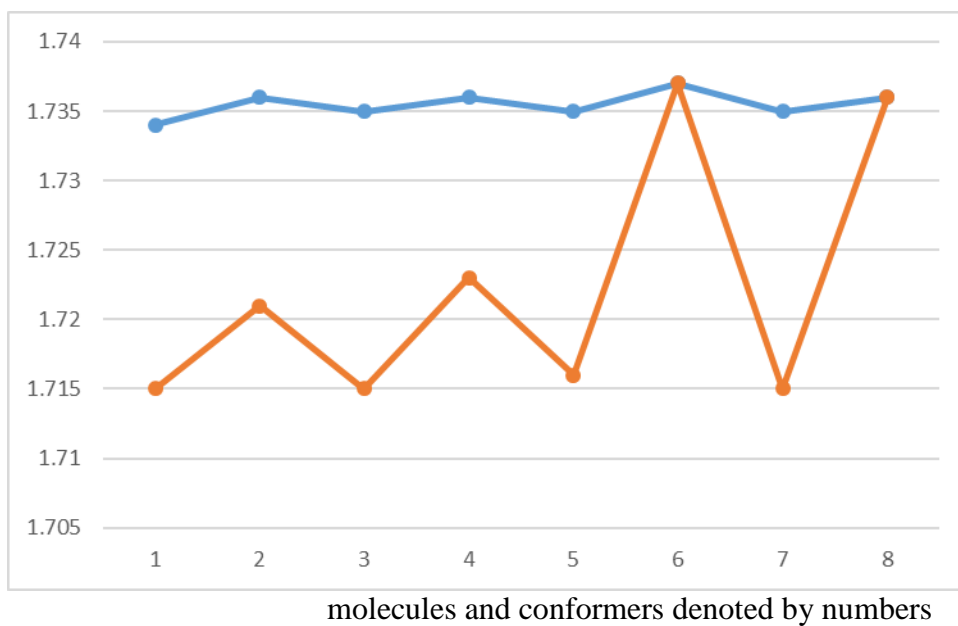

c) 5) length of the H16...O10' IMHB

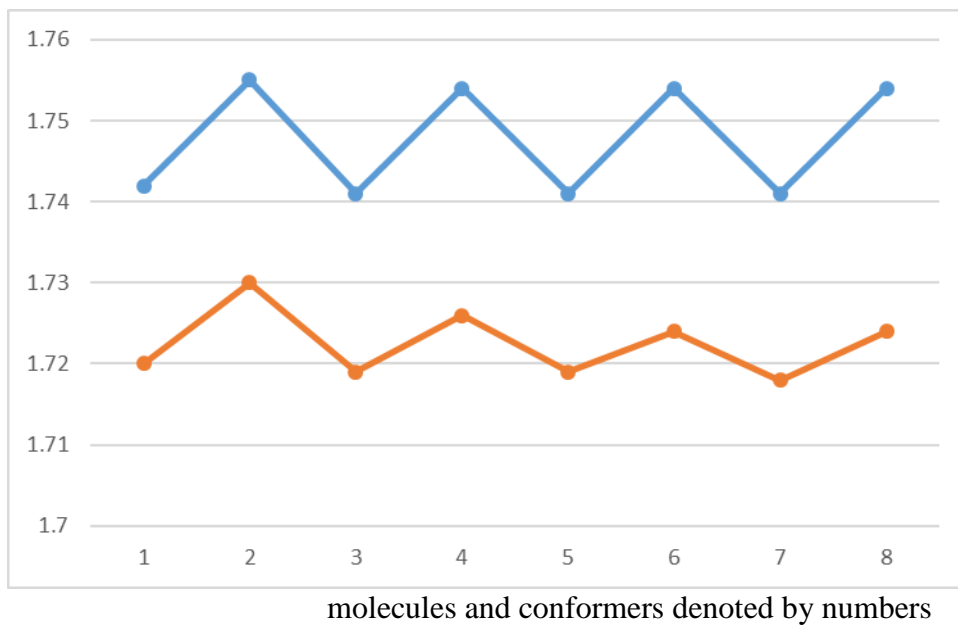

c) 6) length of the H16''...O8' IMHB

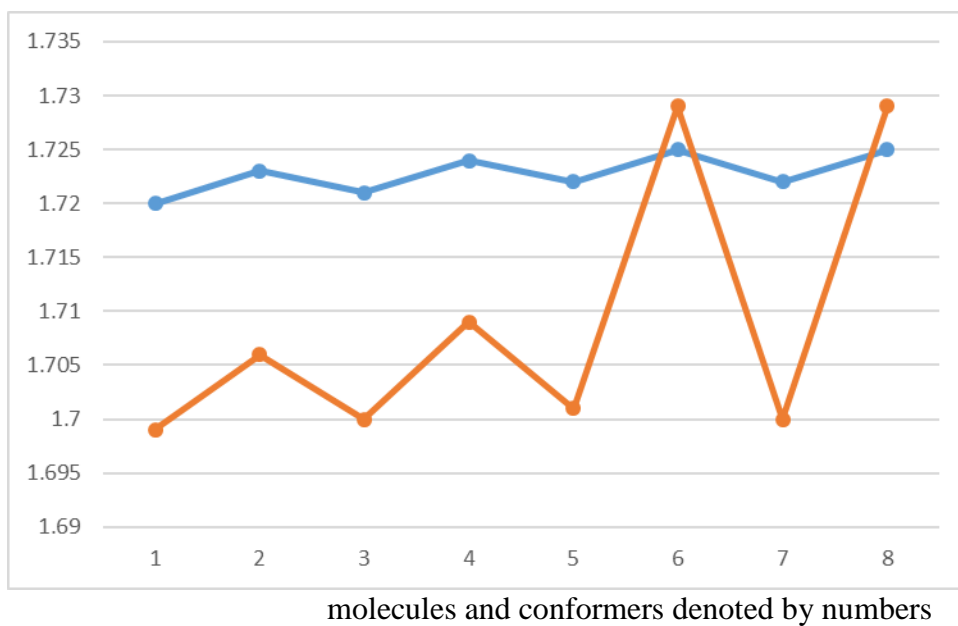



c) 7) length of the H16'....O12" IMHB

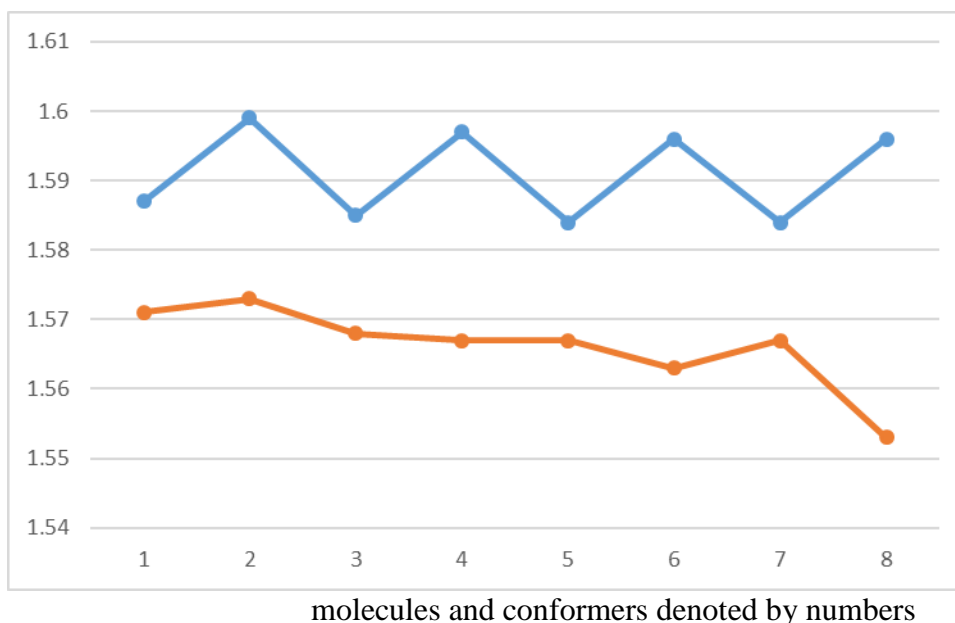

d) Molecules in which the OHs at C2 and C6" are replaced by keto O. The lowest energy conformer pair contain the following IHBs: H15....O14, H15'....O14', H15"....O14", H17'....O8, H16....O10', H16"....O8', H16'....O12".

The molecules and the conformers of their lowest energy pair are denoted by numbers on the x axis, according to the following table:

| molecule              | conformer | number on x axis |
|-----------------------|-----------|------------------|
| T2-KT2,6"-M5,5,3",3"  | 1         | 1                |
|                       | 1-y       | 2                |
| T4-KT2,6"-M5,5,3",3"  | 1         | 3                |
|                       | 1-y       | 4                |
| T5-KT2,6"-M5,5,3",3"  | 1         | 5                |
|                       | 1-y       | 6                |
| T7-KT2,6"-M5,5,3",3"  | 1         | 7                |
|                       | 1-y       | 8                |
| T8-KT2,6"-M5,5,3",3"  | 1         | 9                |
|                       | 1-y       | 10               |
| T9-KT2,6"-M5,5,3",3"  | 1         | 11               |
|                       | 1-y       | 12               |
| T10-KT2,6"-M5,5,3",3" | 1         | 13               |
|                       | 1-y       | 14               |

d) 1) length of the H15...O14 first IHB

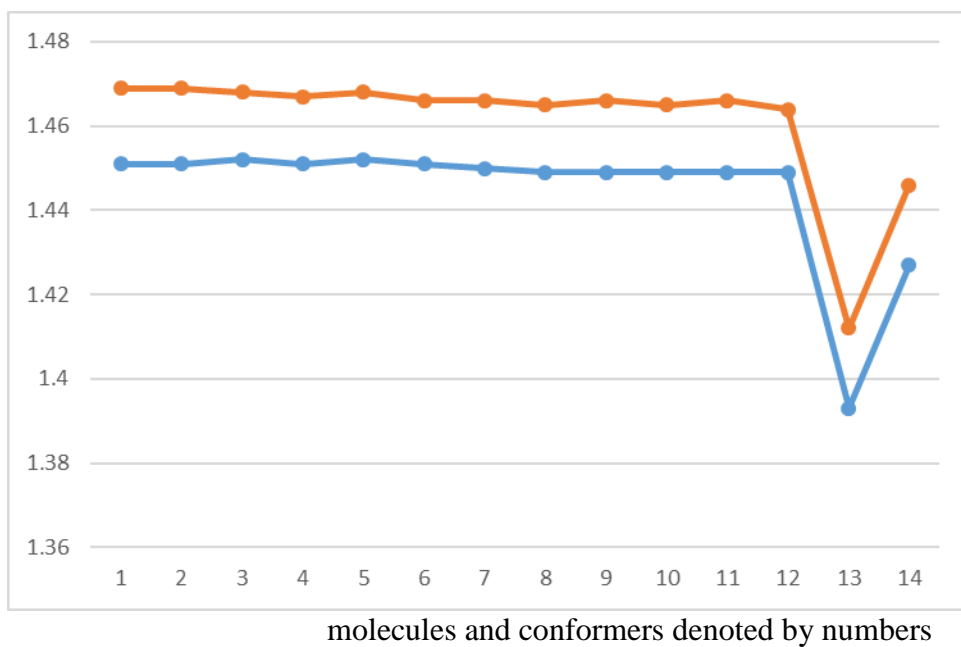

d) 2) length of the H15'...O14' first IHB

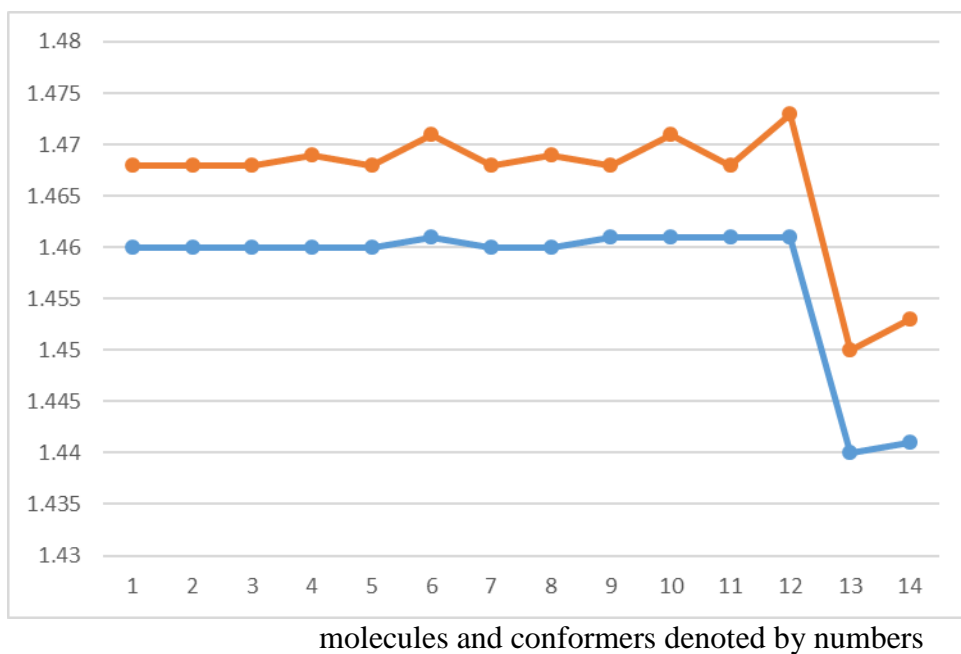

d) 3) length of the H15"....O14" first IHB

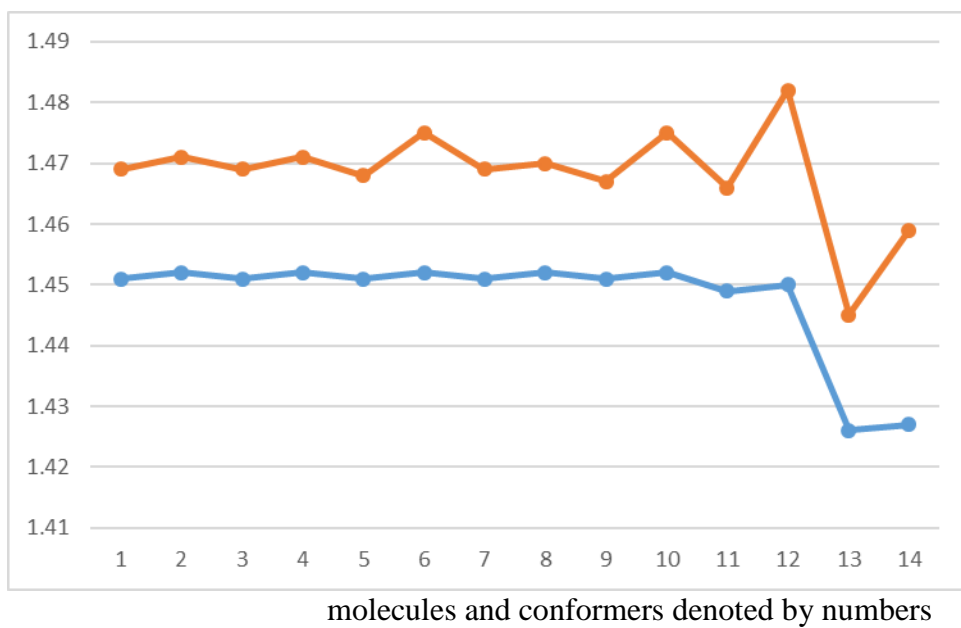

d) 4) length of the H17'....O8 IMHB

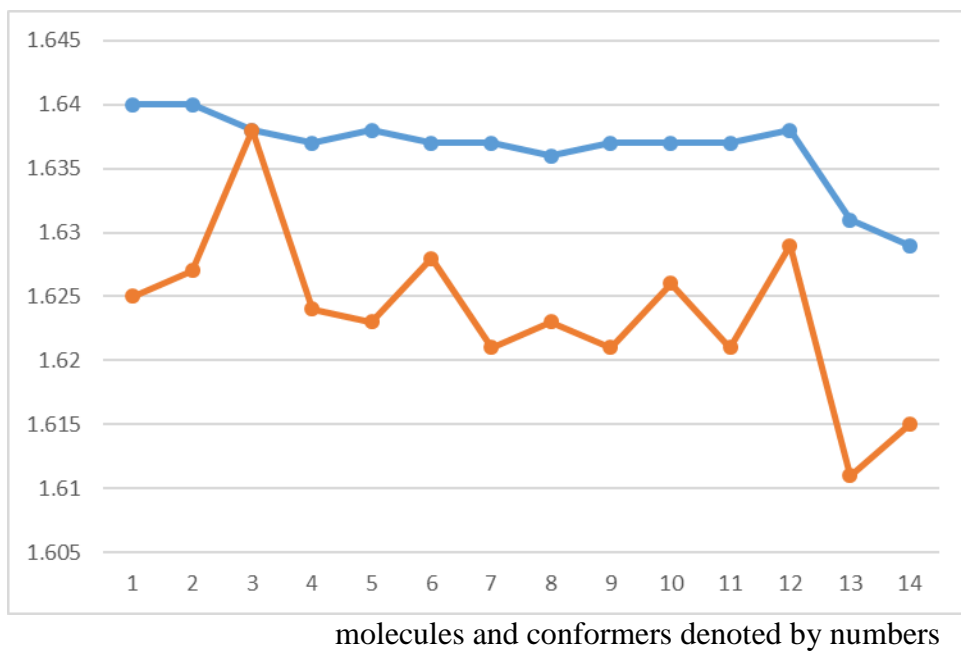

d) 5) length of the H16...O10' IMHB

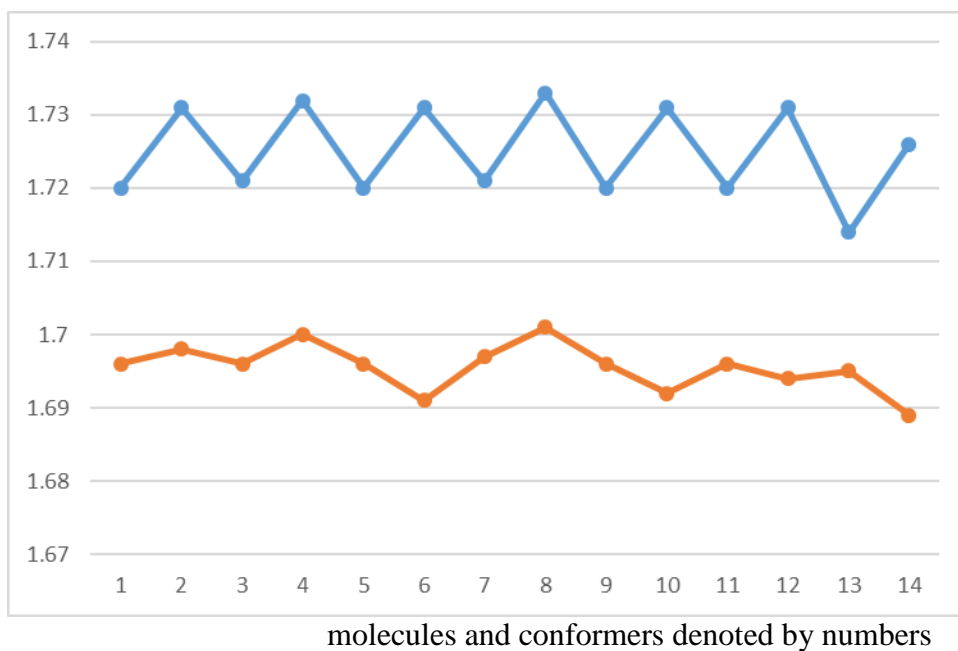

d) 6) length of the H16''...O8' IMHB

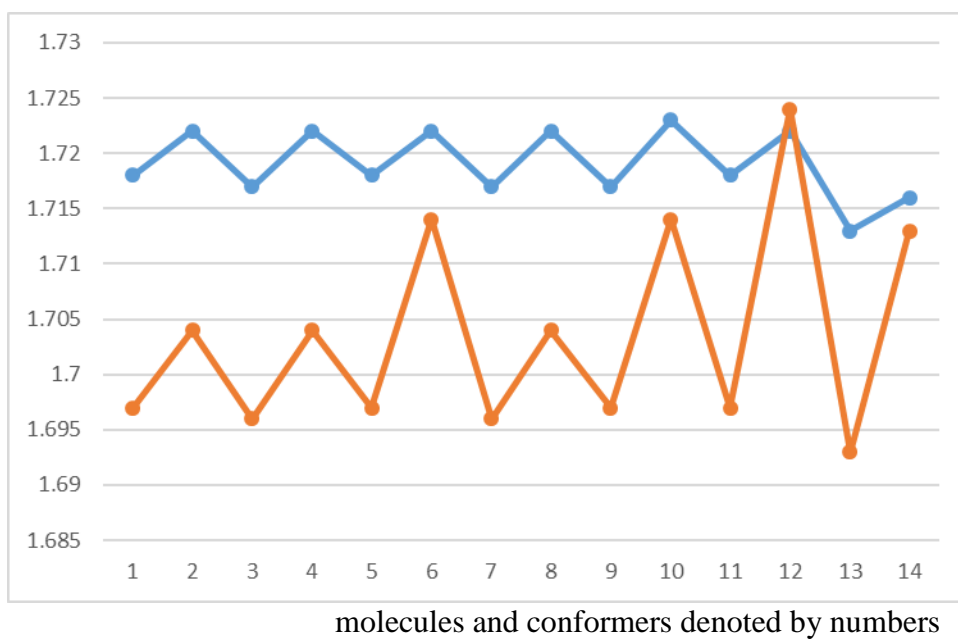

d) 7) length of the H16'....O12" IMHB

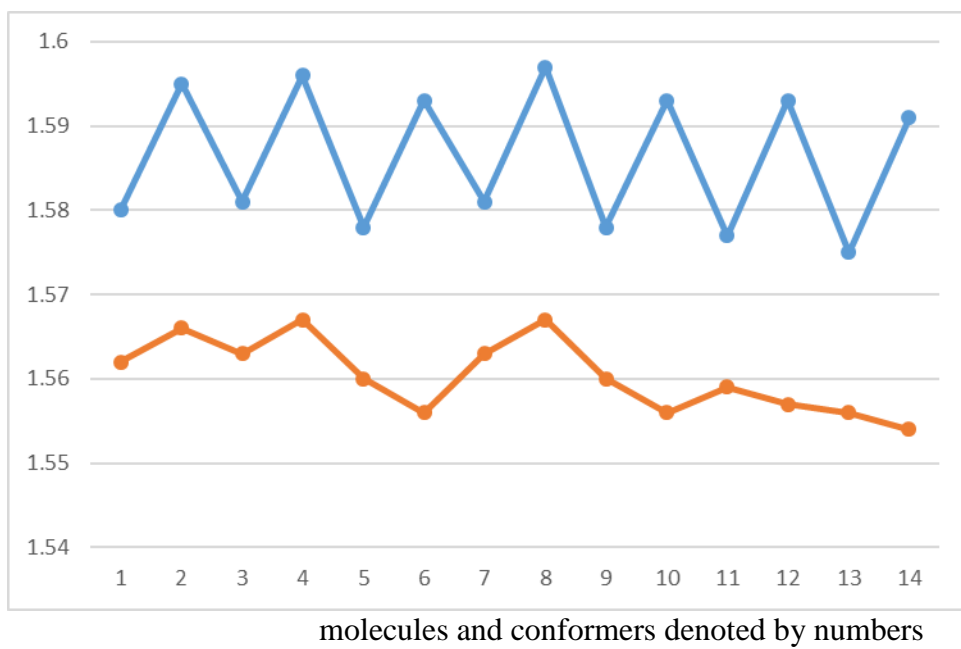

**Figure S 10**

**C–H...O intramolecular hydrogen bonds in trimeric acylphloroglucinols.**

The T4-KT2,6''-M5,5,3'',3''-1 conformer is selected as an example for illustration purposes.

The C–H...O intramolecular hydrogen bonds (IHBs) are indicated by blue segments. The molecule is viewed from different sides, to highlight all the C–H...O IHBs present.

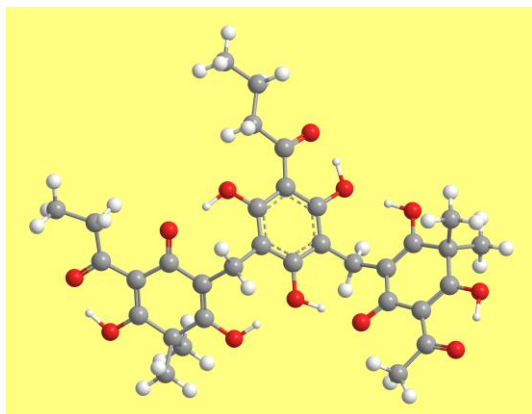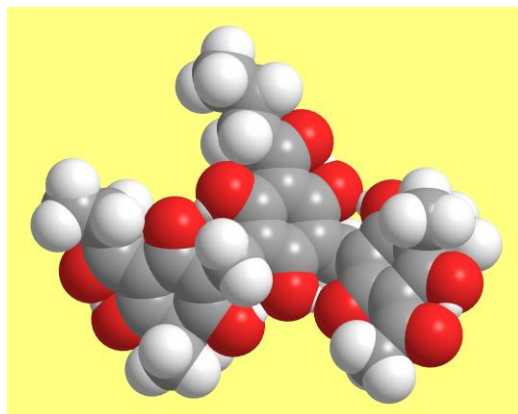

Molecular structure of T4-KT2,6''-M5,5,3'',3'' shown through the geometry of its lowest energy conformer.

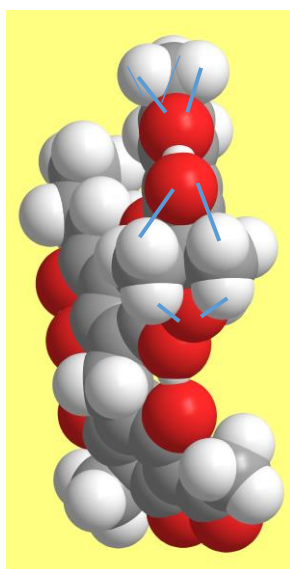

(a)

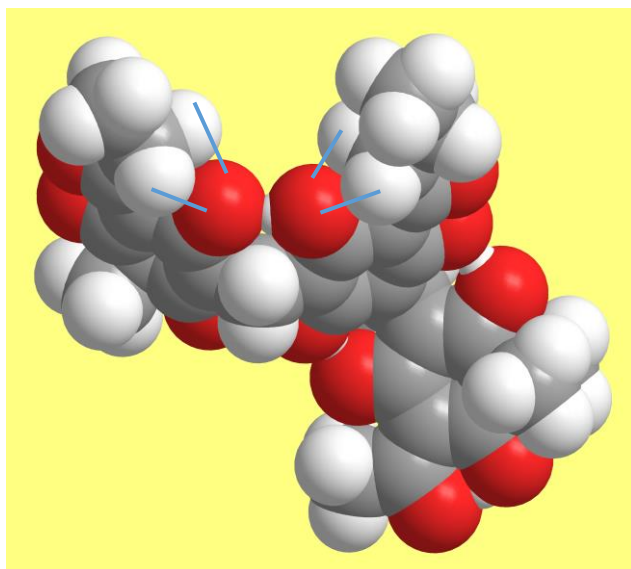

(b)

- a) View from the outer side of the first monomer.  
The H atoms attached to the second C atom of the R chain act as donors to O14 (H19<sub>a</sub>...O14 and H19<sub>b</sub>...O14). One H atom from each of the methyl groups at C5 acts as donor to O12 (H11<sub>a</sub>...O12 and H11<sub>b</sub>...O12); another H atom from each of the methyl groups at C5 acts as donor to O10 (H11<sub>c</sub>...O10 and H11<sub>d</sub>...O10).
- b) View of the part between the first and the second monomer in the upper rim.

The H atoms attached to the first C atom of the R chain act as donors to O8 ( $\text{H13}_a \cdots \text{O8}$  and  $\text{H13}_b \cdots \text{O8}$ ). The H atoms attached to the first C atom of the R' chain act as donors to O12' ( $\text{H13}_a' \cdots \text{O12}'$  and  $\text{H13}_b' \cdots \text{O12}'$ ).

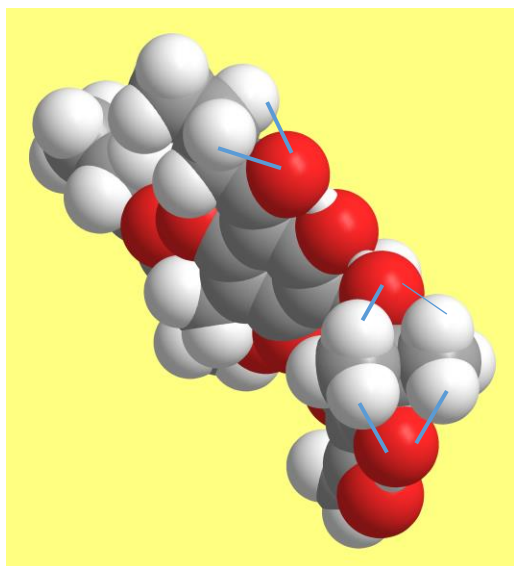

(c)

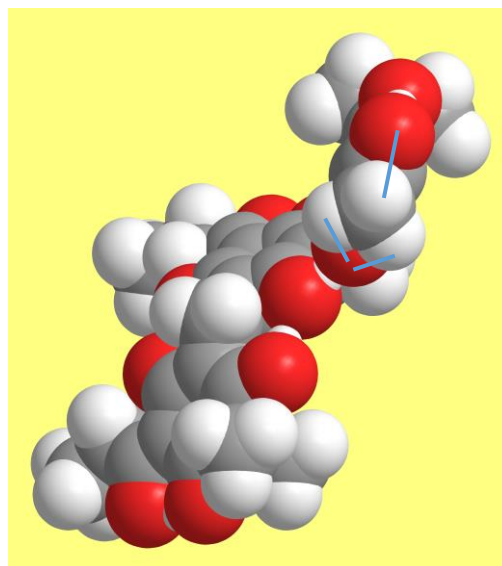

(d)

- c) View of the part between the second and the third monomer in the upper rim.  
The H atoms attached to the second C atom of the R' chain act as donors to O14' ( $\text{H19}_a' \cdots \text{O14}'$  and  $\text{H19}_b' \cdots \text{O14}'$ ). One H atom from each of the methyl groups at C5'' acts as donor to O10'' ( $\text{H9}_c'' \cdots \text{O10}''$  and  $\text{H9}_d'' \cdots \text{O10}''$ ). Another H atom from each of the methyl groups at C5'' acts as donor to O8'' ( $\text{H9}_a'' \cdots \text{O8}''$  and  $\text{H9}_b'' \cdots \text{O8}''$ ).
- d) View from the outer side of the third monomer, towards the bottom rim.  
One of the H atoms attached to the first C atom of the R'' chain acts as donor to O14 ( $\text{H13}_a'' \cdots \text{O14}''$ ), the other two act as donors to O12'' ( $\text{H13}_b'' \cdots \text{O12}''$  and  $\text{H13}_c'' \cdots \text{O12}''$ ).

**Table S 1**

**Common names, natural occurrence and medicinal properties of the naturally occurring trimeric acylphloroglucinols considered in this study**

| Acronym denoting the molecule in this work | Common name                                         | Natural occurrence                                                                           | Medicinal properties           |
|--------------------------------------------|-----------------------------------------------------|----------------------------------------------------------------------------------------------|--------------------------------|
| T2-KT2,6''-M5,5,3'',3''                    | filixic acid ABA                                    | <i>Dryopteris</i> species                                                                    | against influenza              |
| T3-M5,3''-ET6,2''                          | agrimol E                                           | <i>Agrimonia pilosa</i>                                                                      |                                |
| T4-KT2,6''-M5,5,3'',3''                    | filixic acid ABP                                    | <i>Dryopteris</i> species                                                                    |                                |
| T5-KT6''-M3'',3''-ET6                      | trisdesaspidin BPB                                  | <i>Dryopteris subimpressa</i>                                                                |                                |
| T5-KT2,6''-M5,5,3'',3''                    | filixic acid PBP                                    | <i>Dryopteris</i> species                                                                    |                                |
| T6-M5,5'-ET6,4'                            | triaemulin BAB<br>(trisaspidinol BAB)               | <i>Dryopteris aemula</i> ,<br><i>Dryopteris inequalis</i> ,<br><i>Dryopteris erythrosora</i> |                                |
| T7-M5,3''-ET6,2''                          | agrimol F                                           | <i>Agrimonia pilosa</i>                                                                      | antimicrobial,<br>antimalarial |
| T7-KT6''-M5,3'',3''                        | trisflavaspidic acid<br>ABB                         | <i>Dryopteris austriaca</i> ,<br><i>Dryopteris villarii</i> ,<br><i>Dryopteris aitoniana</i> |                                |
| T7-KT2,6''-M5,5,3'',3''                    | filixic acid ABB                                    | <i>Dryopteris</i> species                                                                    | nematocidal,<br>antihelminthic |
| T8-KT6''-M5,3'',3''                        | trisparaspidin PBB                                  | <i>Dryopteris remota</i>                                                                     |                                |
| T8-KT2-M5,5,3''                            | trisparaspidin BBP                                  | <i>Dryopteris remota</i>                                                                     |                                |
| T8-KT2,6''-M5,5,3'',3''                    | filixic acid PBB                                    | <i>Dryopteris</i> species                                                                    |                                |
| T9-M5,5'                                   | trisabbreviatin BBB                                 | <i>Dryopteris abbreviata</i>                                                                 |                                |
| T9-M5,3''-ET6,2''                          | agrimol C                                           | <i>Agrimonia pilosa</i>                                                                      | antimicrobial,<br>antimalarial |
| T9-M5,3''-ET6,4''                          | triaemulin ABB<br>(trisaspidinol ABB)               | <i>Dryopteris aemula</i> ,<br><i>Dryopteris inequalis</i> ,<br><i>Dryopteris erythrosora</i> |                                |
| T9-KT6''-M5,3'',3''                        | trisflavaspidic acid<br>BBB<br>(trisparaspidin BBB) | <i>Dryopteris austriaca</i> ,<br><i>Dryopteris villarii</i> ,<br><i>Dryopteris aitoniana</i> |                                |
| T9-KT6''-M5,3'',3''-ET6                    | triaspidin                                          | <i>Dryopteris austriaca</i> ,                                                                |                                |
| T9-KT6''-M3'',3''-ET4                      | trisdesaspidin BBB                                  | <i>Dryopteris austriaca</i> ,<br><i>Dryopteris caucasica</i> ,                               |                                |



|                           |                    |                                                       |                                |
|---------------------------|--------------------|-------------------------------------------------------|--------------------------------|
| T9-KT2,6''-M5,5,3'',3''   | filixic acid BBB   | <i>Dryopteris</i> species                             |                                |
|                           |                    |                                                       |                                |
| T10-KT2,6''-M5,5, 3'',3'' | japonicin D        | <i>Hypericum japonicum</i><br><i>Agrimonia pilosa</i> | antimicrobial,<br>antimalarial |
| T10-M5,3''-ET6,2'',6''    | protokosin         | <i>Hagenia abyssinica</i>                             | antihelminthic,<br>anticancer  |
| T10-KT2,6''-M5,5, 3'',3'' | japonicin D        | <i>Hypericum japonicum</i>                            |                                |
|                           |                    |                                                       |                                |
| T11-M5,3''-ET6,2''        | agrimol D          | <i>Agrimonia pilosa</i>                               |                                |
|                           |                    |                                                       |                                |
| T12-KT2-M5,5,3''          | trisparaspidin VBB | <i>Dryopteris remota</i>                              |                                |
| T12-KT6''-M5,3'',3''      | trisparaspidin BBV | <i>Dryopteris remota</i>                              |                                |
|                           |                    |                                                       |                                |
| T13-M5,3''-ET6,2''        | agrimol B          | <i>Agrimonia pilosa</i>                               | anticancer                     |
|                           |                    |                                                       |                                |
| T14-M5,3''-ET6,2''        | agrimol A          | <i>Agrimonia pilosa</i>                               |                                |

**Table S 2**  
**Molecular formulas of the calculated trimeric acylphloroglucinols**

| acronym denoting the molecular structure | formula              | acronym denoting the molecular structure | formula              |
|------------------------------------------|----------------------|------------------------------------------|----------------------|
| T1                                       | $C_{26}H_{24}O_{12}$ | T9-M5,3''-ET6,2''                        | $C_{36}H_{44}O_{12}$ |
| T2-KT2,6''-M5,5,3'',3''                  | $C_{32}H_{36}O_{12}$ | T9-M5,3''-ET6,4''                        | $C_{36}H_{44}O_{12}$ |
| T3-ET6,2''                               | $C_{31}H_{34}O_{12}$ | T9-KT6''-M5,3'',3''                      | $C_{35}H_{42}O_{12}$ |
| T3-M5,3''-ET6,2''                        | $C_{33}H_{38}O_{12}$ | T9-KT6''-M3'',3''-ET4                    | $C_{35}H_{42}O_{12}$ |
| T4-KT2,6''-M5,5,3'',3''                  | $C_{33}H_{38}O_{12}$ | T9-KT6''-M5,3'',3''-ET6                  | $C_{36}H_{44}O_{12}$ |
| T5-KT6''-M3'',3''-ET4                    | $C_{33}H_{38}O_{12}$ | T9-KT2,6''-M5,5,3'',3''                  | $C_{36}H_{44}O_{12}$ |
| T5-KT2,6''-M5,5,3'',3''                  | $C_{34}H_{40}O_{12}$ | T10                                      | $C_{32}H_{36}O_{12}$ |
| T6-M5,3''-ET6,4''                        | $C_{34}H_{40}O_{12}$ | T10-ET6,2''                              | $C_{34}H_{40}O_{12}$ |
| T7                                       | $C_{30}H_{32}O_{12}$ | T10-M5,3''-ET6,2''                       | $C_{36}H_{44}O_{12}$ |
| T7-ET6,2''                               | $C_{32}H_{36}O_{12}$ | T10-M5,3''-ET6,2'',6''                   | $C_{37}H_{46}O_{12}$ |
| T7-M5,3''-ET6,2''                        | $C_{34}H_{40}O_{12}$ | T10-KT2,6''-M5,5,3'',3''                 | $C_{36}H_{44}O_{12}$ |
| T7-KT6''-M5,3'',3''                      | $C_{33}H_{38}O_{12}$ | T11-ET6,2''                              | $C_{33}H_{38}O_{12}$ |
| T7-KT2,6''-M5,5,3'',3''                  | $C_{34}H_{40}O_{12}$ | T11-M5,3''-ET6,2''                       | $C_{35}H_{42}O_{12}$ |
| T8-KT6''-M5,3'',3''                      | $C_{34}H_{40}O_{12}$ | T12-KT2-M5,5,3''                         | $C_{36}H_{44}O_{12}$ |
| T8-KT2-M5,5,3''                          | $C_{34}H_{40}O_{12}$ | T12-KT6''-M5,3'',3''                     | $C_{36}H_{44}O_{12}$ |
| T8-KT2,6''-M5,5,3'',3''                  | $C_{35}H_{42}O_{12}$ | T13-ET6,2''                              | $C_{35}H_{42}O_{12}$ |
| T9                                       | $C_{32}H_{36}O_{12}$ | T13-M5,3''-ET6,2''                       | $C_{37}H_{46}O_{12}$ |
| T9-M5,3''                                | $C_{34}H_{40}O_{12}$ | T14-ET6,2''                              | $C_{35}H_{42}O_{12}$ |
| T9-ET6,2''                               | $C_{34}H_{40}O_{12}$ | T14-M5,3''-ET6,2''                       | $C_{37}H_{46}O_{12}$ |

**Table S 3****Viable combinations of monomers' conformer types in trimeric acylphloroglucinols.**

Each combination corresponds to a viable conformer for trimeric acylphloroglucinols (T-ACPL). Monomer combinations are considered viable if they enable the formation of two hydrogen bonds between each pair of monomers, on either side of the methylene bridge joining them.

The combinations of monomers' geometries differ by the mutual orientations of the monomers (identified in terms of positions of the acyl chains with respect to each other), by the geometries of the individual monomers and by the mutual orientations of the methylene bridges.

The mutual positions of the acyl chains are conventionally indicated as *up* or *down*, starting from the monomer conventionally taken as 'first monomer', whose orientation is taken as *up*. For T-ACPLs with different R chains in the outer monomers ( $R \neq R''$ ), the 'first monomer' is taken as the outer monomer with the longer R.

The conformers of individual monomers are denoted with the same symbols utilized in the study of monomeric acylphloroglucinols [4–6] and summarized in figure 3.

The T-ACPL conformers are numbered on the basis of their most recurrent positions in the increasing relative energy sequence.

The mutual orientations of the two methylene bridges give origin to outstretched-shaped geometries if they are oriented in opposite ways and to half-bowl-shaped geometries if they are oriented in the same way; the latter are identified by adding the letter y to the number denoting the conformer. Since the other geometry aspects (conformations of individual monomers and mutual orientations of the acyl chains) are the same for such pairs of conformers, the table reports only the conformers' numbers and the geometry aspects corresponding to each number. Both shapes corresponding to each number are shown in figures S1, S2, S4, S5 and S6.

**a) Combinations when no phenol OH is replaced by other functions**

The geometries are illustrated in figure S1.

| number denoting the conformer | conformations of individual monomers |                |               | mutual orientations of the acyl chains |                |               |
|-------------------------------|--------------------------------------|----------------|---------------|----------------------------------------|----------------|---------------|
|                               | first monomer                        | second monomer | third monomer | first monomer                          | second monomer | third monomer |
| 1                             | d-r                                  | s-w            | s-w           | up                                     | down           | down          |
| 2                             | d-r                                  | s-w            | d-r           | up                                     | down           | up            |
| 3                             | d-r                                  | d-r            | d-r           | up                                     | up             | up            |
| 4                             | d-r-u                                | s-w            | s-w           | up                                     | down           | down          |
| 5                             | d-r-u                                | s-w            | d-r           | up                                     | down           | up            |
| 6                             | s-w                                  | d-r            | d-r           | up                                     | down           | down          |
| 7                             | d-r-u                                | d-r            | d-r           | up                                     | up             | up            |
| 8                             | d-r                                  | s-w            | d-r-u         | up                                     | down           | down          |
| 9                             | d-r-u                                | s-w            | s-w-u         | up                                     | down           | down          |
| 10                            | d-r                                  | d-r            | d-w-u         | up                                     | up             | down          |

|    |       |       |       |    |      |      |
|----|-------|-------|-------|----|------|------|
| 11 | d-w   | d-w   | d-w   | up | up   | up   |
| 12 | d-r   | s-w-u | d-w   | up | down | up   |
| 13 | s-w   | s-w   | d-w-u | up | up   | up   |
| 14 | d-r-u | s-w   | d-w-u | up | down | down |
| 15 | d-w   | d-w   | d-w   | up | up   | down |
| 16 | d-r-u | d-r   | d-r-u | up | up   | down |
| 17 | d-w   | d-w   | d-w   | up | down | down |
| 18 | d-w   | d-r   | d-w   | up | down | up   |
| 19 | d-w-u | d-w   | d-w   | up | up   | up   |
| 20 | d-w-u | d-w   | d-w   | up | down | down |
| 21 | d-w-u | d-w   | d-w   | up | up   | down |
| 22 | d-w-u | d-w   | d-w   | up | down | up   |
| 23 | d-r-u | s-w-u | d-w   | up | down | up   |
| 24 | d-r-u | s-w-u | d-w   | up | down | down |
| 25 | s-w-u | d-w   | d-w   | up | down | down |
| 26 | s-w   | d-w-u | d-w   | up | up   | down |
| 27 | s-w-u | d-w   | d-w   | up | up   | up   |
| 28 | s-w-u | d-w   | d-w   | up | down | up   |
| 29 | s-w-u | d-w   | d-w   | up | up   | down |

- b) Combination when the OH at C6 and C2'' are replaced by OCH<sub>3</sub> functions**  
One combination is viable and is numbered as 1. (additional explanation in fig. S3).

| number denoting the conformer | conformations of individual monomers |                |               | mutual orientations of the acyl chains |                |               |
|-------------------------------|--------------------------------------|----------------|---------------|----------------------------------------|----------------|---------------|
|                               | first monomer                        | second monomer | third monomer | first monomer                          | second monomer | third monomer |
| 1                             | d-r                                  | d-r            | s-w           | up                                     | up             | down          |

c) **Combination when the OH at C6 and C4'' are replaced by OCH<sub>3</sub> functions**

One combination is viable and is numbered as 1. Different geometries of the bowl-shaped conformer (1-y) arise according to whether the OCH<sub>3</sub> groups are oriented towards the concave (inner) or the convex (outer) side of the bowl.

| number denoting the conformer | conformations of individual monomers |                |               | mutual orientations of the acyl chains |                |               |
|-------------------------------|--------------------------------------|----------------|---------------|----------------------------------------|----------------|---------------|
|                               | first monomer                        | second monomer | third monomer | first monomer                          | second monomer | third monomer |
| 1                             | d-r                                  | d-r            | d-r           | up                                     | up             | up            |

d) **Combinations when the OH at C6'' is replaced by a keto O.**

The conformers' numbering is independent of the one shown in table (a), because different (and fewer) combinations of monomeric conformers are possible, due to the presence of the keto O at C6'', i.e., in a position concerned with the first IHB and with the intermonomer H-bonds. The combinations are shown in fig. S5.

| number denoting the conformer | conformations of individual monomers |                |               | mutual orientations of the acyl chains |                |               |
|-------------------------------|--------------------------------------|----------------|---------------|----------------------------------------|----------------|---------------|
|                               | first monomer                        | second monomer | third monomer | first monomer                          | second monomer | third monomer |
| 1                             | d-r                                  | d-r            | d-w           | up                                     | up             | down          |
| 2                             | d-r                                  | s-w            | d-w           | up                                     | down           | down          |
| 3                             | s-w                                  | d-r            | d-w           | up                                     | down           | up            |
| 4                             | s-w                                  | s-w            | d-w           | up                                     | up             | up            |
| 5                             | s-r                                  | d-r-u          | d-w           | up                                     | down           | up            |
| 6                             | s-r                                  | d-r-u          | d-w           | up                                     | up             | down          |
| 7                             | s-r                                  | s-r            | d-r           | up                                     | up             | up            |
| 8                             | s-r                                  | s-r            | d-r           | up                                     | down           | down          |
| 9                             | s-r                                  | s-r            | d-r           | up                                     | up             | down          |
| 10                            | s-r                                  | s-r            | d-r           | up                                     | down           | up            |

e) **Combinations when the OH at C2 is replaced by a keto O.**

Similarly to case (d), the conformers' numbering is independent of the one shown in table (a) because different (and fewer) combinations of monomeric conformers are possible, due to the presence of the keto O at C2, i.e., in a position concerned with the first IHB and with an intermonomer H-bond. They mostly reflect situations symmetric to those included in table (d). The geometries are illustrated in fig. S5.

| number denoting the conformer | conformations of individual monomers |                |               | mutual orientations of the acyl chains |                |               |
|-------------------------------|--------------------------------------|----------------|---------------|----------------------------------------|----------------|---------------|
|                               | first monomer                        | second monomer | third monomer | first monomer                          | second monomer | third monomer |
| 1                             | s-r                                  | s-w            | s-w           | up                                     | down           | down          |
| 2                             | s-r                                  | d-r            | s-w           | up                                     | up             | down          |
| 3                             | s-r                                  | s-w            | d-r           | up                                     | down           | up            |
| 4                             | s-r                                  | d-r            | d-r           | up                                     | up             | up            |
| 5                             | s-r                                  | s-w-u          | d-w           | up                                     | down           | up            |
| 6                             | s-r                                  | s-w-u          | d-w           | up                                     | down           | down          |
| 7                             | s-w                                  | d-w            | d-w           | up                                     | up             | up            |
| 8                             | s-w                                  | d-w            | d-w           | up                                     | up             | down          |
| 9                             | s-r                                  | s-w            | d-r           | up                                     | down           | up            |
| 10                            | s-w                                  | d-w            | d-w           | up                                     | down           | up            |

f) **Combination when the OHs at C2 and C6'' are both replaced by keto O**

One combination is viable and is numbered as 1.

| number denoting the conformer | conformations of individual monomers |                |               | mutual orientations of the acyl chains |                |               |
|-------------------------------|--------------------------------------|----------------|---------------|----------------------------------------|----------------|---------------|
|                               | first monomer                        | second monomer | third monomer | first monomer                          | second monomer | third monomer |
| 1                             | s-r                                  | d-r            | d-w           | up                                     | up             | down          |

**g) Combination when the OH at C6'' is replaced by a keto O and the OH at C4 is replaced by a CH<sub>3</sub>O group.**

One combination is viable and is numbered as 1.

| number<br>denoting<br>the<br>conformer | conformations of individual monomers |                   |                  | mutual orientations of the acyl chains |                   |                  |
|----------------------------------------|--------------------------------------|-------------------|------------------|----------------------------------------|-------------------|------------------|
|                                        | first<br>monomer                     | second<br>monomer | third<br>monomer | first<br>monomer                       | second<br>monomer | third<br>monomer |
| 1                                      | s-w                                  | s-w               | d-w              | up                                     | up                | up               |

**Table S 4****Relative energies of the calculated conformers of trimeric acylphloroglucinols.**

The table reports the HF/6-31G(d,p), HF/6-31+G(d,p), DFT/B3LYP/6-31+G(d,p), and DFT/B3LYP/6-31+G(d,p) with the Grimme' corrections results, respectively denoted as HF, HF+, DFT and DFT-D3 in the column headings.

For each molecule, the conformers are listed in order of increasing relative energy in the DFT/B3LYP/6-31+G(d,p) results.

Two different tables are presented, respectively grouping the molecules according to their acyl groups or according to their other substituents.

**a) The molecules are grouped according to their acyl groups**

| conformers          | relative energy (kcal/mol) |        |        |        |
|---------------------|----------------------------|--------|--------|--------|
|                     | HF                         | HF+    | DFT    | DFT-D3 |
| <b>structure T1</b> |                            |        |        |        |
| 1                   | 0.000                      | 0.000  | 0.000  | 0.000  |
| 1-y                 | 0.282                      | 0.285  | 0.325  | 0.093  |
| 2                   | 2.477                      | 2.470  | 3.432  | 2.844  |
| 2-y                 | 2.580                      | 2.530  | 3.545  | 3.469  |
| 3                   | 2.630                      | 2.657  | 3.766  | 3.843  |
| 3-y                 | 2.667                      | 2.711  | 3.794  | 3.604  |
| 4                   | 5.220                      | 5.358  | 3.858  | 3.843  |
| 4-y                 | 5.462                      | 5.591  | 4.166  | 3.868  |
| 5                   | 7.686                      | 7.821  | 7.281  | 7.301  |
| 6                   | 5.223                      | 5.218  | 7.366  | 7.429  |
| 5-y                 | 7.792                      | 7.874  | 7.375  | 6.480  |
| 7                   | 7.688                      | 7.793  | 7.424  | 7.447  |
| 7-y                 | 7.755                      | 7.884  | 7.450  | 7.257  |
| 8                   | 8.154                      | 8.151  |        |        |
| 8-y                 | 8.336                      | 8.339  | 7.465  | 7.106  |
| 6-y                 | 5.367                      | 5.389  | 7.496  | 7.160  |
| 9                   | 10.381                     | 10.585 | 7.585  | 7.554  |
| 10-y                | 8.918                      | 8.920  | 7.717  | 7.141  |
| 10                  | 8.434                      | 8.486  | 7.768  | 7.737  |
| 9-y                 | 10.506                     | 10.714 | 7.813  | 7.471  |
| 11-y                | 8.532                      | 8.502  | 10.381 | 10.015 |
| 12-y                | 10.926                     | 10.961 | 10.598 | 9.566  |
| 12                  | 10.962                     | 10.859 | 10.685 | 10.669 |
| 13                  | 10.690                     | 10.712 | 11.006 | 10.959 |
| 13-y                | 10.801                     | 10.864 | 11.053 | 10.755 |
| 14                  | 13.323                     | 13.458 | 11.073 | 11.030 |



|                                       |        |        |        |        |
|---------------------------------------|--------|--------|--------|--------|
| 14-y                                  | 13.425 | 13.544 | 11.180 | 10.795 |
| 15-y                                  | 9.342  | 9.356  | 11.278 | 10.884 |
| 16-y                                  | 13.990 | 14.076 | 11.310 | 10.712 |
| 16                                    | 13.449 | 13.578 | 11.386 | 11.339 |
| 11                                    | 9.563  | 9.450  | 11.571 | 11.737 |
| 17-y                                  | 9.677  | 9.597  | 11.608 | 11.360 |
| 18-y                                  | 9.879  | 9.597  | 11.869 | 10.961 |
| 17                                    | 10.079 | 9.871  | 11.946 | 12.121 |
| 15                                    | 10.143 | 10.097 | 12.100 | 12.258 |
| 19-y                                  | 12.557 | 12.671 | 13.131 | 12.831 |
| 18                                    | 10.344 | 10.192 | 12.199 | 12.348 |
| 20-y                                  | 13.093 | 13.126 | 13.777 | 13.483 |
| 21-y                                  | 13.317 | 13.438 | 13.946 | 13.608 |
| 22-y                                  | 13.367 | 13.448 | 14.074 | 11.810 |
| 19                                    | 13.391 | 13.395 | 14.119 | 14.279 |
| 23-y                                  | 15.782 | 15.825 | 14.276 | 12.134 |
| 20                                    | 13.708 | 13.661 | 14.304 | 14.469 |
| 23                                    | 16.071 | 16.286 | 14.432 | 14.399 |
| 22                                    | 14.010 | 14.019 | 14.594 | 14.734 |
| 21                                    | 13.935 | 13.998 | 14.610 | 14.765 |
| 24-y                                  | 16.354 | 16.419 | 14.757 | 14.425 |
| 24                                    | 16.734 | 16.827 | 14.827 | 14.867 |
| 25-y                                  | 14.307 | 14.452 | 15.447 | 13.171 |
| 26                                    | 14.864 | 14.843 | 15.983 | 15.991 |
| 27-y                                  | 15.334 | 15.491 | 16.033 | 15.671 |
| 26-y                                  | 14.965 | 14.960 | 16.049 | 15.701 |
| 25                                    | 15.285 | 15.304 | 16.507 | 16.633 |
| 28-y                                  | 15.581 | 15.333 | 16.598 | 14.442 |
| 29                                    | 16.280 | 16.467 | 16.809 | 16.942 |
| 29-y                                  | 15.958 | 16.225 | 16.831 | 16.482 |
| 28                                    | 15.876 | 15.961 | 17.100 | 17.146 |
| 27                                    | 15.756 | 15.880 | 17.246 | 17.363 |
| <b>structure T2-KT2,6"-M5,5,3",3"</b> |        |        |        |        |
| 1                                     | 0.000  | 0.000  | 0.000  | 0.172  |
| 1-y                                   | 0.391  | 0.392  | 0.385  | 0.000  |
| <b>structure T3-ET6,2"</b>            |        |        |        |        |
| 1                                     | 0.158  | 0.000  | 0.000  | 0.154  |
| 1-y                                   | 0.000  | 0.200  | 0.485  | 0.000  |
| <b>structure T3-M5,3"-ET6,2"</b>      |        |        |        |        |
| 1                                     | 0.030  | 0.015  | 0.000  | 0.329  |
| 1-y                                   | 0.000  | 0.000  | 0.028  | 0.000  |

|                                       |       |       |       |       |
|---------------------------------------|-------|-------|-------|-------|
| <b>structure T4-KT2,6"-M5,5,3",3"</b> |       |       |       |       |
| 1                                     | 0.000 | 0.000 | 0.000 | 0.177 |
| 1-y                                   | 0.389 | 0.389 | 0.383 | 0.000 |
| <b>structure T5-KT2,6"-M5,5,3",3"</b> |       |       |       |       |
| 1                                     | 0.000 | 0.000 | 0.000 | 0.330 |
| 1-y                                   | 0.387 | 0.384 | 0.370 | 0.000 |
| <b>structure T5-KT6"-M3",3"-ET2"</b>  |       |       |       |       |
| 1                                     | 0.000 | 0.004 | 0.000 | 0.454 |
| 1-y                                   | 0.017 | 0.000 | 0.086 | 0.000 |
| <b>structure T6-M5,3"-ET6,4"</b>      |       |       |       |       |
| 3                                     | 0.000 | 0.000 | 0.000 | 0.195 |
| 3-y-out-out                           | 0.209 | 0.195 | 0.141 | 0.000 |
| 3-y-in-out                            | 0.220 | 0.184 | 0.190 | 0.030 |
| 3-y-in-in                             | 3.310 | 4.231 | 4.737 | 2.823 |
| <b>structure T7</b>                   |       |       |       |       |
| 1                                     | 0.000 | 0.000 | 0.000 | 0.000 |
| 1-y                                   | 0.280 | 0.285 | 1.007 | 0.331 |
| 2                                     | 2.439 | 2.460 | 3.467 | 3.419 |
| 2-y                                   | 2.534 | 2.500 | 3.626 | 1.852 |
| 4                                     | 4.997 | 5.106 | 3.636 | 3.509 |
| 3                                     | 2.600 | 2.621 | 3.837 | 3.834 |
| 3-y                                   | 2.636 | 2.671 | 3.863 | 3.584 |
| 4-y                                   | 5.235 | 5.337 | 3.946 | 3.516 |
| 5                                     | 7.419 | 7.551 | 7.001 | 6.867 |
| 5-y                                   | 7.491 | 7.580 | 7.121 | 5.435 |
| 6                                     | 5.299 | 5.270 | 7.372 | 7.317 |
| 6-y                                   | 5.220 | 5.317 | 7.448 | 6.199 |
| <b>structure T7-ET6,2"</b>            |       |       |       |       |
| 1                                     | 0.000 | 0.000 | 0.000 | 0.000 |
| 1-y                                   | 0.296 | 0.307 | 0.347 | 0.046 |
| <b>structure T7-M5,3"-ET6,2"</b>      |       |       |       |       |
| 1                                     | 0.000 | 0.000 | 0.000 | 0.188 |
| 1-y                                   | 0.201 | 0.181 | 0.279 | 0.000 |
| <b>structure T7-KT6"-M5,3",3"</b>     |       |       |       |       |
| 1                                     | 0.000 | 0.000 | 0.000 | 0.219 |
| 1-y                                   | 0.260 | 0.306 | 0.287 | 0.000 |
| 2                                     | 0.433 | 0.498 | 0.610 | 0.816 |
| 2-y                                   | 0.623 | 0.664 | 0.898 | 0.612 |

|                                       |        |        |        |        |
|---------------------------------------|--------|--------|--------|--------|
| 3                                     | 2.003  | 2.007  | 2.911  | 3.077  |
| 3-y                                   | 2.276  | 2.282  | 3.226  | 1.275  |
| 4                                     | 2.884  | 2.968  | 4.168  | 4.373  |
| 4-y                                   | 2.950  | 3.054  | 4.311  | 4.088  |
| 5                                     | 10.137 | 10.104 | 10.196 | 10.216 |
| 5-y                                   | 9.896  | 9.828  | 10.249 | 8.521  |
| 6                                     | 10.570 | 10.582 | 10.510 | 9.925  |
| 6-y                                   | 10.662 | 10.644 | 10.602 | 10.698 |
| 7-y                                   | 12.073 | 11.902 | 14.387 | 12.814 |
| 7                                     | 13.251 | 13.016 | 15.573 | 15.611 |
| 8-y                                   | 12.948 | 12.698 | 15.114 | 12.780 |
| 9-y                                   | 13.161 | 13.044 | 15.141 | 13.766 |
| 10-y                                  | 13.341 | 13.085 | 15.474 | 13.043 |
| 9                                     | 13.594 | 13.282 | 15.595 | 15.707 |
| 10                                    | 13.698 | 13.426 | 15.732 | 15.777 |
| 8                                     | 13.743 | 13.556 | 15.982 | 15.980 |
| <b>structure T7-KT2,6"-M5,5,3",3"</b> |        |        |        |        |
| 1                                     | 0.000  | 0.000  | 0.000  | 0.140  |
| 1-y                                   | 0.390  | 0.391  | 0.384  | 0.000  |
| <b>structure T8-KT6"-M5,3",3"</b>     |        |        |        |        |
| 1                                     | 0.000  | 0.000  | 0.000  | 0.324  |
| 1-y                                   | 0.268  | 0.307  | 0.249  | 0.000  |
| 2                                     | 0.436  | 0.502  | 0.574  | 0.882  |
| 2-y                                   | 0.627  | 0.668  | 0.860  | 0.694  |
| 3                                     | 1.998  | 1.996  | 2.856  | 3.118  |
| 3-y                                   | 2.281  | 2.267  | 3.242  | 0.981  |
| 4                                     | 2.878  | 2.956  | 4.108  | 4.418  |
| 4-y                                   | 2.941  | 3.039  | 4.252  | 4.127  |
| 5                                     | 10.092 | 9.962  | 10.086 | 10.186 |
| 5-y                                   | 9.844  | 9.765  | 10.179 | 7.885  |
| 6-y                                   | 10.423 | 10.375 | 10.400 | 9.517  |
| 6                                     | 10.644 | 10.548 | 10.508 | 10.705 |
| 7-y                                   | 11.986 | 11.836 | 14.203 | 12.742 |
| 9-y                                   | 13.288 | 12.964 | 14.931 | 13.121 |
| 8-y                                   | 12.858 | 12.584 | 14.931 | 12.718 |
| 10-y                                  | 13.132 | 12.922 | 15.319 | 11.967 |
| 9                                     | 13.479 | 13.183 | 15.386 | 15.595 |
| 7                                     | 13.163 | 12.939 | 15.428 | 15.518 |
| 10                                    | 13.585 | 13.296 | 15.552 | 15.657 |
| 8                                     | 13.653 | 13.438 | 15.791 | 15.885 |
| <b>structure T8-KT2-M5,5,3"</b>       |        |        |        |        |
| 1                                     | 0.000  | 0.000  | 0.000  | 0.670  |

|                                       |        |        |        |        |
|---------------------------------------|--------|--------|--------|--------|
| 1-y                                   | 0.262  | 0.305  | 0.274  | 0.000  |
| 2                                     | 0.440  | 0.460  | 0.538  | 1.232  |
| 2-y                                   | 0.630  | 0.665  | 0.834  | 1.049  |
| 3-y                                   | 3.807  | 3.784  | 3.060  | 1.272  |
| 4                                     | 2.188  | 2.155  | 4.039  | 4.727  |
| 3                                     | 3.571  | 3.584  | 4.041  | 3.568  |
| 4-y                                   | 2.923  | 2.932  | 4.135  | 4.427  |
| 5                                     | 10.090 | 9.981  | 10.056 | 10.571 |
| 5-y                                   | 10.291 | 9.742  | 10.165 | 8.747  |
| 6-y                                   | 10.372 | 10.321 | 10.399 | 9.376  |
| 6                                     | 10.635 | 10.442 | 10.460 | 11.078 |
| 7-y                                   | 11.970 | 11.731 | 14.173 | 13.017 |
| 9-y                                   | 13.031 | 12.867 | 14.803 | 13.004 |
| 8-y                                   | 12.841 | 12.564 | 14.875 | 13.816 |
| 9                                     | 13.453 | 13.075 | 15.279 | 15.894 |
| 7                                     | 13.130 | 12.824 | 15.317 | 15.848 |
| 8                                     | 13.667 | 13.462 | 15.770 | 16.282 |
| 10-y                                  | 14.872 | 14.603 | 16.453 | 12.839 |
| 10                                    | 15.169 | 14.859 | 16.749 | 16.064 |
| <b>structure T8-KT2,6"-M5,5,3",3"</b> |        |        |        |        |
| 1                                     | 0.000  | 0.000  | 0.000  | 0.336  |
| 1-y                                   | 0.387  | 0.422  | 0.373  | 0.000  |
| <b>structure T9</b>                   |        |        |        |        |
| 1                                     | 0.000  | 0.000  | 0.000  | 0.000  |
| 1-y                                   | 0.275  | 0.280  | 0.319  | 0.020  |
| 2                                     | 2.509  | 2.516  | 3.452  | 3.401  |
| 4                                     | 4.994  | 5.103  | 3.632  | 3.506  |
| 2-y                                   | 2.599  | 2.581  | 3.655  | 1.229  |
| 3                                     | 2.672  | 2.708  | 3.810  | 3.805  |
| 3-y                                   | 2.710  | 2.763  | 3.836  | 3.555  |
| 4-y                                   | 5.228  | 5.328  | 3.933  | 3.501  |
| 5                                     | 7.487  | 7.605  | 7.067  | 6.888  |
| 5-y                                   | 7.553  | 7.631  | 7.252  | 4.307  |
| 6                                     | 5.859  | 5.349  | 7.419  | 7.370  |
| 6-y                                   | 5.360  | 5.391  | 7.503  | 6.181  |
| <b>structure T9-M5,3"</b>             |        |        |        |        |
| 1                                     | 0.000  | 0.000  | 0.000  | 0.134  |
| 1-y                                   | 0.225  | 0.216  | 0.266  | 0.000  |
| 2                                     | 1.998  | 2.028  | 2.866  | 2.936  |
| 2-y                                   | 2.073  | 2.029  | 3.067  | 0.657  |
| 3                                     | 2.247  | 2.251  | 3.323  | 3.437  |
| 3-y                                   | 2.269  | 2.309  | 3.356  | 3.084  |

|                                      |        |        |        |        |
|--------------------------------------|--------|--------|--------|--------|
| 4                                    | 4.626  | 4.738  | 3.654  | 3.687  |
| 4-y                                  | 4.837  | 4.935  | 3.934  | 3.564  |
| 6                                    | 4.282  | 4.292  | 6.240  | 6.287  |
| 6-y                                  | 4.323  | 4.365  | 6.358  | 4.689  |
| 5                                    | 6.598  | 6.707  | 6.479  | 6.446  |
| 5-y                                  | 6.656  | 6.658  | 6.687  | 3.754  |
| <b>structure T9-ET6,2"</b>           |        |        |        |        |
| 1                                    | 0.000  | 0.000  | 0.000  | 0.000  |
| 1-y                                  | 0.293  | 0.299  | 0.346  | 0.025  |
| <b>structure T9-M5,3"-ET6,2"</b>     |        |        |        |        |
| 1                                    | 0.000  | 0.000  | 0.000  | 0.195  |
| 1-y                                  | 0.199  | 0.176  | 0.279  | 0.000  |
| <b>structure T9-M5,3"-ET6,4"</b>     |        |        |        |        |
| 3                                    | 0.000  | 0.000  | 0.000  | 0.150  |
| 3-y                                  | 0.210  | 0.195  | 0.186  | 0.000  |
| 3-y-in-out                           | 0.218  | 0.183  |        | 0.030  |
| 3-y-in-in                            | 3.294  | 4.216  | 4.738  | 2.773  |
| <b>structure T9-KT6"-M5,3",3"</b>    |        |        |        |        |
| 1                                    | 0.000  | 0.000  | 0.000  | 0.672  |
| 1-y                                  | 0.261  | 0.352  | 0.266  | 0.000  |
| 2                                    | 0.439  | 0.545  | 0.544  | 1.196  |
| 2-y                                  | 0.630  | 0.711  | 0.868  | 1.040  |
| 3                                    | 1.996  | 2.035  | 2.853  | 3.452  |
| 4                                    | 2.878  | 2.995  | 4.070  | 4.725  |
| 4-y                                  | 2.941  | 3.037  | 4.210  | 4.431  |
| 3-y                                  | 2.756  | 2.854  | 4.268  | 1.817  |
| 6-y                                  | 11.266 | 11.341 | 11.730 | 10.476 |
| 5                                    | 11.424 | 11.406 | 11.914 | 12.378 |
| 6                                    | 11.485 | 11.467 | 11.948 | 12.575 |
| 5-y                                  | 11.265 | 11.238 | 12.251 | 9.837  |
| 7-y                                  | 11.961 | 11.806 | 14.162 | 13.040 |
| 9-y                                  | 12.961 | 12.968 | 14.865 | 13.019 |
| 8-y                                  | 12.831 | 12.594 | 14.899 | 12.981 |
| 9                                    | 13.451 | 13.194 | 15.349 | 15.900 |
| 7                                    | 13.136 | 12.950 | 15.391 | 15.858 |
| 10                                   | 13.555 | 13.338 | 15.465 | 15.931 |
| 8                                    | 13.645 | 13.484 | 15.794 | 16.220 |
| 10-y                                 | 12.933 | 12.893 | 15.949 | 13.576 |
| <b>structure T9-KT6"-M3",3"-ET2"</b> |        |        |        |        |
| 1                                    | 0.000  | 0.004  | 0.000  | 0.457  |

|                                        |       |       |       |       |
|----------------------------------------|-------|-------|-------|-------|
| 1-y                                    | 0.017 | 0.000 | 0.085 | 0.000 |
| <b>structure T9-KT6"-M5,3",3"-ET2"</b> |       |       |       |       |
| 1                                      | 0.000 | 0.000 | 0.000 | 0.000 |
| 1-y                                    | 0.182 | 0.157 | 0.530 | 0.043 |
| <b>structure T9-KT2,6"-M5,5,3",3"</b>  |       |       |       |       |
| 1                                      | 0.000 | 0.000 | 0.000 | 0.962 |
| 1-y                                    | 0.383 | 0.387 | 0.380 | 0.000 |
| <b>structure T10</b>                   |       |       |       |       |
| 1                                      | 0.000 | 0.067 | 0.000 | 0.001 |
| 1-y                                    | 0.380 | 0.447 | 0.275 | 0.000 |
| 2-y                                    | 2.414 | 2.441 | 3.744 | 1.651 |
| 4                                      | 4.492 | 4.658 | 3.784 | 3.600 |
| 2                                      | 2.564 | 2.594 | 3.831 | 3.544 |
| 3-y                                    | 2.577 | 2.627 | 3.987 | 3.671 |
| 3                                      | 2.748 | 2.752 | 4.030 | 3.870 |
| 4-y                                    | 4.572 | 4.744 | 4.303 | 3.702 |
| 5-y                                    | 6.996 | 7.071 | 7.582 | 5.565 |
| 5                                      | 7.152 | 7.296 | 7.720 | 7.283 |
| 6-y                                    | 5.204 | 5.140 | 7.926 | 6.011 |
| 6                                      | 5.304 | 5.316 | 7.942 | 7.667 |
| <b>structure T10-ET6,2"</b>            |       |       |       |       |
| 1                                      | 0.000 | 0.000 | 0.000 | 0.000 |
| 1-y                                    | 0.568 | 0.547 | 0.303 | 0.032 |
| <b>structure T10-M5,3"-ET6,2"</b>      |       |       |       |       |
| 1                                      | 0.030 | 0.026 | 0.000 | 0.000 |
| 1-y                                    | 0.000 | 0.000 | 0.569 | 0.089 |
| <b>structure T10-M5,3"-ET6,2",6"</b>   |       |       |       |       |
| 1                                      | 0.000 | 0.000 | 0.000 | 0.000 |
| 1-y                                    | 6.983 | 6.809 | 0.728 | 0.486 |
| <b>structure T10-KT2,6"-M5,5,3",3"</b> |       |       |       |       |
| 1-y                                    | 0.549 | 0.000 | 0.000 | 0.000 |
| 1                                      | 0.000 | 4.410 | 3.800 | 4.632 |
| <b>structure T11-ET6,2"</b>            |       |       |       |       |
| 1                                      | 0.080 | 0.000 | 0.000 | 0.000 |
| 1-y                                    | 0.000 | 0.511 | 0.388 | 0.062 |
| <b>structure T11-M5,3"-ET6,2"</b>      |       |       |       |       |
| 1                                      | 0.000 | 0.000 | 0.000 | 0.000 |

|                                    |        |        |        |        |
|------------------------------------|--------|--------|--------|--------|
| 1-y                                | 0.566  | 0.514  | 0.508  | 0.007  |
| <b>structure T12-KT2-M5,5,3"</b>   |        |        |        |        |
| 1                                  | 0.000  | 0.000  | 0.000  | 0.930  |
| 1-y                                | 0.263  | 0.307  | 0.272  | 0.000  |
| 2                                  | 0.439  | 0.497  | 0.575  | 1.485  |
| 2-y                                | 0.629  | 0.663  | 0.865  | 1.280  |
| 3                                  | 1.994  | 1.987  | 2.851  | 3.699  |
| 4                                  | 2.876  | 2.945  | 4.107  | 5.018  |
| 4-y                                | 2.939  | 3.030  | 4.238  | 4.677  |
| 3-y                                | 3.656  | 3.734  | 4.590  | 0.880  |
| 6-y                                | 11.255 | 11.276 | 11.699 | 10.453 |
| 5                                  | 11.413 | 11.338 | 11.904 | 12.599 |
| 6                                  | 11.475 | 11.402 | 11.926 | 12.812 |
| 5-y                                | 11.250 | 11.135 | 12.232 | 9.894  |
| 7-y                                | 11.947 | 11.739 | 14.154 | 13.262 |
| 9-y                                | 12.940 | 12.882 | 14.872 | 12.956 |
| 8-y                                | 12.816 | 12.569 | 14.876 | 13.248 |
| 9                                  | 13.430 | 13.120 | 15.309 | 16.150 |
| 7                                  | 13.120 | 12.882 | 15.360 | 16.083 |
| 10                                 | 13.534 | 13.265 | 15.439 | 16.155 |
| 10-y                               | 12.856 | 12.731 | 15.507 | 11.633 |
| 8                                  | 13.609 | 13.416 | 15.761 | 16.440 |
| <b>structure T12-KT6"-M5,3",3"</b> |        |        |        |        |
| 1                                  | 0.000  | 0.000  | 0.000  | 0.688  |
| 1-y                                | 0.261  | 0.306  | 0.267  | 0.000  |
| 2                                  | 0.438  | 0.462  | 0.581  | 1.250  |
| 2-y                                | 0.629  | 0.629  | 0.869  | 1.041  |
| 3                                  | 2.003  | 1.961  | 2.865  | 3.469  |
| 3-y                                | 2.279  | 2.181  | 3.260  | 0.155  |
| 4                                  | 2.882  | 2.961  | 4.079  | 4.746  |
| 4-y                                | 2.944  | 2.965  | 4.255  | 4.456  |
| 6-y                                | 11.277 | 11.275 | 11.793 | 10.531 |
| 5                                  | 11.437 | 11.341 | 11.947 | 12.386 |
| 6                                  | 11.497 | 11.404 | 11.971 | 12.612 |
| 5-y                                | 11.591 | 11.626 | 12.262 | 9.136  |
| 7-y                                | 11.970 | 11.787 | 14.205 | 13.062 |
| 8-y                                | 12.842 | 12.523 | 14.916 | 12.548 |
| 9-y                                | 12.971 | 12.903 | 14.928 | 13.042 |
| 9                                  | 13.461 | 13.130 | 15.371 | 15.937 |
| 7                                  | 13.145 | 12.883 | 15.415 | 15.899 |
| 10                                 | 13.569 | 13.279 | 15.549 | 15.966 |
| 8                                  | 13.640 | 13.428 | 15.813 | 16.254 |
| 10-y                               | 13.262 | 13.294 | 15.831 | 12.683 |

| structure T13-ET6,2"       |       |       |       |       |
|----------------------------|-------|-------|-------|-------|
| 1                          | 0.000 | 0.000 | 0.000 | 0.000 |
| 1-y                        | 0.295 | 0.300 | 0.355 | 0.023 |
| structure T13-M5,3"-ET6,2" |       |       |       |       |
| 1                          | 0.000 | 0.000 | 0.000 | 0.203 |
| 1-y                        | 0.200 | 0.180 | 0.281 | 0.000 |
| structure T14-ET6,2"       |       |       |       |       |
| 1                          | 0.000 | 0.000 | 0.000 | 0.000 |
| 1-y                        | 0.502 | 0.482 | 0.614 | 0.513 |
| structure T14-M5,3"-ET6,2" |       |       |       |       |
| 1                          | 0.000 | 0.000 | 0.000 | 0.027 |
| 1-y                        | 0.551 | 0.502 | 0.505 | 0.000 |

**b) The molecules are grouped according to their other substituents**

| conformers   | relative energy (kcal/mol) |       |       |        |
|--------------|----------------------------|-------|-------|--------|
|              | HF                         | HF+   | DFT   | DFT-D3 |
| structure T1 |                            |       |       |        |
| 1            | 0.000                      | 0.000 | 0.000 | 0.000  |
| 1-y          | 0.282                      | 0.285 | 0.325 | 0.093  |
| 2            | 2.477                      | 2.470 | 3.432 | 2.844  |
| 2-y          | 2.580                      | 2.530 | 3.545 | 3.469  |
| 3            | 2.630                      | 2.657 | 3.766 | 3.843  |
| 3-y          | 2.667                      | 2.711 | 3.794 | 3.604  |
| 4            | 5.220                      | 5.358 | 3.858 | 3.843  |
| 4-y          | 5.462                      | 5.591 | 4.166 | 3.868  |
| 5            | 7.686                      | 7.821 | 7.281 | 7.301  |
| 6            | 5.223                      | 5.218 | 7.366 | 7.429  |
| 5-y          | 7.792                      | 7.874 | 7.375 | 6.480  |



|      |        |        |        |        |
|------|--------|--------|--------|--------|
| 7    | 7.688  | 7.793  | 7.424  | 7.447  |
| 7-y  | 7.755  | 7.884  | 7.450  | 7.257  |
| 8    | 8.154  | 8.151  |        |        |
| 8-y  | 8.336  | 8.339  | 7.465  | 7.106  |
| 6-y  | 5.367  | 5.389  | 7.496  | 7.160  |
| 9    | 10.381 | 10.585 | 7.585  | 7.554  |
| 10-y | 8.918  | 8.920  | 7.717  | 7.141  |
| 10   | 8.434  | 8.486  | 7.768  | 7.737  |
| 9-y  | 10.506 | 10.714 | 7.813  | 7.471  |
| 11-y | 8.532  | 8.502  | 10.381 | 10.015 |
| 12-y | 10.926 | 10.961 | 10.598 | 9.566  |
| 12   | 10.962 | 10.859 | 10.685 | 10.669 |
| 13   | 10.690 | 10.712 | 11.006 | 10.959 |
| 13-y | 10.801 | 10.864 | 11.053 | 10.755 |
| 14   | 13.323 | 13.458 | 11.073 | 11.030 |
| 14-y | 13.425 | 13.544 | 11.180 | 10.795 |
| 15-y | 9.342  | 9.356  | 11.278 | 10.884 |
| 16-y | 13.990 | 14.076 | 11.310 | 10.712 |
| 16   | 13.449 | 13.578 | 11.386 | 11.339 |
| 11   | 9.563  | 9.450  | 11.571 | 11.737 |
| 17-y | 9.677  | 9.597  | 11.608 | 11.360 |
| 18-y | 9.879  | 9.597  | 11.869 | 10.961 |
| 17   | 10.079 | 9.871  | 11.946 | 12.121 |
| 15   | 10.143 | 10.097 | 12.100 | 12.258 |
| 19-y | 12.557 | 12.671 | 13.131 | 12.831 |
| 18   | 10.344 | 10.192 | 12.199 | 12.348 |
| 20-y | 13.093 | 13.126 | 13.777 | 13.483 |
| 21-y | 13.317 | 13.438 | 13.946 | 13.608 |
| 22-y | 13.367 | 13.448 | 14.074 | 11.810 |
| 19   | 13.391 | 13.395 | 14.119 | 14.279 |
| 23-y | 15.782 | 15.825 | 14.276 | 12.134 |
| 20   | 13.708 | 13.661 | 14.304 | 14.469 |
| 23   | 16.071 | 16.286 | 14.432 | 14.399 |
| 22   | 14.010 | 14.019 | 14.594 | 14.734 |
| 21   | 13.935 | 13.998 | 14.610 | 14.765 |
| 24-y | 16.354 | 16.419 | 14.757 | 14.425 |
| 24   | 16.734 | 16.827 | 14.827 | 14.867 |
| 25-y | 14.307 | 14.452 | 15.447 | 13.171 |
| 26   | 14.864 | 14.843 | 15.983 | 15.991 |
| 27-y | 15.334 | 15.491 | 16.033 | 15.671 |
| 26-y | 14.965 | 14.960 | 16.049 | 15.701 |
| 25   | 15.285 | 15.304 | 16.507 | 16.633 |
| 28-y | 15.581 | 15.333 | 16.598 | 14.442 |
| 29   | 16.280 | 16.467 | 16.809 | 16.942 |
| 29-y | 15.958 | 16.225 | 16.831 | 16.482 |

|                      |                      |                      |                      |                      |
|----------------------|----------------------|----------------------|----------------------|----------------------|
| 28                   | 15.876               | 15.961               | 17.100               | 17.146               |
| 27                   | 15.756               | 15.880               | 17.246               | 17.363               |
| <b>structure T7</b>  |                      |                      |                      |                      |
| 1                    | 0.000                | 0.000                | 0.000                | 0.000                |
| 1-y                  | 0.280                | 0.285                | 1.007                | 0.331                |
| 2                    | 2.439                | 2.460                | 3.467                | 3.419                |
| 2-y                  | 2.534                | 2.500                | 3.626                | 1.852                |
| 4                    | 4.997                | 5.106                | 3.636                | 3.509                |
| 3                    | 2.600                | 2.621                | 3.837                | 3.834                |
| 3-y                  | 2.636                | 2.671                | 3.863                | 3.584                |
| 4-y                  | 5.235                | 5.337                | 3.946                | 3.516                |
| 5                    | 7.419                | 7.551                | 7.001                | 6.867                |
| 5-y                  | 7.491                | 7.580                | 7.121                | 5.435                |
| 6                    | 5.299                | 5.270                | 7.372                | 7.317                |
| 6-y                  | 5.220                | 5.317                | 7.448                | 6.199                |
| <b>structure T9</b>  |                      |                      |                      |                      |
| 1                    | 0.000                | 0.000                | 0.000                | 0.000                |
| 1-y                  | 0.275                | 0.280                | 0.319                | 0.020                |
| 2                    | 2.509                | 2.516                | 3.452                | 3.401                |
| 4                    | 4.994                | 5.103                | 3.632                | 3.506                |
| 2-y                  | 2.599                | 2.581                | 3.655                | 1.229                |
| 3                    | 2.672                | 2.708                | 3.810                | 3.805                |
| 3-y                  | 2.710                | 2.763                | 3.836                | 3.555                |
| 4-y                  | 5.228                | 5.328                | 3.933                | 3.501                |
| 5                    | 7.487                | 7.605                | 7.067                | 6.888                |
| 5-y                  | 7.553                | 7.631                | 7.252                | 4.307                |
| 6                    | 5.859                | 5.349                | 7.419                | 7.370                |
| 6-y                  | 5.360                | 5.391                | 7.503                | 6.181                |
| <b>structure T10</b> |                      |                      |                      |                      |
| 1                    | 0.000                | 0.067                | 0.000                | 0.001                |
| 1-y                  | 0.380                | 0.447                | 0.275                | 0.000                |
| 2-y                  | 2.414                | 2.441                | 3.744                | 1.651                |
| 4                    | 4.492                | 4.658                | 3.784                | 3.600                |
| 2                    | 2.564                | 2.594                | 3.831                | 3.544                |
| 3-y                  | 2.577                | 2.627                | 3.987                | 3.671                |
| 3                    | 2.748                | 2.752                | 4.030                | 3.870                |
| 4-y                  | 4.572                | 4.744                | 4.303                | 3.702                |
| 5-y                  | 6.996                | 7.071                | 7.582                | 5.565                |
| 5                    | 7.152                | 7.296                | 7.720                | 7.283                |
| 6-y                  | 5.204                | 5.140                | 7.926                | 6.011                |
| 6                    | 5.304                | 5.316                | 7.942                | 7.667                |
| //////////////////// | //////////////////// | //////////////////// | //////////////////// | //////////////////// |

|                                  |                  |                  |                  |                  |
|----------------------------------|------------------|------------------|------------------|------------------|
| <b>structure T9-M5,3"</b>        |                  |                  |                  |                  |
| 1                                | 0.000            | 0.000            | 0.000            | 0.134            |
| 1-y                              | 0.225            | 0.216            | 0.266            | 0.000            |
| 2                                | 1.998            | 2.028            | 2.866            | 2.936            |
| 2-y                              | 2.073            | 2.029            | 3.067            | 0.657            |
| 3                                | 2.247            | 2.251            | 3.323            | 3.437            |
| 3-y                              | 2.269            | 2.309            | 3.356            | 3.084            |
| 4                                | 4.626            | 4.738            | 3.654            | 3.687            |
| 4-y                              | 4.837            | 4.935            | 3.934            | 3.564            |
| 6                                | 4.282            | 4.292            | 6.240            | 6.287            |
| 6-y                              | 4.323            | 4.365            | 6.358            | 4.689            |
| 5                                | 6.598            | 6.707            | 6.479            | 6.446            |
| 5-y                              | 6.656            | 6.658            | 6.687            | 3.754            |
| ////////////////                 | //////////////// | //////////////// | //////////////// | //////////////// |
| <b>structure T3-ET6,2"</b>       |                  |                  |                  |                  |
| 1                                | 0.158            | 0.000            | 0.000            | 0.154            |
| 1-y                              | 0.000            | 0.200            | 0.485            | 0.000            |
| <b>structure T7-ET6,2"</b>       |                  |                  |                  |                  |
| 1                                | 0.000            | 0.000            | 0.000            | 0.000            |
| 1-y                              | 0.296            | 0.307            | 0.347            | 0.046            |
| <b>structure T9-ET6,2"</b>       |                  |                  |                  |                  |
| 1                                | 0.000            | 0.000            | 0.000            | 0.000            |
| 1-y                              | 0.293            | 0.299            | 0.346            | 0.025            |
| <b>structure T10-ET6,2"</b>      |                  |                  |                  |                  |
| 1                                | 0.000            | 0.000            | 0.000            | 0.000            |
| 1-y                              | 0.568            | 0.547            | 0.303            | 0.032            |
| <b>structure T11-ET6,2"</b>      |                  |                  |                  |                  |
| 1                                | 0.080            | 0.000            | 0.000            | 0.000            |
| 1-y                              | 0.000            | 0.511            | 0.388            | 0.062            |
| <b>structure T13-ET6,2"</b>      |                  |                  |                  |                  |
| 1                                | 0.000            | 0.000            | 0.000            | 0.000            |
| 1-y                              | 0.295            | 0.300            | 0.355            | 0.023            |
| <b>structure T14-ET6,2"</b>      |                  |                  |                  |                  |
| 1                                | 0.000            | 0.000            | 0.000            | 0.000            |
| 1-y                              | 0.502            | 0.482            | 0.614            | 0.513            |
| ////////////////                 | //////////////// | //////////////// | //////////////// | //////////////// |
| <b>structure T3-M5,3"-ET6,2"</b> |                  |                  |                  |                  |

|                                      |                  |                  |                  |                  |
|--------------------------------------|------------------|------------------|------------------|------------------|
| 1                                    | 0.030            | 0.015            | 0.000            | 0.329            |
| 1-y                                  | 0.000            | 0.000            | 0.028            | 0.000            |
| <b>structure T7-M5,3"-ET6,2"</b>     |                  |                  |                  |                  |
| 1                                    | 0.000            | 0.000            | 0.000            | 0.188            |
| 1-y                                  | 0.201            | 0.181            | 0.279            | 0.000            |
| <b>structure T9-M5,3"-ET6,2"</b>     |                  |                  |                  |                  |
| 1                                    | 0.000            | 0.000            | 0.000            | 0.195            |
| 1-y                                  | 0.199            | 0.176            | 0.279            | 0.000            |
| <b>structure T10-M5,3"-ET6,2"</b>    |                  |                  |                  |                  |
| 1                                    | 0.030            | 0.026            | 0.000            | 0.000            |
| 1-y                                  | 0.000            | 0.000            | 0.569            | 0.089            |
| <b>structure T11-M5,3"-ET6,2"</b>    |                  |                  |                  |                  |
| 1                                    | 0.000            | 0.000            | 0.000            | 0.000            |
| 1-y                                  | 0.566            | 0.514            | 0.508            | 0.007            |
| <b>structure T13-M5,3"-ET6,2"</b>    |                  |                  |                  |                  |
| 1                                    | 0.000            | 0.000            | 0.000            | 0.203            |
| 1-y                                  | 0.200            | 0.180            | 0.281            | 0.000            |
| <b>structure T14-M5,3"-ET6,2"</b>    |                  |                  |                  |                  |
| 1                                    | 0.000            | 0.000            | 0.000            | 0.027            |
| 1-y                                  | 0.551            | 0.502            | 0.505            | 0.000            |
| <b>structure T10-M5,3"-ET6,2",6"</b> |                  |                  |                  |                  |
| 1                                    | 0.000            | 0.000            | 0.000            | 0.000            |
| 1-y                                  | 6.983            | 6.809            | 0.728            | 0.486            |
| ////////////////                     | //////////////// | //////////////// | //////////////// | //////////////// |
| <b>structure T6-M5,3"-ET6,4"</b>     |                  |                  |                  |                  |
| 3                                    | 0.000            | 0.000            | 0.000            | 0.195            |
| 3-y-out-out                          | 0.209            | 0.195            | 0.141            | 0.000            |
| 3-y-in-out                           | 0.220            | 0.184            | 0.190            | 0.030            |
| 3-y-in-in                            | 3.310            | 4.231            | 4.737            | 2.823            |
| ////////////////                     | //////////////// | //////////////// | //////////////// | //////////////// |
| <b>structure T7-KT6"-M5,3",3"</b>    |                  |                  |                  |                  |
| 1                                    | 0.000            | 0.000            | 0.000            | 0.219            |
| 1-y                                  | 0.260            | 0.306            | 0.287            | 0.000            |
| 2                                    | 0.433            | 0.498            | 0.610            | 0.816            |
| 2-y                                  | 0.623            | 0.664            | 0.898            | 0.612            |
| 3                                    | 2.003            | 2.007            | 2.911            | 3.077            |
| 3-y                                  | 2.276            | 2.282            | 3.226            | 1.275            |

|      |        |        |        |        |
|------|--------|--------|--------|--------|
| 4    | 2.884  | 2.968  | 4.168  | 4.373  |
| 4-y  | 2.950  | 3.054  | 4.311  | 4.088  |
| 5    | 10.137 | 10.104 | 10.196 | 10.216 |
| 5-y  | 9.896  | 9.828  | 10.249 | 8.521  |
| 6    | 10.570 | 10.582 | 10.510 | 9.925  |
| 6-y  | 10.662 | 10.644 | 10.602 | 10.698 |
| 7-y  | 12.073 | 11.902 | 14.387 | 12.814 |
| 7    | 13.251 | 13.016 | 15.573 | 15.611 |
| 8-y  | 12.948 | 12.698 | 15.114 | 12.780 |
| 9-y  | 13.161 | 13.044 | 15.141 | 13.766 |
| 10-y | 13.341 | 13.085 | 15.474 | 13.043 |
| 9    | 13.594 | 13.282 | 15.595 | 15.707 |
| 10   | 13.698 | 13.426 | 15.732 | 15.777 |
| 8    | 13.743 | 13.556 | 15.982 | 15.980 |

**structure T8-KT6"-M5,3",3"**

|      |        |        |        |        |
|------|--------|--------|--------|--------|
| 1    | 0.000  | 0.000  | 0.000  | 0.324  |
| 1-y  | 0.268  | 0.307  | 0.249  | 0.000  |
| 2    | 0.436  | 0.502  | 0.574  | 0.882  |
| 2-y  | 0.627  | 0.668  | 0.860  | 0.694  |
| 3    | 1.998  | 1.996  | 2.856  | 3.118  |
| 3-y  | 2.281  | 2.267  | 3.242  | 0.981  |
| 4    | 2.878  | 2.956  | 4.108  | 4.418  |
| 4-y  | 2.941  | 3.039  | 4.252  | 4.127  |
| 5    | 10.092 | 9.962  | 10.086 | 10.186 |
| 5-y  | 9.844  | 9.765  | 10.179 | 7.885  |
| 6-y  | 10.423 | 10.375 | 10.400 | 9.517  |
| 6    | 10.644 | 10.548 | 10.508 | 10.705 |
| 7-y  | 11.986 | 11.836 | 14.203 | 12.742 |
| 9-y  | 13.288 | 12.964 | 14.931 | 13.121 |
| 8-y  | 12.858 | 12.584 | 14.931 | 12.718 |
| 10-y | 13.132 | 12.922 | 15.319 | 11.967 |
| 9    | 13.479 | 13.183 | 15.386 | 15.595 |
| 7    | 13.163 | 12.939 | 15.428 | 15.518 |
| 10   | 13.585 | 13.296 | 15.552 | 15.657 |
| 8    | 13.653 | 13.438 | 15.791 | 15.885 |

**structure T9-KT6"-M5,3",3"**

|     |       |       |       |       |
|-----|-------|-------|-------|-------|
| 1   | 0.000 | 0.000 | 0.000 | 0.672 |
| 1-y | 0.261 | 0.352 | 0.266 | 0.000 |
| 2   | 0.439 | 0.545 | 0.544 | 1.196 |
| 2-y | 0.630 | 0.711 | 0.868 | 1.040 |
| 3   | 1.996 | 2.035 | 2.853 | 3.452 |
| 4   | 2.878 | 2.995 | 4.070 | 4.725 |
| 4-y | 2.941 | 3.037 | 4.210 | 4.431 |

|                                    |        |        |        |        |
|------------------------------------|--------|--------|--------|--------|
| 3-y                                | 2.756  | 2.854  | 4.268  | 1.817  |
| 6-y                                | 11.266 | 11.341 | 11.730 | 10.476 |
| 5                                  | 11.424 | 11.406 | 11.914 | 12.378 |
| 6                                  | 11.485 | 11.467 | 11.948 | 12.575 |
| 5-y                                | 11.265 | 11.238 | 12.251 | 9.837  |
| 7-y                                | 11.961 | 11.806 | 14.162 | 13.040 |
| 9-y                                | 12.961 | 12.968 | 14.865 | 13.019 |
| 8-y                                | 12.831 | 12.594 | 14.899 | 12.981 |
| 9                                  | 13.451 | 13.194 | 15.349 | 15.900 |
| 7                                  | 13.136 | 12.950 | 15.391 | 15.858 |
| 10                                 | 13.555 | 13.338 | 15.465 | 15.931 |
| 8                                  | 13.645 | 13.484 | 15.794 | 16.220 |
| 10-y                               | 12.933 | 12.893 | 15.949 | 13.576 |
| <b>structure T12-KT6"-M5,3",3"</b> |        |        |        |        |
| 1                                  | 0.000  | 0.000  | 0.000  | 0.688  |
| 1-y                                | 0.261  | 0.306  | 0.267  | 0.000  |
| 2                                  | 0.438  | 0.462  | 0.581  | 1.250  |
| 2-y                                | 0.629  | 0.629  | 0.869  | 1.041  |
| 3                                  | 2.003  | 1.961  | 2.865  | 3.469  |
| 3-y                                | 2.279  | 2.181  | 3.260  | 0.155  |
| 4                                  | 2.882  | 2.961  | 4.079  | 4.746  |
| 4-y                                | 2.944  | 2.965  | 4.255  | 4.456  |
| 6-y                                | 11.277 | 11.275 | 11.793 | 10.531 |
| 5                                  | 11.437 | 11.341 | 11.947 | 12.386 |
| 6                                  | 11.497 | 11.404 | 11.971 | 12.612 |
| 5-y                                | 11.591 | 11.626 | 12.262 | 9.136  |
| 7-y                                | 11.970 | 11.787 | 14.205 | 13.062 |
| 8-y                                | 12.842 | 12.523 | 14.916 | 12.548 |
| 9-y                                | 12.971 | 12.903 | 14.928 | 13.042 |
| 9                                  | 13.461 | 13.130 | 15.371 | 15.937 |
| 7                                  | 13.145 | 12.883 | 15.415 | 15.899 |
| 10                                 | 13.569 | 13.279 | 15.549 | 15.966 |
| 8                                  | 13.640 | 13.428 | 15.813 | 16.254 |
| 10-y                               | 13.262 | 13.294 | 15.831 | 12.683 |
| <b>structure T8-KT2-M5,5,3"</b>    |        |        |        |        |
| 1                                  | 0.000  | 0.000  | 0.000  | 0.670  |
| 1-y                                | 0.262  | 0.305  | 0.274  | 0.000  |
| 2                                  | 0.440  | 0.460  | 0.538  | 1.232  |
| 2-y                                | 0.630  | 0.665  | 0.834  | 1.049  |
| 3-y                                | 3.807  | 3.784  | 3.060  | 1.272  |
| 4                                  | 2.188  | 2.155  | 4.039  | 4.727  |
| 3                                  | 3.571  | 3.584  | 4.041  | 3.568  |
| 4-y                                | 2.923  | 2.932  | 4.135  | 4.427  |

|                                       |                  |                  |                  |                  |
|---------------------------------------|------------------|------------------|------------------|------------------|
| 5                                     | 10.090           | 9.981            | 10.056           | 10.571           |
| 5-y                                   | 10.291           | 9.742            | 10.165           | 8.747            |
| 6-y                                   | 10.372           | 10.321           | 10.399           | 9.376            |
| 6                                     | 10.635           | 10.442           | 10.460           | 11.078           |
| 7-y                                   | 11.970           | 11.731           | 14.173           | 13.017           |
| 9-y                                   | 13.031           | 12.867           | 14.803           | 13.004           |
| 8-y                                   | 12.841           | 12.564           | 14.875           | 13.816           |
| 9                                     | 13.453           | 13.075           | 15.279           | 15.894           |
| 7                                     | 13.130           | 12.824           | 15.317           | 15.848           |
| 8                                     | 13.667           | 13.462           | 15.770           | 16.282           |
| 10-y                                  | 14.872           | 14.603           | 16.453           | 12.839           |
| 10                                    | 15.169           | 14.859           | 16.749           | 16.064           |
| <b>structure T12-KT2-M5,5,3"</b>      |                  |                  |                  |                  |
| 1                                     | 0.000            | 0.000            | 0.000            | 0.930            |
| 1-y                                   | 0.263            | 0.307            | 0.272            | 0.000            |
| 2                                     | 0.439            | 0.497            | 0.575            | 1.485            |
| 2-y                                   | 0.629            | 0.663            | 0.865            | 1.280            |
| 3                                     | 1.994            | 1.987            | 2.851            | 3.699            |
| 4                                     | 2.876            | 2.945            | 4.107            | 5.018            |
| 4-y                                   | 2.939            | 3.030            | 4.238            | 4.677            |
| 3-y                                   | 3.656            | 3.734            | 4.590            | 0.880            |
| 6-y                                   | 11.255           | 11.276           | 11.699           | 10.453           |
| 5                                     | 11.413           | 11.338           | 11.904           | 12.599           |
| 6                                     | 11.475           | 11.402           | 11.926           | 12.812           |
| 5-y                                   | 11.250           | 11.135           | 12.232           | 9.894            |
| 7-y                                   | 11.947           | 11.739           | 14.154           | 13.262           |
| 9-y                                   | 12.940           | 12.882           | 14.872           | 12.956           |
| 8-y                                   | 12.816           | 12.569           | 14.876           | 13.248           |
| 9                                     | 13.430           | 13.120           | 15.309           | 16.150           |
| 7                                     | 13.120           | 12.882           | 15.360           | 16.083           |
| 10                                    | 13.534           | 13.265           | 15.439           | 16.155           |
| 10-y                                  | 12.856           | 12.731           | 15.507           | 11.633           |
| 8                                     | 13.609           | 13.416           | 15.761           | 16.440           |
| ////////////////                      | //////////////// | //////////////// | //////////////// | //////////////// |
| <b>structure T2-KT2,6"-M5,5,3",3"</b> |                  |                  |                  |                  |
| 1                                     | 0.000            | 0.000            | 0.000            | 0.172            |
| 1-y                                   | 0.391            | 0.392            | 0.385            | 0.000            |
| <b>structure T4-KT2,6"-M5,5,3",3"</b> |                  |                  |                  |                  |
| 1                                     | 0.000            | 0.000            | 0.000            | 0.177            |
| 1-y                                   | 0.389            | 0.389            | 0.383            | 0.000            |
| <b>structure T5-KT2,6"-M5,5,3",3"</b> |                  |                  |                  |                  |

|                                        |                  |                  |                  |                  |
|----------------------------------------|------------------|------------------|------------------|------------------|
| 1                                      | 0.000            | 0.000            | 0.000            | 0.330            |
| 1-y                                    | 0.387            | 0.384            | 0.370            | 0.000            |
| <b>structure T7-KT2,6"-M5,5,3",3"</b>  |                  |                  |                  |                  |
| 1                                      | 0.000            | 0.000            | 0.000            | 0.140            |
| 1-y                                    | 0.390            | 0.391            | 0.384            | 0.000            |
| <b>structure T8-KT2,6"-M5,5,3",3"</b>  |                  |                  |                  |                  |
| 1                                      | 0.000            | 0.000            | 0.000            | 0.336            |
| 1-y                                    | 0.387            | 0.422            | 0.373            | 0.000            |
| <b>structure T9-KT2,6"-M5,5,3",3"</b>  |                  |                  |                  |                  |
| 1                                      | 0.000            | 0.000            | 0.000            | 0.962            |
| 1-y                                    | 0.383            | 0.387            | 0.380            | 0.000            |
| <b>structure T10-KT2,6"-M5,5,3",3"</b> |                  |                  |                  |                  |
| 1-y                                    | 0.549            | 0.000            | 0.000            | 0.000            |
| 1                                      | 0.000            | 4.410            | 3.800            | 4.632            |
| ////////////////                       | //////////////// | //////////////// | //////////////// | //////////////// |
| <b>structure T5-KT6"-M3",3"-ET2"</b>   |                  |                  |                  |                  |
| 1                                      | 0.000            | 0.004            | 0.000            | 0.454            |
| 1-y                                    | 0.017            | 0.000            | 0.086            | 0.000            |
| <b>structure T9-KT6"-M3",3"-ET2"</b>   |                  |                  |                  |                  |
| 1                                      | 0.000            | 0.004            | 0.000            | 0.457            |
| 1-y                                    | 0.017            | 0.000            | 0.085            | 0.000            |
| <b>structure T9-KT6"-M5,3",3"-ET2"</b> |                  |                  |                  |                  |
| 1                                      | 0.000            | 0.000            | 0.000            | 0.000            |
| 1-y                                    | 0.182            | 0.157            | 0.530            | 0.043            |



**Table S 5****Energy difference between corresponding conformers with outstretched and half-bowl-shaped geometries, in the calculated trimeric acylphloroglucinols**

The table reports the differences in the HF/6-31G(d,p), HF/6-31+G(d,p), DFT/B3LYP/6-31+G(d,p), and DFT/B3LYP/6-31+G(d,p) with the Grimme' corrections results, respectively denoted as HF, HF+, DFT and DFT-D3 in the column headings. The differences are taken as «energy of the conformer with bowl-shaped geometry minus energy of the conformer with outstretched geometry ». To facilitate comparisons of different bowl-shaped geometry-types, the values for conformers with up—down—up orientations of the monomers are highlighted in yellow and the values for conformers with up—up—up orientations of the monomers are highlighted in blue (the values for up—down—down conformers are not highlighted).

| molecule | conformer | energy difference between half-bowl-shaped and outstretched-shaped conformers (kcal/mol) |        |        |        |
|----------|-----------|------------------------------------------------------------------------------------------|--------|--------|--------|
|          |           | HF                                                                                       | HF+    | DFT    | DFT-D3 |
| T1       | 1         | 0.282                                                                                    | 0.285  | 0.325  | 0.093  |
|          | 2         | 0.103                                                                                    | 0.060  | 0.113  | 0.625  |
|          | 3         | 0.037                                                                                    | 0.054  | 0.028  | -0.239 |
|          | 4         | 0.242                                                                                    | 0.233  | 0.308  | 0.025  |
|          | 5         | 0.106                                                                                    | 0.053  | 0.094  | -0.821 |
|          | 6         | 0.144                                                                                    | 0.171  | 0.130  | -0.269 |
|          | 7         | 0.067                                                                                    | 0.091  | 0.026  | -0.190 |
|          | 8         | 0.182                                                                                    | 0.188  |        |        |
|          | 9         | 0.125                                                                                    | 0.129  | 0.228  | -0.083 |
|          | 10        | 0.484                                                                                    | 0.434  | -0.051 | -0.596 |
|          | 11        | -1.031                                                                                   | -0.948 | -1.190 | -1.722 |
|          | 12        | -0.036                                                                                   | 0.102  | -0.087 | -1.103 |
|          | 13        | 0.111                                                                                    | 0.152  | 0.047  | -0.204 |
|          | 14        | 0.102                                                                                    | 0.086  | 0.107  | -0.235 |
|          | 15        | -0.801                                                                                   | -0.741 | -0.822 | -1.374 |
|          | 16        | 0.541                                                                                    | 0.498  | -0.076 | -0.627 |
|          | 17        | -0.402                                                                                   | -0.274 | -0.338 | -0.761 |
|          | 18        | -0.465                                                                                   | -0.595 | -0.330 | -1.387 |
|          | 19        | -0.834                                                                                   | -0.724 | -0.988 | -1.448 |
|          | 20        | -0.615                                                                                   | -0.535 | -0.527 | -0.986 |
|          | 21        | -0.618                                                                                   | -0.560 | -0.664 | -1.157 |
|          | 22        | -0.643                                                                                   | -0.571 | -0.520 | -2.924 |
|          | 23        | -0.289                                                                                   | -0.461 | -0.156 | -2.265 |
|          | 24        | -0.380                                                                                   | -0.408 | -0.070 | -0.442 |
|          | 25        | -0.978                                                                                   | -0.852 | -1.060 | -3.462 |
|          | 26        | 0.101                                                                                    | 0.117  | 0.066  | -0.290 |
|          | 27        | -0.422                                                                                   | -0.389 | -1.213 | -1.692 |
|          | 28        | -0.295                                                                                   | -0.628 | -0.502 | -2.704 |

|                      |            |        |        |        |        |
|----------------------|------------|--------|--------|--------|--------|
|                      | 29         | -0.322 | -0.242 | 0.022  | -0.460 |
|                      |            |        |        |        |        |
| T2-KT2,6"-M5,5,3",3" | 1          | 0.391  | 0.392  | 0.385  | -0.172 |
|                      |            |        |        |        |        |
| T3-ET6,2"            | 1          | -0.158 | 0.200  | 0.485  | -0.154 |
|                      |            |        |        |        |        |
| T3-M5,3"-ET6,2"      | 1          | -0.030 | -0.015 | 0.028  | -0.329 |
|                      |            |        |        |        |        |
| T4-KT2,6"-M5,5,3",3" | 1          | 0.389  | 0.389  | 0.383  | -0.177 |
|                      |            |        |        |        |        |
| T5-KT6"-M3",3"-ET4   | 1          | 0.387  | 0.384  | 0.370  | -0.330 |
|                      |            |        |        |        |        |
| T5-KT2,6"-M5,5,3",3" | 1          | 0.017  | -0.004 | 0.086  | -0.454 |
|                      |            |        |        |        |        |
| T6-M5,3"-ET6,4"      | 1          | 0.209  | 0.195  | 0.141  | -0.195 |
|                      | 1-y-in-out | 0.220  | 0.184  | 0.190  | 0.165  |
|                      | 1-y-in-in  | 3.310  | 4.231  | 4.737  | 2.628  |
|                      |            |        |        |        |        |
| T7                   | 1          | 0.280  | 0.285  | 1.007  | 0.331  |
|                      | 2          | 0.095  | 0.040  | 0.159  | -1.567 |
|                      | 3          | 0.036  | 0.050  | 0.026  | -0.250 |
|                      | 4          | 0.238  | 0.231  | 0.310  | 0.007  |
|                      | 5          | 0.072  | 0.029  | 0.120  | -1.432 |
|                      | 6          | -0.079 | 0.047  | 0.076  | -1.118 |
|                      |            |        |        |        |        |
| T7-ET6,2"            | 1          | 0.296  | 0.307  | 0.347  | 0.046  |
|                      |            |        |        |        |        |
| T7-M5,3"-ET6,2"      | 1          | 0.201  | 0.181  | 0.279  | -0.188 |
|                      |            |        |        |        |        |
| T7-KT6"-M5,3",3"     | 1          | 0.260  | 0.306  | 0.287  | -0.219 |
|                      | 2          | 0.190  | 0.166  | 0.288  | -0.204 |
|                      | 3          | 0.273  | 0.275  | 0.315  | -3.077 |
|                      | 4          | 0.066  | 0.086  | 0.143  | -0.285 |
|                      | 5          | -0.241 | -0.276 | 0.053  | -1.695 |
|                      | 6          | 0.092  | 0.062  | 0.092  | 0.773  |
|                      | 7          | -1.178 | -1.114 | -1.186 | -2.797 |
|                      | 8          | -0.795 | -0.858 | -0.868 | -3.200 |
|                      | 9          | -0.433 | -0.238 | -0.454 | -1.941 |
|                      | 10         | -0.357 | -0.341 | -0.258 | -2.734 |
|                      |            |        |        |        |        |
| T7-KT2,6"-M5,5,3",3" | 1          | 0.390  | 0.391  | 0.384  | -0.140 |
|                      |            |        |        |        |        |
| T8-KT6"-M5,3",3"     | 1          | 0.268  | 0.307  | 0.249  | -0.324 |
|                      | 2          | 0.191  | 0.166  | 0.286  | -0.188 |

|                      |            |        |        |        |        |
|----------------------|------------|--------|--------|--------|--------|
|                      | 3          | 0.283  | 0.271  | 0.386  | -2.137 |
|                      | 4          | 0.063  | 0.083  | 0.144  | -0.291 |
|                      | 5          | -0.248 | -0.197 | 0.093  | -2.301 |
|                      | 6          | -0.221 | -0.173 | -0.108 | -1.188 |
|                      | 7          | -1.177 | -1.103 | -1.225 | -2.776 |
|                      | 8          | -0.795 | -0.854 | -0.860 | -3.167 |
|                      | 9          | -0.191 | -0.219 | -0.455 | -2.474 |
|                      | 10         | -0.453 | -0.374 | -0.233 | -3.690 |
|                      |            |        |        |        |        |
| T8-KT2-M5,5,3"       | 1          | 0.262  | 0.305  | 0.274  | -0.670 |
|                      | 2          | 0.190  | 0.205  | 0.296  | -0.183 |
|                      | 3          | 0.236  | 0.200  | -0.981 | -2.296 |
|                      | 4          | 0.735  | 0.777  | 0.096  | -0.300 |
|                      | 5          | 0.201  | -0.239 | 0.109  | -1.824 |
|                      | 6          | -0.263 | -0.121 | -0.061 | -1.702 |
|                      | 7          | -1.160 | -1.093 | -1.144 | -2.831 |
|                      | 8          | -0.826 | -0.898 | -0.895 | -2.466 |
|                      | 9          | -0.422 | -0.208 | -0.476 | -2.890 |
|                      | 10         | -0.297 | -0.256 | -0.296 | -3.225 |
|                      |            |        |        |        |        |
| T8-KT2,6"-M5,5,3",3" | 1          | 0.387  | 0.422  | 0.373  | -0.336 |
|                      |            |        |        |        |        |
| T9                   | 1          | 0.275  | 0.280  | 0.319  | 0.020  |
|                      | 2          | 0.090  | 0.065  | 0.203  | -2.172 |
|                      | 3          | 0.038  | 0.055  | 0.026  | -0.250 |
|                      | 4          | 0.234  | 0.225  | 0.301  | -0.005 |
|                      | 5          | 0.066  | 0.026  | 0.185  | -2.581 |
|                      | 6          | -0.499 | 0.042  | 0.084  | -1.189 |
|                      |            |        |        |        |        |
| T9-M5,3"             | 1          | 0.225  | 0.216  | 0.266  | -0.134 |
|                      | 2          | 0.075  | 0.001  | 0.201  | -2.279 |
|                      | 3          | 0.022  | 0.058  | 0.033  | -0.353 |
|                      | 4          | 0.211  | 0.197  | 0.280  | -0.123 |
|                      | 5          | 0.058  | -0.049 | 0.208  | -2.692 |
|                      | 6          | 0.041  | 0.073  | 0.118  | -1.598 |
|                      |            |        |        |        |        |
| T9-ET6,2"            | 1          | 0.293  | 0.299  | 0.346  | 0.025  |
|                      |            |        |        |        |        |
| T9-M5,3"-ET6,2"      | 1          | 0.199  | 0.176  | 0.279  | -0.195 |
|                      |            |        |        |        |        |
| T9-M5,3"-ET6,4"      | 1          | 0.210  | 0.195  | 0.186  | -0.150 |
|                      | 1-y-in-out | 0.218  | 0.183  |        | -0.180 |
|                      | 1-y-in-in  | 3.294  | 4.216  | 4.738  | 2.798  |
|                      |            |        |        |        |        |

|                       |    |        |        |        |        |
|-----------------------|----|--------|--------|--------|--------|
| T9-KT6"-M5,3",3"      | 1  | 0.261  | 0.352  | 0.266  | -0.672 |
|                       | 2  | 0.191  | 0.166  | 0.324  | -0.156 |
|                       | 3  | 0.760  | 0.819  | 1.415  | -1.635 |
|                       | 4  | 0.063  | 0.042  | 0.140  | -0.294 |
|                       | 5  | -0.159 | -0.168 | 0.337  | -2.541 |
|                       | 6  | -0.219 | -0.126 | -0.218 | -2.099 |
|                       | 7  | -1.175 | -1.144 | -1.229 | -2.818 |
|                       | 8  | -0.814 | -0.890 | -0.895 | -3.239 |
|                       | 9  | -0.490 | -0.226 | -0.484 | -2.881 |
|                       | 10 | -0.622 | -0.445 | 0.484  | -2.355 |
|                       |    |        |        |        |        |
| T9-KT6"-M3",3"-ET2"   | 1  | -0.017 | -0.004 | 0.085  | -0.457 |
|                       |    |        |        |        |        |
| T9-KT6"-M5,3",3"-ET2" | 1  | 0.182  | 0.157  | 0.530  | 0.043  |
|                       |    |        |        |        |        |
| T9-KT2,6"-M5,5,3",3"  | 1  | 0.383  | 0.387  | 0.380  | -0.962 |
|                       |    |        |        |        |        |
| T10                   | 1  | 0.380  | 0.380  | 0.275  | -0.001 |
|                       | 2  | -0.150 | -0.153 | -0.087 | -1.893 |
|                       | 3  | -0.171 | -0.125 | -0.043 | -0.199 |
|                       | 4  | 0.080  | 0.086  | 0.519  | 0.102  |
|                       | 5  | -0.156 | -0.225 | -0.138 | -1.718 |
|                       | 6  | -0.100 | -0.176 | -0.016 | -1.656 |
|                       |    |        |        |        |        |
| T10-ET6,2"            | 1  | 0.568  | 0.547  | 0.303  | 0.032  |
|                       |    |        |        |        |        |
| T10-M5,3"-ET6,2"      | 1  | -0.030 | -0.026 | 0.569  | 0.089  |
|                       |    |        |        |        |        |
| T10-M5,3"-ET6,2",6"   | 1  | 6.983  | 6.809  | 0.728  | 0.486  |
|                       |    |        |        |        |        |
| T10-KT2,6"-M5,5,3",3" | 1  | -0.549 | 4.410  | 3.800  | 4.632  |
|                       |    |        |        |        |        |
| T11-ET6,2"            | 1  | -0.080 | 0.511  | 0.388  | 0.062  |
|                       |    |        |        |        |        |
| T11-M5,3"-ET6,2"      | 1  | 0.566  | 0.514  | 0.508  | 0.007  |
|                       |    |        |        |        |        |
| T12-KT2-M5,5,3"       | 1  | 0.263  | 0.307  | 0.272  | -0.930 |
|                       | 2  | 0.190  | 0.166  | 0.290  | -0.205 |
|                       | 3  | 1.662  | 1.747  | 1.739  | -2.819 |
|                       | 4  | 0.063  | 0.085  | 0.131  | -0.341 |
|                       | 5  | -0.163 | -0.203 | 0.328  | -2.705 |
|                       | 6  | -0.220 | -0.126 | -0.227 | -2.359 |
|                       | 7  | -1.173 | -1.143 | -1.206 | -2.821 |
|                       | 8  | -0.793 | -0.847 | -0.885 | -3.192 |

|                   |    |        |        |        |        |
|-------------------|----|--------|--------|--------|--------|
|                   | 9  | -0.490 | -0.238 | -0.437 | -3.194 |
|                   | 10 | -0.678 | -0.534 | 0.068  | -4.522 |
|                   |    |        |        |        |        |
| T12-KT6"-M5,3",3" | 1  | 0.261  | 0.306  | 0.267  | -0.688 |
|                   | 2  | 0.191  | 0.167  | 0.288  | -0.209 |
|                   | 3  | 0.276  | 0.220  | 0.395  | -3.314 |
|                   | 4  | 0.062  | 0.004  | 0.176  | -0.290 |
|                   | 5  | 0.154  | 0.285  | 0.315  | -3.250 |
|                   | 6  | -0.220 | -0.129 | -0.178 | -2.081 |
|                   | 7  | -1.175 | -1.096 | -1.210 | -2.837 |
|                   | 8  | -0.798 | -0.905 | -0.897 | -3.706 |
|                   | 9  | -0.490 | -0.227 | -0.443 | -2.895 |
|                   | 10 | -0.307 | 0.015  | 0.282  | -3.283 |
|                   |    |        |        |        |        |
| T13-ET6,2"        | 1  | 0.295  | 0.300  | 0.355  | 0.023  |
|                   |    |        |        |        |        |
| T13-M5,3"-ET6,2"  | 1  | 0.200  | 0.180  | 0.281  | -0.203 |
|                   |    |        |        |        |        |
| T14-ET6,2"        | 1  | 0.502  | 0.482  | 0.614  | 0.513  |
|                   |    |        |        |        |        |
| T14-M5,3"-ET6,2"  | 1  | 0.551  | 0.502  | 0.505  | -0.027 |

**Table S 6****Lowering effect of Grimme's correction on the estimation of the energy of the conformers of the calculated trimeric acylphloroglucinols**

The table reports the difference in the estimations of the conformers' energies, taken as «energy in the DFT/B3LYP/6-31+G(d,p) result without Grimme's correction minus energy in the DFT/B3LYP/6-31+G(d,p) result comprising Grimme's correction».

| molecule                | conformer | energy difference (kcal/mol) | conformer | energy difference (kcal/mol) |
|-------------------------|-----------|------------------------------|-----------|------------------------------|
| T1                      | 1         | 48.051                       | 1-y       | 48.283                       |
|                         | 2         | 48.014                       | 2-y       | 48.752                       |
|                         | 3         | 47.975                       | 3-y       | 48.241                       |
|                         | 4         | 48.066                       | 4-y       | 48.349                       |
|                         | 5         | 48.031                       | 5-y       | 48.947                       |
|                         | 6         | 47.988                       | 6-y       | 48.387                       |
|                         | 7         | 48.028                       | 7-y       | 48.244                       |
|                         | 8         |                              | 8-y       | 48.410                       |
|                         | 9         | 48.083                       | 9-y       | 48.393                       |
|                         | 10        | 48.083                       | 10-y      | 48.627                       |
|                         | 11        | 47.886                       | 11-y      | 48.417                       |
|                         | 12        | 48.068                       | 12-y      | 49.083                       |
|                         | 13        | 48.098                       | 13-y      | 48.349                       |
|                         | 14        | 48.094                       | 14-y      | 48.436                       |
|                         | 15        | 47.894                       | 15-y      | 48.446                       |
|                         | 16        | 48.098                       | 16-y      | 48.649                       |
|                         | 17        | 47.876                       | 17-y      | 48.299                       |
|                         | 18        | 47.902                       | 18-y      | 48.960                       |
|                         | 19        | 47.891                       | 19-y      | 48.352                       |
|                         | 20        | 47.886                       | 20-y      | 48.346                       |
|                         | 21        | 47.897                       | 21-y      | 48.389                       |
|                         | 22        | 47.911                       | 22-y      | 50.316                       |
|                         | 23        | 48.085                       | 23-y      | 50.193                       |
|                         | 24        | 48.011                       | 24-y      | 48.383                       |
|                         | 25        | 47.925                       | 25-y      | 50.327                       |
|                         | 26        | 48.043                       | 26-y      | 48.400                       |
|                         | 27        | 47.934                       | 27-y      | 48.413                       |
|                         | 28        | 48.005                       | 28-y      | 50.207                       |
|                         | 29        | 47.918                       | 29-y      | 48.400                       |
|                         |           |                              |           |                              |
| T2-KT2,6''-M5,5,3'',3'' | 1         | 65.490                       | 1-y       | 66.047                       |
|                         |           |                              |           |                              |
| T3-ET6,2''              | 1         | 59.732                       | 1-y       | 60.371                       |

|                       |    |        |            |        |
|-----------------------|----|--------|------------|--------|
|                       |    |        |            |        |
| T3-M5,3"-ET6,2"       | 1  | 66.952 | 1-y        | 67.309 |
|                       |    |        |            |        |
| T4-KT2,6"-M5,5,3",3"  | 1  | 67.499 | 1-y        | 68.058 |
|                       |    |        |            |        |
| T5-KT2,6"- M5,5,3",3" | 1  | 69.510 | 1-y        | 70.211 |
|                       |    |        |            |        |
| T5-KT6"-M3",3"-ET2"   | 1  | 65.224 | 1-y        | 65.763 |
|                       |    |        |            |        |
| T6-M5,3"-ET6,4"       | 3  | 67.429 | 3-y        | 67.765 |
|                       |    |        | 3-y-in-out | 67.784 |
|                       |    |        | 3-y-in-in  | 69.537 |
|                       |    |        |            |        |
| T6-KT2,6"-M5,5,3",3"  | 1  | 69.510 | 1-y        | 70.211 |
|                       |    |        |            |        |
| T7                    | 1  | 55.679 | 1-y        | 56.355 |
|                       | 2  | 55.727 | 2-y        | 57.453 |
|                       | 3  | 55.682 | 3-y        | 55.958 |
|                       | 4  | 55.806 | 4-y        | 56.110 |
|                       | 5  | 55.813 | 5-y        | 57.365 |
|                       | 6  | 55.654 | 6-y        | 56.928 |
|                       |    |        |            |        |
| T7-ET6,2"             | 1  | 59.927 | 1-y        | 60.228 |
|                       |    |        |            |        |
| T7-M5,3"-ET6,2"       | 1  | 67.154 | 1-y        | 67.621 |
|                       |    |        |            |        |
| T7-KT6"-M5,3",3"      | 1  | 64.831 | 1-y        | 65.337 |
|                       | 2  | 64.845 | 2-y        | 65.336 |
|                       | 3  | 64.884 | 3-y        | 67.001 |
|                       | 4  | 64.844 | 4-y        | 65.274 |
|                       | 5  | 65.030 | 5-y        | 66.778 |
|                       | 6  | 64.955 | 6-y        | 65.635 |
|                       | 7  | 65.012 | 7-y        | 66.622 |
|                       | 8  | 65.052 | 8-y        | 67.383 |
|                       | 9  | 64.938 | 9-y        | 66.424 |
|                       | 10 | 65.005 | 10-y       | 67.481 |
|                       |    |        |            |        |
| T7-KT2,6"-M5,5,3",3"  | 1  | 69.362 | 1-y        | 69.886 |
|                       |    |        |            |        |
| T8-KT6"-M5,3",3"      | 1  | 66.841 | 1-y        | 67.414 |
|                       | 2  | 66.857 | 2-y        | 67.332 |
|                       | 3  | 66.905 | 3-y        | 69.427 |
|                       | 4  | 66.856 | 4-y        | 67.291 |
|                       | 5  | 67.066 | 5-y        | 69.459 |

|                      |    |        |           |        |
|----------------------|----|--------|-----------|--------|
|                      | 6  | 66.968 | 6-y       | 68.048 |
|                      | 7  | 67.075 | 7-y       | 68.627 |
|                      | 8  | 67.071 | 8-y       | 69.378 |
|                      | 9  | 66.957 | 9-y       | 68.976 |
|                      | 10 | 67.060 | 10-y      | 70.518 |
|                      |    |        |           |        |
| T8-KT2-M5,5,3"       | 1  | 66.914 | 1-y       | 67.858 |
|                      | 2  | 66.890 | 2-y       | 67.369 |
|                      | 3  | 68.058 | 3-y       | 69.372 |
|                      | 4  | 66.896 | 4-y       | 67.293 |
|                      | 5  | 67.070 | 5-y       | 69.002 |
|                      | 6  | 66.966 | 6-y       | 68.607 |
|                      | 7  | 67.054 | 7-y       | 68.740 |
|                      | 8  | 67.072 | 8-y       | 68.643 |
|                      | 9  | 66.969 | 9-y       | 69.383 |
|                      | 10 | 68.270 | 10-y      | 71.199 |
|                      |    |        |           |        |
| T8-KT2,6"-M5,5,3",3" | 1  | 71.377 | 1-y       | 72.086 |
|                      |    |        |           |        |
| T9                   | 1  | 59.491 | 1-y       | 59.790 |
|                      | 2  | 59.543 | 2-y       | 61.918 |
|                      | 3  | 59.496 | 3-y       | 59.772 |
|                      | 4  | 59.618 | 4-y       | 59.923 |
|                      | 5  | 59.670 | 5-y       | 62.437 |
|                      | 6  | 59.540 | 6-y       | 60.814 |
|                      |    |        |           |        |
| T9-M5,3"             | 1  | 64.208 | 1-y       | 64.608 |
|                      | 2  | 64.273 | 2-y       | 66.752 |
|                      | 3  | 64.228 | 3-y       | 64.614 |
|                      | 4  | 64.309 | 4-y       | 64.712 |
|                      | 5  | 64.375 | 5-y       | 67.275 |
|                      | 6  | 64.295 | 6-y       | 66.012 |
|                      |    |        |           |        |
| T9-ET6,2"            | 1  | 63.799 | 1-y       | 64.120 |
|                      |    |        |           |        |
| T9-M5,3"-ET6,2"      | 1  | 71.097 |           | 71.571 |
|                      |    |        |           |        |
| T9-M5,3"-ET6,4"      | 1  | 71.306 | 1-y       | 71.642 |
|                      |    |        | 1-y-in-in | 73.420 |
|                      |    |        |           |        |
| T9-KT6"-M5,3",3"     | 1  | 68.703 | 1-y       | 69.641 |
|                      | 2  | 68.722 | 2-y       | 69.203 |
|                      | 3  | 68.776 | 3-y       | 71.825 |
|                      | 4  | 68.720 | 4-y       | 69.153 |
|                      | 5  | 68.748 | 5-y       | 70.629 |



|                       |    |        |      |        |
|-----------------------|----|--------|------|--------|
|                       | 6  | 68.911 | 6-y  | 71.789 |
|                       | 7  | 68.908 | 7-y  | 70.496 |
|                       | 8  | 68.948 | 8-y  | 71.293 |
|                       | 9  | 68.823 | 9-y  | 71.221 |
|                       | 10 | 68.909 | 10-y | 71.748 |
|                       |    |        |      |        |
| T9-KT6"-M3",3"-ET4    | 1  | 68.909 | 1-y  | 69.451 |
|                       |    |        |      |        |
| T9-KT6"-M5,3",3"-ET6  | 1  | 72.160 | 1-y  | 72.647 |
|                       | 40 | 72.300 | 40-y | 72.966 |
|                       |    |        |      |        |
| T9-KT2,6"-M5,5,3",3"  | 1  | 73.243 | 1-y  | 74.585 |
|                       |    |        |      |        |
| T10                   | 1  | 62.978 | 1-y  | 63.254 |
|                       | 2  | 63.267 | 2-y  | 65.072 |
|                       | 3  | 63.140 | 3-y  | 63.294 |
|                       | 4  | 63.163 | 4-y  | 63.580 |
|                       | 5  | 63.416 | 5-y  | 64.996 |
|                       | 6  | 63.254 | 6-y  | 64.894 |
|                       |    |        |      |        |
| T10-ET6,2"            | 1  | 67.535 | 1-y  | 67.806 |
|                       |    |        |      |        |
| T10-M5,3"-ET6,2"      | 1  | 74.617 | 1-y  | 75.096 |
|                       |    |        |      |        |
| T10-M5,3"-ET6,2",6"   | 1  | 79.163 | 1-y  | 79.405 |
|                       |    |        |      |        |
| T10-KT2,6"-M5,5,3",3" | 1  | 78.129 | 1-y  | 77.298 |
|                       |    |        |      |        |
| T11-ET6,2"            | 1  | 64.653 | 1-y  | 64.979 |
|                       |    |        |      |        |
| T11-M5,3"-ET6,2"      | 1  | 71.589 | 1-y  | 72.640 |
|                       |    |        |      |        |
| T12-KT2-M5,5,3"       | 1  | 70.461 | 1-y  | 71.663 |
|                       | 2  | 70.481 | 2-y  | 70.976 |
|                       | 3  | 70.543 | 3-y  | 75.101 |
|                       | 4  | 70.480 | 4-y  | 70.953 |
|                       | 5  | 70.696 | 5-y  | 73.730 |
|                       | 6  | 70.505 | 6-y  | 72.637 |
|                       | 7  | 70.668 | 7-y  | 72.282 |
|                       | 8  | 70.712 | 8-y  | 73.019 |
|                       | 9  | 70.550 | 9-y  | 73.306 |
|                       | 10 | 70.676 | 10-y | 75.266 |
|                       |    |        |      |        |
| T12-KT6"-M5,3",3"     | 1  | 70.456 | 1-y  | 71.411 |

|                  |    |        |            |        |
|------------------|----|--------|------------|--------|
|                  | 2  | 70.476 | 2-y        | 70.972 |
|                  | 3  | 70.541 | 3-y        | 74.250 |
|                  | 4  | 70.478 | 4-y        | 70.944 |
|                  | 5  | 70.705 | 5-y        | 74.270 |
|                  | 6  | 70.503 | 6-y        | 72.407 |
|                  | 7  | 70.660 | 7-y        | 72.287 |
|                  | 8  | 70.703 | 8-y        | 73.512 |
|                  | 9  | 70.578 | 9-y        | 73.030 |
|                  | 10 | 70.727 | 10-y       | 74.292 |
|                  |    |        |            |        |
| T13-ET6,2"       | 1  | 67.228 | 1-y        | 67.560 |
|                  |    |        |            |        |
| T13-M5,3"-ET6,2" | 1  | 74.863 | 1-y        | 75.348 |
|                  |    |        |            |        |
| T14-ET6,2"       | 1  | 70.107 | 1-y        | 70.209 |
|                  |    |        |            |        |
| T14-M5,3"-ET6,2" | 1  | 77.128 | 1-y        | 77.305 |
|                  |    |        | 1-y-in-out | 77.661 |

**Table S 7**

**Ranges of the lowering effect of Grimme's correction on the estimation of the energy of the conformers of the calculated trimeric acylphloroglucinols, grouping the molecules according to their formulas**

The lowering (table S6) is evaluated as «energy in the DFT/B3LYP/6-31+G(d,p) result minus energy in the DFT/B3LYP/6-31+G(d,p)/D-3 result». When only one conformers-pair is present for a given molecule, the value for each conformer is reported, and the two values are separated by a comma.

| molecular formula                               | molecule                | energy difference range (kcal/mol) |                    |
|-------------------------------------------------|-------------------------|------------------------------------|--------------------|
|                                                 |                         | outstretched geometry              | half-bowl geometry |
| C <sub>26</sub> H <sub>24</sub> O <sub>12</sub> | T1                      | 47.89 – 48.09                      | 48.24 – 50.33      |
| C <sub>30</sub> H <sub>32</sub> O <sub>12</sub> | T7                      | 55.68 – 55.81                      | 55.96 – 57.45      |
| C <sub>31</sub> H <sub>34</sub> O <sub>12</sub> | T3-ET6,2''              | 59.73                              | 60.37              |
| C <sub>32</sub> H <sub>36</sub> O <sub>12</sub> | T2-KT2,6''-M5,5,3'',3'' | 65.49                              | 66.05              |
|                                                 | T7-ET6,2''              | 59.93                              | 60.23              |
|                                                 | T9                      | 59.49 – 59.67                      | 59.77 – 62.44      |
|                                                 | T10                     | 62.98 – 63.42                      | 63.25 – 65.07      |
| C <sub>33</sub> H <sub>38</sub> O <sub>12</sub> | T3-M5,3''-ET6,2''       | 66.95                              | 67.31              |
|                                                 | T4-KT2,6''-M5,5,3'',3'' | 67.50                              | 68.06              |
|                                                 | T5-KT6''-M3'',3''-ET4   | 65.22                              | 65.76              |
|                                                 | T7-KT6''-M5,3'',3''     | 64.83 – 65.05                      | 65.27 – 67.48      |
|                                                 | T11-ET6,2''             | 64.65                              | 64.98              |
| C <sub>34</sub> H <sub>40</sub> O <sub>12</sub> | T5-KT2,6''-M5,5,3'',3'' | 69.51                              | 70.21              |
|                                                 | T6-M5,3''-ET6,4''       | 67.43                              | 67.77 – 69.54      |
|                                                 | T7-M5,3''-ET6,2''       | 67.15                              | 67.62              |
|                                                 | T7-KT2,6''-M5,5,3'',3'' | 69.36                              | 69.89              |
|                                                 | T8-KT6''-M5,3'',3''     | 66.84 – 67.08                      | 67.33 – 70.52      |
|                                                 | T8-KT2-M5,5,3''         | 66.89 – 68.27                      | 67.29 – 71.20      |
|                                                 | T9-M5,3''               | 64.21 – 64.38                      | 64.61 – 67.28      |
|                                                 | T9-ET6,2''              | 63.80                              | 64.12              |
|                                                 | T10-ET6,2''             | 67.54                              | 67.81              |
| C <sub>35</sub> H <sub>42</sub> O <sub>12</sub> | T8-KT2,6''-M5,5,3'',3'' | 71.38                              | 72.09              |
|                                                 | T9-KT6''-M5,3'',3''     | 68.70 – 68.95                      | 69.15 – 71.83      |
|                                                 | T9-KT6''-M3'',3''-ET4   | 68.91                              | 69.45              |
|                                                 | T11-M5,3''-ET6,2''      | 71.59                              | 72.64              |
|                                                 | T13-ET6,2''             | 67.23                              | 67.56              |
|                                                 | T14-ET6,2''             | 70.11                              | 70.21              |
| C <sub>36</sub> H <sub>44</sub> O <sub>12</sub> | T9-M5,3''-ET6,2''       | 71.10                              | 71.57              |
|                                                 | T9-M5,3''-ET6,4''       | 71.31                              | 71.64 – 73.42      |
|                                                 | T9-KT6''-M5,3'',3''-ET6 | 72.16                              | 72.65              |

|                      |                       |               |               |
|----------------------|-----------------------|---------------|---------------|
|                      | T9-KT2,6"-M5,5,3",3"  | 73.24         | 74.59         |
|                      | T10-M5,3"-ET6,2"      | 74.62         | 75.10         |
|                      | T10-KT2,6"-M5,5,3",3" | 78.13         | 77.30         |
|                      | T12-KT2-M5,5,3"       | 70.46 – 70.71 | 70.95 – 75.27 |
|                      | T12-KT6"-M5,3",3"     | 70.46 – 70.73 | 70.94 – 74.29 |
| $C_{37}H_{46}O_{12}$ | T10-M5,3"-ET6,2",6"   | 79.16         | 79.41         |
|                      | T13-M5,3"-ET6,2"      | 74.86         | 75.35         |
|                      | T14-M5,3"-ET6,2"      | 77.13         | 77.31 – 77.66 |

**Table S 8**

**Relative energies non-corrected ( $\Delta E$ , kcal/mol) and corrected for ZPE ( $\Delta E_{\text{corr}}$ , kcal/mol) and relative free energies (sum of electronic and thermal free energies,  $\Delta G$ , kcal/mol) in the HF results of representative conformers of the calculated trimeric acylphloroglucinols.**

For each molecule, the conformers are listed in order of increasing relative energy in the DFT/B3LYP/6-31+G(d,p) results.

| conformers          | HF/6-31G(d,p) |                          |            | HF/6-31+G(d,p) |                          |            |
|---------------------|---------------|--------------------------|------------|----------------|--------------------------|------------|
|                     | $\Delta E$    | $\Delta E_{\text{corr}}$ | $\Delta G$ | $\Delta E$     | $\Delta E_{\text{corr}}$ | $\Delta G$ |
| <b>structure T1</b> |               |                          |            |                |                          |            |
| 1                   | 0.000         | 0.000                    | 0.000      | 0.000          | 0.000                    | 0.000      |
| 1-y                 | 0.282         | 0.358                    | 0.385      | 0.285          | 0.348                    | 0.388      |
| 2                   | 2.477         | 2.460                    | 2.183      | 2.470          | 2.420                    | 2.100      |
| 2-y                 | 2.580         | 2.641                    | 2.363      | 2.530          | 2.542                    | 2.284      |
| 3                   | 2.630         | 2.613                    | 2.312      | 2.657          | 2.609                    | 2.277      |
| 3-y                 | 2.667         | 2.730                    | 2.466      | 2.711          | 2.728                    | 2.422      |
| 4                   | 5.220         | 5.070                    | 5.005      | 5.358          | 5.163                    | 5.078      |
| 4-y                 | 5.462         | 5.383                    | 5.374      | 5.591          | 5.457                    | 5.429      |
| 5                   | 7.686         | 7.524                    | 7.187      | 7.821          | 7.582                    | 7.162      |
| 6                   | 5.223         | 5.202                    | 4.644      | 5.218          | 5.122                    | 4.477      |
| 5-y                 | 7.792         | 7.709                    | 7.329      | 7.874          | 7.703                    | 7.334      |
| 7                   | 7.688         | 7.540                    | 7.194      | 7.793          | 7.570                    | 7.165      |
| 7-y                 | 7.755         | 7.692                    | 7.319      | 7.884          | 7.733                    | 7.327      |
| 8                   | 8.154         | 7.875                    | 7.608      | 8.151          | 7.846                    | 7.614      |
| 8-y                 | 8.336         | 8.127                    | 7.948      | 8.339          | 8.090                    | 7.941      |
| 6-y                 | 5.367         | 5.429                    | 4.973      | 5.389          | 5.363                    | 4.832      |
| 9                   | 10.381        | 10.079                   | 9.952      | 10.585         | 10.202                   | 10.024     |
| 10-y                | 8.918         | 8.980                    | 8.869      | 8.920          | 8.903                    | 8.709      |
| 10                  | 8.434         | 8.154                    | 7.889      | 8.486          | 8.170                    | 7.930      |
| 9-y                 | 10.506        | 10.297                   | 10.252     | 10.714         | 10.408                   | 10.304     |
| 11-y                | 8.532         | 8.371                    | 7.405      | 8.502          | 8.306                    | 6.515      |
| 12-y                | 10.926        | 10.592                   | 10.152     | 10.961         | 10.562                   | 10.176     |
| 12                  | 10.962        | 10.572                   | 9.938      | 10.859         | 10.423                   | 9.773      |
| 13                  | 10.690        | 10.420                   | 9.888      | 10.712         | 10.382                   | 9.847      |
| 13-y                | 10.801        | 10.624                   | 10.041     | 10.864         | 10.621                   | 10.082     |
| 15-y                | 9.342         | 9.109                    | 8.356      | 9.356          | 9.033                    | 8.059      |
| 11                  | 9.563         | 9.298                    | 8.437      | 9.450          | 9.127                    | 8.094      |
| 17-y                | 9.677         | 9.414                    | 8.693      | 9.597          | 9.238                    | 8.314      |
| 18-y                | 9.879         | 9.615                    | 8.751      | 9.597          | 9.239                    | 8.308      |
| 17                  | 10.079        | 9.726                    | 8.745      | 9.871          | 9.490                    | 8.417      |
| 15                  | 10.143        | 9.887                    | 8.907      | 10.097         | 9.776                    | 8.469      |

|                                |       |       |       |       |       |       |
|--------------------------------|-------|-------|-------|-------|-------|-------|
| structure T2-KT2,6"-M5,5,3",3" |       |       |       |       |       |       |
| 1                              | 0.000 | 0.000 | 0.000 | 0.000 | 0.000 | 0.000 |
| 1-y                            | 0.391 | 0.479 | 0.429 | 0.392 | 0.467 | 0.418 |
| structure T3-ET6,2"            |       |       |       |       |       |       |
| 1                              | 0.158 | 0.000 | 0.000 | 0.000 | 0.000 | 0.000 |
| 1-y                            | 0.000 | 0.255 | 0.354 | 0.200 | 0.247 | 0.315 |
| structure T3-M5,3"-ET6,2"      |       |       |       |       |       |       |
| 1                              | 0.030 | 0.000 | 0.000 | 0.015 | 0.000 | 0.000 |
| 1-y                            | 0.000 | 0.032 | 0.129 | 0.000 | 0.017 | 0.087 |
| structure T4-KT2,6"-M5,5,3",3" |       |       |       |       |       |       |
| 1                              | 0.000 | 0.000 | 0.000 | 0.000 | 0.000 | 0.000 |
| 1-y                            | 0.389 | 0.478 | 0.426 | 0.389 | 0.466 | 0.415 |
| structure T5-KT2,6"-M5,5,3",3" |       |       |       |       |       |       |
| 1                              | 0.000 | 0.000 | 0.000 | 0.000 | 0.000 | 0.000 |
| 1-y                            | 0.387 | 0.473 | 0.426 | 0.384 | 0.454 | 0.391 |
| structure T5-KT6"-M3",3"-ET4   |       |       |       |       |       |       |
| 1                              | 0.000 | 0.000 | 0.000 | 0.004 | 0.000 | 0.000 |
| 1-y                            | 0.017 | 0.055 | 0.082 | 0.000 | 0.018 | 0.039 |
| structure T6-M5,3"-ET6,4"      |       |       |       |       |       |       |
| 3                              | 0.000 | 0.000 | 0.000 | 0.000 | 0.000 | 0.000 |
| 3-y-out-out                    | 0.209 | 0.278 | 0.293 | 0.195 | 0.243 | 0.238 |
| 3-y-in-out                     | 0.220 | 0.294 | 0.374 | 0.184 | 0.235 | 0.304 |
| 3-y-in-in                      | 3.310 | 3.757 | 4.630 | 4.231 | 4.499 | 5.003 |
| structure T7                   |       |       |       |       |       |       |
| 1                              | 0.000 | 0.000 | 0.000 | 0.000 | 0.000 | 0.000 |
| 1-y                            | 0.280 | 0.355 | 0.387 | 0.285 | 0.345 | 0.375 |
| 2                              | 2.439 | 2.424 | 2.150 | 2.460 | 2.420 | 2.117 |
| 2-y                            | 2.534 | 2.599 | 2.330 | 2.500 | 2.526 | 2.298 |
| 4                              | 4.997 | 4.945 | 4.848 | 5.106 | 5.031 | 4.906 |
| 3                              | 2.600 | 2.585 | 2.287 | 2.621 | 2.573 | 2.237 |
| 3-y                            | 2.636 | 2.700 | 2.435 | 2.671 | 2.689 | 2.374 |
| 4-y                            | 5.235 | 5.254 | 5.216 | 5.337 | 5.319 | 5.242 |
| 5                              | 7.419 | 7.356 | 6.983 | 7.551 | 7.442 | 6.992 |
| 5-y                            | 7.491 | 7.512 | 7.145 | 7.580 | 7.537 | 7.144 |
| 6                              | 5.299 | 5.179 | 4.571 | 5.270 | 5.152 | 4.408 |
| 6-y                            | 5.220 | 5.345 | 4.876 | 5.317 | 5.268 | 4.737 |
| structure T7-ET6,2"            |       |       |       |       |       |       |

|                                       |        |        |        |        |        |        |
|---------------------------------------|--------|--------|--------|--------|--------|--------|
| 1                                     | 0.000  | 0.000  | 0.000  | 0.000  | 0.000  | 0.000  |
| 1-y                                   | 0.296  | 0.370  | 0.400  | 0.307  | 0.365  | 0.387  |
| <b>structure T7-M5,3"-ET6,2"</b>      |        |        |        |        |        |        |
| 1                                     | 0.000  | 0.000  | 0.000  | 0.000  | 0.000  | 0.000  |
| 1-y                                   | 0.201  | 0.275  | 0.328  | 0.181  | 0.234  | 0.283  |
| <b>structure T7-KT6"-M5,3",3"</b>     |        |        |        |        |        |        |
| 1                                     | 0.000  | 0.000  | 0.000  | 0.000  | 0.000  | 0.000  |
| 1-y                                   | 0.260  | 0.395  | 0.386  | 0.306  | 0.423  | 0.422  |
| 2                                     | 0.433  | 0.481  | 0.419  | 0.498  | 0.525  | 0.415  |
| 2-y                                   | 0.623  | 0.728  | 0.668  | 0.664  | 0.722  | 0.575  |
| 3                                     | 2.003  | 1.955  | 1.550  | 2.007  | 1.979  | 1.552  |
| 3-y                                   | 2.276  | 2.378  | 2.265  | 2.282  | 2.388  | 2.322  |
| 4                                     | 2.884  | 2.880  | 2.381  | 2.968  | 2.954  | 2.338  |
| 4-y                                   | 2.950  | 2.994  | 2.586  | 3.054  | 3.070  | 2.529  |
| 5                                     | 10.137 | 10.125 | 9.563  | 10.104 | 10.031 | 9.211  |
| 5-y                                   | 9.896  | 9.664  | 9.027  | 9.828  | 9.534  | 8.769  |
| 6                                     | 10.570 | 10.611 | 10.281 | 10.582 | 10.540 | 10.029 |
| 6-y                                   | 10.662 | 10.670 | 10.267 | 10.644 | 10.579 | 10.029 |
| 7-y                                   | 12.073 | 11.691 | 10.630 | 11.902 | 11.487 | 10.227 |
| 7                                     | 13.251 | 12.789 | 11.792 | 13.016 | 12.491 | 11.275 |
| 8-y                                   | 12.948 | 12.521 | 11.549 | 12.698 | 12.184 | 11.162 |
| 9-y                                   | 13.161 | 12.792 | 11.990 | 13.044 | 12.631 | 11.406 |
| 10-y                                  | 13.341 | 12.915 | 12.043 | 13.085 | 12.595 | 11.640 |
| 9                                     | 13.594 | 13.048 | 11.678 | 13.282 | 12.721 | 11.276 |
| 10                                    | 13.698 | 13.213 | 12.102 | 13.426 | 12.903 | 11.492 |
| 8                                     | 13.743 | 13.298 | 12.208 | 13.556 | 13.033 | 11.566 |
| <b>structure T7-KT2,6"-M5,5,3",3"</b> |        |        |        |        |        |        |
| 1                                     | 0.000  | 0.000  | 0.000  | 0.000  | 0.000  | 0.000  |
| 1-y                                   | 0.390  | 0.479  | 0.421  | 0.391  | 0.467  | 0.420  |
| <b>structure T8-KT6"-M5,3",3"</b>     |        |        |        |        |        |        |
| 1                                     | 0.000  | 0.000  | 0.000  | 0.000  | 0.000  | 0.000  |
| 1-y                                   | 0.268  | 0.400  | 0.388  | 0.307  | 0.420  | 0.419  |
| 2                                     | 0.436  | 0.483  | 0.420  | 0.502  | 0.528  | 0.426  |
| 2-y                                   | 0.627  | 0.730  | 0.676  | 0.668  | 0.727  | 0.577  |
| 3                                     | 1.998  | 1.950  | 1.547  | 1.996  | 1.968  | 1.544  |
| 3-y                                   | 2.281  | 2.395  | 2.727  | 2.267  | 2.378  | 2.603  |
| 4                                     | 2.878  | 2.873  | 2.374  | 2.956  | 2.943  | 2.365  |
| 4-y                                   | 2.941  | 2.986  | 2.576  | 3.039  | 3.058  | 2.508  |
| 5                                     | 10.092 | 9.825  | 9.015  | 9.962  | 9.664  | 8.712  |
| 5-y                                   | 9.844  | 9.617  | 9.344  | 9.765  | 9.463  | 8.880  |
| 6-y                                   | 10.423 | 10.308 | 9.470  | 10.375 | 10.182 | 9.148  |

|                                       |        |        |        |        |        |        |
|---------------------------------------|--------|--------|--------|--------|--------|--------|
| 6                                     | 10.644 | 10.359 | 8.757  | 10.548 | 10.225 | 8.523  |
| 7-y                                   | 11.986 | 11.614 | 10.564 | 11.836 | 11.431 | 10.178 |
| 9-y                                   | 13.288 | 12.835 | 11.429 | 12.964 | 12.518 | 11.342 |
| 8-y                                   | 12.858 | 12.440 | 11.473 | 12.584 | 12.078 | 11.054 |
| 10-y                                  | 13.132 | 12.729 | 12.748 | 12.922 | 12.432 | 11.523 |
| 9                                     | 13.479 | 12.952 | 11.782 | 13.183 | 12.644 | 11.274 |
| 7                                     | 13.163 | 12.710 | 11.724 | 12.939 | 12.426 | 11.211 |
| 10                                    | 13.585 | 13.120 | 12.039 | 13.296 | 12.780 | 11.341 |
| 8                                     | 13.653 | 13.213 | 12.117 | 13.438 | 12.921 | 11.455 |
| <b>structure T8-KT2-M5,5,3"</b>       |        |        |        |        |        |        |
| 1                                     | 0.000  | 0.000  | 0.000  | 0.000  | 0.000  | 0.000  |
| 1-y                                   | 0.262  | 0.393  | 0.382  | 0.305  | 0.415  | 0.451  |
| 2                                     | 0.440  | 0.486  | 0.417  | 0.460  | 0.480  | 0.404  |
| 2-y                                   | 0.630  | 0.733  | 0.673  | 0.665  | 0.724  | 0.599  |
| 3-y                                   | 3.807  | 4.263  | 4.081  | 3.784  | 4.201  | 3.931  |
| 4                                     | 2.188  | 2.857  | 2.388  | 2.155  | 2.920  | 2.432  |
| 3                                     | 3.571  | 3.900  | 3.492  | 3.584  | 3.903  | 3.475  |
| 4-y                                   | 2.923  | 2.969  | 2.588  | 2.932  | 2.945  | 2.496  |
| 5                                     | 10.090 | 10.087 | 9.566  | 9.981  | 9.920  | 9.269  |
| 5-y                                   | 10.291 | 10.200 | 9.900  | 9.742  | 9.447  | 8.830  |
| 6-y                                   | 10.372 | 10.268 | 9.577  | 10.321 | 10.137 | 9.240  |
| 6                                     | 10.635 | 10.363 | 9.034  | 10.442 | 10.129 | 8.844  |
| 7-y                                   | 11.970 | 11.599 | 10.601 | 11.731 | 11.335 | 10.243 |
| 9-y                                   | 13.031 | 12.665 | 12.013 | 12.867 | 12.480 | 11.502 |
| 8-y                                   | 12.841 | 12.423 | 11.433 | 12.564 | 12.051 | 10.949 |
| 9                                     | 13.453 | 12.925 | 11.560 | 13.075 | 12.536 | 11.180 |
| 7                                     | 13.130 | 12.676 | 11.670 | 12.824 | 12.321 | 11.180 |
| 8                                     | 13.667 | 13.220 | 12.102 | 13.462 | 12.959 | 11.594 |
| 10-y                                  | 14.872 | 14.840 | 14.064 | 14.603 | 14.470 | 13.494 |
| 10                                    | 15.169 | 15.068 | 13.970 | 14.859 | 14.691 | 13.347 |
| <b>structure T8-KT2,6"-M5,5,3",3"</b> |        |        |        |        |        |        |
| 1                                     | 0.000  | 0.000  | 0.000  | 0.000  | 0.000  | 0.000  |
| 1-y                                   | 0.387  | 0.474  | 0.420  | 0.422  | 0.496  | 0.430  |
| <b>structure T9</b>                   |        |        |        |        |        |        |
| 1                                     | 0.000  | 0.000  | 0.000  | 0.000  | 0.000  | 0.000  |
| 1-y                                   | 0.275  | 0.350  | 0.383  | 0.280  | 0.337  | 0.363  |
| 2                                     | 2.509  | 2.471  | 2.141  | 2.516  | 2.437  | 2.034  |
| 4                                     | 4.994  | 4.944  | 4.842  | 5.103  | 5.028  | 4.906  |
| 2-y                                   | 2.599  | 2.636  | 2.546  | 2.581  | 2.576  | 2.654  |
| 3                                     | 2.672  | 2.635  | 2.275  | 2.708  | 2.636  | 2.226  |
| 3-y                                   | 2.710  | 2.753  | 2.422  | 2.763  | 2.755  | 2.356  |
| 4-y                                   | 5.228  | 5.247  | 5.203  | 5.328  | 5.309  | 5.227  |



|                                   |        |        |        |        |        |        |
|-----------------------------------|--------|--------|--------|--------|--------|--------|
| 5                                 | 7.487  | 7.400  | 6.970  | 7.605  | 7.453  | 6.912  |
| 5-y                               | 7.553  | 7.534  | 7.140  | 7.631  | 7.541  | 7.339  |
| 6                                 | 5.859  | 5.223  | 4.552  | 5.349  | 5.206  | 4.386  |
| 6-y                               | 5.360  | 5.385  | 4.853  | 5.391  | 5.316  | 4.698  |
| <b>structure T9-M5,3"</b>         |        |        |        |        |        |        |
| 1                                 | 0.000  | 0.000  | 0.000  | 0.000  | 0.000  | 0.000  |
| 1-y                               | 0.225  | 0.307  | 0.350  | 0.216  | 0.282  | 0.318  |
| 2                                 | 1.998  | 1.956  | 1.610  | 2.028  | 2.008  | 1.620  |
| 2-y                               | 2.073  | 2.109  | 2.166  | 2.029  | 2.083  | 2.235  |
| 3                                 | 2.247  | 2.201  | 1.805  | 2.251  | 2.215  | 1.761  |
| 3-y                               | 2.269  | 2.303  | 1.963  | 2.309  | 2.345  | 1.926  |
| 4                                 | 4.626  | 4.547  | 4.187  | 4.738  | 4.658  | 4.252  |
| 4-y                               | 4.837  | 4.827  | 4.511  | 4.935  | 4.909  | 4.548  |
| 6                                 | 4.282  | 4.206  | 3.471  | 4.292  | 4.234  | 3.379  |
| 6-y                               | 4.323  | 4.337  | 3.876  | 4.365  | 4.391  | 3.881  |
| 5                                 | 6.598  | 6.480  | 5.784  | 6.707  | 6.602  | 5.837  |
| 5-y                               | 6.656  | 6.594  | 6.052  | 6.658  | 6.622  | 6.268  |
| <b>structure T9-ET6,2"</b>        |        |        |        |        |        |        |
| 1                                 | 0.000  | 0.000  | 0.000  | 0.000  | 0.000  | 0.000  |
| 1-y                               | 0.293  | 0.366  | 0.396  | 0.299  | 0.360  | 0.385  |
| <b>structure T9-M5,3"-ET6,2"</b>  |        |        |        |        |        |        |
| 1                                 | 0.000  | 0.000  | 0.000  | 0.000  | 0.000  | 0.000  |
| 1-y                               | 0.199  | 0.272  | 0.326  | 0.176  | 0.230  | 0.272  |
| <b>structure T9-M5,3"-ET6,4"</b>  |        |        |        |        |        |        |
| 3                                 | 0.000  | 0.000  | 0.000  | 0.000  | 0.000  | 0.000  |
| 3-y                               | 0.210  | 0.277  | 0.294  | 0.195  | 0.242  | 0.238  |
| 3-y-in-out                        | 0.218  | 0.292  | 0.374  | 0.183  | 0.232  | 0.287  |
| 3-y-in-in                         | 3.294  | 3.742  | 4.616  | 4.216  | 4.479  | 4.963  |
| <b>structure T9-KT6"-M5,3",3"</b> |        |        |        |        |        |        |
| 1                                 | 0.000  | 0.000  | 0.000  | 0.000  | 0.000  | 0.000  |
| 1-y                               | 0.261  | 0.393  | 0.383  | 0.352  | 0.469  | 0.474  |
| 2                                 | 0.439  | 0.486  | 0.417  | 0.545  | 0.577  | 0.467  |
| 2-y                               | 0.630  | 0.734  | 0.669  | 0.711  | 0.777  | 0.620  |
| 3                                 | 1.996  | 1.948  | 1.547  | 2.035  | 2.017  | 1.593  |
| 4                                 | 2.878  | 2.873  | 2.370  | 2.995  | 2.991  | 2.407  |
| 4-y                               | 2.941  | 2.986  | 2.570  | 3.037  | 3.060  | 2.506  |
| 3-y                               | 2.756  | 2.989  | 3.396  | 2.854  | 3.063  | 3.332  |
| 6-y                               | 11.266 | 11.154 | 10.498 | 11.341 | 11.136 | 10.106 |
| 5                                 | 11.424 | 11.222 | 10.404 | 11.406 | 11.132 | 10.001 |
| 6                                 | 11.485 | 11.220 | 10.329 | 11.467 | 11.139 | 9.888  |

|                                       |        |        |        |        |        |        |
|---------------------------------------|--------|--------|--------|--------|--------|--------|
| 5-y                                   | 11.265 | 11.157 | 11.775 | 11.238 | 10.998 | 10.787 |
| 7-y                                   | 11.961 | 11.593 | 10.546 | 11.806 | 11.404 | 10.152 |
| 9-y                                   | 12.961 | 12.632 | 12.167 | 12.968 | 12.587 | 11.616 |
| 8-y                                   | 12.831 | 12.418 | 11.448 | 12.594 | 12.099 | 11.058 |
| 9                                     | 13.451 | 12.930 | 11.762 | 13.194 | 12.661 | 11.269 |
| 7                                     | 13.136 | 12.688 | 11.703 | 12.950 | 12.449 | 11.227 |
| 10                                    | 13.555 | 13.095 | 12.015 | 13.338 | 12.841 | 11.397 |
| 8                                     | 13.645 | 13.190 | 12.096 | 13.484 | 12.989 | 11.546 |
| 10-y                                  | 12.933 | 12.580 | 12.964 | 12.893 | 12.447 | 12.157 |
| <b>structure T9-KT6"-M3",3"-ET4</b>   |        |        |        |        |        |        |
| 1                                     | 0.000  | 0.000  | 0.000  | 0.004  | 0.000  | 0.000  |
| 1-y                                   | 0.017  | 0.056  | 0.076  | 0.000  | 0.018  | 0.028  |
| <b>structure T9-KT6"-M5,3",3"-ET6</b> |        |        |        |        |        |        |
| 1                                     | 0.000  | 0.000  | 0.000  | 0.000  | 0.000  | 0.000  |
| 1-y                                   | 0.182  | 0.242  | 0.238  | 0.157  | 0.191  | 0.140  |
| 40                                    | 15.882 | 14.676 | 13.854 | 14.894 | 13.621 | 12.727 |
| 40-y                                  | 15.645 | 14.972 | 14.110 | 14.679 | 13.870 | 12.895 |
| <b>structure T9-KT2,6"-M5,5,3",3"</b> |        |        |        |        |        |        |
| 1                                     | 0.000  | 0.000  | 0.000  | 0.000  | 0.000  | 0.000  |
| 1-y                                   | 0.383  | 0.466  | 0.441  | 0.387  | 0.457  | 0.418  |
| <b>structure T10</b>                  |        |        |        |        |        |        |
| 1                                     | 0.000  | 0.000  | 0.000  | 0.067  | 0.000  | 0.000  |
| 1-y                                   | 0.380  | 0.436  | 0.244  | 0.447  | 0.444  | 0.345  |
| 2-y                                   | 2.414  | 2.462  | 2.849  | 2.441  | 2.354  | 2.589  |
| 4                                     | 4.492  | 4.430  | 4.554  | 4.658  | 4.450  | 4.549  |
| 2                                     | 2.564  | 2.535  | 2.499  | 2.594  | 2.453  | 2.423  |
| 3-y                                   | 2.577  | 2.637  | 2.690  | 2.627  | 2.535  | 2.575  |
| 3                                     | 2.748  | 2.728  | 2.621  | 2.752  | 2.625  | 2.582  |
| 4-y                                   | 4.572  | 4.583  | 4.845  | 4.744  | 4.589  | 4.802  |
| 5-y                                   | 6.996  | 6.968  | 7.092  | 7.071  | 6.846  | 7.058  |
| 5                                     | 7.152  | 7.073  | 7.195  | 7.296  | 7.038  | 7.159  |
| 6-y                                   | 5.204  | 5.234  | 5.401  | 5.140  | 4.948  | 5.104  |
| 6                                     | 5.304  | 5.262  | 5.243  | 5.316  | 5.109  | 5.156  |
| <b>structure T10-ET6,2"</b>           |        |        |        |        |        |        |
| 1                                     | 0.000  | 0.000  | 0.000  | 0.000  | 0.000  | 0.000  |
| 1-y                                   | 0.568  | 0.621  | 0.134  | 0.547  | 0.637  | 0.358  |
| <b>structure T10-M5,3"-ET6,2"</b>     |        |        |        |        |        |        |
| 1                                     | 0.030  | 0.000  | 0.000  | 0.026  | 0.005  | 0.000  |
| 1-y                                   | 0.000  | 0.021  | 0.063  | 0.000  | 0.000  | 0.046  |

|                                        |        |        |        |        |        |        |
|----------------------------------------|--------|--------|--------|--------|--------|--------|
| <b>structure T10-M5,3"-ET6,2",6"</b>   |        |        |        |        |        |        |
| 1                                      | 0.000  | 0.000  | 0.000  | 0.000  | 0.000  | 0.000  |
| 1-y                                    | 6.983  | 7.388  | 7.750  | 6.809  | 7.163  | 7.562  |
| <b>structure T10-KT2,6"-M5,5,3",3"</b> |        |        |        |        |        |        |
| 1-y                                    | 0.549  | 0.256  | 0.628  | 0.000  | 4.357  | 4.534  |
| 1                                      | 0.000  | 0.000  | 0.000  | 4.410  | 0.000  | 0.000  |
| <b>structure T11-ET6,2"</b>            |        |        |        |        |        |        |
| 1                                      | 0.080  | 0.000  | 0.000  | 0.000  | 0.000  | 0.000  |
| 1-y                                    | 0.000  | 0.583  | 0.348  | 0.511  | 0.594  | 0.476  |
| <b>structure T11-M5,3"-ET6,2"</b>      |        |        |        |        |        |        |
| 1                                      | 0.000  | 0.000  | 0.000  | 0.000  | 0.000  | 0.000  |
| 1-y                                    | 0.214  | 0.272  | 0.624  | 0.357  | 0.412  | 0.692  |
| 1-y-out-in                             | 0.566  | 0.654  | 0.624  | 0.514  | 0.622  | 0.689  |
| <b>structure T12-KT2-M5,5,3"</b>       |        |        |        |        |        |        |
| 1                                      | 0.000  | 0.000  | 0.000  | 0.000  | 0.000  | 0.000  |
| 1-y                                    | 0.263  | 0.395  | 0.380  | 0.307  | 0.417  | 0.417  |
| 2                                      | 0.439  | 0.486  | 0.413  | 0.497  | 0.527  | 0.435  |
| 2-y                                    | 0.629  | 0.734  | 0.668  | 0.663  | 0.727  | 0.585  |
| 3                                      | 1.994  | 1.947  | 1.544  | 1.987  | 1.965  | 1.557  |
| 4                                      | 2.876  | 2.872  | 2.369  | 2.945  | 2.938  | 2.372  |
| 4-y                                    | 2.939  | 2.985  | 2.567  | 3.030  | 3.053  | 2.509  |
| 3-y                                    | 3.656  | 3.993  | 4.519  | 3.734  | 4.049  | 4.379  |
| 6-y                                    | 11.255 | 11.145 | 10.498 | 11.276 | 11.067 | 10.029 |
| 5                                      | 11.413 | 11.212 | 10.382 | 11.338 | 11.063 | 9.962  |
| 6                                      | 11.475 | 11.212 | 10.318 | 11.402 | 11.076 | 9.831  |
| 5-y                                    | 11.250 | 11.126 | 11.582 | 11.135 | 10.894 | 10.807 |
| 7-y                                    | 11.947 | 11.582 | 10.531 | 11.739 | 11.338 | 10.092 |
| 9-y                                    | 12.940 | 12.610 | 12.137 | 12.882 | 12.492 | 11.529 |
| 8-y                                    | 12.816 | 12.406 | 11.436 | 12.569 | 12.078 | 11.056 |
| 9                                      | 13.430 | 12.911 | 11.738 | 13.120 | 12.587 | 11.206 |
| 7                                      | 13.120 | 12.675 | 11.686 | 12.882 | 12.382 | 11.182 |
| 10                                     | 13.534 | 13.077 | 11.995 | 13.265 | 12.767 | 11.337 |
| 10-y                                   | 12.856 | 12.478 | 12.280 | 12.731 | 12.267 | 11.915 |
| 8                                      | 13.609 | 13.177 | 12.080 | 13.416 | 12.920 | 11.487 |
| <b>structure T12-KT6"-M5,3",3"</b>     |        |        |        |        |        |        |
| 1                                      | 0.000  | 0.000  | 0.000  | 0.000  | 0.000  | 0.000  |
| 1-y                                    | 0.261  | 0.394  | 0.382  | 0.306  | 0.417  | 0.404  |
| 2                                      | 0.438  | 0.485  | 0.416  | 0.462  | 0.483  | 0.374  |
| 2-y                                    | 0.629  | 0.734  | 0.668  | 0.629  | 0.683  | 0.523  |

|                                   |        |        |        |        |        |        |
|-----------------------------------|--------|--------|--------|--------|--------|--------|
| 3                                 | 2.003  | 1.954  | 1.548  | 1.961  | 1.930  | 1.497  |
| 3-y                               | 2.279  | 2.389  | 2.885  | 2.181  | 2.287  | 2.691  |
| 4                                 | 2.882  | 2.877  | 2.369  | 2.961  | 2.949  | 2.359  |
| 4-y                               | 2.944  | 2.989  | 2.567  | 2.965  | 2.969  | 2.348  |
| 6-y                               | 11.277 | 11.164 | 10.497 | 11.275 | 11.057 | 10.019 |
| 5                                 | 11.437 | 11.234 | 10.398 | 11.341 | 11.047 | 9.842  |
| 6                                 | 11.497 | 11.230 | 10.329 | 11.404 | 11.060 | 9.733  |
| 5-y                               | 11.591 | 11.637 | 12.438 | 11.626 | 11.505 | 11.421 |
| 7-y                               | 11.970 | 11.601 | 10.548 | 11.787 | 11.373 | 10.088 |
| 8-y                               | 12.842 | 12.429 | 11.448 | 12.523 | 12.021 | 11.000 |
| 9-y                               | 12.971 | 12.640 | 12.166 | 12.903 | 12.502 | 11.492 |
| 9                                 | 13.461 | 12.938 | 11.765 | 13.130 | 12.584 | 11.170 |
| 7                                 | 13.145 | 12.696 | 11.708 | 12.883 | 12.369 | 11.151 |
| 10                                | 13.569 | 13.106 | 12.021 | 13.279 | 12.765 | 11.295 |
| 8                                 | 13.640 | 13.203 | 12.100 | 13.428 | 12.916 | 11.444 |
| 10-y                              | 13.262 | 13.069 | 13.602 | 13.294 | 12.969 | 12.812 |
| <b>structure T13-ET6,2"</b>       |        |        |        |        |        |        |
| 1                                 | 0.000  | 0.000  | 0.000  | 0.000  | 0.000  | 0.000  |
| 1-y                               | 0.295  | 0.368  | 0.390  | 0.300  | 0.361  | 0.373  |
| <b>structure T13-M5,3"-ET6,2"</b> |        |        |        |        |        |        |
| 1                                 | 0.000  | 0.000  | 0.000  | 0.000  | 0.000  | 0.000  |
| 1-y                               | 0.200  | 0.272  | 0.309  | 0.180  | 0.231  | 0.279  |
| <b>structure T14-ET6,2"</b>       |        |        |        |        |        |        |
| 1                                 | 0.000  | 0.000  | 0.000  | 0.000  | 0.000  | 0.000  |
| 1-y                               | 0.502  | 0.558  | 0.195  | 0.482  | 0.456  | 0.404  |
| <b>structure T14-M5,3"-ET6,2"</b> |        |        |        |        |        |        |
| 1                                 | 0.000  | 0.000  | 0.000  | 0.000  | 0.000  | 0.000  |
| 1-y                               | 0.195  | 0.246  | 0.494  | 0.337  | 0.381  | 0.577  |
| 1-y-out-in                        | 0.551  | 0.636  | 0.516  | 0.502  | 0.601  | 0.611  |

**Table S 9**

**Relative energies non-corrected ( $\Delta E$ , kcal/mol) and corrected for ZPE ( $\Delta E_{\text{corr}}$ , kcal/mol) and relative free energies (sum of electronic and thermal free energies,  $\Delta G$ , kcal/mol) in the DFT results (without and with dispersion correction) of representative conformers of the calculated trimeric acylphloroglucinols.**

For each molecule, the conformers are listed in order of increasing relative energy in the DFT/B3LYP/6-31+G(d,p) results.

| conformers                               | DFT/B3LYP/6-31+G(d,p) |                          |            | DFT/B3LYP/6-31+G(d,p)-D3 |                          |            |
|------------------------------------------|-----------------------|--------------------------|------------|--------------------------|--------------------------|------------|
|                                          | $\Delta E$            | $\Delta E_{\text{corr}}$ | $\Delta G$ | $\Delta E$               | $\Delta E_{\text{corr}}$ | $\Delta G$ |
| <b>structure T1</b>                      |                       |                          |            |                          |                          |            |
| 1                                        | 0.000                 | 0.000                    | 0.000      | 0.000                    | 0.000                    | 0.000      |
| 1-y                                      | 0.325                 | 0.429                    | 0.402      | 0.093                    | 0.196                    | 0.154      |
| 2                                        | 3.432                 | 3.617                    | 3.415      | 2.844                    | 3.624                    | 3.368      |
| 2-y                                      | 3.545                 | 3.828                    | 3.609      | 3.469                    | 3.042                    | 2.018      |
| 3                                        | 3.766                 | 3.980                    | 3.790      | 3.843                    | 4.033                    | 3.771      |
| 3-y                                      | 3.794                 | 4.109                    | 3.927      | 3.604                    | 3.899                    | 3.636      |
| 4                                        | 3.858                 | 3.775                    | 3.394      | 3.843                    | 3.700                    | 3.282      |
| 4-y                                      | 4.166                 | 4.159                    | 3.680      | 3.868                    | 3.827                    | 3.392      |
| 5                                        | 7.281                 | 7.400                    | 6.843      | 7.301                    | 7.329                    | 6.669      |
| 6                                        | 7.366                 | 7.811                    | 7.390      | 7.429                    | 7.818                    | 7.318      |
| 5-y                                      | 7.375                 | 7.577                    | 7.095      | 6.480                    | 6.659                    | 6.616      |
| 7                                        | 7.424                 | 7.555                    | 6.963      | 7.447                    | 7.481                    | 6.751      |
| 7-y                                      | 7.450                 | 7.688                    | 7.095      | 7.257                    | 7.405                    | 6.649      |
| 8-y                                      | 7.465                 | 7.785                    | 7.449      | 7.106                    | 7.302                    | 6.768      |
| 6-y                                      | 7.496                 | 8.052                    | 7.682      | 7.160                    | 7.654                    | 7.113      |
| 9                                        | 7.585                 | 7.396                    | 6.573      | 7.554                    | 7.255                    | 6.375      |
| 10-y                                     | 7.717                 | 8.094                    | 7.736      | 7.141                    | 7.447                    | 6.984      |
| 10                                       | 7.768                 | 8.047                    | 7.708      | 7.737                    | 7.922                    | 7.438      |
| 9-y                                      | 7.813                 | 7.698                    | 6.791      | 7.471                    | 7.270                    | 6.394      |
| 17-y                                     | 11.608                | 11.825                   | 10.899     | 11.360                   | 11.573                   | 10.505     |
| 17                                       | 11.946                | 12.064                   | 11.163     | 12.121                   | 12.270                   | 11.288     |
| <b>structure T2-KT2,6''-M5,5,3'',3''</b> |                       |                          |            |                          |                          |            |
| 1                                        | 0.000                 | 0.000                    | 0.000      | 0.172                    | 0.097                    | 0.409      |
| 1-y                                      | 0.385                 | 0.485                    | 0.518      | 0.000                    | 0.000                    | 0.000      |
| <b>structure T3-ET6,2''</b>              |                       |                          |            |                          |                          |            |
| 1                                        | 0.000                 | 0.000                    | 0.000      | 0.154                    | 0.065                    | 0.215      |
| 1-y                                      | 0.485                 | 0.592                    | 0.508      | 0.000                    | 0.000                    | 0.000      |

|                                |       |        |        |       |       |       |
|--------------------------------|-------|--------|--------|-------|-------|-------|
| structure T3-M5,3"-ET6,2"      |       |        |        |       |       |       |
| 1                              | 0.000 | 0.000  | 0.000  | 0.329 | 0.215 | 0.198 |
| 1-y                            | 0.028 | 0.145  | 0.174  | 0.000 | 0.000 | 0.000 |
| structure T4-KT2,6"-M5,5,3",3" |       |        |        |       |       |       |
| 1                              | 0.000 | 0.000  | 0.000  | 0.177 | 0.096 | 0.368 |
| 1-y                            | 0.383 | 0.476  | 0.521  | 0.000 | 0.000 | 0.000 |
| structure T5-KT2,6"-M5,5,3",3" |       |        |        |       |       |       |
| 1                              | 0.000 | 0.000  | 0.000  | 0.330 | 0.221 | 0.338 |
| 1-y                            | 0.370 | 0.467  | 0.418  | 0.000 | 0.000 | 0.000 |
| structure T5-KT6"-M3",3"-ET4   |       |        |        |       |       |       |
| 1                              | 0.000 | 0.000  | 0.000  | 0.454 | 0.387 | 0.562 |
| 1-y                            | 0.086 | 0.168  | 0.207  | 0.000 | 0.000 | 0.000 |
| structure T6-M5,3"-ET6,4"      |       |        |        |       |       |       |
| 3                              | 0.000 | 0.000  | 0.000  | 0.195 | 0.089 | 0.132 |
| 3-y                            | 0.141 | 0.188  | 0.081  | 0.000 | 0.000 | 0.000 |
| 3-y-in-out                     | 0.190 | 0.274  | 0.236  | 0.030 | 0.013 | 0.003 |
| 3-y-in-in                      | 4.737 | 5.106  | 5.417  | 2.823 | 3.224 | 3.818 |
| structure T7                   |       |        |        |       |       |       |
| 1                              | 0.000 | 0.000  | 0.000  | 0.000 | 0.000 | 0.000 |
| 1-y                            | 1.007 | 1.212  | 1.320  | 0.331 | 0.549 | 0.673 |
| 2                              | 3.467 | 3.622  | 3.419  | 3.419 | 3.535 | 3.293 |
| 2-y                            | 3.626 | 3.857  | 3.650  | 1.852 | 2.198 | 2.775 |
| 4                              | 3.636 | 3.654  | 3.325  | 3.509 | 3.507 | 3.105 |
| 3                              | 3.837 | 4.017  | 3.809  | 3.834 | 3.980 | 3.697 |
| 3-y                            | 3.863 | 4.148  | 3.953  | 3.584 | 3.850 | 3.564 |
| 4-y                            | 3.946 | 4.059  | 3.647  | 3.516 | 3.618 | 3.185 |
| 5                              | 7.001 | 7.206  | 6.615  | 6.867 | 7.017 | 6.370 |
| 5-y                            | 7.121 | 15.274 | 17.526 | 5.435 | 5.893 | 6.728 |
| 6                              | 7.372 | 7.782  | 7.381  | 7.317 | 7.658 | 7.152 |
| 6-y                            | 7.448 | 7.971  | 7.658  | 6.199 | 6.795 | 7.429 |
| structure T7-ET6,2"            |       |        |        |       |       |       |
| 1                              | 0.000 | 0.000  | 0.000  | 0.000 | 0.000 | 0.000 |
| 1-y                            | 0.347 | 0.462  | 0.441  | 0.046 | 0.152 | 0.138 |
| structure T7-M5,3"-ET6,2"      |       |        |        |       |       |       |
| 1                              | 0.000 | 0.000  | 0.000  | 0.188 | 0.074 | 0.096 |
| 1-y                            | 0.279 | 0.377  | 0.366  | 0.000 | 0.000 | 0.000 |
| structure T7-KT6"-M5,3",3"     |       |        |        |       |       |       |

|                                       |       |       |       |       |       |       |
|---------------------------------------|-------|-------|-------|-------|-------|-------|
| 1                                     | 0.000 | 0.000 | 0.000 | 0.219 | 0.110 | 0.329 |
| 1-y                                   | 0.287 | 0.403 | 0.421 | 0.000 | 0.000 | 0.000 |
| 2                                     | 0.610 | 0.666 | 0.619 | 0.816 | 0.777 | 0.971 |
| 2-y                                   | 0.898 | 1.072 | 1.012 | 0.612 | 0.667 | 0.662 |
| 3                                     | 2.911 | 3.067 | 2.802 | 3.077 | 3.125 | 3.045 |
| 3-y                                   | 3.226 | 3.513 | 3.311 | 1.275 | 1.679 | 2.835 |
| 4                                     | 4.168 | 4.418 | 4.068 | 4.373 | 4.548 | 4.424 |
| 4-y                                   | 4.311 | 4.652 | 4.349 | 4.088 | 4.369 | 4.214 |
| <b>structure T7-KT2,6"-M5,5,3",3"</b> |       |       |       |       |       |       |
| 1                                     | 0.000 | 0.000 | 0.000 | 0.140 | 0.060 | 0.314 |
| 1-y                                   | 0.384 | 0.459 | 0.401 | 0.000 | 0.000 | 0.000 |
| <b>structure T8-KT6"-M5,3",3"</b>     |       |       |       |       |       |       |
| 1                                     | 0.000 | 0.000 | 0.000 | 0.324 | 0.201 | 0.431 |
| 1-y                                   | 0.249 | 0.379 | 0.429 | 0.000 | 0.000 | 0.000 |
| 2                                     | 0.574 | 0.648 | 0.619 | 0.882 | 0.849 | 1.135 |
| 2-y                                   | 0.860 | 1.039 | 0.980 | 0.694 | 0.739 | 0.747 |
| 3                                     | 2.856 | 3.025 | 2.820 | 3.118 | 3.178 | 3.247 |
| 3-y                                   | 3.242 | 3.554 | 3.465 | 0.981 | 1.429 | 2.912 |
| 4                                     | 4.108 | 4.382 | 4.107 | 4.418 | 4.598 | 4.594 |
| 4-y                                   | 4.252 | 4.602 | 4.308 | 4.127 | 4.408 | 4.315 |
| <b>structure T8-KT2-M5,5,3"</b>       |       |       |       |       |       |       |
| 1                                     | 0.000 | 0.000 | 0.000 | 0.670 | 0.418 | 0.131 |
| 1-y                                   | 0.274 | 0.375 | 0.356 | 0.000 | 0.000 | 0.000 |
| 2                                     | 0.538 | 0.604 | 0.573 | 1.232 | 1.062 | 0.745 |
| 2-y                                   | 0.834 | 1.005 | 0.926 | 1.049 | 0.956 | 0.491 |
| 3-y                                   | 3.060 | 3.340 | 3.154 | 1.272 | 1.659 | 2.646 |
| 4                                     | 4.039 | 4.285 | 3.930 | 4.727 | 4.732 | 4.085 |
| 3                                     | 4.041 | 4.420 | 4.128 | 3.568 | 3.749 | 3.222 |
| 4-y                                   | 4.135 | 4.479 | 4.186 | 4.427 | 4.554 | 3.921 |
| <b>structure T8-KT2,6"-M5,5,3",3"</b> |       |       |       |       |       |       |
| 1                                     | 0.000 | 0.000 | 0.000 | 0.336 | 0.221 | 0.257 |
| 1-y                                   | 0.373 | 0.474 | 0.451 | 0.000 | 0.000 | 0.000 |
| <b>structure T9</b>                   |       |       |       |       |       |       |
| 1                                     | 0.000 | 0.000 | 0.538 | 0.000 | 0.000 | 0.000 |
| 1-y                                   | 0.319 | 0.468 | 3.415 | 0.020 | 0.139 | 0.145 |
| 2                                     | 3.452 | 3.611 | 3.268 | 3.401 | 3.534 | 3.306 |
| 4                                     | 3.632 | 3.648 | 3.729 | 3.506 | 3.510 | 3.120 |
| 2-y                                   | 3.655 | 3.901 | 3.815 | 1.229 | 1.728 | 3.186 |
| 3                                     | 3.810 | 3.997 | 3.926 | 3.805 | 3.975 | 3.734 |
| 3-y                                   | 3.836 | 4.132 | 3.746 | 3.555 | 3.823 | 3.572 |

|                              |       |       |       |       |       |       |
|------------------------------|-------|-------|-------|-------|-------|-------|
| 4-y                          | 3.933 | 4.080 | 6.672 | 3.501 | 3.623 | 3.247 |
| 5                            | 7.067 | 7.234 | 6.884 | 6.888 | 7.013 | 6.379 |
| 5-y                          | 7.252 | 7.481 | 7.438 | 4.307 | 4.912 | 6.265 |
| 6                            | 7.419 | 7.806 | 7.624 | 7.370 | 7.698 | 7.230 |
| 6-y                          | 7.503 | 7.984 | 0.538 | 6.181 | 6.760 | 7.478 |
| structure T9-M5,3"           |       |       |       |       |       |       |
| 1                            | 0.000 | 0.000 | 0.000 | 0.134 | 0.010 | 0.065 |
| 1-y                          | 0.266 | 0.364 | 0.308 | 0.000 | 0.000 | 0.000 |
| 2                            | 2.866 | 3.012 | 2.763 | 2.936 | 2.981 | 2.807 |
| 2-y                          | 3.067 | 3.333 | 3.184 | 0.657 | 1.067 | 2.277 |
| 3                            | 3.323 | 3.528 | 3.287 | 3.437 | 3.539 | 3.367 |
| 3-y                          | 3.356 | 3.683 | 3.473 | 3.084 | 3.272 | 3.016 |
| 4                            | 3.654 | 3.713 | 3.098 | 3.687 | 3.663 | 3.176 |
| 4-y                          | 3.934 | 4.087 | 3.367 | 3.564 | 3.673 | 3.172 |
| 6                            | 6.240 | 6.637 | 6.153 | 6.287 | 6.576 | 6.151 |
| 6-y                          | 6.358 | 6.862 | 6.426 | 4.689 | 5.360 | 6.510 |
| 5                            | 6.479 | 6.710 | 5.882 | 6.446 | 6.610 | 5.932 |
| 5-y                          | 6.687 | 7.032 | 6.325 | 3.754 | 4.419 | 5.732 |
| structure T9-ET6,2"          |       |       |       |       |       |       |
| 1                            | 0.000 | 0.000 | 0.000 | 0.000 | 0.000 | 0.000 |
| 1-y                          | 0.346 | 0.438 | 0.396 | 0.025 | 0.147 | 0.124 |
| structure T9-M5,3"-ET6,2"    |       |       |       |       |       |       |
| 1                            | 0.000 | 0.000 | 0.000 | 0.195 | 0.095 | 0.204 |
| 1-y                          | 0.279 | 0.375 | 0.351 | 0.000 | 0.000 | 0.000 |
| structure T9-M5,3"-ET6,4"    |       |       |       |       |       |       |
| 3                            | 0.000 | 0.000 | 0.000 | 0.150 | 0.075 | 0.167 |
| 3-y                          | 0.186 | 0.252 | 0.216 | 0.000 | 0.000 | 0.000 |
| 3-y-in-out                   |       | 2.895 | 4.922 | 0.030 | 3.200 | 3.832 |
| 3-y-in-in                    | 4.738 | 5.099 | 5.395 | 2.773 | 3.200 | 3.832 |
| structure T9-KT6"-M5,3",3"   |       |       |       |       |       |       |
| 1                            | 0.000 | 0.000 | 0.000 | 0.672 | 0.429 | 0.307 |
| 1-y                          | 0.266 | 0.377 | 0.395 | 0.000 | 0.000 | 0.000 |
| 2                            | 0.544 | 0.599 | 0.526 | 1.196 | 1.026 | 0.900 |
| 2-y                          | 0.868 | 1.032 | 0.963 | 1.040 | 0.964 | 0.629 |
| 3                            | 2.853 | 3.006 | 2.767 | 3.452 | 3.358 | 2.946 |
| 4                            | 4.070 | 4.336 | 4.035 | 4.725 | 4.768 | 4.361 |
| 4-y                          | 4.210 | 4.549 | 4.245 | 4.431 | 4.565 | 4.079 |
| 3-y                          | 4.268 | 4.598 | 4.935 | 1.817 | 2.275 | 4.004 |
| structure T9-KT6"-M3",3"-ET4 |       |       |       |       |       |       |



|                                        |        |        |        |        |        |        |
|----------------------------------------|--------|--------|--------|--------|--------|--------|
| 1                                      | 0.000  | 0.000  | 0.000  | 0.457  | 0.406  | 0.616  |
| 1-y                                    | 0.085  | 0.147  | 0.130  | 0.000  | 0.000  | 0.000  |
| <b>structure T9-KT6"-M5,3",3"-ET6</b>  |        |        |        |        |        |        |
| 1                                      | 0.000  | 0.000  | 0.000  | 0.000  | 0.000  | 0.070  |
| 1-y                                    | 0.530  | 0.644  | 0.616  | 0.043  | 0.137  | 0.000  |
| 40                                     | 18.045 | 17.560 | 16.211 | 17.905 | 17.301 | 16.046 |
| 40-y                                   | 18.364 | 18.019 | 16.699 | 17.558 | 17.027 | 15.380 |
| <b>structure T9-KT2,6"-M5,5,3",3"</b>  |        |        |        |        |        |        |
| 1                                      | 0.000  | 0.000  | 0.000  | 0.962  | 0.685  | 0.000  |
| 1-y                                    | 0.380  | 0.478  | 0.557  | 0.000  | 0.000  | 0.434  |
| <b>structure T10</b>                   |        |        |        |        |        |        |
| 1                                      | 0.000  | 0.000  | 0.000  | 0.001  | 0.000  | 0.000  |
| 1-y                                    | 0.275  | 0.402  | 0.365  | 0.000  | 0.118  | 0.028  |
| 2-y                                    | 3.744  | 4.067  | 3.961  | 1.651  | 2.083  | 2.999  |
| 4                                      | 3.784  | 3.802  | 3.742  | 3.600  | 3.574  | 3.382  |
| 2                                      | 3.831  | 4.010  | 3.724  | 3.544  | 3.641  | 3.104  |
| 3-y                                    | 3.987  | 4.314  | 4.015  | 3.671  | 3.981  | 3.552  |
| 3                                      | 4.030  | 4.246  | 4.005  | 3.870  | 4.059  | 3.725  |
| 4-y                                    | 4.303  | 4.419  | 4.305  | 3.702  | 3.758  | 3.397  |
| 5-y                                    | 7.582  | 7.885  | 7.482  | 5.565  | 5.873  | 6.204  |
| 5                                      | 7.720  | 7.902  | 7.474  | 7.283  | 7.363  | 6.652  |
| 6-y                                    | 7.926  | 8.459  | 7.792  | 6.011  | 6.834  | 8.325  |
| 6                                      | 7.942  | 8.379  | 7.724  | 7.667  | 8.021  | 7.140  |
| <b>structure T10-ET6,2"</b>            |        |        |        |        |        |        |
| 1                                      | 0.000  | 0.000  | 0.000  | 0.000  | 0.000  | 0.000  |
| 1-y                                    | 0.303  | 0.400  | 0.323  | 0.032  | 0.173  | 0.242  |
| <b>structure T10-M5,3"-ET6,2"</b>      |        |        |        |        |        |        |
| 1                                      | 0.000  | 16.847 | 31.825 | 0.000  | 0.000  | 0.309  |
| 1-y                                    | 0.569  | 0.000  | 0.000  | 0.089  | 0.128  | 0.000  |
| <b>structure T10-M5,3"-ET6,2",6"</b>   |        |        |        |        |        |        |
| 1                                      | 0.000  | 0.000  | 0.000  | 0.000  | 0.000  | 0.170  |
| 1-y                                    | 0.728  | 0.789  | 0.798  | 0.486  | 0.446  | 0.000  |
| <b>structure T10-KT2,6"-M5,5,3",3"</b> |        |        |        |        |        |        |
| 1-y                                    | 0.000  | 0.000  | 0.000  | 0.000  | 0.000  | 0.000  |
| 1                                      | 3.800  | 3.560  | 3.500  | 4.632  | 4.222  | 3.159  |
| <b>structure T11-ET6,2"</b>            |        |        |        |        |        |        |
| 1                                      | 0.000  | 0.000  | 0.000  | 0.000  | 0.000  | 0.000  |
| 1-y                                    | 0.388  | 0.420  | 0.419  | 0.062  | 0.185  | 0.142  |

|                                    |       |       |       |       |       |       |
|------------------------------------|-------|-------|-------|-------|-------|-------|
| <b>structure T11-M5,3"-ET6,2"</b>  |       |       |       |       |       |       |
| 1                                  | 0.000 | 0.000 | 0.000 | 1.048 | 0.931 | 0.181 |
| 1-y                                | 0.003 | 0.136 | 0.720 | 0.000 | 0.000 | 0.000 |
| 1-y-out-in                         | 0.508 | 0.576 | 0.354 | 1.054 | 1.012 | 0.011 |
| <b>structure T12-KT2-M5,5,3"</b>   |       |       |       |       |       |       |
| 1                                  | 0.000 | 0.000 | 0.000 | 0.930 | 0.490 | 0.000 |
| 1-y                                | 0.272 | 0.375 | 0.280 | 0.000 | 0.000 | 0.630 |
| 2                                  | 0.575 | 0.654 | 0.634 | 1.485 | 1.144 | 0.670 |
| 2-y                                | 0.865 | 1.052 | 1.027 | 1.280 | 1.040 | 0.430 |
| 3                                  | 2.851 | 3.011 | 2.754 | 3.699 | 3.431 | 2.635 |
| 4                                  | 4.107 | 4.371 | 4.062 | 5.018 | 4.867 | 4.046 |
| 4-y                                | 4.238 | 4.617 | 4.370 | 4.677 | 4.622 | 3.837 |
| 3-y                                | 4.590 | 5.052 | 5.092 | 0.880 | 1.322 | 2.455 |
| <b>structure T12-KT6"-M5,3",3"</b> |       |       |       |       |       |       |
| 1                                  | 0.000 | 0.000 | 0.000 | 0.688 | 0.409 | 0.061 |
| 1-y                                | 0.267 | 0.369 | 0.356 | 0.000 | 0.000 | 0.000 |
| 2                                  | 0.581 | 0.621 | 0.537 | 1.250 | 1.028 | 0.631 |
| 2-y                                | 0.869 | 1.042 | 1.022 | 1.041 | 0.899 | 0.298 |
| 3                                  | 2.865 | 3.016 | 2.774 | 3.469 | 3.340 | 2.720 |
| 3-y                                | 3.260 | 3.590 | 3.781 | 0.155 | 0.555 | 1.653 |
| 4                                  | 4.079 | 4.342 | 4.062 | 4.746 | 4.755 | 4.128 |
| 4-y                                | 4.255 | 4.614 | 4.359 | 4.456 | 4.534 | 3.827 |
| <b>structure T13-ET6,2"</b>        |       |       |       |       |       |       |
| 1                                  | 0.000 | 0.000 | 0.000 | 0.000 | 0.000 | 0.000 |
| 1-y                                | 0.355 | 0.428 | 0.230 | 0.023 | 0.151 | 0.166 |
| <b>structure T13-M5,3"-ET6,2"</b>  |       |       |       |       |       |       |
| 1                                  | 0.000 | 0.000 | 0.000 | 0.203 | 0.090 | 0.189 |
| 1-y                                | 0.281 | 0.358 | 0.287 | 0.000 | 0.000 | 0.000 |
| <b>structure T14-ET6,2"</b>        |       |       |       |       |       |       |
| 1                                  | 0.000 | 0.000 | 0.000 | 0.000 | 0.000 | 0.000 |
| 1-y                                | 0.614 | 0.656 | 0.695 | 0.513 | 0.567 | 0.513 |
| <b>structure T14-M5,3"-ET6,2"</b>  |       |       |       |       |       |       |
| 1-y                                | 0.000 | 0.150 | 0.000 | 0.000 | 0.000 | 0.178 |
| 1                                  | 0.011 | 0.000 | 0.834 | 0.188 | 0.247 | 0.000 |
| 1-y-out-in                         | 0.517 | 0.583 | 0.410 | 0.161 | 0.330 | 0.134 |

**Table S 10**

**ZPE correction for representative conformers of the calculated trimeric acylphloroglucinols.**

Results from HF/6-31G(d,p), HF/6-31+G(d,p), DFT/B3LYP/6-31+G(d,p), and DFT/B3LYP/6-31+G(d,p) with the Grimme' correction calculations, respectively denoted as HF, HF+, DFT and DFT-D3 in the column headings.

For each molecule, the conformers are listed in order of increasing relative energy in the DFT/B3LYP/6-31+G(d,p) results.

| conformers                            | ZPE correction (kcal/mol) |         |         |         |
|---------------------------------------|---------------------------|---------|---------|---------|
|                                       | HF                        | HF+     | DFT     | DFT-D3  |
| <b>structure T1</b>                   |                           |         |         |         |
| 1                                     | 322.204                   | 321.460 | 296.728 | 297.286 |
| 1-y                                   | 322.279                   | 321.524 | 296.832 | 297.388 |
| 2                                     | 322.187                   | 321.411 | 296.913 | 297.441 |
| 2-y                                   | 322.265                   | 321.473 | 297.011 | 297.483 |
| 3                                     | 322.187                   | 321.413 | 296.942 | 297.476 |
| 3-y                                   | 322.267                   | 321.478 | 297.043 | 297.579 |
| 4                                     | 322.053                   | 321.266 | 296.645 | 297.142 |
| 4-y                                   | 322.125                   | 321.327 | 296.721 | 297.244 |
| 5                                     | 322.042                   | 321.221 | 296.847 | 297.314 |
| 6                                     | 322.184                   | 321.365 | 297.173 | 297.674 |
| 5-y                                   | 322.122                   | 321.289 | 296.929 | 297.465 |
| 7                                     | 322.056                   | 321.237 | 296.859 | 297.319 |
| 7-y                                   | 322.141                   | 321.310 | 296.965 | 297.433 |
| 8                                     | 321.926                   | 321.155 |         |         |
| 8-y                                   | 321.995                   | 321.212 | 297.048 | 297.481 |
| 6-y                                   | 322.265                   | 321.434 | 297.284 | 297.779 |
| 9                                     | 321.902                   | 321.078 | 296.539 | 296.987 |
| 10-y                                  | 322.265                   | 321.443 | 297.106 | 297.590 |
| 10                                    | 321.923                   | 321.145 | 297.006 | 297.470 |
| 9-y                                   | 321.995                   | 321.156 | 296.614 | 297.085 |
| 17-y                                  | 321.941                   | 321.102 | 296.945 | 297.498 |
| 17                                    | 321.851                   | 321.080 | 296.846 | 297.434 |
| <b>structure T2-KT2,6"-M5,5,3",3"</b> |                           |         |         |         |
| 1                                     | 435.164                   | 434.133 | 401.568 | 402.846 |
| 1-y                                   | 435.252                   | 434.208 | 401.669 | 402.921 |
| <b>structure T3-ET6,2"</b>            |                           |         |         |         |
| 1                                     | 417.095                   | 416.147 | 385.569 | 386.428 |
| 1-y                                   | 417.170                   | 416.195 | 385.676 | 386.515 |

|                                       |         |         |         |         |
|---------------------------------------|---------|---------|---------|---------|
| <b>structure T3-M5,3"-ET6,2"</b>      |         |         |         |         |
| 1                                     | 453.754 | 452.786 | 419.908 | 421.007 |
| 1-y                                   | 453.815 | 452.818 | 420.024 | 421.121 |
| <b>structure T4-KT2,6"-M5,5,3",3"</b> |         |         |         |         |
| 1                                     | 454.165 | 453.097 | 419.421 | 420.716 |
| 1-y                                   | 454.253 | 453.174 | 419.513 | 420.796 |
| <b>structure T5-KT2,6"-M5,5,3",3"</b> |         |         |         |         |
| 1                                     | 473.165 | 472.064 | 437.270 | 438.570 |
| 1-y                                   | 473.251 | 472.135 | 437.367 | 438.679 |
| <b>structure T5-KT6"-M3",3"-ET4</b>   |         |         |         |         |
| 1                                     | 454.630 | 453.582 | 420.675 | 421.702 |
| 1-y                                   | 454.667 | 453.604 | 420.756 | 421.769 |
| <b>structure T6-M5,3"-ET6,4"</b>      |         |         |         |         |
| 3                                     | 472.681 | 471.667 | 438.003 | 439.034 |
| 3-y                                   | 472.750 | 471.715 | 438.048 | 439.140 |
| 3-y-in-out                            | 472.755 | 471.717 | 438.087 | 439.123 |
| 3-y-in-in                             | 473.128 | 471.934 | 438.372 | 439.541 |
| <b>structure T7</b>                   |         |         |         |         |
| 1                                     | 398.132 | 397.245 | 367.934 | 368.706 |
| 1-y                                   | 398.207 | 397.305 | 368.139 | 368.924 |
| 2                                     | 398.117 | 397.205 | 368.089 | 368.822 |
| 2-y                                   | 398.197 | 397.271 | 368.165 | 369.052 |
| 4                                     | 398.082 | 397.170 | 367.952 | 368.702 |
| 3                                     | 398.117 | 397.198 | 368.114 | 368.851 |
| 3-y                                   | 398.197 | 397.263 | 368.219 | 368.972 |
| 4-y                                   | 398.152 | 397.228 | 368.047 | 368.808 |
| 5                                     | 398.069 | 397.137 | 368.139 | 368.855 |
| 5-y                                   | 398.154 | 397.203 | 368.367 | 369.163 |
| 6                                     | 398.092 | 397.127 | 368.345 | 369.047 |
| 6-y                                   | 398.179 | 397.197 | 368.457 | 369.302 |
| <b>structure T7-ET6,2"</b>            |         |         |         |         |
| 1                                     | 436.014 | 435.054 | 403.409 | 404.251 |
| 1-y                                   | 436.088 | 435.112 | 403.524 | 404.358 |
| <b>structure T7-M5,3"-ET6,2"</b>      |         |         |         |         |
| 1                                     | 472.674 | 471.692 | 437.762 | 438.837 |
| 1-y                                   | 472.748 | 471.745 | 437.859 | 438.951 |
| <b>structure T7-KT6"-M5,3",3"</b>     |         |         |         |         |

|                                       |         |         |         |         |
|---------------------------------------|---------|---------|---------|---------|
| 1                                     | 454.125 | 453.105 | 419.873 | 420.882 |
| 1-y                                   | 454.260 | 453.223 | 419.989 | 420.991 |
| 2                                     | 454.173 | 453.132 | 419.929 | 420.953 |
| 2-y                                   | 454.230 | 453.164 | 420.046 | 421.047 |
| 3                                     | 454.077 | 453.077 | 420.029 | 421.039 |
| 3-y                                   | 454.227 | 453.211 | 420.160 | 421.395 |
| 4                                     | 454.121 | 453.091 | 420.123 | 421.166 |
| 4-y                                   | 454.169 | 453.122 | 420.213 | 421.273 |
| <b>structure T7-KT2,6"-M5,5,3",3"</b> |         |         |         |         |
| 1                                     | 473.124 | 472.016 | 437.192 | 438.547 |
| 1-y                                   | 473.213 | 472.092 | 437.267 | 438.628 |
| <b>structure T8-KT6"-M5,3",3"</b>     |         |         |         |         |
| 1                                     | 473.125 | 472.070 | 437.705 | 438.734 |
| 1-y                                   | 473.258 | 472.183 | 437.836 | 438.857 |
| 2                                     | 473.173 | 472.097 | 437.779 | 438.824 |
| 2-y                                   | 473.230 | 472.129 | 437.883 | 438.902 |
| 3                                     | 473.077 | 472.043 | 437.873 | 438.917 |
| 3-y                                   | 473.240 | 472.182 | 438.016 | 439.305 |
| 4                                     | 473.121 | 472.057 | 437.979 | 439.037 |
| 4-y                                   | 473.170 | 472.089 | 438.055 | 439.139 |
| <b>structure T8-KT2-M5,5,3"</b>       |         |         |         |         |
| 1                                     | 473.129 | 472.079 | 437.722 | 438.756 |
| 1-y                                   | 473.260 | 472.190 | 437.824 | 439.008 |
| 2                                     | 473.174 | 472.099 | 437.788 | 438.837 |
| 2-y                                   | 473.232 | 472.138 | 437.893 | 438.915 |
| 3-y                                   | 473.585 | 472.497 | 438.003 | 439.396 |
| 4                                     | 473.124 | 472.072 | 437.968 | 439.012 |
| 3                                     | 473.457 | 472.398 | 438.100 | 439.190 |
| 4-y                                   | 473.174 | 472.092 | 438.066 | 439.135 |
| <b>structure T8-KT2,6"-M5,5,3",3"</b> |         |         |         |         |
| 1                                     | 492.124 | 490.981 | 455.026 | 456.404 |
| 1-y                                   | 492.211 | 491.055 | 455.126 | 456.519 |
| <b>structure T9</b>                   |         |         |         |         |
| 1                                     | 436.108 | 435.152 | 403.557 | 404.419 |
| 1-y                                   | 436.183 | 435.209 | 403.707 | 404.537 |
| 2                                     | 436.069 | 435.073 | 403.717 | 404.553 |
| 4                                     | 436.058 | 435.078 | 403.574 | 404.423 |
| 2-y                                   | 436.144 | 435.147 | 403.803 | 404.918 |
| 3                                     | 436.070 | 435.080 | 403.745 | 404.589 |
| 3-y                                   | 436.151 | 435.145 | 403.854 | 404.687 |

|                                     |         |         |         |         |
|-------------------------------------|---------|---------|---------|---------|
| 4-y                                 | 436.126 | 435.134 | 403.704 | 404.540 |
| 5                                   | 436.021 | 435.000 | 403.724 | 404.544 |
| 5-y                                 | 436.089 | 435.062 | 403.786 | 405.024 |
| 6                                   | 436.045 | 435.009 | 403.944 | 404.746 |
| 6-y                                 | 436.133 | 435.077 | 404.039 | 404.998 |
| <b>structure T9-M5,3"</b>           |         |         |         |         |
| 1                                   | 473.148 | 472.099 | 438.230 | 438.990 |
| 1-y                                 | 473.230 | 472.165 | 438.327 | 439.113 |
| 2                                   | 473.106 | 472.079 | 438.375 | 439.158 |
| 2-y                                 | 473.184 | 472.154 | 438.496 | 439.524 |
| 3                                   | 473.102 | 472.063 | 438.434 | 439.216 |
| 3-y                                 | 473.181 | 472.135 | 438.557 | 439.302 |
| 4                                   | 473.068 | 472.019 | 438.289 | 439.089 |
| 4-y                                 | 473.139 | 472.073 | 438.382 | 439.222 |
| 6                                   | 473.072 | 472.042 | 438.626 | 439.403 |
| 6-y                                 | 473.162 | 472.125 | 438.734 | 439.785 |
| 5                                   | 473.031 | 471.995 | 438.461 | 439.278 |
| 5-y                                 | 473.085 | 472.064 | 438.575 | 439.778 |
| <b>structure T9-ET6,2"</b>          |         |         |         |         |
| 1                                   | 473.973 | 472.946 | 439.039 | 439.966 |
| 1-y                                 | 474.045 | 473.007 | 439.131 | 440.088 |
| <b>structure T9-M5,3"-ET6,2"</b>    |         |         |         |         |
| 1                                   | 510.647 | 509.586 | 473.370 | 474.544 |
| 1-y                                 | 510.721 | 509.639 | 473.467 | 474.645 |
| <b>structure T9-M5,3"-ET6,4"</b>    |         |         |         |         |
| 3                                   | 510.630 | 509.544 | 473.584 | 474.721 |
| 3-y                                 | 510.697 | 509.590 | 473.650 | 474.796 |
| 3-y-in-out                          | 510.703 | 509.594 | 473.785 | 475.223 |
| 3-y-in-in                           | 511.078 | 509.806 | 473.946 | 475.223 |
| <b>structure T9-KT6"-M5,3",3"</b>   |         |         |         |         |
| 1                                   | 492.084 | 490.986 | 455.483 | 456.586 |
| 1-y                                 | 492.216 | 491.102 | 455.593 | 456.829 |
| 2                                   | 492.130 | 491.018 | 455.539 | 456.659 |
| 2-y                                 | 492.188 | 491.053 | 455.646 | 456.754 |
| 3                                   | 492.036 | 490.968 | 455.636 | 456.735 |
| 4                                   | 492.080 | 490.982 | 455.749 | 456.872 |
| 4-y                                 | 492.130 | 491.009 | 455.823 | 456.962 |
| 3-y                                 | 492.318 | 491.196 | 455.814 | 457.287 |
| <b>structure T9-KT6"-M3",3"-ET4</b> |         |         |         |         |

|                                        |         |         |         |         |
|----------------------------------------|---------|---------|---------|---------|
| 1                                      | 492.545 | 491.417 | 456.196 | 457.376 |
| 1-y                                    | 492.584 | 491.439 | 456.258 | 457.428 |
| <b>structure T9-KT6"-M5,3",3"-ET6</b>  |         |         |         |         |
| 1                                      | 510.881 | 509.763 | 473.109 | 474.441 |
| 1-y                                    | 510.942 | 509.796 | 473.223 | 474.535 |
| 40                                     | 509.913 | 508.704 | 472.623 | 473.836 |
| 40-y                                   | 509.972 | 508.740 | 472.763 | 473.910 |
| <b>structure T9-KT2,6"-M5,5,3",3"</b>  |         |         |         |         |
| 1                                      | 511.082 | 509.904 | 472.783 | 474.242 |
| 1-y                                    | 511.166 | 509.975 | 472.881 | 474.519 |
| <b>structure T10</b>                   |         |         |         |         |
| 1                                      | 436.010 | 435.015 | 403.311 | 404.282 |
| 1-y                                    | 436.066 | 435.079 | 403.437 | 404.401 |
| 2-y                                    | 436.058 | 434.996 | 403.634 | 404.716 |
| 4                                      | 435.949 | 434.875 | 403.330 | 404.258 |
| 2                                      | 435.981 | 434.942 | 403.490 | 404.381 |
| 3-y                                    | 436.071 | 434.990 | 403.638 | 404.593 |
| 3                                      | 435.991 | 434.956 | 403.527 | 404.473 |
| 4-y                                    | 436.021 | 434.928 | 403.427 | 404.339 |
| 5-y                                    | 435.987 | 434.857 | 403.614 | 404.591 |
| 5                                      | 435.931 | 434.824 | 403.493 | 404.362 |
| 6-y                                    | 436.040 | 434.891 | 403.844 | 405.105 |
| 6                                      | 435.968 | 434.875 | 403.748 | 404.637 |
| <b>structure T10-ET6,2"</b>            |         |         |         |         |
| 1                                      | 473.892 | 472.783 | 438.754 | 439.768 |
| 1-y                                    | 473.944 | 472.873 | 438.852 | 439.910 |
| <b>structure T10-M5,3"-ET6,2"</b>      |         |         |         |         |
| 1                                      | 510.407 | 509.244 | 474.508 | 474.338 |
| 1-y                                    | 510.457 | 509.266 | 473.091 | 474.377 |
| <b>structure T10-M5,3"-ET6,2",6"</b>   |         |         |         |         |
| 1                                      | 528.253 | 527.041 | 490.001 | 491.302 |
| 1-y                                    | 528.658 | 527.396 | 490.062 | 491.262 |
| <b>structure T10-KT2,6"-M5,5,3",3"</b> |         |         |         |         |
| 1-y                                    | 511.165 | 509.801 | 472.618 | 474.347 |
| 1                                      | 511.033 | 509.854 | 472.377 | 473.937 |
| <b>structure T11-ET6,2"</b>            |         |         |         |         |
| 1                                      | 454.961 | 453.907 | 420.995 | 421.990 |
| 1-y                                    | 455.022 | 453.990 | 421.120 | 422.113 |

| <b>structure T11-M5,3"-ET6,2"</b>  |         |         |         |         |
|------------------------------------|---------|---------|---------|---------|
| 1                                  | 491.535 | 490.451 | 455.281 | 456.527 |
| 1-y                                | 491.592 | 490.507 | 455.414 | 456.643 |
| 1-y-out-in                         | 491.624 | 490.560 | 455.349 | 456.601 |
| <b>structure T12-KT2-M5,5,3"</b>   |         |         |         |         |
| 1                                  | 511.073 | 509.935 | 473.256 | 474.419 |
| 1-y                                | 511.205 | 510.044 | 473.359 | 474.859 |
| 2                                  | 511.120 | 509.964 | 473.335 | 474.518 |
| 2-y                                | 511.178 | 509.998 | 473.444 | 474.620 |
| 3                                  | 511.026 | 509.912 | 473.415 | 474.591 |
| 4                                  | 511.069 | 509.927 | 473.520 | 474.708 |
| 4-y                                | 511.119 | 509.958 | 473.635 | 474.805 |
| 3-y                                | 511.410 | 510.250 | 473.718 | 475.301 |
| <b>structure T12-KT6"-M5,3",3"</b> |         |         |         |         |
| 1                                  | 511.073 | 509.942 | 473.270 | 474.443 |
| 1-y                                | 511.206 | 510.054 | 473.372 | 474.722 |
| 2                                  | 511.121 | 509.964 | 473.310 | 474.500 |
| 2-y                                | 511.178 | 509.997 | 473.444 | 474.580 |
| 3                                  | 511.025 | 509.911 | 473.421 | 474.593 |
| 3-y                                | 511.184 | 510.049 | 473.600 | 475.123 |
| 4                                  | 511.070 | 509.930 | 473.532 | 474.731 |
| 4-y                                | 511.119 | 509.945 | 473.629 | 474.800 |
| <b>structure T13-ET6,2"</b>        |         |         |         |         |
| 1                                  | 492.940 | 491.854 | 456.742 | 457.760 |
| 1-y                                | 493.014 | 491.916 | 456.815 | 457.888 |
| <b>structure T13-M5,3"-ET6,2"</b>  |         |         |         |         |
| 1                                  | 529.520 | 528.401 | 491.116 | 492.424 |
| 1-y                                | 529.592 | 528.453 | 491.192 | 492.538 |
| <b>structure T14-ET6,2"</b>        |         |         |         |         |
| 1                                  | 492.890 | 491.849 | 456.582 | 457.701 |
| 1-y                                | 492.945 | 491.823 | 456.623 | 457.754 |
| <b>structure T14-M5,3"-ET6,2"</b>  |         |         |         |         |
| 1                                  | 529.382 | 528.201 | 490.839 | 492.194 |
| 1-y                                | 529.434 | 528.245 | 491.001 | 492.145 |
| 1-y-out-in                         | 529.467 | 528.299 | 490.917 | 492.315 |



**Table S 11**

**Ranges of the ZPE correction for the conformers of the calculated trimeric acylphloroglucinols, grouping the molecules according to their formulas.**

Since the difference between conformers with outstretched geometry and corresponding conformers with half-bowl-shaped geometry is marginal with respect to the value of the ZPE correction, the distinction between the two conformer types has been neglected for molecules with many conformers. When only one conformers-pair is present for a given molecule, the value for each conformer is reported, and the two values are separated by a comma.

| molecular formula    | molecule                | range of ZPE correction (kcal/mol) |                 |
|----------------------|-------------------------|------------------------------------|-----------------|
|                      |                         | DFT results                        | DFT-D3 results  |
| $C_{26}H_{24}O_{12}$ | T1                      | 296.54–297.28                      | 296.99–297.78   |
| $C_{30}H_{32}O_{12}$ | T7                      | 367.93–368.46                      | 368.70–369.30   |
| $C_{31}H_{34}O_{12}$ | T3-ET6,2''              | 385.57 , 385.68                    | 386.43 , 386.52 |
| $C_{32}H_{36}O_{12}$ | T2-KT2,6''-M5,5,3'',3'' | 401.57 , 401.67                    | 402.85 , 402.92 |
|                      | T7-ET6,2''              | 403.41 , 403.52                    | 404.25 , 404.36 |
|                      | T9                      | 403.56–404.04                      | 404.42–405.02   |
|                      | T10                     | 403.31–403.84                      | 404.26–405.11   |
| $C_{33}H_{38}O_{12}$ | T3-M5,3''-ET6,2''       | 419.91 , 420.02                    | 421.01 , 421.12 |
|                      | T4-KT2,6''-M5,5,3'',3'' | 419.42 , 419.51                    | 420.72 , 420.80 |
|                      | T5-KT6''-M3'',3''-ET4   | 420.68, 420.76                     | 421.70, 421.77  |
|                      | T7-KT6''-M5,3'',3''     | 419.87–420.21                      | 420.88–421.27   |
|                      | T11-ET6,2''             | 421.00, 421.12                     | 421.99, 422.11  |
| $C_{34}H_{40}O_{12}$ | T5-KT2,6''-M5,5,3'',3'' | 437.27, 437.37                     | 438.57, 438.68  |
|                      | T6-M5,3''-ET6,4''       | 438.00, 438.37                     | 439.03, 439.54  |
|                      | T7-M5,3''-ET6,2''       | 437.76, 437.86                     | 438.84, 438.95  |
|                      | T7-KT2,6''-M5,5,3'',3'' | 437.19, 437.27                     | 438.55, 438.63  |
|                      | T8-KT6''-M5,3'',3''     | 437.71–438.06                      | 438.73–439.31   |
|                      | T8-KT2-M5,5,3''         | 437.72–438.10                      | 438.76–439.30   |
|                      | T9-M5,3''               | 438.23–438.73                      | 438.99–439.79   |
|                      | T9-ET6,2''              | 439.04, 439.13                     | 439.97, 440.09  |
|                      | T10-ET6,2''             | 438.75, 438.85                     | 439.77, 439.91  |
| $C_{35}H_{42}O_{12}$ | T8-KT2,6''-M5,5,3'',3'' | 455.03, 455.13                     | 456.40, 456.52  |
|                      | T9-KT6''-M5,3'',3''     | 455.48–455.82                      | 456.59–457.29   |
|                      | T9-KT6''-M3'',3''-ET4   | 456.20, 456.26                     | 457.43, 457.38  |
|                      | T11-M5,3''-ET6,2''      | 455.28, 455.41                     | 456.53, 456.64  |
|                      | T13-ET6,2''             | 456.74, 456.82                     | 457.76, 457.89  |
|                      | T14-ET6,2''             | 456.58, 456.62                     | 457.70, 457.75  |
| $C_{36}H_{44}O_{12}$ | T9-M5,3''-ET6,2''       | 473.37, 473.47                     | 474.54, 474.65  |
|                      | T9-M5,3''-ET6,4''       | 473.58, 473.95                     | 474.72, 475.22  |

|                      |                       |                |                |
|----------------------|-----------------------|----------------|----------------|
|                      | T9-KT6"-M5,3",3"-ET6  | 473.11, 473.22 | 474.44, 474.54 |
|                      | T9-KT2,6"-M5,5,3",3"  | 472.78, 472.88 | 474.24, 474.52 |
|                      | T10-M5,3"-ET6,2"      | 474.51, 473.09 | 474.34, 474.38 |
|                      | T10-KT2,6"-M5,5,3",3" | 472.62, 472.38 | 474.35, 473.94 |
|                      | T12-KT2-M5,5,3"       | 473.26, 473.72 | 474.42, 475.30 |
|                      | T12-KT6"-M5,3",3"     | 473.27, 473.63 | 474.44, 474.80 |
| $C_{37}H_{46}O_{12}$ | T10-M5,3"-ET6,2",6"   | 490.00, 490.06 | 491.30, 491.26 |
|                      | T13-M5,3"-ET6,2"      | 491.12, 491.19 | 492.42, 492.54 |
|                      | T14-M5,3"-ET6,2"      | 490.84, 491.00 | 492.19, 492.15 |

**Table S 12****Bond lengths of the intramolecular hydrogen bonds in the calculated trimeric acylphloroglucinols**

HF/6-31G(d,p), HF/6-31+G(d,p), DFT/B3LYP//6-31+G(d,p) without Grimme's correction and DFT/B3LYP/6-31+G(d,p) with Grimme's correction results in vacuo, respectively denoted as HF, HF+, DFT and DFT-D3 in the columns' headings. Conformers of the same pair (outstretched and half-bowl-shaped) are listed one after the other to facilitate their comparison; the pairs are listed in order of increasing relative energy in the DFT/B3LYP/6-31+G(d,p) results.

The IHBs of a given conformer are listed "reading" the molecular geometry from left to right. The IHBs for which O14 (or O14' or O14'') is the acceptor are the first IHBs in the corresponding monomers, and are listed first. The IHBs between monomers (IMHBs) are listed considering them in the following order: above the methylene bridge between the first and the second monomer; below the methylene bridge between the first and the second monomer; above the methylene bridge between the second and the third monomer; below the methylene bridge between the second and the third monomer. The atom numbering is shown in fig. 2.

| Conformer    | IHB considered | Length of given H-bond (Å) |       |       |        |
|--------------|----------------|----------------------------|-------|-------|--------|
|              |                | HF                         | HF+   | DFT   | DFT-D3 |
| structure T1 |                |                            |       |       |        |
| 1            | H15....O14     | 1.626                      | 1.631 | 1.473 | 1.480  |
|              | H17'....O14'   | 1.622                      | 1.627 | 1.474 | 1.483  |
|              | H17''....O14'' | 1.632                      | 1.637 | 1.483 | 1.491  |
|              | H16'....O8     | 1.815                      | 1.822 | 1.709 | 1.689  |
|              | H16....O12'    | 1.851                      | 1.855 | 1.758 | 1.741  |
|              | H16''....O10'  | 1.857                      | 1.866 | 1.771 | 1.750  |
|              | H15'....O12''  | 1.847                      | 1.854 | 1.749 | 1.732  |
| 1-y          | H15....O14     | 1.630                      | 1.634 | 1.476 | 1.483  |
|              | H17'....O14'   | 1.624                      | 1.629 | 1.474 | 1.483  |
|              | H17''....O14'' | 1.632                      | 1.637 | 1.484 | 1.494  |
|              | H16'....O8     | 1.837                      | 1.846 | 1.726 | 1.702  |
|              | H16....O12'    | 1.863                      | 1.868 | 1.761 | 1.746  |
|              | H16''....O10'  | 1.847                      | 1.879 | 1.781 | 1.760  |
|              | H15'....O12''  | 1.870                      | 1.855 | 1.750 | 1.735  |
| 2            | H15....O14     | 1.624                      | 1.629 | 1.469 | 1.477  |
|              | H17'....O14'   | 1.625                      | 1.629 | 1.478 | 1.487  |
|              | H15''....O14'' | 1.691                      | 1.696 | 1.557 | 1.568  |
|              | H16'....O8     | 1.857                      | 1.818 | 1.701 | 1.682  |
|              | H16....O12'    | 1.811                      | 1.861 | 1.766 | 1.749  |
|              | H17''....O10'  | 1.885                      | 1.858 | 1.758 | 1.737  |
|              | H15'....O10''  | 1.849                      | 1.897 | 1.801 | 1.788  |

|     |                |       |       |       |       |
|-----|----------------|-------|-------|-------|-------|
| 2-y | H15....O14     | 1.626 | 1.631 | 1.471 | 1.474 |
|     | H17'....O14'   | 1.627 | 1.632 | 1.478 | 1.490 |
|     | H15''....O14'' | 1.691 | 1.697 | 1.557 | 1.573 |
|     | H16'....O8     | 1.828 | 1.837 | 1.714 | 1.675 |
|     | H16....O12'    | 1.867 | 1.872 | 1.770 | 1.761 |
|     | H17''....O10'  | 1.860 | 1.871 | 1.767 | 1.727 |
|     | H15'....O10''  | 1.889 | 1.903 | 1.805 | 1.810 |
| 3   | H15....O14     | 1.631 | 1.636 | 1.481 | 1.490 |
|     | H15'....O14'   | 1.621 | 1.627 | 1.470 | 1.480 |
|     | H15''....O14'' | 1.690 | 1.696 | 1.556 | 1.567 |
|     | H17'....O8     | 1.846 | 1.853 | 1.746 | 1.730 |
|     | H16....O10'    | 1.861 | 1.870 | 1.780 | 1.760 |
|     | H17''....O8'   | 1.836 | 1.843 | 1.742 | 1.726 |
|     | H16'....O10''  | 1.852 | 1.865 | 1.769 | 1.753 |
| 3-y | H15....O14     | 1.631 | 1.636 | 1.481 | 1.490 |
|     | H15'....O14'   | 1.632 | 1.629 | 1.471 | 1.481 |
|     | H15''....O14'' | 1.690 | 1.696 | 1.556 | 1.567 |
|     | H17'....O8     | 1.844 | 1.851 | 1.747 | 1.732 |
|     | H16....O10'    | 1.865 | 1.874 | 1.782 | 1.762 |
|     | H17''....O8'   | 1.849 | 1.855 | 1.747 | 1.731 |
|     | H16'....O10''  | 1.870 | 1.884 | 1.780 | 1.760 |
| 4   | H15....O14     | 1.650 | 1.656 | 1.492 | 1.502 |
|     | H17'....O14'   | 1.623 | 1.628 | 1.475 | 1.483 |
|     | H17''....O14'' | 1.632 | 1.637 | 1.483 | 1.492 |
|     | H10'....O8     | 1.819 | 1.828 | 1.716 | 1.697 |
|     | H16....O12'    | 1.852 | 1.858 | 1.759 | 1.742 |
|     | H16''....O10'  | 1.858 | 1.867 | 1.771 | 1.751 |
|     | H15'....O12''  | 1.848 | 1.855 | 1.750 | 1.733 |
| 4-y | H15....O14     | 1.650 | 1.661 | 1.496 | 1.505 |
|     | H17'....O14'   | 1.625 | 1.631 | 1.475 | 1.484 |
|     | H17''....O14'' | 1.633 | 1.638 | 1.484 | 1.494 |
|     | H10'....O8     | 1.842 | 1.852 | 1.733 | 1.709 |
|     | H16....O12'    | 1.867 | 1.873 | 1.764 | 1.749 |
|     | H16''....O10'  | 1.871 | 1.880 | 1.781 | 1.762 |
|     | H15'....O12''  | 1.850 | 1.858 | 1.751 | 1.737 |
| 5   | H15....O14     | 1.648 | 1.653 | 1.490 | 1.499 |
|     | H17'....O14'   | 1.625 | 1.630 | 1.479 | 1.488 |
|     | H15''....O14'' | 1.691 | 1.697 | 1.557 | 1.568 |
|     | H16'....O8     | 1.816 | 1.824 | 1.709 | 1.790 |
|     | H16....O12'    | 1.859 | 1.864 | 1.768 | 1.751 |
|     | H16''....O10'  | 1.850 | 1.859 | 1.758 | 1.738 |
|     | H15'....O10''  | 1.886 | 1.898 | 1.802 | 1.788 |

|     |                |       |       |       |       |
|-----|----------------|-------|-------|-------|-------|
| 5-y | H15....O14     | 1.649 | 1.656 | 1.491 | 1.500 |
|     | H17'....O14'   | 1.628 | 1.633 | 1.479 | 1.496 |
|     | H15''....O14'' | 1.693 | 1.699 | 1.559 | 1.584 |
|     | H16'....O8     | 1.831 | 1.841 | 1.720 | 1.686 |
|     | H16....O12'    | 1.868 | 1.875 | 1.771 | 1.779 |
|     | H16''....O10'  | 1.858 | 1.870 | 1.765 | 1.724 |
|     | H15'....O10''  | 1.889 | 1.905 | 1.805 | 1.837 |
| 6   | H17....O14     | 1.692 | 1.698 | 1.559 | 1.570 |
|     | H15'....O14'   | 1.624 | 1.629 | 1.475 | 1.485 |
|     | H15''....O14'' | 1.690 | 1.696 | 1.556 | 1.567 |
|     | H15....O10'    | 1.857 | 1.866 | 1.770 | 1.750 |
|     | H17'....O10    | 1.887 | 1.898 | 1.800 | 1.788 |
|     | H16'....O10''  | 1.851 | 1.863 | 1.764 | 1.749 |
|     | H17''....O8'   | 1.843 | 1.850 | 1.751 | 1.735 |
| 6-y | H17....O14     | 1.694 | 1.700 | 1.561 | 1.572 |
|     | H15'....O14'   | 1.626 | 1.632 | 1.476 | 1.487 |
|     | H15''....O14'' | 1.691 | 1.696 | 1.556 | 1.567 |
|     | H15....O10'    | 1.866 | 1.877 | 1.777 | 1.756 |
|     | H17'....O10    | 1.890 | 1.902 | 1.806 | 1.800 |
|     | H16'....O10''  | 1.867 | 1.882 | 1.774 | 1.754 |
|     | H17''....O8'   | 1.854 | 1.861 | 1.754 | 1.742 |
| 7   | H15....O14     | 1.654 | 1.661 | 1.500 | 1.511 |
|     | H15'....O14'   | 1.622 | 1.627 | 1.472 | 1.481 |
|     | H15''....O14'' | 1.690 | 1.696 | 1.556 | 1.567 |
|     | H17'....O8     | 1.850 | 1.857 | 1.753 | 1.736 |
|     | H16....O10'    | 1.863 | 1.871 | 1.780 | 1.761 |
|     | H17''....O8'   | 1.840 | 1.846 | 1.744 | 1.728 |
|     | H16'....O10''  | 1.853 | 1.866 | 1.769 | 1.753 |
| 7-y | H15....O14     | 1.654 | 1.660 | 1.501 | 1.511 |
|     | H15'....O14'   | 1.623 | 1.629 | 1.473 | 1.482 |
|     | H15''....O14'' | 1.691 | 1.696 | 1.556 | 1.568 |
|     | H17'....O8     | 1.846 | 1.854 | 1.753 | 1.738 |
|     | H16....O10'    | 1.863 | 1.873 | 1.780 | 1.761 |
|     | H17''....O8'   | 1.845 | 1.853 | 1.747 | 1.731 |
|     | H16'....O10''  | 1.862 | 1.878 | 1.775 | 1.755 |
| 8   | H17....O14     | 1.626 | 1.631 |       |       |
|     | H15'....O14'   | 1.625 | 1.631 |       |       |
|     | H17''....O14'' | 1.742 | 1.651 |       |       |
|     | H16'....O8     | 1.811 | 1.819 |       |       |
|     | H16....O10'    | 1.856 | 1.861 |       |       |
|     | H16''....O10'  | 1.857 | 1.867 |       |       |
|     | H15'....O12''  | 1.876 | 1.889 |       |       |

|      |                |       |       |       |       |
|------|----------------|-------|-------|-------|-------|
| 8-y  | H17....O14     | 1.627 | 1.632 | 1.541 | 1.577 |
|      | H15'....O14'   | 1.629 | 1.634 | 1.482 | 1.489 |
|      | H17''....O14'' | 1.640 | 1.649 | 1.596 | 1.609 |
|      | H16'....O8     | 1.831 | 1.839 | 1.714 | 1.690 |
|      | H16....O10'    | 1.874 | 1.879 | 1.776 | 1.761 |
|      | H16''....O10'  | 1.872 | 1.882 | 1.784 | 1.769 |
|      | H15'....O12''  | 1.882 | 1.895 | 1.801 | 1.789 |
| 9    | H15....O14     | 1.650 | 1.656 | 1.493 | 1.502 |
|      | H17'....O14'   | 1.624 | 1.629 | 1.476 | 1.485 |
|      | H17''....O14'' | 1.652 | 1.659 | 1.502 | 1.512 |
|      | H16'....O8     | 1.820 | 1.827 | 1.716 | 1.696 |
|      | H16....O12'    | 1.855 | 1.859 | 1.761 | 1.744 |
|      | H16''....O10'  | 1.863 | 1.871 | 1.773 | 1.752 |
|      | H15'....O12''  | 1.855 | 1.862 | 1.756 | 1.740 |
| 9-y  | H15....O14     | 1.654 | 1.661 | 1.495 | 1.503 |
|      | H17'....O14'   | 1.626 | 1.632 | 1.477 | 1.487 |
|      | H17''....O14'' | 1.656 | 1.662 | 1.503 | 1.514 |
|      | H16'....O8     | 1.840 | 1.849 | 1.730 | 1.706 |
|      | H16....O12'    | 1.871 | 1.876 | 1.768 | 1.754 |
|      | H16''....O10'  | 1.872 | 1.881 | 1.782 | 1.762 |
|      | H15'....O12''  | 1.855 | 1.863 | 1.759 | 1.745 |
| 10   | H15....O14     | 1.632 | 1.636 | 1.482 | 1.491 |
|      | H15'....O14'   | 1.622 | 1.628 | 1.474 | 1.485 |
|      | H15''....O14'' | 1.742 | 1.751 | 1.598 | 1.612 |
|      | H17'....O8     | 1.847 | 1.855 | 1.749 | 1.732 |
|      | H16....O10'    | 1.861 | 1.869 | 1.779 | 1.758 |
|      | H17''....O8'   | 1.849 | 1.857 | 1.757 | 1.746 |
|      | H16'....O12''  | 1.844 | 1.857 | 1.763 | 1.744 |
| 10-y | H15....O14     | 1.631 | 1.636 | 1.482 | 1.491 |
|      | H15'....O14'   | 1.628 | 1.623 | 1.475 | 1.486 |
|      | H15''....O14'' | 1.739 | 1.743 | 1.598 | 1.633 |
|      | H17'....O8     | 1.846 | 1.854 | 1.752 | 1.741 |
|      | H16....O10'    | 1.861 | 1.869 | 1.776 | 1.746 |
|      | H17''....O8'   | 1.875 | 1.881 | 1.762 | 1.757 |
|      | H16'....O12''  | 1.884 | 1.888 | 1.769 | 1.733 |
| 11   | H15....O14     | 1.633 | 1.635 | 1.485 | 1.493 |
|      | H15'....O14'   | 1.630 | 1.633 | 1.485 | 1.494 |
|      | H15''....O14'' | 1.697 | 1.703 | 1.566 | 1.578 |
|      | H17'....O8     | 1.859 | 1.858 | 1.764 | 1.747 |
|      | H16'....O10    | 1.899 | 1.896 | 1.813 | 1.798 |
|      | H17''....O8'   | 1.836 | 1.838 | 1.757 | 1.738 |
|      | H16''....O10'  | 1.874 | 1.873 | 1.809 | 1.788 |

|      |                |       |       |       |       |
|------|----------------|-------|-------|-------|-------|
| 11-y | H15....O14     | 1.640 | 1.634 | 1.485 | 1.496 |
|      | H15'....O14'   | 1.629 | 1.634 | 1.486 | 1.495 |
|      | H15''....O14'' | 1.695 | 1.700 | 1.564 | 1.575 |
|      | H17'....O8     | 1.879 | 1.841 | 1.763 | 1.751 |
|      | H16....O10'    | 1.883 | 1.868 | 1.797 | 1.770 |
|      | H17''....O8'   | 1.852 | 1.843 | 1.765 | 1.749 |
|      | H16'....O10''  | 1.885 | 1.872 | 1.808 | 1.786 |
| 12   | H15....O14     | 1.622 | 1.626 | 1.462 | 1.470 |
|      | H17'....O14'   | 1.666 | 1.675 | 1.510 | 1.521 |
|      | H15''....O14'' | 1.699 | 1.703 | 1.568 | 1.580 |
|      | H16'....O8     | 1.805 | 1.812 | 1.683 | 1.666 |
|      | H16....O12'    | 1.876 | 1.881 | 1.794 | 1.776 |
|      | H17''....O10'  | 1.857 | 1.865 | 1.781 | 1.762 |
|      | H16''....O8'   | 1.904 | 1.905 | 1.827 | 1.819 |
| 12-y | H15....O14     | 1.623 | 1.628 | 1.459 | 1.461 |
|      | H17'....O14'   | 1.660 | 1.670 | 1.513 | 1.527 |
|      | H15''....O14'' | 1.697 | 1.703 | 1.568 | 1.579 |
|      | H16'....O8     | 1.820 | 1.829 | 1.686 | 1.641 |
|      | H16....O12'    | 1.886 | 1.893 | 1.803 | 1.804 |
|      | H17''....O10'  | 1.927 | 1.925 | 1.787 | 1.758 |
|      | H16''....O8'   | 1.998 | 2.000 | 1.828 | 1.846 |
| 13   | H17....O14     | 1.690 | 1.696 | 1.556 | 1.567 |
|      | H17'....O14'   | 1.625 | 1.630 | 1.478 | 1.488 |
|      | H15''....O14'' | 1.741 | 1.750 | 1.596 | 1.611 |
|      | H15....O12'    | 1.846 | 1.852 | 1.754 | 1.737 |
|      | H16'....O10    | 1.851 | 1.864 | 1.765 | 1.751 |
|      | H15'....O12''  | 1.874 | 1.887 | 1.794 | 1.778 |
|      | H16''....O10'  | 1.859 | 1.869 | 1.779 | 1.763 |
| 13-y | H17....O14     | 1.691 | 1.697 | 1.557 | 1.568 |
|      | H17'....O14'   | 1.626 | 1.632 | 1.478 | 1.488 |
|      | H15''....O14'' | 1.742 | 1.751 | 1.596 | 1.611 |
|      | H15....O12'    | 1.847 | 1.855 | 1.754 | 1.736 |
|      | H16'....O10    | 1.854 | 1.869 | 1.765 | 1.746 |
|      | H15'....O12''  | 1.870 | 1.885 | 1.795 | 1.780 |
|      | H16''....O10'  | 1.858 | 1.869 | 1.778 | 1.763 |
| 14   | H17....O14     | 1.650 | 1.656 | 1.492 | 1.501 |
|      | H15'....O14'   | 1.626 | 1.631 | 1.481 | 1.491 |
|      | H17''....O14'' | 1.642 | 1.651 | 1.596 | 1.611 |
|      | H16'....O8     | 1.816 | 1.825 | 1.710 | 1.693 |
|      | H16....O12'    | 1.859 | 1.864 | 1.770 | 1.753 |
|      | H16''....O10'  | 1.857 | 1.867 | 1.772 | 1.756 |
|      | H15'....O12''  | 1.876 | 1.889 | 1.798 | 1.781 |

|      |                |       |       |       |       |
|------|----------------|-------|-------|-------|-------|
| 14-y | H17....O14     | 1.641 | 1.660 | 1.491 | 1.499 |
|      | H15'....O14'   | 1.630 | 1.635 | 1.483 | 1.493 |
|      | H17''....O14'' | 1.652 | 1.750 | 1.596 | 1.609 |
|      | H16'....O8     | 1.834 | 1.843 | 1.720 | 1.697 |
|      | H16....O12'    | 1.876 | 1.882 | 1.778 | 1.763 |
|      | H16''....O10'  | 1.869 | 1.878 | 1.781 | 1.767 |
|      | H15'....O12''  | 1.881 | 1.894 | 1.801 | 1.789 |
| 15   | H15....O14     | 1.632 | 1.635 | 1.485 | 1.493 |
|      | H15'....O14'   | 1.637 | 1.640 | 1.490 | 1.500 |
|      | H15''....O14'' | 1.703 | 1.708 | 1.574 | 1.587 |
|      | H17'....O8     | 1.855 | 1.853 | 1.763 | 1.745 |
|      | H16....O10'    | 1.897 | 1.892 | 1.810 | 1.793 |
|      | H16''....O8'   | 1.866 | 1.859 | 1.774 | 1.760 |
|      | H17''....O10'  | 1.853 | 1.854 | 1.796 | 1.771 |
| 15-y | H15....O14     | 1.638 | 1.640 | 1.484 | 1.492 |
|      | H15'....O14'   | 1.642 | 1.646 | 1.491 | 1.500 |
|      | H15''....O14'' | 1.712 | 1.723 | 1.578 | 1.593 |
|      | H17'....O8     | 1.867 | 1.860 | 1.760 | 1.745 |
|      | H16....O10'    | 1.879 | 1.879 | 1.804 | 1.774 |
|      | H16''....O8'   | 1.918 | 1.915 | 1.780 | 1.768 |
|      | H17''....O10'  | 1.909 | 1.912 | 1.800 | 1.768 |
| 16   | H15....O14     | 1.654 | 1.661 | 1.501 | 1.512 |
|      | H15'....O14'   | 1.623 | 1.629 | 1.496 | 1.486 |
|      | H15''....O14'' | 1.741 | 1.751 | 1.597 | 1.612 |
|      | H17'....O8     | 1.851 | 1.859 | 1.755 | 1.739 |
|      | H16....O10'    | 1.862 | 1.869 | 1.778 | 1.758 |
|      | H16''....O8'   | 1.852 | 1.859 | 1.760 | 1.749 |
|      | H17'....O10''  | 1.845 | 1.858 | 1.763 | 1.743 |
| 16-y | H15....O14     | 1.650 | 1.657 | 1.502 | 1.512 |
|      | H15'....O14'   | 1.628 | 1.633 | 1.477 | 1.488 |
|      | H15''....O14'' | 1.737 | 1.741 | 1.597 | 1.623 |
|      | H17'....O8     | 1.849 | 1.857 | 1.758 | 1.747 |
|      | H16....O10'    | 1.859 | 1.868 | 1.774 | 1.743 |
|      | H16''....O8'   | 1.871 | 1.877 | 1.762 | 1.757 |
|      | H17'....O10''  | 1.876 | 1.881 | 1.763 | 1.727 |
| 17   | H17....O14     | 1.630 | 1.698 | 1.478 | 1.486 |
|      | H17'....O14'   | 1.633 | 1.633 | 1.493 | 1.501 |
|      | H17''....O14'' | 1.698 | 1.630 | 1.568 | 1.579 |
|      | H16'....O8     | 1.832 | 1.833 | 1.723 | 1.705 |
|      | H17'....O10    | 1.821 | 1.823 | 1.851 | 1.830 |
|      | H16''....O10'  | 1.879 | 1.882 | 1.812 | 1.790 |
|      | H17''....O8'   | 1.843 | 1.847 | 1.764 | 1.746 |



|      |                |       |       |       |       |
|------|----------------|-------|-------|-------|-------|
| 17-y | H17....O14     | 1.638 | 1.642 | 1.478 | 1.485 |
|      | H17'....O14'   | 1.636 | 1.638 | 1.493 | 1.502 |
|      | H17''....O14'' | 1.697 | 1.702 | 1.566 | 1.578 |
|      | H16'....O8     | 1.858 | 1.857 | 1.726 | 1.704 |
|      | H17'....O10    | 1.922 | 1.829 | 1.844 | 1.827 |
|      | H16'....O10'   | 1.901 | 1.900 | 1.821 | 1.801 |
|      | H17''....O8'   | 1.854 | 1.854 | 1.764 | 1.748 |
| 18   | H15....O14     | 1.628 | 1.631 | 1.476 | 1.483 |
|      | H15'....O14'   | 1.639 | 1.643 | 1.498 | 1.508 |
|      | H15''....O14'' | 1.700 | 1.704 | 1.571 | 1.583 |
|      | H16'....O8     | 1.831 | 1.830 | 1.720 | 1.701 |
|      | H17'....O10    | 1.926 | 1.925 | 1.853 | 1.833 |
|      | H17''....O10'  | 1.851 | 1.855 | 1.794 | 1.768 |
|      | H16''....O8'   | 1.868 | 1.865 | 1.782 | 1.769 |
| 18-y | H15....O14     | 1.633 | 1.642 | 1.475 | 1.476 |
|      | H15'....O14'   | 1.645 | 1.638 | 1.500 | 1.514 |
|      | H15''....O14'' | 1.700 | 1.701 | 1.571 | 1.583 |
|      | H16'....O8     | 1.838 | 1.857 | 1.722 | 1.677 |
|      | H17'....O10    | 1.913 | 1.929 | 1.846 | 1.842 |
|      | H17''....O10'  | 1.882 | 1.900 | 1.805 | 1.768 |
|      | H16''....O8'   | 1.898 | 1.854 | 1.787 | 1.791 |
| 19   | H15....O14     | 1.661 | 1.666 | 1.510 | 1.519 |
|      | H15'....O14'   | 1.630 | 1.634 | 1.486 | 1.495 |
|      | H15''....O14'' | 1.698 | 1.703 | 1.567 | 1.579 |
|      | H17'....O8     | 1.857 | 1.857 | 1.770 | 1.752 |
|      | H16'....O10    | 1.889 | 1.886 | 1.806 | 1.791 |
|      | H17''....O8'   | 1.838 | 1.840 | 1.758 | 1.739 |
|      | H16''....O10'  | 1.877 | 1.875 | 1.810 | 1.790 |
| 19-y | H15....O14     | 1.662 | 1.660 | 1.510 | 1.520 |
|      | H15'....O14'   | 1.630 | 1.634 | 1.488 | 1.496 |
|      | H15''....O14'' | 1.695 | 1.700 | 1.565 | 1.576 |
|      | H17'....O8     | 1.874 | 1.847 | 1.768 | 1.753 |
|      | H16'....O10    | 1.874 | 1.862 | 1.794 | 1.768 |
|      | H17''....O8'   | 1.849 | 1.843 | 1.765 | 1.748 |
|      | H16''....O10'  | 1.886 | 1.876 | 1.811 | 1.791 |
| 20   | H17....O14     | 1.660 | 1.664 | 1.505 | 1.514 |
|      | H17'....O14'   | 1.632 | 1.635 | 1.491 | 1.500 |
|      | H17''....O14'' | 1.698 | 1.703 | 1.568 | 1.579 |
|      | H16'....O8     | 1.829 | 1.831 | 1.729 | 1.711 |
|      | H17'....O10    | 1.906 | 1.910 | 1.844 | 1.823 |
|      | H16''....O10'  | 1.877 | 1.880 | 1.811 | 1.790 |
|      | H17''....O8'   | 1.842 | 1.845 | 1.763 | 1.744 |

|      |                |       |       |       |       |
|------|----------------|-------|-------|-------|-------|
| 20-y | H17....O14     | 1.671 | 1.677 | 1.505 | 1.513 |
|      | H17'....O14'   | 1.635 | 1.637 | 1.492 | 1.501 |
|      | H17''....O14'' | 1.696 | 1.701 | 1.566 | 1.577 |
|      | H16'....O8     | 1.855 | 1.854 | 1.731 | 1.709 |
|      | H17'....O10    | 1.913 | 1.921 | 1.840 | 1.822 |
|      | H16''....O10'  | 1.894 | 1.894 | 1.818 | 1.798 |
|      | H17''....O8'   | 1.852 | 1.852 | 1.764 | 1.748 |
| 21   | H15....O14     | 1.661 | 1.665 | 1.511 | 1.520 |
|      | H15'....O14'   | 1.637 | 1.640 | 1.491 | 1.501 |
|      | H15''....O14'' | 1.702 | 1.707 | 1.574 | 1.586 |
|      | H17'....O8     | 1.854 | 1.851 | 1.769 | 1.751 |
|      | H16'....O10    | 1.887 | 1.880 | 1.803 | 1.786 |
|      | H16''....O8'   | 1.865 | 1.859 | 1.775 | 1.761 |
|      | H17'....O10''  | 1.853 | 1.854 | 1.797 | 1.772 |
| 21-y | H15....O14     | 1.667 | 1.670 | 1.509 | 1.519 |
|      | H15'....O14'   | 1.642 | 1.647 | 1.492 | 1.501 |
|      | H15''....O14'' | 1.709 | 1.719 | 1.577 | 1.590 |
|      | H17'....O8     | 1.867 | 1.860 | 1.766 | 1.750 |
|      | H16'....O10    | 1.874 | 1.875 | 1.801 | 1.773 |
|      | H16''....O8'   | 1.914 | 1.908 | 1.780 | 1.767 |
|      | H17'....O10''  | 1.906 | 1.909 | 1.803 | 1.773 |
| 22   | H15....O14     | 1.658 | 1.661 | 1.503 | 1.511 |
|      | H15'....O14'   | 1.638 | 1.641 | 1.497 | 1.507 |
|      | H15''....O14'' | 1.700 | 1.705 | 1.572 | 1.584 |
|      | H16'....O8     | 1.830 | 1.829 | 1.727 | 1.708 |
|      | H17'....O10    | 1.915 | 1.914 | 1.846 | 1.825 |
|      | H17''....O10'  | 1.849 | 1.854 | 1.794 | 1.768 |
|      | H16''....O8'   | 1.867 | 1.864 | 1.781 | 1.768 |
| 22-y | H15....O14     | 1.662 | 1.669 | 1.502 | 1.499 |
|      | H15'....O14'   | 1.644 | 1.647 | 1.498 | 1.532 |
|      | H15''....O14'' | 1.701 | 1.710 | 1.573 | 1.584 |
|      | H16'....O8     | 1.833 | 1.834 | 1.727 | 1.675 |
|      | H17'....O10    | 1.903 | 1.906 | 1.841 | 1.859 |
|      | H17''....O10'  | 1.881 | 1.891 | 1.803 | 1.749 |
|      | H16''....O8'   | 1.901 | 1.898 | 1.787 | 1.884 |
| 23   | H15....O14     | 1.646 | 1.652 | 1.485 | 1.494 |
|      | H17'....O14'   | 1.668 | 1.676 | 1.512 | 1.523 |
|      | H15''....O14'' | 1.699 | 1.704 | 1.569 | 1.581 |
|      | H16'....O8     | 1.812 | 1.819 | 1.692 | 1.675 |
|      | H16....O12'    | 1.881 | 1.885 | 1.796 | 1.779 |
|      | H17''....O10'  | 1.857 | 1.865 | 1.781 | 1.762 |
|      | H16''....O8'   | 1.905 | 1.906 | 1.826 | 1.819 |

|      |                |       |       |       |       |
|------|----------------|-------|-------|-------|-------|
| 23-y | H15....O14     | 1.644 | 1.651 | 1.482 | 1.491 |
|      | H17'....O14'   | 1.676 | 1.685 | 1.514 | 1.541 |
|      | H15''....O14'' | 1.699 | 1.704 | 1.570 | 1.580 |
|      | H16'....O8     | 1.804 | 1.816 | 1.692 | 1.640 |
|      | H16....O12'    | 1.888 | 1.893 | 1.803 | 1.833 |
|      | H17''....O10'  | 1.872 | 1.881 | 1.786 | 1.843 |
|      | H16''....O8'   | 1.926 | 1.925 | 1.829 | 1.944 |
| 24   | H17....O14     | 1.649 | 1.655 | 1.487 | 1.496 |
|      | H15'....O14'   | 1.674 | 1.680 | 1.514 | 1.524 |
|      | H17''....O14'' | 1.702 | 1.708 | 1.573 | 1.584 |
|      | H16'....O8     | 1.813 | 1.821 | 1.692 | 1.675 |
|      | H16....O12'    | 1.879 | 1.884 | 1.797 | 1.780 |
|      | H16''....O10'  | 1.895 | 1.903 | 1.788 | 1.770 |
|      | H17''....O8'   | 1.919 | 1.914 | 1.810 | 1.794 |
| 24-y | H17....O14     | 1.650 | 1.658 | 1.484 | 1.492 |
|      | H15'....O14'   | 1.679 | 1.689 | 1.517 | 1.529 |
|      | H17''....O14'' | 1.700 | 1.706 | 1.571 | 1.582 |
|      | H15....O12'    | 1.818 | 1.828 | 1.695 | 1.671 |
|      | H16....O10'    | 1.895 | 1.902 | 1.810 | 1.794 |
|      | H16''....O8'   | 1.883 | 1.887 | 1.792 | 1.777 |
|      | H16'....O12''  | 1.880 | 1.886 | 1.808 | 1.798 |
| 25   | H17....O14     | 1.736 | 1.745 | 1.588 | 1.602 |
|      | H15'....O14'   | 1.632 | 1.636 | 1.489 | 1.498 |
|      | H15''....O14'' | 1.697 | 1.703 | 1.566 | 1.578 |
|      | H16'....O8     | 1.864 | 1.863 | 1.764 | 1.751 |
|      | H17'....O10    | 1.887 | 1.893 | 1.813 | 1.801 |
|      | H16''....O10'  | 1.878 | 1.875 | 1.807 | 1.786 |
|      | H17''....O8'   | 1.842 | 1.843 | 1.762 | 1.743 |
| 25-y | H17....O14     | 1.748 | 1.751 | 1.588 | 1.589 |
|      | H15'....O14'   | 1.633 | 1.636 | 1.490 | 1.499 |
|      | H15''....O14'' | 1.696 | 1.701 | 1.565 | 1.578 |
|      | H16'....O8     | 1.826 | 1.836 | 1.748 | 1.744 |
|      | H17'....O10    | 1.878 | 1.878 | 1.816 | 1.879 |
|      | H16''....O10'  | 1.875 | 1.875 | 1.805 | 1.830 |
|      | H17''....O8'   | 1.857 | 1.852 | 1.771 | 1.769 |
| 26   | H17....O14     | 1.694 | 1.699 | 1.561 | 1.573 |
|      | H15'....O14'   | 1.682 | 1.689 | 1.529 | 1.541 |
|      | H15''....O14'' | 1.701 | 1.706 | 1.572 | 1.584 |
|      | H15....O12'    | 1.887 | 1.898 | 1.820 | 1.805 |
|      | H16'....O10    | 1.844 | 1.856 | 1.752 | 1.743 |
|      | H16''....O8'   | 1.897 | 1.891 | 1.799 | 1.787 |
|      | H17''....O10'  | 1.873 | 1.878 | 1.803 | 1.780 |

|      |                |       |       |       |       |
|------|----------------|-------|-------|-------|-------|
| 26-y | H17....O14     | 1.695 | 1.701 | 1.562 | 1.587 |
|      | H15'....O14'   | 1.694 | 1.702 | 1.529 | 1.540 |
|      | H15''....O14'' | 1.703 | 1.707 | 1.574 | 1.574 |
|      | H15....O12'    | 1.881 | 1.899 | 1.820 | 1.778 |
|      | H16'....O10    | 1.833 | 1.853 | 1.750 | 1.787 |
|      | H16''....O8'   | 1.907 | 1.895 | 1.799 | 1.734 |
|      | H17''....O10'  | 1.888 | 1.887 | 1.807 | 1.808 |
| 27   | H17....O14     | 1.736 | 1.746 | 1.590 | 1.579 |
|      | H15'....O14'   | 1.637 | 1.641 | 1.490 | 1.499 |
|      | H15''....O14'' | 1.698 | 1.703 | 1.567 | 1.603 |
|      | H17'....O8     | 1.926 | 1.921 | 1.798 | 1.744 |
|      | H16'....O10    | 1.900 | 1.892 | 1.770 | 1.791 |
|      | H17''....O8'   | 1.846 | 1.848 | 1.763 | 1.778 |
|      | H16''....O10'  | 1.886 | 1.883 | 1.812 | 1.755 |
| 27-y | H17....O14     | 1.737 | 1.746 | 1.590 | 1.577 |
|      | H15'....O14'   | 1.635 | 1.637 | 1.492 | 1.500 |
|      | H15''....O14'' | 1.697 | 1.702 | 1.565 | 1.604 |
|      | H17'....O8     | 1.911 | 1.905 | 1.805 | 1.752 |
|      | H16'....O10    | 1.884 | 1.877 | 1.767 | 1.798 |
|      | H17''....O8'   | 1.847 | 1.848 | 1.769 | 1.802 |
|      | H16''....O10'  | 1.883 | 1.881 | 1.815 | 1.754 |
| 28   | H17....O14     | 1.736 | 1.746 | 1.588 | 1.603 |
|      | H15'....O14'   | 1.640 | 1.644 | 1.493 | 1.504 |
|      | H15''....O14'' | 1.703 | 1.708 | 1.575 | 1.587 |
|      | H16'....O8     | 1.865 | 1.862 | 1.761 | 1.747 |
|      | H17'....O10    | 1.885 | 1.888 | 1.812 | 1.801 |
|      | H16''....O8'   | 1.858 | 1.860 | 1.794 | 1.768 |
|      | H17'....O10''  | 1.872 | 1.866 | 1.778 | 1.765 |
| 28-y | H17....O14     | 1.740 | 1.749 | 1.587 | 1.595 |
|      | H15'....O14'   | 1.637 | 1.650 | 1.494 | 1.523 |
|      | H15''....O14'' | 1.703 | 1.726 | 1.578 | 1.596 |
|      | H16'....O8     | 1.866 | 1.867 | 1.758 | 1.784 |
|      | H17'....O10    | 1.887 | 1.912 | 1.807 | 1.899 |
|      | H16''....O8'   | 1.867 | 1.918 | 1.801 | 1.738 |
|      | H17'....O10''  | 1.865 | 1.923 | 1.783 | 1.857 |
| 29   | H17....O14     | 1.736 | 1.745 | 1.589 | 1.589 |
|      | H15'....O14'   | 1.645 | 1.651 | 1.496 | 1.496 |
|      | H15''....O14'' | 1.702 | 1.707 | 1.574 | 1.574 |
|      | H17'....O8     | 1.925 | 1.918 | 1.799 | 1.799 |
|      | H16'....O10    | 1.903 | 1.893 | 1.770 | 1.770 |
|      | H16''....O8'   | 1.874 | 1.866 | 1.781 | 1.781 |
|      | H17'....O10''  | 1.864 | 1.864 | 1.799 | 1.799 |

|                                          |                |       |       |       |       |
|------------------------------------------|----------------|-------|-------|-------|-------|
| 29-y                                     | H17....O14     | 1.735 | 1.745 | 1.590 | 1.605 |
|                                          | H15'....O14'   | 1.643 | 1.646 | 1.496 | 1.606 |
|                                          | H15''....O14'' | 1.703 | 1.708 | 1.576 | 1.590 |
|                                          | H17'....O8     | 1.920 | 1.919 | 1.798 | 1.787 |
|                                          | H16'....O10    | 1.899 | 1.897 | 1.770 | 1.748 |
|                                          | H16''....O8'   | 1.888 | 1.880 | 1.784 | 1.771 |
|                                          | H17'....O10''  | 1.879 | 1.881 | 1.806 | 1.779 |
| <b>structure T2-KT2,6''-M5,5,3'',3''</b> |                |       |       |       |       |
| 1                                        | H17....O14     | 1.637 | 1.643 | 1.451 | 1.469 |
|                                          | H15'....O14'   | 1.610 | 1.612 | 1.460 | 1.468 |
|                                          | H15''....O14'' | 1.637 | 1.643 | 1.451 | 1.469 |
|                                          | H17'....O8     | 1.745 | 1.749 | 1.640 | 1.625 |
|                                          | H16....O10'    | 1.831 | 1.836 | 1.720 | 1.696 |
|                                          | H16''....O8'   | 1.841 | 1.845 | 1.718 | 1.697 |
|                                          | H16'....O12''  | 1.709 | 1.711 | 1.580 | 1.562 |
| 1-y                                      | H17....O14     | 1.637 | 1.643 | 1.451 | 1.469 |
|                                          | H15'....O14'   | 1.612 | 1.613 | 1.460 | 1.468 |
|                                          | H15''....O14'' | 1.638 | 1.644 | 1.452 | 1.471 |
|                                          | H17'....O8     | 1.747 | 1.748 | 1.640 | 1.627 |
|                                          | H16....O10'    | 1.853 | 1.858 | 1.731 | 1.698 |
|                                          | H16''....O8'   | 1.844 | 1.848 | 1.722 | 1.704 |
|                                          | H16'....O12''  | 1.723 | 1.727 | 1.595 | 1.566 |
| <b>structure T3-ET6,2''</b>              |                |       |       |       |       |
| 1                                        | H15....O14     | 1.620 | 1.625 | 1.469 | 1.478 |
|                                          | H15'....O14'   | 1.620 | 1.630 | 1.452 | 1.464 |
|                                          | H17''....O14'' | 1.615 | 1.620 | 1.459 | 1.468 |
|                                          | H17'....O8     | 1.845 | 1.550 | 1.742 | 1.723 |
|                                          | H16....O10'    | 1.861 | 1.870 | 1.770 | 1.750 |
|                                          | H16''....O8'   | 1.853 | 1.857 | 1.754 | 1.737 |
|                                          | H16'....O12''  | 1.813 | 1.813 | 1.705 | 1.786 |
| 1-y                                      | H15....O14     | 1.621 | 1.626 | 1.470 | 1.478 |
|                                          | H15'....O14'   | 1.636 | 1.646 | 1.452 | 1.470 |
|                                          | H17''....O14'' | 1.618 | 1.623 | 1.463 | 1.471 |
|                                          | H17'....O8     | 1.846 | 1.857 | 1.743 | 1.721 |
|                                          | H16....O10'    | 1.873 | 1.883 | 1.777 | 1.764 |
|                                          | H16''....O8'   | 1.864 | 1.869 | 1.759 | 1.742 |
|                                          | H16'....O12''  | 1.834 | 1.844 | 1.722 | 1.697 |
| <b>structure T3-M5,3''-ET6,2''</b>       |                |       |       |       |       |

|                                          |                |       |       |       |       |
|------------------------------------------|----------------|-------|-------|-------|-------|
| 1                                        | H15....O14     | 1.659 | 1.668 | 1.488 | 1.499 |
|                                          | H15'....O14'   | 1.624 | 1.634 | 1.451 | 1.462 |
|                                          | H17''....O14'' | 1.649 | 1.658 | 1.479 | 1.491 |
|                                          | H17'....O8     | 1.835 | 1.646 | 1.731 | 1.771 |
|                                          | H16....O10'    | 1.854 | 1.866 | 1.760 | 1.741 |
|                                          | H16''....O8'   | 1.853 | 1.858 | 1.752 | 1.735 |
|                                          | H16'....O12''  | 1.810 | 1.818 | 1.700 | 1.682 |
| 1-y                                      | H15....O14     | 1.660 | 1.669 | 1.488 | 1.501 |
|                                          | H15'....O14'   | 1.636 | 1.646 | 1.450 | 1.462 |
|                                          | H17''....O14'' | 1.657 | 1.667 | 1.481 | 1.492 |
|                                          | H17'....O8     | 1.837 | 1.849 | 1.733 | 1.719 |
|                                          | H16....O10'    | 1.865 | 1.876 | 1.770 | 1.750 |
|                                          | H16''....O8'   | 1.857 | 1.865 | 1.749 | 1.736 |
|                                          | H16'....O12''  | 1.821 | 1.831 | 1.708 | 1.686 |
| <b>structure T4-KT2,6''-M5,5,3'',3''</b> |                |       |       |       |       |
| 1                                        | H17....O14     | 1.632 | 1.635 | 1.452 | 1.468 |
|                                          | H15'....O14'   | 1.610 | 1.612 | 1.460 | 1.468 |
|                                          | H15''....O14'' | 1.637 | 1.643 | 1.451 | 1.469 |
|                                          | H17'....O8     | 1.743 | 1.746 | 1.638 | 1.638 |
|                                          | H16....O10'    | 1.831 | 1.836 | 1.721 | 1.696 |
|                                          | H16''....O8'   | 1.841 | 1.845 | 1.717 | 1.696 |
|                                          | H16'....O12''  | 1.709 | 1.711 | 1.581 | 1.563 |
| 1-y                                      | H17....O14     | 1.631 | 1.635 | 1.451 | 1.467 |
|                                          | H15'....O14'   | 1.612 | 1.613 | 1.460 | 1.469 |
|                                          | H15''....O14'' | 1.639 | 1.644 | 1.452 | 1.471 |
|                                          | H17'....O8     | 1.745 | 1.747 | 1.637 | 1.624 |
|                                          | H16....O10'    | 1.853 | 1.858 | 1.732 | 1.700 |
|                                          | H16''....O8'   | 1.844 | 1.844 | 1.722 | 1.704 |
|                                          | H16'....O12''  | 1.723 | 1.727 | 1.596 | 1.567 |
| <b>structure T5-KT6''-M3'',3''-ET4</b>   |                |       |       |       |       |
| 1                                        | H17....O14     | 1.685 | 1.689 | 1.553 | 1.564 |
|                                          | H17'....O14'   | 1.616 | 1.619 | 1.470 | 1.479 |
|                                          | H15''....O14'' | 1.631 | 1.634 | 1.449 | 1.466 |
|                                          | H15....O12'    | 1.838 | 1.845 | 1.742 | 1.727 |
|                                          | H16'....O10    | 1.827 | 1.834 | 1.733 | 1.702 |
|                                          | H15'....O12''  | 1.741 | 1.744 | 1.636 | 1.622 |
|                                          | H16''....O10'  | 1.844 | 1.851 | 1.747 | 1.720 |
| 1-y                                      | H17....O14     | 1.685 | 1.688 | 1.553 | 1.563 |
|                                          | H17'....O14'   | 1.619 | 1.622 | 1.471 | 1.481 |

|                                       |              |       |       |       |       |
|---------------------------------------|--------------|-------|-------|-------|-------|
|                                       | H15"....O14" | 1.631 | 1.634 | 1.449 | 1.466 |
|                                       | H15....O12'  | 1.831 | 1.867 | 1.753 | 1.736 |
|                                       | H16'....O10  | 1.851 | 1.860 | 1.751 | 1.705 |
|                                       | H15'....O12" | 1.742 | 1.744 | 1.635 | 1.624 |
|                                       | H16"....O10' | 1.854 | 1.860 | 1.752 | 1.715 |
| <b>structure T5-KT2,6"-M5,5,3",3"</b> |              |       |       |       |       |
| 1                                     | H17....O14   | 1.632 | 1.635 | 1.452 | 1.468 |
|                                       | H15'....O14' | 1.610 | 1.612 | 1.460 | 1.468 |
|                                       | H15"....O14" | 1.631 | 1.635 | 1.451 | 1.468 |
|                                       | H17'....O8   | 1.743 | 1.747 | 1.638 | 1.623 |
|                                       | H16....O10'  | 1.830 | 1.835 | 1.720 | 1.696 |
|                                       | H16"....O8'  | 1.840 | 1.845 | 1.718 | 1.697 |
|                                       | H16'....O12" | 1.707 | 1.709 | 1.578 | 1.560 |
| 1-y                                   | H17....O14   | 1.631 | 1.635 | 1.451 | 1.466 |
|                                       | H15'....O14' | 1.612 | 1.613 | 1.461 | 1.471 |
|                                       | H15"....O14" | 1.632 | 1.636 | 1.452 | 1.475 |
|                                       | H17'....O8   | 1.745 | 1.747 | 1.637 | 1.628 |
|                                       | H16....O10'  | 1.853 | 1.857 | 1.731 | 1.691 |
|                                       | H16"....O8'  | 1.844 | 1.848 | 1.722 | 1.714 |
|                                       | H16'....O12" | 1.721 | 1.725 | 1.593 | 1.556 |
| <b>structure T6-M5,3"-ET6,4"</b>      |              |       |       |       |       |
| 1                                     | H15....O14   | 1.658 | 1.665 | 1.491 | 1.495 |
|                                       | H15'....O14' | 1.624 | 1.629 | 1.490 | 1.482 |
|                                       | H15"....O14" | 1.673 | 1.682 | 1.563 | 1.556 |
|                                       | H17'....O8   | 1.830 | 1.838 | 1.704 | 1.715 |
|                                       | H16....O10'  | 1.850 | 1.860 | 1.754 | 1.739 |
|                                       | H17"....O8'  | 1.853 | 1.862 | 1.780 | 1.736 |
|                                       | H16'....O10" | 1.804 | 1.807 | 1.818 | 1.660 |
|                                       |              |       |       |       |       |
| 1-y                                   | H15....O14   | 1.657 | 1.664 | 1.484 | 1.495 |
|                                       | H15'....O14' | 1.626 | 1.631 | 1.474 | 1.484 |
|                                       | H15"....O14" | 1.673 | 1.682 | 1.546 | 1.556 |
|                                       | H17'....O8   | 1.826 | 1.834 | 1.727 | 1.715 |
|                                       | H16....O10'  | 1.866 | 1.875 | 1.778 | 1.756 |
|                                       | H17"....O8'  | 1.868 | 1.875 | 1.761 | 1.743 |
|                                       | H16'....O10" | 1.821 | 1.823 | 1.698 | 1.668 |
|                                       |              |       |       |       |       |
| 1-y-in-out                            | H15....O14   | 1.654 | 1.660 | 1.485 | 1.496 |
|                                       | H15'....O14' | 1.618 | 1.630 | 1.475 | 1.484 |
|                                       | H15"....O14" | 1.674 | 1.684 | 1.546 | 1.557 |
|                                       | H17'....O8   | 1.837 | 1.842 | 1.736 | 1.722 |

|                     |                |       |       |       |       |
|---------------------|----------------|-------|-------|-------|-------|
|                     | H16....O10'    | 1.874 | 1.883 | 1.786 | 1.762 |
|                     | H17''....O8'   | 1.864 | 1.875 | 1.761 | 1.742 |
|                     | H16'....O10''  | 1.822 | 1.823 | 1.699 | 1.668 |
| 1-y-in-in           | H15....O14     | 1.651 | 1.657 | 1.484 | 1.492 |
|                     | H15'....O14'   | 1.622 | 1.633 | 1.474 | 1.489 |
|                     | H15''....O14'' | 1.687 | 1.692 | 1.549 | 1.562 |
|                     | H17'....O8     | 1.819 | 1.824 | 1.732 | 1.711 |
|                     | H16....O10'    | 1.876 | 1.885 | 1.795 | 1.764 |
|                     | H17''....O8'   | 1.895 | 1.904 | 1.771 | 1.779 |
|                     | H16'....O10''  | 1.990 | 2.909 | 1.837 | 1.823 |
| <b>structure T7</b> |                |       |       |       |       |
| 1                   | H15....O14     | 1.619 | 1.621 | 1.469 | 1.476 |
|                     | H17'....O14'   | 1.615 | 1.617 | 1.471 | 1.479 |
|                     | H17''....O14'' | 1.632 | 1.637 | 1.484 | 1.492 |
|                     | H16'....O8     | 1.813 | 1.820 | 1.706 | 1.687 |
|                     | H16....O12'    | 1.849 | 1.853 | 1.756 | 1.739 |
|                     | H16''....O10'  | 1.855 | 1.863 | 1.767 | 1.747 |
|                     | H15'....O12''  | 1.848 | 1.855 | 1.751 | 1.733 |
| 1-y                 | H15....O14     | 1.622 | 1.625 | 1.473 | 1.479 |
|                     | H17'....O14'   | 1.618 | 1.620 | 1.471 | 1.480 |
|                     | H17''....O14'' | 1.633 | 1.638 | 1.485 | 1.494 |
|                     | H16'....O8     | 1.835 | 1.843 | 1.724 | 1.699 |
|                     | H16....O12'    | 1.862 | 1.866 | 1.760 | 1.745 |
|                     | H16''....O10'  | 1.868 | 1.877 | 1.778 | 1.758 |
|                     | H15'....O12''  | 1.838 | 1.858 | 1.752 | 1.737 |
| 2                   | H15....O14     | 1.617 | 1.619 | 1.466 | 1.473 |
|                     | H17'....O14'   | 1.617 | 1.619 | 1.475 | 1.483 |
|                     | H15''....O14'' | 1.691 | 1.696 | 1.557 | 1.568 |
|                     | H16'....O8     | 1.809 | 1.816 | 1.698 | 1.679 |
|                     | H16....O12'    | 1.855 | 1.859 | 1.764 | 1.747 |
|                     | H17''....O10'  | 1.848 | 1.857 | 1.754 | 1.734 |
|                     | H15'....O10''  | 1.886 | 1.899 | 1.804 | 1.789 |
| 2-y                 | H15....O14     | 1.619 | 1.622 | 1.468 | 1.478 |
|                     | H17'....O14'   | 1.620 | 1.623 | 1.475 | 1.484 |
|                     | H15''....O14'' | 1.691 | 1.697 | 1.558 | 1.566 |
|                     | H16'....O8     | 1.825 | 1.834 | 1.712 | 1.676 |
|                     | H16....O12'    | 1.865 | 1.870 | 1.768 | 1.750 |
|                     | H17''....O10'  | 1.859 | 1.869 | 1.764 | 1.713 |
|                     | H15'....O10''  | 1.891 | 1.906 | 1.807 | 1.789 |
| 3                   | H15....O14     | 1.624 | 1.627 | 1.478 | 1.486 |
|                     | H15'....O14'   | 1.614 | 1.617 | 1.467 | 1.475 |



|     |                |       |       |       |       |
|-----|----------------|-------|-------|-------|-------|
|     | H15''....O14'' | 1.691 | 1.696 | 1.556 | 1.567 |
|     | H17'....O8     | 1.844 | 1.851 | 1.744 | 1.727 |
|     | H16....O10'    | 1.861 | 1.869 | 1.779 | 1.760 |
|     | H17''....O8'   | 1.834 | 1.840 | 1.738 | 1.722 |
|     | H16'....O10''  | 1.853 | 1.866 | 1.771 | 1.755 |
| 3-y | H15....O14     | 1.624 | 1.627 | 1.478 | 1.486 |
|     | H15'....O14'   | 1.616 | 1.619 | 1.468 | 1.476 |
|     | H15''....O14'' | 1.690 | 1.696 | 1.556 | 1.567 |
|     | H17'....O8     | 1.842 | 1.849 | 1.745 | 1.729 |
|     | H16....O10'    | 1.864 | 1.873 | 1.781 | 1.762 |
|     | H17''....O8'   | 1.846 | 1.851 | 1.743 | 1.727 |
|     | H16'....O10''  | 1.871 | 1.885 | 1.781 | 1.762 |
| 4   | H15....O14     | 1.642 | 1.647 | 1.489 | 1.498 |
|     | H17'....O14'   | 1.616 | 1.619 | 1.472 | 1.480 |
|     | H17''....O14'' | 1.633 | 1.637 | 1.484 | 1.493 |
|     | H10'....O8     | 1.817 | 1.825 | 1.712 | 1.693 |
|     | H16....O12'    | 1.852 | 1.857 | 1.758 | 1.742 |
|     | H16''....O10'  | 1.856 | 1.864 | 1.768 | 1.747 |
|     | H15'....O12''  | 1.849 | 1.857 | 1.753 | 1.734 |
| 4-y | H15....O14     | 1.646 | 1.652 | 1.493 | 1.501 |
|     | H17'....O14'   | 1.619 | 1.622 | 1.472 | 1.481 |
|     | H17''....O14'' | 1.634 | 1.639 | 1.485 | 1.495 |
|     | H10'....O8     | 1.839 | 1.848 | 1.729 | 1.705 |
|     | H16....O12'    | 1.867 | 1.872 | 1.763 | 1.749 |
|     | H16''....O10'  | 1.869 | 1.878 | 1.778 | 1.758 |
|     | H15'....O12''  | 1.852 | 1.860 | 1.754 | 1.739 |
| 5   | H15....O14     | 1.640 | 1.644 | 1.486 | 1.495 |
|     | H17'....O14'   | 1.619 | 1.621 | 1.476 | 1.485 |
|     | H15''....O14'' | 1.691 | 1.697 | 1.556 | 1.568 |
|     | H16'....O8     | 1.814 | 1.821 | 1.704 | 1.687 |
|     | H16....O12'    | 1.859 | 1.863 | 1.766 | 1.750 |
|     | H16''....O10'  | 1.848 | 1.857 | 1.754 | 1.734 |
|     | H15'....O10''  | 1.888 | 1.900 | 1.804 | 1.790 |
| 5-y | H15....O14     | 1.642 | 1.646 | 1.491 | 1.506 |
|     | H17'....O14'   | 1.622 | 1.625 | 1.479 | 1.541 |
|     | H15''....O14'' | 1.693 | 1.699 | 1.559 | 1.646 |
|     | H16'....O8     | 1.827 | 1.838 | 1.720 | 2.125 |
|     | H16....O12'    | 1.868 | 1.874 | 1.771 | 1.454 |
|     | H16''....O10'  | 1.855 | 1.868 | 1.765 | 1.780 |
|     | H15'....O10''  | 1.891 | 1.908 | 1.805 | 1.801 |
| 6   | H17....O14     | 1.686 | 1.689 | 1.554 | 1.565 |
|     | H15'....O14'   | 1.617 | 1.619 | 1.471 | 1.480 |

|                                    |                |       |       |       |       |
|------------------------------------|----------------|-------|-------|-------|-------|
|                                    | H15''....O14'' | 1.691 | 1.696 | 1.556 | 1.567 |
|                                    | H15....O10'    | 1.857 | 1.867 | 1.768 | 1.748 |
|                                    | H16'....O10    | 1.887 | 1.899 | 1.800 | 1.788 |
|                                    | H16'....O10''  | 1.852 | 1.866 | 1.766 | 1.751 |
|                                    | H17''....O10'  | 1.841 | 1.847 | 1.747 | 1.732 |
| 6-y                                | H17....O14     | 1.689 | 1.693 | 1.556 | 1.576 |
|                                    | H15'....O14'   | 1.619 | 1.622 | 1.471 | 1.490 |
|                                    | H15''....O14'' | 1.691 | 1.696 | 1.557 | 1.567 |
|                                    | H15....O10'    | 1.863 | 1.875 | 1.776 | 1.756 |
|                                    | H16'....O10    | 1.892 | 1.905 | 1.807 | 1.839 |
|                                    | H16'....O10''  | 1.866 | 1.882 | 1.776 | 1.770 |
|                                    | H17''....O10'  | 1.851 | 1.857 | 1.750 | 1.770 |
| <b>structure T7-ET6,2''</b>        |                |       |       |       |       |
| 1                                  | H15....O14     | 1.614 | 1.610 | 1.467 | 1.476 |
|                                    | H15'....O14'   | 1.616 | 1.618 | 1.472 | 1.480 |
|                                    | H17''....O14'' | 1.615 | 1.625 | 1.459 | 1.469 |
|                                    | H16'....O8     | 1.841 | 1.817 | 1.742 | 1.725 |
|                                    | H16....O12'    | 1.860 | 1.857 | 1.773 | 1.753 |
|                                    | H16''....O10'  | 1.851 | 1.866 | 1.757 | 1.740 |
|                                    | H15'....O12''  | 1.813 | 1.852 | 1.707 | 1.688 |
| 1-y                                | H15....O14     | 1.614 | 1.617 | 1.468 | 1.477 |
|                                    | H15'....O14'   | 1.618 | 1.621 | 1.472 | 1.481 |
|                                    | H17''....O14'' | 1.618 | 1.623 | 1.463 | 1.471 |
|                                    | H16'....O8     | 1.842 | 1.850 | 1.742 | 1.728 |
|                                    | H16....O12'    | 1.873 | 1.882 | 1.784 | 1.764 |
|                                    | H16''....O10'  | 1.863 | 1.868 | 1.762 | 1.747 |
|                                    | H15'....O12''  | 1.835 | 1.844 | 1.725 | 1.699 |
| <b>structure T7-M5,3''-ET6,2''</b> |                |       |       |       |       |
| 1                                  | H15....O14     | 1.656 | 1.663 | 1.487 | 1.498 |
|                                    | H15'....O14'   | 1.615 | 1.618 | 1.469 | 1.477 |
|                                    | H17''....O14'' | 1.654 | 1.662 | 1.478 | 1.490 |
|                                    | H16'....O8     | 1.843 | 1.849 | 1.739 | 1.723 |
|                                    | H16....O12'    | 1.862 | 1.871 | 1.771 | 1.750 |
|                                    | H16''....O10'  | 1.844 | 1.850 | 1.748 | 1.732 |
|                                    | H15'....O12''  | 1.803 | 1.811 | 1.696 | 1.679 |
|                                    |                |       |       |       |       |
| 1-y                                | H15....O14     | 1.659 | 1.666 | 1.486 | 1.498 |
|                                    | H15'....O14'   | 1.617 | 1.620 | 1.469 | 1.478 |
|                                    | H17''....O14'' | 1.658 | 1.667 | 1.482 | 1.492 |
|                                    | H16'....O8     | 1.834 | 1.842 | 1.731 | 1.720 |

|                                      |                |       |       |       |       |
|--------------------------------------|----------------|-------|-------|-------|-------|
|                                      | H16....O12'    | 1.865 | 1.875 | 1.773 | 1.752 |
|                                      | H16''....O10'  | 1.858 | 1.864 | 1.753 | 1.740 |
|                                      | H15'....O12''  | 1.823 | 1.832 | 1.712 | 1.688 |
| <b>structure T7-KT6''-M5,3'',3''</b> |                |       |       |       |       |
| 1                                    | H15....O14     | 1.624 | 1.628 | 1.481 | 1.489 |
|                                      | H15'....O14'   | 1.610 | 1.612 | 1.460 | 1.468 |
|                                      | H15''....O14'' | 1.637 | 1.642 | 1.451 | 1.469 |
|                                      | H17'....O8     | 1.827 | 1.836 | 1.734 | 1.715 |
|                                      | H16....O10'    | 1.829 | 1.840 | 1.742 | 1.720 |
|                                      | H16''....O8'   | 1.844 | 1.848 | 1.720 | 1.699 |
|                                      | H16'....O12''  | 1.713 | 1.717 | 1.587 | 1.571 |
| 1-y                                  | H15....O14     | 1.626 | 1.629 | 1.483 | 1.490 |
|                                      | H15'....O14'   | 1.611 | 1.613 | 1.460 | 1.468 |
|                                      | H15''....O14'' | 1.638 | 1.643 | 1.451 | 1.470 |
|                                      | H17'....O8     | 1.834 | 1.840 | 1.736 | 1.721 |
|                                      | H16....O10'    | 1.851 | 1.860 | 1.755 | 1.730 |
|                                      | H16''....O8'   | 1.844 | 1.849 | 1.723 | 1.706 |
|                                      | H16'....O12''  | 1.723 | 1.730 | 1.599 | 1.573 |
| 2                                    | H15....O14     | 1.617 | 1.620 | 1.468 | 1.474 |
|                                      | H17'....O14'   | 1.614 | 1.638 | 1.469 | 1.477 |
|                                      | H15''....O14'' | 1.637 | 1.643 | 1.449 | 1.466 |
|                                      | H16'....O8     | 1.796 | 1.802 | 1.688 | 1.667 |
|                                      | H16....O12'    | 1.831 | 1.838 | 1.741 | 1.724 |
|                                      | H16''....O10'  | 1.843 | 1.850 | 1.738 | 1.714 |
|                                      | H16'....O12''  | 1.741 | 1.745 | 1.634 | 1.619 |
| 2-y                                  | H15....O14     | 1.617 | 1.624 | 1.473 | 1.477 |
|                                      | H17'....O14'   | 1.614 | 1.619 | 1.470 | 1.479 |
|                                      | H15''....O14'' | 1.637 | 1.642 | 1.449 | 1.465 |
|                                      | H16'....O8     | 1.796 | 1.826 | 1.706 | 1.676 |
|                                      | H16....O12'    | 1.831 | 1.852 | 1.747 | 1.731 |
|                                      | H16''....O10'  | 1.843 | 1.866 | 1.745 | 1.716 |
|                                      | H16'....O12''  | 1.741 | 1.746 | 1.634 | 1.620 |
| 3                                    | H17....O14     | 1.654 | 1.657 | 1.529 | 1.538 |
|                                      | H15'....O14'   | 1.613 | 1.615 | 1.465 | 1.472 |
|                                      | H15''....O14'' | 1.637 | 1.642 | 1.449 | 1.468 |
|                                      | H15....O10'    | 1.827 | 1.840 | 1.739 | 1.715 |
|                                      | H17'....O10    | 1.863 | 1.879 | 1.790 | 1.773 |
|                                      | H16'....O12''  | 1.708 | 1.712 | 1.579 | 1.563 |
|                                      | H16''....O8'   | 1.849 | 1.854 | 1.729 | 1.708 |
| 3-y                                  | H17....O14     | 1.653 | 1.657 | 1.529 | 1.562 |
|                                      | H15'....O14'   | 1.615 | 1.617 | 1.465 | 1.477 |

|     |              |       |       |       |       |
|-----|--------------|-------|-------|-------|-------|
|     | H15"....O14" | 1.638 | 1.644 | 1.449 | 1.468 |
|     | H15....O10'  | 1.872 | 1.878 | 1.739 | 1.751 |
|     | H17'....O10  | 1.882 | 1.892 | 1.790 | 1.841 |
|     | H16'....O12" | 1.722 | 1.727 | 1.579 | 1.568 |
|     | H16"....O8'  | 1.847 | 1.852 | 1.729 | 1.724 |
| 4   | H17....O14   | 1.654 | 1.657 | 1.528 | 1.537 |
|     | H17'....O14' | 1.613 | 1.616 | 1.468 | 1.477 |
|     | H15"....O14" | 1.637 | 1.652 | 1.449 | 1.468 |
|     | H15....O12'  | 1.827 | 1.837 | 1.739 | 1.722 |
|     | H17'....O10  | 1.835 | 1.847 | 1.752 | 1.734 |
|     | H15'....O12" | 1.740 | 1.744 | 1.635 | 1.621 |
|     | H16"....O10' | 1.845 | 1.852 | 1.748 | 1.725 |
| 4-y | H17....O14   | 1.653 | 1.656 | 1.527 | 1.536 |
|     | H17'....O14' | 1.618 | 1.620 | 1.470 | 1.480 |
|     | H15"....O14" | 1.637 | 1.642 | 1.449 | 1.467 |
|     | H15....O12'  | 1.853 | 1.861 | 1.749 | 1.737 |
|     | H17'....O10  | 1.865 | 1.878 | 1.772 | 1.751 |
|     | H15'....O12" | 1.742 | 1.745 | 1.637 | 1.624 |
|     | H16"....O10' | 1.857 | 1.863 | 1.752 | 1.723 |
| 5   | H17....O14   | 1.677 | 1.678 | 1.543 | 1.554 |
|     | H15'....O14' | 1.657 | 1.659 | 1.497 | 1.507 |
|     | H15"....O14" | 1.636 | 1.641 | 1.446 | 1.464 |
|     | H15....O10'  | 1.852 | 1.857 | 1.761 | 1.743 |
|     | H16....O12'  | 1.930 | 1.923 | 1.832 | 1.827 |
|     | H16'....O12" | 1.696 | 1.698 | 1.559 | 1.544 |
|     | H16"....O8'  | 1.868 | 1.872 | 1.759 | 1.738 |
| 5-y | H17....O14   | 1.678 | 1.682 | 1.545 | 1.562 |
|     | H15'....O14' | 1.663 | 1.667 | 1.499 | 1.509 |
|     | H15"....O14" | 1.675 | 1.640 | 1.444 | 1.461 |
|     | H15....O10'  | 1.872 | 1.874 | 1.775 | 1.756 |
|     | H16....O12'  | 1.937 | 1.937 | 1.834 | 1.860 |
|     | H16'....O12" | 1.698 | 1.702 | 1.564 | 1.535 |
|     | H16"....O8'  | 1.872 | 1.877 | 1.762 | 1.745 |
| 6   | H17....O14   | 1.682 | 1.687 | 1.554 | 1.566 |
|     | H15'....O14' | 1.659 | 1.661 | 1.498 | 1.508 |
|     | H15"....O14" | 1.665 | 1.641 | 1.446 | 1.464 |
|     | H15....O12'  | 1.921 | 1.915 | 1.814 | 1.802 |
|     | H16....O10'  | 1.869 | 1.874 | 1.766 | 1.751 |
|     | H16"....O8'  | 1.869 | 1.870 | 1.760 | 1.738 |
|     | H16'....O12" | 1.698 | 1.700 | 1.560 | 1.546 |
| 6-y | H17....O14   | 1.681 | 1.685 | 1.554 | 1.565 |
|     | H15'....O14' | 1.653 | 1.655 | 1.501 | 1.513 |

|     |              |       |       |       |       |
|-----|--------------|-------|-------|-------|-------|
|     | H15"....O14" | 1.634 | 1.639 | 1.443 | 1.462 |
|     | H15....O12'  | 1.943 | 1.935 | 1.810 | 1.811 |
|     | H16....O10'  | 1.898 | 1.903 | 1.771 | 1.753 |
|     | H16"....O8'  | 1.879 | 1.883 | 1.770 | 1.756 |
|     | H16'....O12" | 1.697 | 1.702 | 1.559 | 1.529 |
| 7   | H17....O14   | 1.666 | 1.670 | 1.541 | 1.552 |
|     | H17'....O14' | 1.623 | 1.625 | 1.481 | 1.490 |
|     | H15"....O14" | 1.632 | 1.637 | 1.427 | 1.447 |
|     | H15....O12'  | 1.840 | 1.841 | 1.753 | 1.734 |
|     | H16....O10'  | 1.883 | 1.881 | 1.807 | 1.788 |
|     | H15'....O12" | 1.795 | 1.796 | 1.679 | 1.673 |
|     | H16"....O10' | 1.949 | 1.947 | 1.859 | 1.844 |
| 7-y | H17....O14   | 1.663 | 1.664 | 1.539 | 1.556 |
|     | H17'....O14' | 1.626 | 1.625 | 1.482 | 1.495 |
|     | H15"....O14" | 1.632 | 1.637 | 1.429 | 1.451 |
|     | H15....O12'  | 1.859 | 1.852 | 1.762 | 1.750 |
|     | H16....O10'  | 1.885 | 1.880 | 1.807 | 1.761 |
|     | H15'....O12" | 1.798 | 1.791 | 1.673 | 1.672 |
|     | H16"....O10' | 1.938 | 1.934 | 1.838 | 1.801 |
| 8   | H17....O14   | 1.671 | 1.674 | 1.551 | 1.561 |
|     | H17'....O14' | 1.632 | 1.634 | 1.486 | 1.496 |
|     | H15"....O14" | 1.632 | 1.637 | 1.427 | 1.447 |
|     | H15....O10'  | 1.858 | 1.861 | 1.794 | 1.769 |
|     | H16....O12'  | 1.868 | 1.862 | 1.767 | 1.755 |
|     | H16'....O10" | 1.947 | 1.944 | 1.856 | 1.839 |
|     | H15'....O12" | 1.794 | 1.794 | 1.679 | 1.673 |
| 8-y | H17....O14   | 1.681 | 1.699 | 1.554 | 1.595 |
|     | H17'....O14' | 1.635 | 1.637 | 1.487 | 1.504 |
|     | H15"....O14" | 1.633 | 1.637 | 1.428 | 1.450 |
|     | H15....O10'  | 1.889 | 1.901 | 1.798 | 1.767 |
|     | H16....O12'  | 1.902 | 1.907 | 1.773 | 1.801 |
|     | H16'....O10" | 1.932 | 1.932 | 1.842 | 1.796 |
|     | H15'....O12" | 1.788 | 1.790 | 1.673 | 1.661 |
| 9   | H17....O14   | 1.676 | 1.678 | 1.543 | 1.553 |
|     | H17'....O14' | 1.627 | 1.629 | 1.492 | 1.501 |
|     | H15"....O14" | 1.630 | 1.635 | 1.422 | 1.443 |
|     | H15....O12'  | 1.835 | 1.840 | 1.767 | 1.750 |
|     | H16....O10'  | 1.860 | 1.865 | 1.797 | 1.776 |
|     | H15'....O10" | 1.979 | 1.979 | 1.903 | 1.883 |
|     | H16'....O12" | 1.767 | 1.767 | 1.633 | 1.626 |
| 9-y | H17....O14   | 1.676 | 1.677 | 1.550 | 1.552 |
|     | H17'....O14' | 1.629 | 1.631 | 1.491 | 1.501 |

|                                       |              |       |       |       |       |
|---------------------------------------|--------------|-------|-------|-------|-------|
|                                       | H15"....O14" | 1.634 | 1.636 | 1.417 | 1.441 |
|                                       | H15....O12'  | 1.860 | 1.850 | 1.761 | 1.760 |
|                                       | H16....O10'  | 1.911 | 1.898 | 1.801 | 1.799 |
|                                       | H15'....O10" | 1.968 | 1.961 | 1.894 | 1.902 |
|                                       | H16'....O12" | 1.750 | 1.756 | 1.627 | 1.605 |
| 10                                    | H17....O14   | 1.678 | 1.680 | 1.547 | 1.557 |
|                                       | H17'....O14' | 1.636 | 1.637 | 1.498 | 1.509 |
|                                       | H15"....O14" | 1.630 | 1.635 | 1.422 | 1.443 |
|                                       | H15....O10'  | 1.842 | 1.846 | 1.782 | 1.758 |
|                                       | H16....O12'  | 1.969 | 1.967 | 1.787 | 1.778 |
|                                       | H16'....O12" | 1.763 | 1.762 | 1.631 | 1.621 |
|                                       | H15'....O10" | 1.981 | 1.981 | 1.905 | 1.884 |
| 10-y                                  | H17....O14   | 1.681 | 1.690 | 1.550 | 1.563 |
|                                       | H17'....O14' | 1.641 | 1.645 | 1.499 | 1.521 |
|                                       | H15"....O14" | 1.629 | 1.635 | 1.417 | 1.435 |
|                                       | H15....O10'  | 1.889 | 1.891 | 1.795 | 1.787 |
|                                       | H16....O12'  | 1.915 | 1.912 | 1.791 | 1.841 |
|                                       | H16'....O12" | 1.757 | 1.759 | 1.631 | 1.605 |
|                                       | H15'....O10" | 1.974 | 1.977 | 1.897 | 1.933 |
| <b>structure T7-KT2,6"-M5,5,3",3"</b> |              |       |       |       |       |
| 1                                     | H17....O14   | 1.630 | 1.633 | 1.450 | 1.466 |
|                                       | H15'....O14' | 1.610 | 1.622 | 1.460 | 1.468 |
|                                       | H15"....O14" | 1.637 | 1.643 | 1.451 | 1.469 |
|                                       | H17'....O8   | 1.743 | 1.746 | 1.637 | 1.621 |
|                                       | H16....O10'  | 1.831 | 1.836 | 1.721 | 1.697 |
|                                       | H16"....O8'  | 1.840 | 1.845 | 1.717 | 1.696 |
|                                       | H16'....O12" | 1.708 | 1.711 | 1.581 | 1.563 |
| 1-y                                   | H17....O14   | 1.630 | 1.633 | 1.449 | 1.465 |
|                                       | H15'....O14' | 1.612 | 1.613 | 1.460 | 1.469 |
|                                       | H15"....O14" | 1.639 | 1.644 | 1.452 | 1.470 |
|                                       | H17'....O8   | 1.744 | 1.746 | 1.636 | 1.623 |
|                                       | H16....O10'  | 1.853 | 1.858 | 1.733 | 1.701 |
|                                       | H16"....O8'  | 1.844 | 1.848 | 1.722 | 1.704 |
|                                       | H16'....O12" | 1.723 | 1.728 | 1.597 | 1.567 |
| <b>structure T8-KT6"-M5,3",3"</b>     |              |       |       |       |       |
| 1                                     | H15....O14   | 1.625 | 1.628 | 1.481 | 1.488 |
|                                       | H15'....O14' | 1.610 | 1.612 | 1.461 | 1.468 |
|                                       | H15"....O14" | 1.631 | 1.635 | 1.451 | 1.467 |
|                                       | H17'....O8   | 1.827 | 1.836 | 1.735 | 1.715 |

|     |                |       |       |       |       |
|-----|----------------|-------|-------|-------|-------|
|     | H16....O10'    | 1.829 | 1.839 | 1.741 | 1.719 |
|     | H16''....O8'   | 1.843 | 1.848 | 1.721 | 1.700 |
|     | H16'....O12''  | 1.711 | 1.715 | 1.585 | 1.568 |
| 1-y | H15....O14     | 1.626 | 1.630 | 1.483 | 1.491 |
|     | H15'....O14'   | 1.611 | 1.613 | 1.460 | 1.469 |
|     | H15''....O14'' | 1.632 | 1.635 | 1.452 | 1.470 |
|     | H17'....O8     | 1.835 | 1.840 | 1.736 | 1.723 |
|     | H16....O10'    | 1.851 | 1.859 | 1.754 | 1.726 |
|     | H16''....O8'   | 1.847 | 1.850 | 1.724 | 1.709 |
|     | H16'....O12''  | 1.722 | 1.728 | 1.597 | 1.567 |
|     |                |       |       |       |       |
| 2   | H15....O14     | 1.617 | 1.620 | 1.468 | 1.474 |
|     | H17'....O14'   | 1.614 | 1.616 | 1.469 | 1.477 |
|     | H15''....O14'' | 1.631 | 1.635 | 1.451 | 1.468 |
|     | H16'....O8     | 1.796 | 1.803 | 1.688 | 1.667 |
|     | H16....O12'    | 1.831 | 1.838 | 1.741 | 1.724 |
|     | H16''....O10'  | 1.842 | 1.849 | 1.738 | 1.714 |
|     | H16'....O12''  | 1.739 | 1.742 | 1.635 | 1.620 |
| 2-y | H15....O14     | 1.621 | 1.621 | 1.473 | 1.477 |
|     | H17'....O14'   | 1.617 | 1.619 | 1.470 | 1.479 |
|     | H15''....O14'' | 1.631 | 1.634 | 1.451 | 1.467 |
|     | H16'....O8     | 1.818 | 1.826 | 1.706 | 1.675 |
|     | H16....O12'    | 1.845 | 1.852 | 1.747 | 1.731 |
|     | H16''....O10'  | 1.860 | 1.866 | 1.745 | 1.715 |
|     | H16'....O12''  | 1.743 | 1.744 | 1.635 | 1.621 |
| 3   | H17....O14     | 1.654 | 1.658 | 1.529 | 1.538 |
|     | H15'....O14'   | 1.613 | 1.615 | 1.466 | 1.473 |
|     | H15''....O14'' | 1.631 | 1.634 | 1.450 | 1.466 |
|     | H15....O10'    | 1.827 | 1.839 | 1.737 | 1.714 |
|     | H17'....O10    | 1.863 | 1.879 | 1.791 | 1.774 |
|     | H16'....O12''  | 1.706 | 1.710 | 1.576 | 1.559 |
|     | H16''....O8'   | 1.849 | 1.854 | 1.730 | 1.705 |
| 3-y | H17....O14     | 1.655 | 1.659 | 1.529 | 1.547 |
|     | H15'....O14'   | 1.615 | 1.617 | 1.466 | 1.476 |
|     | H15''....O14'' | 1.634 | 1.638 | 1.452 | 1.466 |
|     | H15....O10'    | 1.876 | 1.879 | 1.766 | 1.737 |
|     | H17'....O10    | 1.887 | 1.894 | 1.795 | 1.812 |
|     | H16'....O12''  | 1.722 | 1.726 | 1.593 | 1.566 |
|     | H16''....O8'   | 1.846 | 1.851 | 1.732 | 1.718 |
| 4   | H17....O14     | 1.654 | 1.657 | 1.528 | 1.537 |
|     | H17'....O14'   | 1.613 | 1.616 | 1.468 | 1.477 |
|     | H15''....O14'' | 1.631 | 1.634 | 1.450 | 1.466 |
|     | H15....O12'    | 1.827 | 1.836 | 1.738 | 1.722 |

|     |              |       |       |       |       |
|-----|--------------|-------|-------|-------|-------|
|     | H17'....O10  | 1.835 | 1.848 | 1.753 | 1.735 |
|     | H15'....O12" | 1.738 | 1.742 | 1.633 | 1.619 |
|     | H16"....O10' | 1.844 | 1.852 | 1.749 | 1.726 |
| 4-y | H17....O14   | 1.653 | 1.656 | 1.527 | 1.536 |
|     | H17'....O14' | 1.618 | 1.620 | 1.470 | 1.480 |
|     | H15"....O14" | 1.631 | 1.634 | 1.449 | 1.466 |
|     | H15....O12'  | 1.852 | 1.860 | 1.748 | 1.737 |
|     | H17'....O10  | 1.864 | 1.878 | 1.773 | 1.751 |
|     | H15'....O12" | 1.740 | 1.743 | 1.634 | 1.621 |
|     | H16"....O10' | 1.856 | 1.862 | 1.753 | 1.724 |
|     |              |       |       |       |       |
| 5   | H17....O14   | 1.677 | 1.679 | 1.543 | 1.554 |
|     | H15'....O14' | 1.655 | 1.660 | 1.497 | 1.507 |
|     | H15"....O14" | 1.629 | 1.633 | 1.446 | 1.463 |
|     | H15....O10'  | 1.844 | 1.848 | 1.763 | 1.743 |
|     | H16....O12'  | 1.910 | 1.912 | 1.832 | 1.828 |
|     | H16'....O12" | 1.695 | 1.697 | 1.557 | 1.541 |
|     | H16"....O8'  | 1.869 | 1.873 | 1.759 | 1.738 |
|     |              |       |       |       |       |
| 5-y | H17....O14   | 1.679 | 1.684 | 1.545 | 1.558 |
|     | H15'....O14' | 1.663 | 1.667 | 1.499 | 1.510 |
|     | H15"....O14" | 1.628 | 1.631 | 1.444 | 1.460 |
|     | H15....O10'  | 1.874 | 1.874 | 1.776 | 1.753 |
|     | H16....O12'  | 1.940 | 1.939 | 1.834 | 1.859 |
|     | H16'....O12" | 1.697 | 1.699 | 1.562 | 1.526 |
|     | H16"....O8'  | 1.872 | 1.878 | 1.762 | 1.752 |
|     |              |       |       |       |       |
| 6   | H17....O14   | 1.678 | 1.680 | 1.554 | 1.566 |
|     | H15'....O14' | 1.657 | 1.664 | 1.499 | 1.509 |
|     | H15"....O14" | 1.629 | 1.633 | 1.446 | 1.462 |
|     | H15....O12'  | 1.863 | 1.871 | 1.814 | 1.802 |
|     | H16....O10'  | 1.844 | 1.848 | 1.766 | 1.751 |
|     | H16"....O8'  | 1.872 | 1.876 | 1.761 | 1.739 |
|     | H16'....O12" | 1.696 | 1.699 | 1.557 | 1.543 |
|     |              |       |       |       |       |
| 6-y | H17....O14   | 1.679 | 1.683 | 1.554 | 1.566 |
|     | H15'....O14' | 1.665 | 1.672 | 1.501 | 1.515 |
|     | H15"....O14" | 1.629 | 1.632 | 1.443 | 1.466 |
|     | H15....O12'  | 1.886 | 1.889 | 1.811 | 1.844 |
|     | H16....O10'  | 1.881 | 1.881 | 1.771 | 1.766 |
|     | H16"....O8'  | 1.878 | 1.879 | 1.770 | 1.771 |
|     | H16'....O12" | 1.697 | 1.703 | 1.556 | 1.518 |
|     |              |       |       |       |       |
| 7   | H17....O14   | 1.667 | 1.670 | 1.541 | 1.552 |
|     | H17'....O14' | 1.623 | 1.625 | 1.481 | 1.490 |
|     | H15"....O14" | 1.626 | 1.629 | 1.427 | 1.445 |
|     | H15....O12'  | 1.839 | 1.841 | 1.752 | 1.734 |



|     |              |       |       |       |       |
|-----|--------------|-------|-------|-------|-------|
|     | H16....O10'  | 1.883 | 1.881 | 1.807 | 1.789 |
|     | H15'....O12" | 1.794 | 1.794 | 1.677 | 1.670 |
|     | H16"....O10' | 1.948 | 1.946 | 1.857 | 1.842 |
| 7-y | H17....O14   | 1.663 | 1.664 | 1.539 | 1.556 |
|     | H17'....O14' | 1.625 | 1.625 | 1.482 | 1.495 |
|     | H15"....O14" | 1.626 | 1.629 | 1.429 | 1.449 |
|     | H15....O12'  | 1.859 | 1.852 | 1.762 | 1.750 |
|     | H16....O10'  | 1.884 | 1.880 | 1.807 | 1.761 |
|     | H15'....O12" | 1.797 | 1.790 | 1.671 | 1.670 |
|     | H16"....O10' | 1.938 | 1.933 | 1.836 | 1.801 |
|     |              |       |       |       |       |
| 8   | H17....O14   | 1.671 | 1.674 | 1.550 | 1.561 |
|     | H17'....O14' | 1.632 | 1.634 | 1.486 | 1.497 |
|     | H15"....O14" | 1.625 | 1.629 | 1.427 | 1.445 |
|     | H15....O10'  | 1.858 | 1.860 | 1.794 | 1.768 |
|     | H16....O12'  | 1.868 | 1.862 | 1.767 | 1.755 |
|     | H16'....O10" | 1.946 | 1.943 | 1.854 | 1.837 |
|     | H15'....O12" | 1.793 | 1.792 | 1.677 | 1.670 |
|     |              |       |       |       |       |
| 8-y | H17....O14   | 1.681 | 1.699 | 1.553 | 1.595 |
|     | H17'....O14' | 1.635 | 1.636 | 1.487 | 1.504 |
|     | H15"....O14" | 1.626 | 1.629 | 1.428 | 1.449 |
|     | H15....O10'  | 1.888 | 1.900 | 1.798 | 1.767 |
|     | H16....O12'  | 1.901 | 1.906 | 1.773 | 1.802 |
|     | H16'....O10" | 1.931 | 1.932 | 1.842 | 1.795 |
|     | H15'....O12" | 1.787 | 1.788 | 1.670 | 1.658 |
|     |              |       |       |       |       |
| 9   | H17....O14   | 1.666 | 1.669 | 1.543 | 1.553 |
|     | H17'....O14' | 1.628 | 1.630 | 1.493 | 1.501 |
|     | H15"....O14" | 1.624 | 1.627 | 1.422 | 1.441 |
|     | H15....O12'  | 1.842 | 1.846 | 1.767 | 1.749 |
|     | H16....O10'  | 1.870 | 1.871 | 1.796 | 1.775 |
|     | H15'....O10" | 1.978 | 1.978 | 1.902 | 1.883 |
|     | H16'....O12" | 1.767 | 1.766 | 1.631 | 1.624 |
|     |              |       |       |       |       |
| 9-y | H17....O14   | 1.662 | 1.676 | 1.550 | 1.551 |
|     | H17'....O14' | 1.636 | 1.638 | 1.491 | 1.501 |
|     | H15"....O14" | 1.623 | 1.627 | 1.417 | 1.439 |
|     | H15....O12'  | 1.872 | 1.874 | 1.761 | 1.759 |
|     | H16....O10'  | 1.895 | 1.892 | 1.801 | 1.797 |
|     | H15'....O10" | 1.969 | 1.973 | 1.894 | 1.901 |
|     | H16'....O12" | 1.753 | 1.754 | 1.627 | 1.602 |
|     |              |       |       |       |       |
| 10  | H17....O14   | 1.668 | 1.670 | 1.547 | 1.557 |
|     | H17'....O14' | 1.636 | 1.638 | 1.498 | 1.509 |
|     | H15"....O14" | 1.624 | 1.627 | 1.422 | 1.440 |
|     | H15....O10'  | 1.847 | 1.851 | 1.781 | 1.757 |

|                                  |                |       |       |       |       |
|----------------------------------|----------------|-------|-------|-------|-------|
|                                  | H16....O12'    | 1.875 | 1.873 | 1.787 | 1.778 |
|                                  | H16'....O12''  | 1.763 | 1.760 | 1.628 | 1.617 |
|                                  | H15'....O10''  | 1.979 | 1.979 | 1.903 | 1.883 |
| 10-y                             | H17....O14     | 1.688 | 1.685 | 1.551 | 1.567 |
|                                  | H17'....O14'   | 1.643 | 1.644 | 1.500 | 1.521 |
|                                  | H15''....O14'' | 1.633 | 1.628 | 1.416 | 1.431 |
|                                  | H15....O10'    | 1.897 | 1.894 | 1.795 | 1.772 |
|                                  | H16....O12'    | 1.944 | 1.918 | 1.794 | 1.841 |
|                                  | H16'....O12''  | 1.749 | 1.757 | 1.630 | 1.612 |
|                                  | H15'....O10''  | 2.005 | 1.983 | 1.894 | 1.947 |
| <b>structure T8-KT2-M5,5,3''</b> |                |       |       |       |       |
| 1                                | H17....O14     | 1.630 | 1.634 | 1.449 | 1.466 |
|                                  | H17'....O14'   | 1.610 | 1.614 | 1.460 | 1.468 |
|                                  | H17''....O14'' | 1.626 | 1.630 | 1.484 | 1.490 |
|                                  | H16'....O8     | 1.711 | 1.715 | 1.584 | 1.567 |
|                                  | H16....O12'    | 1.843 | 1.848 | 1.721 | 1.701 |
|                                  | H16''....O10'  | 1.829 | 1.838 | 1.741 | 1.718 |
|                                  | H16'....O12''  | 1.828 | 1.835 | 1.736 | 1.716 |
| 1-y                              | H17....O14     | 1.631 | 1.634 | 1.450 | 1.480 |
|                                  | H17'....O14'   | 1.611 | 1.613 | 1.460 | 1.473 |
|                                  | H17''....O14'' | 1.627 | 1.631 | 1.485 | 1.494 |
|                                  | H16'....O8     | 1.721 | 1.727 | 1.596 | 1.563 |
|                                  | H16....O12'    | 1.848 | 1.849 | 1.724 | 1.729 |
|                                  | H16''....O10'  | 1.850 | 1.860 | 1.754 | 1.724 |
|                                  | H16'....O12''  | 1.835 | 1.841 | 1.738 | 1.737 |
| 2                                | H17....O14     | 1.630 | 1.633 | 1.449 | 1.466 |
|                                  | H15'....O14'   | 1.614 | 1.616 | 1.469 | 1.478 |
|                                  | H17''....O14'' | 1.618 | 1.622 | 1.470 | 1.476 |
|                                  | H17'....O8     | 1.739 | 1.742 | 1.634 | 1.618 |
|                                  | H16....O10'    | 1.842 | 1.849 | 1.738 | 1.715 |
|                                  | H16''....O8'   | 1.831 | 1.838 | 1.741 | 1.724 |
|                                  | H16'....O12''  | 1.797 | 1.803 | 1.688 | 1.668 |
| 2-y                              | H17....O14     | 1.630 | 1.633 | 1.449 | 1.465 |
|                                  | H15'....O14'   | 1.617 | 1.619 | 1.469 | 1.479 |
|                                  | H17''....O14'' | 1.622 | 1.626 | 1.474 | 1.479 |
|                                  | H17'....O8     | 1.742 | 1.744 | 1.633 | 1.619 |
|                                  | H16....O10'    | 1.860 | 1.866 | 1.746 | 1.716 |
|                                  | H16''....O8'   | 1.845 | 1.851 | 1.746 | 1.730 |
|                                  | H16'....O12''  | 1.818 | 1.827 | 1.707 | 1.677 |
| 3                                | H17....O14     | 1.618 | 1.623 | 1.426 | 1.447 |
|                                  | H17'....O14'   | 1.613 | 1.615 | 1.465 | 1.472 |

|     |              |       |       |       |       |
|-----|--------------|-------|-------|-------|-------|
|     | H15"....O14" | 1.655 | 1.658 | 1.530 | 1.539 |
|     | H16'....O8   | 1.706 | 1.710 | 1.575 | 1.556 |
|     | H15....O12'  | 1.846 | 1.853 | 1.727 | 1.708 |
|     | H17"....O10' | 1.827 | 1.839 | 1.738 | 1.714 |
|     | H15'....O10" | 1.863 | 1.878 | 1.790 | 1.772 |
| 3-y | H17....O14   | 1.618 | 1.627 | 1.449 | 1.470 |
|     | H17'....O14' | 1.614 | 1.616 | 1.466 | 1.481 |
|     | H15"....O14" | 1.656 | 1.660 | 1.532 | 1.556 |
|     | H16'....O8   | 1.718 | 1.720 | 1.589 | 1.563 |
|     | H15....O12'  | 1.848 | 1.852 | 1.733 | 1.737 |
|     | H17"....O10' | 1.854 | 1.862 | 1.758 | 1.746 |
|     | H15'....O10" | 1.877 | 1.887 | 1.796 | 1.843 |
| 4   | H17....O14   | 1.630 | 1.633 | 1.447 | 1.464 |
|     | H15'....O14' | 1.613 | 1.616 | 1.467 | 1.477 |
|     | H15"....O14" | 1.655 | 1.658 | 1.529 | 1.537 |
|     | H17'....O8   | 1.738 | 1.741 | 1.633 | 1.618 |
|     | H16....O10'  | 1.844 | 1.852 | 1.749 | 1.726 |
|     | H17"....O8'  | 1.827 | 1.836 | 1.738 | 1.722 |
|     | H16'....O10" | 1.835 | 1.848 | 1.753 | 1.735 |
| 4-y | H17....O14   | 1.630 | 1.633 | 1.447 | 1.464 |
|     | H15'....O14' | 1.617 | 1.620 | 1.470 | 1.480 |
|     | H15"....O14" | 1.654 | 1.657 | 1.529 | 1.538 |
|     | H17'....O8   | 1.740 | 1.742 | 1.634 | 1.620 |
|     | H16....O10'  | 1.856 | 1.863 | 1.753 | 1.725 |
|     | H17"....O8'  | 1.852 | 1.860 | 1.748 | 1.737 |
|     | H16'....O10" | 1.865 | 1.879 | 1.773 | 1.751 |
| 5   | H17....O14   | 1.628 | 1.632 | 1.444 | 1.461 |
|     | H17'....O14' | 1.657 | 1.660 | 1.497 | 1.507 |
|     | H15"....O14" | 1.678 | 1.680 | 1.544 | 1.555 |
|     | H16'....O8   | 1.694 | 1.695 | 1.556 | 1.540 |
|     | H16....O12'  | 1.867 | 1.872 | 1.759 | 1.739 |
|     | H17"....O10' | 1.852 | 1.856 | 1.762 | 1.743 |
|     | H16"....O8'  | 1.930 | 1.923 | 1.832 | 1.828 |
| 5-y | H17....O14   | 1.629 | 1.628 | 1.444 | 1.458 |
|     | H17'....O14' | 1.664 | 1.667 | 1.499 | 1.510 |
|     | H15"....O14" | 1.677 | 1.695 | 1.545 | 1.560 |
|     | H16'....O8   | 1.701 | 1.703 | 1.564 | 1.533 |
|     | H16....O12'  | 1.868 | 1.875 | 1.763 | 1.747 |
|     | H17"....O10' | 1.866 | 1.885 | 1.773 | 1.758 |
|     | H16"....O8'  | 1.889 | 1.948 | 1.825 | 1.839 |
| 6   | H17....O14   | 1.628 | 1.631 | 1.443 | 1.460 |
|     | H17'....O14' | 1.667 | 1.665 | 1.499 | 1.509 |

|     |              |       |       |       |       |
|-----|--------------|-------|-------|-------|-------|
|     | H15"....O14" | 1.679 | 1.681 | 1.555 | 1.566 |
|     | H15....O12'  | 1.696 | 1.700 | 1.556 | 1.541 |
|     | H16....O10'  | 1.872 | 1.876 | 1.761 | 1.739 |
|     | H16"....O8'  | 1.847 | 1.853 | 1.765 | 1.750 |
|     | H16'....O12" | 1.865 | 1.875 | 1.813 | 1.803 |
| 6-y | H17....O14   | 1.629 | 1.630 | 1.441 | 1.467 |
|     | H17'....O14' | 1.666 | 1.672 | 1.501 | 1.518 |
|     | H15"....O14" | 1.680 | 1.680 | 1.555 | 1.557 |
|     | H17'....O8   | 1.696 | 1.702 | 1.556 | 1.527 |
|     | H16....O12'  | 1.881 | 1.883 | 1.771 | 1.782 |
|     | H16"....O10' | 1.880 | 1.882 | 1.769 | 1.781 |
|     | H17"....O8'  | 1.886 | 1.890 | 1.803 | 1.799 |
| 7   | H17....O14   | 1.624 | 1.627 | 1.424 | 1.443 |
|     | H15'....O14' | 1.623 | 1.624 | 1.481 | 1.490 |
|     | H15"....O14" | 1.677 | 1.679 | 1.543 | 1.552 |
|     | H17'....O8   | 1.794 | 1.794 | 1.676 | 1.667 |
|     | H16'....O10  | 1.948 | 1.946 | 1.856 | 1.844 |
|     | H17"....O8'  | 1.835 | 1.837 | 1.752 | 1.734 |
|     | H16"....O10' | 1.879 | 1.877 | 1.808 | 1.789 |
| 7-y | H17....O14   | 1.625 | 1.627 | 1.426 | 1.447 |
|     | H15'....O14' | 1.625 | 1.624 | 1.482 | 1.495 |
|     | H15"....O14" | 1.676 | 1.677 | 1.549 | 1.557 |
|     | H17'....O8   | 1.797 | 1.790 | 1.670 | 1.669 |
|     | H16'....O10  | 1.938 | 1.934 | 1.835 | 1.802 |
|     | H17"....O8'  | 1.855 | 1.847 | 1.757 | 1.750 |
|     | H16"....O10' | 1.883 | 1.877 | 1.802 | 1.760 |
| 8   | H17....O14   | 1.624 | 1.626 | 1.424 | 1.443 |
|     | H15'....O14' | 1.632 | 1.634 | 1.486 | 1.496 |
|     | H15"....O14" | 1.682 | 1.684 | 1.550 | 1.561 |
|     | H17'....O8   | 1.792 | 1.791 | 1.675 | 1.668 |
|     | H16'....O10  | 1.947 | 1.944 | 1.853 | 1.839 |
|     | H17"....O8'  | 1.865 | 1.858 | 1.766 | 1.755 |
|     | H16"....O10' | 1.856 | 1.858 | 1.794 | 1.770 |
| 8-y | H17....O14   | 1.625 | 1.627 | 1.425 | 1.445 |
|     | H15'....O14' | 1.635 | 1.637 | 1.487 | 1.497 |
|     | H15"....O14" | 1.690 | 1.702 | 1.555 | 1.570 |
|     | H17'....O8   | 1.786 | 1.788 | 1.670 | 1.668 |
|     | H16'....O10  | 1.932 | 1.933 | 1.842 | 1.823 |
|     | H17"....O8'  | 1.899 | 1.902 | 1.774 | 1.762 |
|     | H16"....O10' | 1.886 | 1.897 | 1.798 | 1.763 |
| 9   | H17....O14   | 1.622 | 1.625 | 1.419 | 1.438 |
|     | H17'....O14' | 1.627 | 1.629 | 1.499 | 1.501 |

|                                       |              |       |       |       |       |
|---------------------------------------|--------------|-------|-------|-------|-------|
|                                       | H15"....O14" | 1.677 | 1.679 | 1.544 | 1.554 |
|                                       | H16'....O8   | 1.766 | 1.766 | 1.630 | 1.621 |
|                                       | H17'....O10  | 1.978 | 1.978 | 1.902 | 1.883 |
|                                       | H16"....O10' | 1.859 | 1.865 | 1.796 | 1.774 |
|                                       | H17"....O8'  | 1.835 | 1.840 | 1.767 | 1.750 |
| 9-y                                   | H17....O14   | 1.622 | 1.624 | 1.413 | 1.439 |
|                                       | H17'....O14' | 1.629 | 1.631 | 1.491 | 1.500 |
|                                       | H15"....O14" | 1.677 | 1.678 | 1.551 | 1.551 |
|                                       | H16'....O8   | 1.748 | 1.753 | 1.624 | 1.604 |
|                                       | H17'....O10  | 1.852 | 1.951 | 1.890 | 1.894 |
|                                       | H16"....O10' | 1.915 | 1.902 | 1.801 | 1.805 |
|                                       | H17"....O8'  | 1.860 | 1.850 | 1.760 | 1.756 |
| 10                                    | H17....O14   | 1.612 | 1.620 | 1.392 | 1.423 |
|                                       | H15'....O14' | 1.636 | 1.638 | 1.498 | 1.509 |
|                                       | H15"....O14" | 1.679 | 1.681 | 1.548 | 1.558 |
|                                       | H16'....O8   | 1.763 | 1.762 | 1.627 | 1.617 |
|                                       | H17'....O10  | 1.981 | 1.982 | 1.901 | 1.894 |
|                                       | H17"....O10' | 1.842 | 1.846 | 1.781 | 1.758 |
|                                       | H16"....O8'  | 1.869 | 1.867 | 1.787 | 1.778 |
| 10-y                                  | H17....O14   | 1.608 | 1.612 | 1.387 | 1.399 |
|                                       | H15'....O14' | 1.642 | 1.645 | 1.498 | 1.526 |
|                                       | H15"....O14" | 1.682 | 1.690 | 1.551 | 1.569 |
|                                       | H16'....O8   | 1.758 | 1.757 | 1.627 | 1.612 |
|                                       | H17'....O10  | 1.972 | 1.976 | 1.892 | 1.949 |
|                                       | H17"....O10' | 1.888 | 1.891 | 1.792 | 1.811 |
|                                       | H16"....O8'  | 1.914 | 1.913 | 1.787 | 1.880 |
| <b>structure T8-KT2,6"-M5,5,3",3"</b> |              |       |       |       |       |
| 1                                     | H17....O14   | 1.630 | 1.633 | 1.449 | 1.466 |
|                                       | H15'....O14' | 1.610 | 1.612 | 1.461 | 1.468 |
|                                       | H15"....O14" | 1.631 | 1.635 | 1.451 | 1.467 |
|                                       | H17'....O8   | 1.743 | 1.743 | 1.637 | 1.621 |
|                                       | H16....O10'  | 1.830 | 1.835 | 1.720 | 1.696 |
|                                       | H16"....O8'  | 1.840 | 1.844 | 1.717 | 1.697 |
|                                       | H16'....O12" | 1.707 | 1.709 | 1.578 | 1.560 |
| 1-y                                   | H17....O14   | 1.630 | 1.633 | 1.449 | 1.465 |
|                                       | H15'....O14' | 1.612 | 1.613 | 1.461 | 1.471 |
|                                       | H15"....O14" | 1.633 | 1.636 | 1.452 | 1.475 |
|                                       | H17'....O8   | 1.745 | 1.746 | 1.637 | 1.626 |
|                                       | H16....O10'  | 1.853 | 1.857 | 1.731 | 1.692 |
|                                       | H16"....O8'  | 1.844 | 1.848 | 1.723 | 1.714 |
|                                       | H16'....O12" | 1.721 | 1.725 | 1.593 | 1.556 |

| structure T9 |                |       |       |       |       |
|--------------|----------------|-------|-------|-------|-------|
| 1            | H15....O14     | 1.619 | 1.622 | 1.470 | 1.477 |
|              | H17'....O14'   | 1.615 | 1.618 | 1.470 | 1.479 |
|              | H17''....O14'' | 1.625 | 1.628 | 1.480 | 1.488 |
|              | H16'....O8     | 1.813 | 1.820 | 1.708 | 1.688 |
|              | H16....O12'    | 1.849 | 1.853 | 1.754 | 1.738 |
|              | H16''....O10'  | 1.856 | 1.864 | 1.769 | 1.749 |
|              | H15'....O12''  | 1.845 | 1.852 | 1.748 | 1.730 |
| 1-y          | H15....O14     | 1.623 | 1.625 | 1.474 | 1.480 |
|              | H17'....O14'   | 1.618 | 1.620 | 1.471 | 1.480 |
|              | H17''....O14'' | 1.626 | 1.629 | 1.481 | 1.489 |
|              | H16'....O8     | 1.836 | 1.844 | 1.725 | 1.699 |
|              | H16....O12'    | 1.861 | 1.866 | 1.760 | 1.745 |
|              | H16''....O10'  | 1.869 | 1.878 | 1.779 | 1.760 |
|              | H15'....O12''  | 1.846 | 1.854 | 1.748 | 1.733 |
| 2            | H15....O14     | 1.618 | 1.620 | 1.466 | 1.473 |
|              | H17'....O14'   | 1.617 | 1.619 | 1.475 | 1.484 |
|              | H15''....O14'' | 1.684 | 1.687 | 1.553 | 1.562 |
|              | H16'....O8     | 1.810 | 1.817 | 1.699 | 1.680 |
|              | H16....O12'    | 1.855 | 1.859 | 1.764 | 1.748 |
|              | H17''....O10'  | 1.849 | 1.859 | 1.755 | 1.733 |
|              | H15'....O10''  | 1.886 | 1.898 | 1.802 | 1.788 |
| 2-y          | H15....O14     | 1.620 | 1.622 | 1.469 | 1.472 |
|              | H17'....O14'   | 1.621 | 1.624 | 1.474 | 1.484 |
|              | H15''....O14'' | 1.686 | 1.692 | 1.553 | 1.568 |
|              | H16'....O8     | 1.830 | 1.839 | 1.715 | 1.658 |
|              | H16....O12'    | 1.867 | 1.873 | 1.764 | 1.748 |
|              | H17''....O10'  | 1.872 | 1.883 | 1.764 | 1.693 |
|              | H15'....O10''  | 1.899 | 1.914 | 1.799 | 1.782 |
| 3            | H15....O14     | 1.624 | 1.627 | 1.478 | 1.486 |
|              | H15'....O14'   | 1.614 | 1.617 | 1.468 | 1.477 |
|              | H15''....O14'' | 1.683 | 1.687 | 1.551 | 1.561 |
|              | H17'....O8     | 1.844 | 1.851 | 1.744 | 1.727 |
|              | H16....O10'    | 1.861 | 1.869 | 1.778 | 1.759 |
|              | H17''....O8'   | 1.834 | 1.841 | 1.739 | 1.723 |
|              | H16'....O10''  | 1.851 | 1.865 | 1.768 | 1.754 |
| 3-y          | H15....O14     | 1.624 | 1.627 | 1.478 | 1.487 |
|              | H15'....O14'   | 1.617 | 1.620 | 1.468 | 1.477 |
|              | H15''....O14'' | 1.683 | 1.686 | 1.551 | 1.562 |
|              | H17'....O8     | 1.842 | 1.849 | 1.745 | 1.729 |
|              | H16....O10'    | 1.864 | 1.873 | 1.780 | 1.762 |

|     |                |       |       |       |       |
|-----|----------------|-------|-------|-------|-------|
|     | H17''....O8'   | 1.846 | 1.853 | 1.744 | 1.729 |
|     | H16'....O10''  | 1.869 | 1.884 | 1.779 | 1.760 |
| 4   | H15....O14     | 1.642 | 1.647 | 1.489 | 1.498 |
|     | H17'....O14'   | 1.616 | 1.619 | 1.472 | 1.480 |
|     | H17''....O14'' | 1.625 | 1.628 | 1.481 | 1.488 |
|     | H10'....O8     | 1.817 | 1.825 | 1.713 | 1.695 |
|     | H16....O12'    | 1.852 | 1.857 | 1.757 | 1.741 |
|     | H16''....O10'  | 1.856 | 1.865 | 1.769 | 1.749 |
|     | H15'....O12''  | 1.846 | 1.854 | 1.749 | 1.731 |
|     |                |       |       |       |       |
| 4-y | H15....O14     | 1.646 | 1.652 | 1.492 | 1.501 |
|     | H17'....O14'   | 1.619 | 1.622 | 1.472 | 1.481 |
|     | H17''....O14'' | 1.626 | 1.629 | 1.482 | 1.490 |
|     | H10'....O8     | 1.840 | 1.849 | 1.730 | 1.706 |
|     | H16....O12'    | 1.867 | 1.872 | 1.763 | 1.749 |
|     | H16''....O10'  | 1.870 | 1.879 | 1.779 | 1.760 |
|     | H15'....O12''  | 1.849 | 1.857 | 1.750 | 1.735 |
|     |                |       |       |       |       |
| 5   | H15....O14     | 1.640 | 1.645 | 1.486 | 1.495 |
|     | H17'....O14'   | 1.619 | 1.621 | 1.476 | 1.485 |
|     | H15''....O14'' | 1.684 | 1.688 | 1.552 | 1.563 |
|     | H16'....O8     | 1.814 | 1.823 | 1.705 | 1.687 |
|     | H16....O12'    | 1.859 | 1.863 | 1.767 | 1.751 |
|     | H16''....O10'  | 1.849 | 1.860 | 1.755 | 1.734 |
|     | H15'....O10''  | 1.887 | 1.900 | 1.802 | 1.789 |
|     |                |       |       |       |       |
| 5-y | H15....O14     | 1.637 | 1.640 | 1.488 | 1.499 |
|     | H17'....O14'   | 1.620 | 1.626 | 1.476 | 1.489 |
|     | H15''....O14'' | 1.688 | 1.701 | 1.554 | 1.593 |
|     | H16'....O8     | 1.819 | 1.841 | 1.720 | 1.694 |
|     | H16....O12'    | 1.862 | 1.882 | 1.768 | 1.768 |
|     | H17''....O10'  | 1.830 | 1.877 | 1.764 | 1.744 |
|     | H15'....O10''  | 1.876 | 1.921 | 1.802 | 1.851 |
|     |                |       |       |       |       |
| 6   | H17....O14     | 1.686 | 1.689 | 1.554 | 1.565 |
|     | H15'....O14'   | 1.617 | 1.620 | 1.472 | 1.481 |
|     | H15''....O14'' | 1.683 | 1.687 | 1.551 | 1.562 |
|     | H15....O10'    | 1.856 | 1.866 | 1.767 | 1.747 |
|     | H16'....O10    | 1.887 | 1.899 | 1.800 | 1.788 |
|     | H16'....O10''  | 1.851 | 1.864 | 1.763 | 1.749 |
|     | H17''....O10'  | 1.842 | 1.848 | 1.748 | 1.732 |
|     |                |       |       |       |       |
| 6-y | H17....O14     | 1.689 | 1.693 | 1.556 | 1.576 |
|     | H15'....O14'   | 1.620 | 1.623 | 1.472 | 1.491 |
|     | H15''....O14'' | 1.684 | 1.687 | 1.552 | 1.561 |
|     | H15....O10'    | 1.863 | 1.875 | 1.775 | 1.756 |
|     | H16'....O10    | 1.892 | 1.905 | 1.806 | 1.740 |

|                           |              |       |       |       |       |
|---------------------------|--------------|-------|-------|-------|-------|
|                           | H16'....O10" | 1.865 | 1.881 | 1.773 | 1.770 |
|                           | H17"....O10' | 1.852 | 1.859 | 1.752 | 1.771 |
| <b>structure T9-M5,3"</b> |              |       |       |       |       |
| 1                         | H15....O14   | 1.620 | 1.623 | 1.471 | 1.477 |
|                           | H17'....O14' | 1.614 | 1.617 | 1.469 | 1.477 |
|                           | H17"....O14" | 1.626 | 1.629 | 1.482 | 1.489 |
|                           | H16'....O8   | 1.802 | 1.809 | 1.694 | 1.675 |
|                           | H16....O12'  | 1.838 | 1.845 | 1.745 | 1.728 |
|                           | H16"....O10' | 1.847 | 1.857 | 1.758 | 1.738 |
|                           | H15'....O12" | 1.833 | 1.840 | 1.733 | 1.715 |
| 1-y                       | H15....O14   | 1.623 | 1.626 | 1.475 | 1.480 |
|                           | H17'....O14' | 1.616 | 1.619 | 1.469 | 1.478 |
|                           | H17"....O14" | 1.626 | 1.630 | 1.483 | 1.490 |
|                           | H16'....O8   | 1.821 | 1.829 | 1.710 | 1.683 |
|                           | H16....O12'  | 1.849 | 1.856 | 1.748 | 1.733 |
|                           | H16"....O10' | 1.858 | 1.868 | 1.767 | 1.745 |
|                           | H15'....O12" | 1.835 | 1.842 | 1.734 | 1.720 |
| 2                         | H15....O14   | 1.618 | 1.621 | 1.468 | 1.474 |
|                           | H17'....O14' | 1.617 | 1.620 | 1.474 | 1.483 |
|                           | H15"....O14" | 1.654 | 1.658 | 1.528 | 1.538 |
|                           | H16'....O8   | 1.798 | 1.805 | 1.686 | 1.668 |
|                           | H16....O12'  | 1.844 | 1.850 | 1.754 | 1.737 |
|                           | H17"....O10' | 1.850 | 1.861 | 1.757 | 1.736 |
|                           | H15'....O10" | 1.874 | 1.885 | 1.790 | 1.776 |
| 2-y                       | H15....O14   | 1.621 | 1.624 | 1.474 | 1.449 |
|                           | H17'....O14' | 1.621 | 1.624 | 1.483 | 1.465 |
|                           | H15"....O14" | 1.658 | 1.664 | 1.538 | 1.551 |
|                           | H16'....O8   | 1.819 | 1.827 | 1.668 | 1.653 |
|                           | H16....O12'  | 1.859 | 1.865 | 1.737 | 1.745 |
|                           | H17"....O10' | 1.873 | 1.883 | 1.736 | 1.705 |
|                           | H15'....O10" | 1.888 | 1.899 | 1.776 | 1.793 |
| 3                         | H15....O14   | 1.625 | 1.629 | 1.468 | 1.474 |
|                           | H15'....O14' | 1.614 | 1.617 | 1.474 | 1.483 |
|                           | H15"....O14" | 1.654 | 1.657 | 1.528 | 1.538 |
|                           | H17'....O8   | 1.834 | 1.841 | 1.686 | 1.668 |
|                           | H16....O10'  | 1.853 | 1.864 | 1.754 | 1.737 |
|                           | H17"....O8'  | 1.835 | 1.844 | 1.757 | 1.736 |
|                           | H16'....O10" | 1.840 | 1.853 | 1.790 | 1.776 |
| 3-y                       | H15....O14   | 1.625 | 1.629 | 1.471 | 1.479 |
|                           | H15'....O14' | 1.617 | 1.620 | 1.474 | 1.487 |
|                           | H15"....O14" | 1.653 | 1.656 | 1.529 | 1.547 |



|     |                |       |       |       |       |
|-----|----------------|-------|-------|-------|-------|
|     | H17'....O8     | 1.842 | 1.841 | 1.703 | 1.681 |
|     | H16....O10'    | 1.864 | 1.869 | 1.756 | 1.752 |
|     | H17''....O8'   | 1.846 | 1.857 | 1.768 | 1.752 |
|     | H16'....O10''  | 1.869 | 1.872 | 1.787 | 1.812 |
| 4   | H15....O14     | 1.652 | 1.658 | 1.490 | 1.499 |
|     | H17'....O14'   | 1.616 | 1.619 | 1.471 | 1.479 |
|     | H17''....O14'' | 1.626 | 1.629 | 1.482 | 1.489 |
|     | H10'....O8     | 1.807 | 1.814 | 1.700 | 1.682 |
|     | H16....O12'    | 1.844 | 1.850 | 1.749 | 1.733 |
|     | H16''....O10'  | 1.848 | 1.858 | 1.758 | 1.738 |
|     | H15'....O12''  | 1.835 | 1.842 | 1.734 | 1.717 |
| 4-y | H15....O14     | 1.655 | 1.662 | 1.493 | 1.502 |
|     | H17'....O14'   | 1.618 | 1.622 | 1.472 | 1.481 |
|     | H17''....O14'' | 1.627 | 1.630 | 1.483 | 1.491 |
|     | H10'....O8     | 1.827 | 1.835 | 1.716 | 1.690 |
|     | H16....O12'    | 1.857 | 1.863 | 1.754 | 1.740 |
|     | H16''....O10'  | 1.860 | 1.870 | 1.768 | 1.745 |
|     | H15'....O12''  | 1.838 | 1.845 | 1.736 | 1.722 |
| 5   | H15....O14     | 1.650 | 1.656 | 1.487 | 1.497 |
|     | H17'....O14'   | 1.619 | 1.622 | 1.476 | 1.485 |
|     | H15''....O14'' | 1.655 | 1.659 | 1.529 | 1.538 |
|     | H16'....O8     | 1.804 | 1.811 | 1.692 | 1.675 |
|     | H16....O12'    | 1.850 | 1.856 | 1.759 | 1.743 |
|     | H17''....O10'  | 1.850 | 1.861 | 1.757 | 1.736 |
|     | H15'....O10''  | 1.875 | 1.886 | 1.791 | 1.777 |
| 5-y | H15....O14     | 1.644 | 1.649 | 1.490 | 1.501 |
|     | H17'....O14'   | 1.623 | 1.626 | 1.476 | 1.489 |
|     | H15''....O14'' | 1.673 | 1.676 | 1.531 | 1.568 |
|     | H16'....O8     | 1.822 | 1.832 | 1.708 | 1.682 |
|     | H16....O12'    | 1.873 | 1.879 | 1.762 | 1.761 |
|     | H17''....O10'  | 1.862 | 1.877 | 1.767 | 1.746 |
|     | H15'....O10''  | 1.899 | 1.907 | 1.891 | 1.836 |
| 6   | H17....O14     | 1.657 | 1.661 | 1.530 | 1.540 |
|     | H15'....O14'   | 1.617 | 1.621 | 1.473 | 1.483 |
|     | H15''....O14'' | 1.654 | 1.657 | 1.528 | 1.537 |
|     | H15....O10'    | 1.857 | 1.868 | 1.769 | 1.749 |
|     | H17'....O10    | 1.875 | 1.886 | 1.789 | 1.776 |
|     | H16'....O10''  | 1.839 | 1.852 | 1.753 | 1.738 |
|     | H17''....O10'  | 1.843 | 1.851 | 1.751 | 1.736 |
| 6-y | H17....O14     | 1.658 | 1.666 | 1.532 | 1.550 |
|     | H15'....O14'   | 1.620 | 1.624 | 1.474 | 1.494 |
|     | H15''....O14'' | 1.654 | 1.658 | 1.528 | 1.537 |

|                                    |                |       |       |       |       |
|------------------------------------|----------------|-------|-------|-------|-------|
|                                    | H15....O10'    | 1.868 | 1.882 | 1.778 | 1.780 |
|                                    | H17'....O10    | 1.879 | 1.893 | 1.795 | 1.834 |
|                                    | H16'....O10''  | 1.854 | 1.870 | 1.763 | 1.764 |
|                                    | H17''....O10'  | 1.853 | 1.863 | 1.755 | 1.783 |
| <b>structure T9-ET6,2''</b>        |                |       |       |       |       |
| 1                                  | H15....O14     | 1.614 | 1.616 | 1.467 | 1.476 |
|                                    | H15'....O14'   | 1.616 | 1.618 | 1.472 | 1.481 |
|                                    | H17''....O14'' | 1.608 | 1.610 | 1.457 | 1.465 |
|                                    | H17'....O8     | 1.841 | 1.849 | 1.742 | 1.725 |
|                                    | H16....O10'    | 1.859 | 1.867 | 1.772 | 1.751 |
|                                    | H16''....O8'   | 1.852 | 1.857 | 1.759 | 1.742 |
|                                    | H16'....O12''  | 1.811 | 1.818 | 1.704 | 1.685 |
| 1-y                                | H15....O14     | 1.614 | 1.617 | 1.468 | 1.478 |
|                                    | H15'....O14'   | 1.618 | 1.621 | 1.473 | 1.481 |
|                                    | H17''....O14'' | 1.611 | 1.614 | 1.461 | 1.468 |
|                                    | H17'....O8     | 1.843 | 1.850 | 1.743 | 1.729 |
|                                    | H16....O10'    | 1.872 | 1.881 | 1.783 | 1.762 |
|                                    | H16''....O8'   | 1.865 | 1.869 | 1.764 | 1.749 |
|                                    | H16'....O12''  | 1.833 | 1.841 | 1.720 | 1.695 |
| <b>structure T9-M5,3''-ET6,2''</b> |                |       |       |       |       |
| 1                                  | H15....O14     | 1.658 | 1.665 | 1.486 | 1.496 |
|                                    | H15'....O14'   | 1.614 | 1.617 | 1.469 | 1.478 |
|                                    | H17''....O14'' | 1.652 | 1.659 | 1.475 | 1.485 |
|                                    | H17'....O8     | 1.832 | 1.840 | 1.731 | 1.716 |
|                                    | H16....O10'    | 1.851 | 1.861 | 1.760 | 1.742 |
|                                    | H16''....O8'   | 1.844 | 1.850 | 1.748 | 1.733 |
|                                    | H16'....O12''  | 1.800 | 1.807 | 1.691 | 1.675 |
| 1-y                                | H15....O14     | 1.659 | 1.667 | 1.486 | 1.498 |
|                                    | H15'....O14'   | 1.617 | 1.620 | 1.470 | 1.479 |
|                                    | H17''....O14'' | 1.657 | 1.665 | 1.478 | 1.488 |
|                                    | H17'....O8     | 1.835 | 1.843 | 1.732 | 1.722 |
|                                    | H16....O10'    | 1.864 | 1.874 | 1.771 | 1.750 |
|                                    | H16''....O8'   | 1.859 | 1.866 | 1.754 | 1.742 |
|                                    | H16'....O12''  | 1.820 | 1.829 | 1.707 | 1.682 |
| <b>structure T9-M5,3''-ET6,4''</b> |                |       |       |       |       |
| 1                                  | H15....O14     | 1.658 | 1.665 | 1.485 | 1.496 |
|                                    | H15'....O14'   | 1.616 | 1.619 | 1.470 | 1.478 |
|                                    | H15''....O14'' | 1.673 | 1.682 | 1.546 | 1.557 |

|                                      |                |       |       |       |       |
|--------------------------------------|----------------|-------|-------|-------|-------|
|                                      | H17'....O8     | 1.830 | 1.839 | 1.731 | 1.716 |
|                                      | H16....O10'    | 1.848 | 1.858 | 1.760 | 1.738 |
|                                      | H17''....O8'   | 1.850 | 1.859 | 1.752 | 1.732 |
|                                      | H16'....O10''  | 1.805 | 1.808 | 1.689 | 1.661 |
| 1-y                                  | H15....O14     | 1.657 | 1.664 | 1.485 | 1.496 |
|                                      | H15'....O14'   | 1.618 | 1.621 | 1.471 | 1.479 |
|                                      | H15''....O14'' | 1.673 | 1.682 | 1.546 | 1.557 |
|                                      | H17'....O8     | 1.827 | 1.835 | 1.729 | 1.716 |
|                                      | H16....O10'    | 1.865 | 1.874 | 1.775 | 1.754 |
|                                      | H17''....O8'   | 1.865 | 1.871 | 1.757 | 1.739 |
|                                      | H16'....O10''  | 1.822 | 1.823 | 1.699 | 1.668 |
| 1-y-out-in                           | H15....O14     | 1.654 | 1.661 | 1.483 | 1.492 |
|                                      | H15'....O14'   | 1.618 | 1.621 | 1.471 | 1.484 |
|                                      | H15''....O14'' | 1.674 | 1.684 | 1.549 | 1.563 |
|                                      | H17'....O8     | 1.837 | 1.843 | 1.724 | 1.704 |
|                                      | H16....O10'    | 1.874 | 1.882 | 1.781 | 1.752 |
|                                      | H17''....O8'   | 1.864 | 1.871 | 1.769 | 1.776 |
|                                      | H16'....O10''  | 1.822 | 1.824 | 1.836 | 1.820 |
| 1-y-in-in                            | H15....O14     | 1.651 | 1.658 | 1.484 | 1.492 |
|                                      | H15'....O14'   | 1.622 | 1.624 | 1.470 | 1.484 |
|                                      | H15''....O14'' | 1.687 | 1.692 | 1.549 | 1.563 |
|                                      | H17'....O8     | 1.819 | 1.825 | 1.733 | 1.710 |
|                                      | H16....O10'    | 1.876 | 1.884 | 1.792 | 1.762 |
|                                      | H17''....O8'   | 1.895 | 1.901 | 1.767 | 1.774 |
|                                      | H16'....O10''  | 1.990 | 2.010 | 1.838 | 1.825 |
| <b>structure T9-KT6''-M5,3'',3''</b> |                |       |       |       |       |
| 1                                    | H15....O14     | 1.625 | 1.628 | 1.482 | 1.488 |
|                                      | H15'....O14'   | 1.610 | 1.612 | 1.461 | 1.468 |
|                                      | H15''....O14'' | 1.630 | 1.633 | 1.449 | 1.466 |
|                                      | H17'....O8     | 1.827 | 1.837 | 1.735 | 1.716 |
|                                      | H16....O10'    | 1.829 | 1.839 | 1.741 | 1.719 |
|                                      | H16''....O8'   | 1.843 | 1.848 | 1.722 | 1.701 |
|                                      | H16'....O12''  | 1.711 | 1.714 | 1.584 | 1.567 |
| 1-y                                  | H15....O14     | 1.626 | 1.630 | 1.483 | 1.493 |
|                                      | H15'....O14'   | 1.611 | 1.613 | 1.461 | 1.473 |
|                                      | H15''....O14'' | 1.631 | 1.634 | 1.450 | 1.480 |
|                                      | H17'....O8     | 1.835 | 1.840 | 1.737 | 1.737 |
|                                      | H16....O10'    | 1.850 | 1.860 | 1.754 | 1.724 |
|                                      | H16''....O8'   | 1.849 | 1.849 | 1.725 | 1.729 |
|                                      | H16'....O12''  | 1.721 | 1.727 | 1.596 | 1.563 |
| 2                                    | H15....O14     | 1.617 | 1.620 | 1.468 | 1.474 |

|     |                |       |       |       |       |
|-----|----------------|-------|-------|-------|-------|
|     | H17'....O14'   | 1.614 | 1.616 | 1.469 | 1.477 |
|     | H15''....O14'' | 1.630 | 1.633 | 1.449 | 1.466 |
|     | H16'....O8     | 1.796 | 1.803 | 1.688 | 1.667 |
|     | H16....O12'    | 1.831 | 1.838 | 1.741 | 1.724 |
|     | H16''....O10'  | 1.842 | 1.833 | 1.738 | 1.714 |
|     | H16'....O12''  | 1.739 | 1.742 | 1.634 | 1.619 |
| 2-y | H15....O14     | 1.621 | 1.624 | 1.473 | 1.477 |
|     | H17'....O14'   | 1.617 | 1.619 | 1.470 | 1.479 |
|     | H15''....O14'' | 1.630 | 1.633 | 1.449 | 1.465 |
|     | H16'....O8     | 1.818 | 1.826 | 1.706 | 1.676 |
|     | H16....O12'    | 1.845 | 1.852 | 1.747 | 1.731 |
|     | H16''....O10'  | 1.860 | 1.866 | 1.745 | 1.716 |
|     | H16'....O12''  | 1.742 | 1.744 | 1.634 | 1.620 |
| 3   | H17....O14     | 1.655 | 1.658 | 1.529 | 1.538 |
|     | H15'....O14'   | 1.613 | 1.615 | 1.466 | 1.473 |
|     | H15''....O14'' | 1.630 | 1.633 | 1.448 | 1.465 |
|     | H15....O10'    | 1.827 | 1.839 | 1.737 | 1.711 |
|     | H17'....O10    | 1.863 | 1.878 | 1.789 | 1.771 |
|     | H16'....O12''  | 1.706 | 1.709 | 1.575 | 1.557 |
|     | H16''....O8'   | 1.848 | 1.854 | 1.730 | 1.709 |
| 3-y | H17....O14     | 1.665 | 1.674 | 1.535 | 1.551 |
|     | H15'....O14'   | 1.615 | 1.617 | 1.464 | 1.473 |
|     | H15''....O14'' | 1.631 | 1.634 | 1.444 | 1.462 |
|     | H15....O10'    | 1.862 | 1.865 | 1.745 | 1.711 |
|     | H17'....O10    | 1.881 | 1.889 | 1.770 | 1.757 |
|     | H16'....O12''  | 1.718 | 1.721 | 1.594 | 1.562 |
|     | H16''....O8'   | 1.848 | 1.853 | 1.725 | 1.712 |
| 4   | H17....O14     | 1.654 | 1.657 | 1.528 | 1.537 |
|     | H17'....O14'   | 1.613 | 1.616 | 1.468 | 1.477 |
|     | H15''....O14'' | 1.630 | 1.633 | 1.447 | 1.464 |
|     | H15....O12'    | 1.827 | 1.836 | 1.738 | 1.721 |
|     | H17'....O10    | 1.835 | 1.848 | 1.753 | 1.735 |
|     | H15'....O12''  | 1.738 | 1.741 | 1.632 | 1.618 |
|     | H16''....O10'  | 1.844 | 1.852 | 1.749 | 1.726 |
| 4-y | H17....O14     | 1.653 | 1.656 | 1.528 | 1.536 |
|     | H17'....O14'   | 1.617 | 1.620 | 1.470 | 1.480 |
|     | H15''....O14'' | 1.630 | 1.633 | 1.447 | 1.464 |
|     | H15....O12'    | 1.852 | 1.860 | 1.748 | 1.736 |
|     | H17'....O10    | 1.864 | 1.878 | 1.772 | 1.750 |
|     | H15'....O12''  | 1.740 | 1.742 | 1.633 | 1.620 |
|     | H16''....O10'  | 1.856 | 1.862 | 1.754 | 1.724 |
| 5   | H17....O14     | 1.666 | 1.668 | 1.545 | 1.556 |

|     |                |       |       |       |       |
|-----|----------------|-------|-------|-------|-------|
|     | H15'....O14'   | 1.681 | 1.688 | 1.528 | 1.542 |
|     | H15''....O14'' | 1.627 | 1.630 | 1.440 | 1.459 |
|     | H15....O10'    | 1.856 | 1.859 | 1.780 | 1.754 |
|     | H16....O12'    | 1.898 | 1.896 | 1.804 | 1.800 |
|     | H16'....O12''  | 1.693 | 1.696 | 1.561 | 1.546 |
|     | H16''....O8'   | 1.891 | 1.898 | 1.798 | 1.776 |
| 5-y | H17....O14     | 1.694 | 1.694 | 1.544 | 1.571 |
|     | H15'....O14'   | 1.695 | 1.704 | 1.526 | 1.536 |
|     | H15''....O14'' | 1.627 | 1.627 | 1.446 | 1.457 |
|     | H15....O10'    | 1.901 | 1.901 | 1.803 | 1.771 |
|     | H16....O12'    | 1.956 | 1.935 | 1.785 | 1.786 |
|     | H16'....O12''  | 1.700 | 1.703 | 1.581 | 1.553 |
|     | H16''....O8'   | 1.912 | 1.904 | 1.805 | 1.791 |
| 6   | H17....O14     | 1.666 | 1.667 | 1.544 | 1.554 |
|     | H15'....O14'   | 1.672 | 1.678 | 1.523 | 1.535 |
|     | H15''....O14'' | 1.627 | 1.630 | 1.440 | 1.458 |
|     | H15....O12'    | 1.867 | 1.866 | 1.785 | 1.767 |
|     | H16....O10'    | 1.885 | 1.880 | 1.793 | 1.771 |
|     | H16''....O8'   | 1.893 | 1.900 | 1.800 | 1.776 |
|     | H16'....O12''  | 1.700 | 1.701 | 1.564 | 1.551 |
| 6-y | H17....O14     | 1.664 | 1.667 | 1.543 | 1.552 |
|     | H15'....O14'   | 1.679 | 1.687 | 1.522 | 1.533 |
|     | H15''....O14'' | 1.631 | 1.630 | 1.437 | 1.464 |
|     | H15....O12'    | 1.872 | 1.870 | 1.780 | 1.772 |
|     | H16....O10'    | 1.899 | 1.898 | 1.802 | 1.778 |
|     | H16''....O8'   | 1.909 | 1.907 | 1.809 | 1.823 |
|     | H16'....O12''  | 1.695 | 1.703 | 1.564 | 1.538 |
| 7   | H17....O14     | 1.667 | 1.669 | 1.541 | 1.552 |
|     | H17'....O14'   | 1.623 | 1.625 | 1.481 | 1.490 |
|     | H15''....O14'' | 1.624 | 1.627 | 1.424 | 1.443 |
|     | H15....O12'    | 1.839 | 1.841 | 1.752 | 1.734 |
|     | H16....O10'    | 1.883 | 1.881 | 1.808 | 1.790 |
|     | H15'....O12''  | 1.794 | 1.793 | 1.676 | 1.668 |
|     | H16''....O10'  | 1.948 | 1.946 | 1.856 | 1.843 |
| 7-y | H17....O14     | 1.663 | 1.664 | 1.539 | 1.556 |
|     | H17'....O14'   | 1.626 | 1.625 | 1.483 | 1.495 |
|     | H15''....O14'' | 1.625 | 1.627 | 1.426 | 1.447 |
|     | H15....O12'    | 1.859 | 1.851 | 1.761 | 1.750 |
|     | H16....O10'    | 1.885 | 1.880 | 1.808 | 1.761 |
|     | H15'....O12''  | 1.797 | 1.790 | 1.671 | 1.669 |
|     | H16''....O10'  | 1.938 | 1.934 | 1.836 | 1.801 |
| 8   | H17....O14     | 1.671 | 1.674 | 1.550 | 1.561 |

|      |                |       |       |       |       |
|------|----------------|-------|-------|-------|-------|
|      | H17'....O14'   | 1.632 | 1.634 | 1.486 | 1.497 |
|      | H15''....O14'' | 1.624 | 1.627 | 1.424 | 1.443 |
|      | H15....O10'    | 1.858 | 1.860 | 1.794 | 1.769 |
|      | H16....O12'    | 1.868 | 1.861 | 1.767 | 1.755 |
|      | H16'....O10''  | 1.946 | 1.944 | 1.853 | 1.838 |
|      | H15'....O12''  | 1.792 | 1.792 | 1.676 | 1.669 |
| 8-y  | H17....O14     | 1.681 | 1.699 | 1.553 | 1.595 |
|      | H17'....O14'   | 1.635 | 1.637 | 1.487 | 1.504 |
|      | H15''....O14'' | 1.625 | 1.627 | 1.425 | 1.446 |
|      | H15....O10'    | 1.888 | 1.899 | 1.798 | 1.768 |
|      | H16....O12'    | 1.901 | 1.905 | 1.773 | 1.801 |
|      | H16'....O10''  | 1.931 | 1.932 | 1.841 | 1.795 |
|      | H15'....O12''  | 1.786 | 1.788 | 1.670 | 1.657 |
| 9    | H17....O14     | 1.666 | 1.669 | 1.543 | 1.553 |
|      | H17'....O14'   | 1.628 | 1.629 | 1.493 | 1.501 |
|      | H15''....O14'' | 1.622 | 1.625 | 1.419 | 1.438 |
|      | H15....O12'    | 1.842 | 1.846 | 1.767 | 1.750 |
|      | H16....O10'    | 1.870 | 1.871 | 1.796 | 1.774 |
|      | H15'....O10''  | 1.977 | 1.978 | 1.902 | 1.884 |
|      | H16'....O12''  | 1.767 | 1.766 | 1.630 | 1.621 |
| 9-y  | H17....O14     | 1.664 | 1.665 | 1.541 | 1.550 |
|      | H17'....O14'   | 1.629 | 1.632 | 1.491 | 1.500 |
|      | H15''....O14'' | 1.624 | 1.625 | 1.413 | 1.438 |
|      | H15....O12'    | 1.863 | 1.856 | 1.763 | 1.755 |
|      | H16....O10'    | 1.916 | 1.907 | 1.809 | 1.805 |
|      | H15'....O10''  | 1.956 | 1.954 | 1.889 | 1.893 |
|      | H16'....O12''  | 1.746 | 1.751 | 1.624 | 1.605 |
| 10   | H17....O14     | 1.668 | 1.669 | 1.547 | 1.557 |
|      | H17'....O14'   | 1.636 | 1.638 | 1.498 | 1.509 |
|      | H15''....O14'' | 1.622 | 1.625 | 1.419 | 1.438 |
|      | H15....O10'    | 1.846 | 1.851 | 1.781 | 1.757 |
|      | H16....O12'    | 1.875 | 1.873 | 1.787 | 1.779 |
|      | H16'....O12''  | 1.762 | 1.760 | 1.627 | 1.616 |
|      | H15'....O10''  | 1.979 | 1.979 | 1.903 | 1.884 |
| 10-y | H17....O14     | 1.690 | 1.692 | 1.545 | 1.574 |
|      | H17'....O14'   | 1.642 | 1.645 | 1.493 | 1.503 |
|      | H15''....O14'' | 1.617 | 1.621 | 1.425 | 1.438 |
|      | H15....O10'    | 1.900 | 1.901 | 1.813 | 1.790 |
|      | H16....O12'    | 1.932 | 1.920 | 1.764 | 1.771 |
|      | H16'....O12''  | 1.760 | 1.762 | 1.637 | 1.608 |
|      | H15'....O10''  | 1.995 | 1.973 | 1.862 | 1.946 |

| structure T9-KT6"-M3",3"-ET4   |              |       |       |       |       |
|--------------------------------|--------------|-------|-------|-------|-------|
| 1                              | H17....O14   | 1.685 | 1.688 | 1.552 | 1.562 |
|                                | H17'....O14' | 1.616 | 1.619 | 1.470 | 1.479 |
|                                | H15"....O14" | 1.630 | 1.633 | 1.447 | 1.464 |
|                                | H15....O12'  | 1.838 | 1.845 | 1.742 | 1.727 |
|                                | H16'....O10  | 1.827 | 1.834 | 1.733 | 1.702 |
|                                | H15'....O12" | 1.740 | 1.744 | 1.635 | 1.621 |
|                                | H16"....O10' | 1.844 | 1.851 | 1.747 | 1.720 |
| 1-y                            | H17....O14   | 1.684 | 1.687 | 1.552 | 1.562 |
|                                | H17'....O14' | 1.619 | 1.622 | 1.472 | 1.481 |
|                                | H15"....O14" | 1.630 | 1.633 | 1.447 | 1.464 |
|                                | H15....O12'  | 1.861 | 1.867 | 1.753 | 1.737 |
|                                | H16'....O10  | 1.850 | 1.860 | 1.751 | 1.706 |
|                                | H15'....O12" | 1.741 | 1.744 | 1.635 | 1.623 |
|                                | H16"....O10' | 1.854 | 1.860 | 1.752 | 1.716 |
| structure T9-KT6"-M5,3",3"-ET6 |              |       |       |       |       |
| 1                              | H15....O14   | 1.648 | 1.655 | 1.471 | 1.481 |
|                                | H17'....O14' | 1.614 | 1.616 | 1.469 | 1.478 |
|                                | H15"....O14" | 1.630 | 1.633 | 1.449 | 1.466 |
|                                | H16'....O8   | 1.795 | 1.802 | 1.686 | 1.668 |
|                                | H16....O12'  | 1.837 | 1.844 | 1.744 | 1.728 |
|                                | H16"....O10' | 1.842 | 1.849 | 1.738 | 1.714 |
|                                | H15'....O12" | 1.739 | 1.742 | 1.635 | 1.619 |
| 1-y                            | H15....O14   | 1.652 | 1.658 | 1.478 | 1.486 |
|                                | H17'....O14' | 1.617 | 1.619 | 1.471 | 1.481 |
|                                | H15"....O14" | 1.630 | 1.633 | 1.448 | 1.465 |
|                                | H16'....O8   | 1.818 | 1.826 | 1.712 | 1.684 |
|                                | H16....O12'  | 1.852 | 1.859 | 1.749 | 1.743 |
|                                | H16"....O10' | 1.860 | 1.865 | 1.746 | 1.717 |
|                                | H15'....O12" | 1.742 | 1.744 | 1.635 | 1.621 |
| structure T9-KT2,6"-M5,5,3",3" |              |       |       |       |       |
| 1                              | H17....O14   | 1.630 | 1.633 | 1.449 | 1.466 |
|                                | H15'....O14' | 1.610 | 1.612 | 1.461 | 1.468 |
|                                | H15"....O14" | 1.630 | 1.633 | 1.449 | 1.466 |
|                                | H17'....O8   | 1.743 | 1.746 | 1.637 | 1.621 |
|                                | H16....O10'  | 1.830 | 1.835 | 1.720 | 1.696 |
|                                | H16"....O8'  | 1.840 | 1.845 | 1.718 | 1.697 |
|                                | H16'....O12" | 1.707 | 1.709 | 1.577 | 1.559 |
| 1-y                            | H17....O14   | 1.630 | 1.633 | 1.449 | 1.464 |

|                      |                |       |       |       |       |
|----------------------|----------------|-------|-------|-------|-------|
|                      | H15'....O14'   | 1.612 | 1.613 | 1.461 | 1.473 |
|                      | H15''....O14'' | 1.631 | 1.635 | 1.450 | 1.482 |
|                      | H17'....O8     | 1.745 | 1.746 | 1.638 | 1.629 |
|                      | H16....O10'    | 1.853 | 1.857 | 1.731 | 1.694 |
|                      | H16''....O8'   | 1.844 | 1.848 | 1.722 | 1.724 |
|                      | H16'....O12''  | 1.721 | 1.725 | 1.593 | 1.557 |
| <b>structure T10</b> |                |       |       |       |       |
| 1                    | H15....O14     | 1.602 | 1.605 | 1.449 | 1.458 |
|                      | H17'....O14'   | 1.623 | 1.635 | 1.451 | 1.461 |
|                      | H17''....O14'' | 1.612 | 1.612 | 1.460 | 1.468 |
|                      | H16'....O8     | 1.812 | 1.819 | 1.703 | 1.684 |
|                      | H16....O12'    | 1.850 | 1.855 | 1.750 | 1.734 |
|                      | H16''....O10'  | 1.857 | 1.867 | 1.766 | 1.745 |
|                      | H15'....O12''  | 1.844 | 1.854 | 1.740 | 1.721 |
| 1-y                  | H15....O14     | 1.605 | 1.608 | 1.453 | 1.460 |
|                      | H17'....O14'   | 1.612 | 1.626 | 1.453 | 1.462 |
|                      | H17''....O14'' | 1.608 | 1.612 | 1.461 | 1.470 |
|                      | H16'....O8     | 1.834 | 1.843 | 1.719 | 1.694 |
|                      | H16....O12'    | 1.861 | 1.867 | 1.755 | 1.740 |
|                      | H16''....O10'  | 1.865 | 1.874 | 1.777 | 1.757 |
|                      | H15'....O12''  | 1.839 | 1.846 | 1.742 | 1.725 |
| 2                    | H15....O14     | 1.600 | 1.603 | 1.446 | 1.454 |
|                      | H17'....O14'   | 1.636 | 1.648 | 1.456 | 1.466 |
|                      | H15''....O14'' | 1.709 | 1.728 | 1.535 | 1.549 |
|                      | H16'....O8     | 1.807 | 1.814 | 1.694 | 1.675 |
|                      | H16....O12'    | 1.855 | 1.860 | 1.760 | 1.745 |
|                      | H17''....O10'  | 1.837 | 1.846 | 1.749 | 1.728 |
|                      | H15'....O10''  | 1.873 | 1.885 | 1.795 | 1.784 |
| 2-y                  | H15....O14     | 1.604 | 1.608 | 1.448 | 1.449 |
|                      | H17'....O14'   | 1.646 | 1.658 | 1.457 | 1.465 |
|                      | H15''....O14'' | 1.718 | 1.725 | 1.535 | 1.551 |
|                      | H16'....O8     | 1.821 | 1.833 | 1.707 | 1.653 |
|                      | H16....O12'    | 1.863 | 1.868 | 1.763 | 1.745 |
|                      | H17''....O10'  | 1.858 | 1.873 | 1.761 | 1.705 |
|                      | H15'....O10''  | 1.895 | 1.908 | 1.801 | 1.793 |
| 3                    | H15....O14     | 1.611 | 1.615 | 1.458 | 1.466 |
|                      | H15'....O14'   | 1.622 | 1.633 | 1.448 | 1.458 |
|                      | H15''....O14'' | 1.705 | 1.723 | 1.535 | 1.548 |
|                      | H17'....O8     | 1.843 | 1.853 | 1.737 | 1.718 |
|                      | H16....O10'    | 1.861 | 1.870 | 1.776 | 1.757 |
|                      | H17''....O8'   | 1.833 | 1.841 | 1.732 | 1.714 |



|     |              |       |       |       |       |
|-----|--------------|-------|-------|-------|-------|
|     | H16'....O10" | 1.850 | 1.863 | 1.764 | 1.752 |
| 3-y | H15....O14   | 1.611 | 1.615 | 1.458 | 1.467 |
|     | H15'....O14' | 1.638 | 1.649 | 1.449 | 1.458 |
|     | H15"....O14" | 1.716 | 1.731 | 1.534 | 1.544 |
|     | H17'....O8   | 1.841 | 1.852 | 1.739 | 1.721 |
|     | H16....O10'  | 1.865 | 1.875 | 1.779 | 1.759 |
|     | H17"....O8'  | 1.847 | 1.858 | 1.737 | 1.720 |
|     | H16'....O10" | 1.868 | 1.885 | 1.777 | 1.758 |
| 4   | H15....O14   | 1.666 | 1.675 | 1.487 | 1.495 |
|     | H17'....O14' | 1.625 | 1.636 | 1.452 | 1.462 |
|     | H17"....O14" | 1.612 | 1.617 | 1.460 | 1.468 |
|     | H10'....O8   | 1.819 | 1.828 | 1.712 | 1.693 |
|     | H16....O12'  | 1.854 | 1.860 | 1.753 | 1.737 |
|     | H16"....O10' | 1.857 | 1.867 | 1.767 | 1.746 |
|     | H15'....O12" | 1.844 | 1.855 | 1.741 | 1.722 |
| 4-y | H15....O14   | 1.672 | 1.682 | 1.489 | 1.496 |
|     | H17'....O14' | 1.643 | 1.655 | 1.454 | 1.467 |
|     | H17"....O14" | 1.613 | 1.617 | 1.462 | 1.471 |
|     | H10'....O8   | 1.841 | 1.851 | 1.731 | 1.706 |
|     | H16....O12'  | 1.869 | 1.876 | 1.761 | 1.745 |
|     | H16"....O10' | 1.870 | 1.880 | 1.776 | 1.759 |
|     | H15'....O12" | 1.849 | 1.859 | 1.743 | 1.726 |
| 5   | H15....O14   | 1.660 | 1.666 | 1.482 | 1.490 |
|     | H17'....O14' | 1.640 | 1.653 | 1.458 | 1.467 |
|     | H15"....O14" | 1.710 | 1.729 | 1.536 | 1.549 |
|     | H16'....O8   | 1.819 | 1.827 | 1.705 | 1.687 |
|     | H16....O12'  | 1.861 | 1.867 | 1.765 | 1.749 |
|     | H17"....O10' | 1.838 | 1.848 | 1.750 | 1.730 |
|     | H15'....O10" | 1.873 | 1.886 | 1.796 | 1.785 |
| 5-y | H15....O14   | 1.659 | 1.669 | 1.485 | 1.479 |
|     | H17'....O14' | 1.650 | 1.662 | 1.459 | 1.467 |
|     | H15"....O14" | 1.718 | 1.726 | 1.537 | 1.556 |
|     | H16'....O8   | 1.828 | 1.842 | 1.717 | 1.660 |
|     | H16....O12'  | 1.879 | 1.876 | 1.768 | 1.749 |
|     | H17"....O10' | 1.848 | 1.869 | 1.759 | 1.691 |
|     | H15'....O10" | 1.892 | 1.908 | 1.803 | 1.790 |
| 6   | H17....O14   | 1.622 | 1.639 | 1.538 | 1.547 |
|     | H15'....O14' | 1.631 | 1.643 | 1.453 | 1.462 |
|     | H15"....O14" | 1.707 | 1.725 | 1.535 | 1.548 |
|     | H15....O10'  | 1.859 | 1.875 | 1.764 | 1.741 |
|     | H16'....O10  | 1.891 | 1.910 | 1.796 | 1.781 |
|     | H16'....O10" | 1.848 | 1.862 | 1.758 | 1.746 |

|                                         |                |       |       |       |       |
|-----------------------------------------|----------------|-------|-------|-------|-------|
|                                         | H17''....O10'  | 1.841 | 1.849 | 1.741 | 1.723 |
| 6-y                                     | H17....O14     | 1.626 | 1.646 | 1.539 | 1.606 |
|                                         | H15'....O14'   | 1.644 | 1.656 | 1.453 | 1.485 |
|                                         | H15''....O14'' | 1.717 | 1.732 | 1.536 | 1.559 |
|                                         | H15....O10'    | 1.870 | 1.884 | 1.769 | 1.794 |
|                                         | H16'....O10    | 1.898 | 1.917 | 1.796 | 1.885 |
|                                         | H16''....O10'' | 1.866 | 1.885 | 1.768 | 1.809 |
|                                         | H17''....O10'  | 1.854 | 1.867 | 1.745 | 1.810 |
| <b>structure T10-ET6,2''</b>            |                |       |       |       |       |
| 1                                       | H15....O14     | 1.617 | 1.626 | 1.447 | 1.457 |
|                                         | H15'....O14'   | 1.633 | 1.646 | 1.454 | 1.464 |
|                                         | H17''....O14'' | 1.611 | 1.618 | 1.436 | 1.446 |
|                                         | H17'....O8     | 1.835 | 1.844 | 1.735 | 1.716 |
|                                         | H16....O10'    | 1.854 | 1.863 | 1.767 | 1.748 |
|                                         | H16''....O8'   | 1.853 | 1.859 | 1.755 | 1.738 |
|                                         | H16'....O12''  | 1.810 | 1.818 | 1.698 | 1.680 |
| 1-y                                     | H15....O14     | 1.608 | 1.617 | 1.448 | 1.458 |
|                                         | H15'....O14'   | 1.613 | 1.627 | 1.454 | 1.463 |
|                                         | H17''....O14'' | 1.600 | 1.607 | 1.440 | 1.449 |
|                                         | H17'....O8     | 1.837 | 1.845 | 1.737 | 1.721 |
|                                         | H16....O10'    | 1.869 | 1.879 | 1.780 | 1.759 |
|                                         | H16''....O8'   | 1.865 | 1.871 | 1.759 | 1.744 |
|                                         | H16'....O12''  | 1.833 | 1.842 | 1.715 | 1.690 |
| <b>structure T10-M5,3''-ET6,2''</b>     |                |       |       |       |       |
| 1                                       | H15....O14     | 1.653 | 1.657 | 1.473 | 1.487 |
|                                         | H15'....O14'   | 1.633 | 1.644 | 1.452 | 1.461 |
|                                         | H17''....O14'' | 1.702 | 1.717 | 1.464 | 1.481 |
|                                         | H17'....O8     | 1.838 | 1.843 | 1.733 | 1.717 |
|                                         | H16....O10'    | 1.859 | 1.867 | 1.767 | 1.748 |
|                                         | H16''....O8'   | 1.847 | 1.854 | 1.746 | 1.731 |
|                                         | H16'....O12''  | 1.803 | 1.812 | 1.691 | 1.675 |
| 1-y                                     | H15....O14     | 1.659 | 1.665 | 1.475 | 1.490 |
|                                         | H15'....O14'   | 1.643 | 1.653 | 1.453 | 1.466 |
|                                         | H17''....O14'' | 1.709 | 1.724 | 1.467 | 1.477 |
|                                         | H17'....O8     | 1.834 | 1.845 | 1.736 | 1.724 |
|                                         | H16....O10'    | 1.865 | 1.877 | 1.778 | 1.758 |
|                                         | H16''....O8'   | 1.862 | 1.870 | 1.757 | 1.742 |
|                                         | H16'....O12''  | 1.823 | 1.832 | 1.713 | 1.688 |
| <b>structure T10-M5,3''-ET6,2'',6''</b> |                |       |       |       |       |

|                                        |                |       |       |       |       |
|----------------------------------------|----------------|-------|-------|-------|-------|
|                                        |                |       |       |       |       |
| 1                                      | H15....O14     | 1.702 | 1.717 | 1.565 | 1.484 |
|                                        | H17'....O14'   | 1.637 | 1.649 | 1.452 | 1.467 |
|                                        | H16'....O8     | 1.805 | 1.814 | 1.694 | 1.683 |
|                                        | H16....O12'    | 1.849 | 1.857 | 1.749 | 1.737 |
|                                        | H16''....O10'  | 1.884 | 1.891 | 1.786 | 1.781 |
|                                        | H15'....O12''  | 1.837 | 1.837 | 1.715 | 1.684 |
| 1-y                                    | H15....O14     | 1.708 | 1.723 | 1.566 | 1.495 |
|                                        | H17'....O14'   | 1.649 | 1.663 | 1.456 | 1.468 |
|                                        | H16'....O8     | 1.822 | 1.832 | 1.704 | 1.678 |
|                                        | H16....O12'    | 1.861 | 1.869 | 1.758 | 1.758 |
|                                        | H16''....O10'  | 1.877 | 1.894 | 1.804 | 1.771 |
|                                        | H15'....O12''  | 1.812 | 1.821 | 1.735 | 1.707 |
| <b>structure T10-KT2,6"-M5,5,3",3"</b> |                |       |       |       |       |
| 1                                      | H17....O14     | 1.665 | 1.661 | 1.393 | 1.412 |
|                                        | H15'....O14'   | 1.610 | 1.617 | 1.440 | 1.450 |
|                                        | H15''....O14'' | 1.611 | 1.614 | 1.426 | 1.445 |
|                                        | H17'....O8     | 1.739 | 1.746 | 1.631 | 1.611 |
|                                        | H16....O10'    | 1.826 | 1.833 | 1.714 | 1.695 |
|                                        | H16''....O8'   | 1.841 | 1.846 | 1.713 | 1.693 |
|                                        | H16'....O12''  | 1.708 | 1.709 | 1.575 | 1.556 |
| 1-y                                    | H17....O14     | 1.615 | 1.619 | 1.427 | 1.446 |
|                                        | H15'....O14'   | 1.627 | 1.632 | 1.441 | 1.453 |
|                                        | H15''....O14'' | 1.620 | 1.615 | 1.427 | 1.459 |
|                                        | H17'....O8     | 1.740 | 1.745 | 1.629 | 1.615 |
|                                        | H16....O10'    | 1.846 | 1.851 | 1.726 | 1.689 |
|                                        | H16''....O8'   | 1.841 | 1.853 | 1.716 | 1.713 |
|                                        | H16'....O12''  | 1.720 | 1.727 | 1.591 | 1.554 |
| <b>structure T11-ET6,2"</b>            |                |       |       |       |       |
| 1                                      | H15....O14     | 1.599 | 1.618 | 1.437 | 1.447 |
|                                        | H17'....O14'   | 1.635 | 1.658 | 1.454 | 1.463 |
|                                        | H17''....O14'' | 1.621 | 1.624 | 1.470 | 1.479 |
|                                        | H16'....O8     | 1.812 | 1.818 | 1.698 | 1.680 |
|                                        | H16....O12'    | 1.855 | 1.860 | 1.755 | 1.738 |
|                                        | H16''....O10'  | 1.860 | 1.862 | 1.767 | 1.748 |
|                                        | H15'....O12''  | 1.845 | 1.847 | 1.742 | 1.723 |
|                                        |                |       |       |       |       |
| 1-y                                    | H15....O14     | 1.600 | 1.607 | 1.440 | 1.450 |
|                                        | H17'....O14'   | 1.626 | 1.644 | 1.452 | 1.464 |
|                                        | H17''....O14'' | 1.621 | 1.625 | 1.471 | 1.481 |
|                                        | H16'....O8     | 1.834 | 1.843 | 1.715 | 1.690 |

|                                     |                |       |       |       |       |
|-------------------------------------|----------------|-------|-------|-------|-------|
|                                     | H16....O12'    | 1.867 | 1.873 | 1.760 | 1.745 |
|                                     | H16''....O10'  | 1.867 | 1.876 | 1.777 | 1.759 |
|                                     | H15'....O12''  | 1.838 | 1.847 | 1.743 | 1.727 |
| <b>structure T11-M5,3''-ET6,2''</b> |                |       |       |       |       |
| 1-y                                 | H15....O14     | 1.658 | 1.664 | 1.463 | 1.484 |
|                                     | H17'....O14'   | 1.627 | 1.646 | 1.450 | 1.465 |
|                                     | H17''....O14'' | 1.660 | 1.669 | 1.490 | 1.503 |
|                                     | H16'....O8     | 1.821 | 1.830 | 1.703 | 1.678 |
|                                     | H16....O12'    | 1.865 | 1.873 | 1.750 | 1.753 |
|                                     | H16''....O10'  | 1.859 | 1.869 | 1.766 | 1.740 |
|                                     | H15'....O12''  | 1.832 | 1.841 | 1.731 | 1.728 |
| 1                                   | H15....O14     | 1.701 | 1.717 | 1.463 | 1.481 |
|                                     | H17'....O14'   | 1.640 | 1.657 | 1.450 | 1.460 |
|                                     | H17''....O14'' | 1.659 | 1.669 | 1.489 | 1.500 |
|                                     | H16'....O8     | 1.802 | 1.811 | 1.690 | 1.675 |
|                                     | H16....O12'    | 1.846 | 1.854 | 1.745 | 1.730 |
|                                     | H16''....O10'  | 1.846 | 1.856 | 1.756 | 1.739 |
|                                     | H15'....O12''  | 1.829 | 1.839 | 1.731 | 1.714 |
| 1-y-out-in                          | H15....O14     | 1.695 | 1.709 | 1.465 | 1.477 |
|                                     | H17'....O14'   | 1.629 | 1.648 | 1.451 | 1.464 |
|                                     | H17''....O14'' | 1.660 | 1.669 | 1.490 | 1.502 |
|                                     | H16'....O8     | 1.838 | 1.847 | 1.711 | 1.686 |
|                                     | H16....O12'    | 1.872 | 1.879 | 1.757 | 1.743 |
|                                     | H16''....O10'  | 1.860 | 1.871 | 1.766 | 1.746 |
|                                     | H15'....O12''  | 1.830 | 1.840 | 1.733 | 1.720 |
| <b>structure T12-KT2-M5,5,3''</b>   |                |       |       |       |       |
| 1                                   | H17....O14     | 1.629 | 1.632 | 1.448 | 1.465 |
|                                     | H17'....O14'   | 1.610 | 1.612 | 1.461 | 1.468 |
|                                     | H17''....O14'' | 1.624 | 1.628 | 1.482 | 1.488 |
|                                     | H16'....O8     | 1.710 | 1.714 | 1.584 | 1.567 |
|                                     | H16....O12'    | 1.843 | 1.848 | 1.721 | 1.701 |
|                                     | H16''....O10'  | 1.829 | 1.839 | 1.741 | 1.718 |
|                                     | H16'....O12''  | 1.827 | 1.837 | 1.735 | 1.715 |
| 1-y                                 | H17....O14     | 1.631 | 1.633 | 1.449 | 1.484 |
|                                     | H17'....O14'   | 1.611 | 1.613 | 1.460 | 1.475 |
|                                     | H17''....O14'' | 1.626 | 1.629 | 1.483 | 1.493 |
|                                     | H16'....O8     | 1.721 | 1.727 | 1.597 | 1.567 |
|                                     | H16....O12'    | 1.849 | 1.849 | 1.724 | 1.735 |
|                                     | H16''....O10'  | 1.850 | 1.859 | 1.754 | 1.729 |

|     |              |       |       |       |       |
|-----|--------------|-------|-------|-------|-------|
|     | H16'....O12" | 1.835 | 1.840 | 1.736 | 1.741 |
| 2   | H17....O14   | 1.630 | 1.633 | 1.448 | 1.465 |
|     | H15'....O14' | 1.614 | 1.616 | 1.469 | 1.478 |
|     | H17"....O14" | 1.617 | 1.620 | 1.468 | 1.474 |
|     | H17'....O8   | 1.739 | 1.741 | 1.634 | 1.618 |
|     | H16....O10'  | 1.842 | 1.849 | 1.738 | 1.714 |
|     | H16"....O8'  | 1.831 | 1.838 | 1.742 | 1.725 |
|     | H16'....O12" | 1.797 | 1.803 | 1.688 | 1.667 |
| 2-y | H17....O14   | 1.630 | 1.632 | 1.448 | 1.464 |
|     | H15'....O14' | 1.617 | 1.619 | 1.470 | 1.479 |
|     | H17"....O14" | 1.621 | 1.624 | 1.473 | 1.477 |
|     | H17'....O8   | 1.742 | 1.743 | 1.633 | 1.619 |
|     | H16....O10'  | 1.860 | 1.866 | 1.746 | 1.715 |
|     | H16"....O8'  | 1.845 | 1.852 | 1.746 | 1.731 |
|     | H16'....O12" | 1.818 | 1.826 | 1.707 | 1.676 |
| 3   | H17....O14   | 1.629 | 1.632 | 1.447 | 1.465 |
|     | H17'....O14' | 1.613 | 1.615 | 1.466 | 1.473 |
|     | H15"....O14" | 1.655 | 1.658 | 1.529 | 1.538 |
|     | H16'....O8   | 1.705 | 1.709 | 1.575 | 1.557 |
|     | H15....O12'  | 1.849 | 1.854 | 1.731 | 1.710 |
|     | H17"....O10' | 1.826 | 1.839 | 1.737 | 1.711 |
|     | H15'....O10" | 1.863 | 1.878 | 1.790 | 1.772 |
| 3-y | H17....O14   | 1.629 | 1.632 | 1.447 | 1.468 |
|     | H17'....O14' | 1.615 | 1.617 | 1.466 | 1.482 |
|     | H15"....O14" | 1.670 | 1.680 | 1.531 | 1.554 |
|     | H16'....O8   | 1.718 | 1.721 | 1.588 | 1.565 |
|     | H15....O12'  | 1.848 | 1.853 | 1.734 | 1.736 |
|     | H17"....O10' | 1.863 | 1.868 | 1.759 | 1.736 |
|     | H15'....O10" | 1.883 | 1.893 | 1.799 | 1.832 |
| 4   | H17....O14   | 1.629 | 1.632 | 1.447 | 1.464 |
|     | H15'....O14' | 1.613 | 1.616 | 1.467 | 1.477 |
|     | H15"....O14" | 1.654 | 1.657 | 1.528 | 1.536 |
|     | H17'....O8   | 1.738 | 1.741 | 1.632 | 1.617 |
|     | H16....O10'  | 1.844 | 1.852 | 1.749 | 1.726 |
|     | H17"....O8'  | 1.827 | 1.836 | 1.738 | 1.722 |
|     | H16'....O10" | 1.835 | 1.848 | 1.753 | 1.735 |
| 4-y | H17....O14   | 1.629 | 1.632 | 1.446 | 1.463 |
|     | H15'....O14' | 1.617 | 1.620 | 1.470 | 1.480 |
|     | H15"....O14" | 1.653 | 1.656 | 1.527 | 1.536 |
|     | H17'....O8   | 1.740 | 1.742 | 1.633 | 1.620 |
|     | H16....O10'  | 1.856 | 1.862 | 1.753 | 1.725 |
|     | H17"....O8'  | 1.852 | 1.860 | 1.748 | 1.736 |

|     |              |       |       |       |       |
|-----|--------------|-------|-------|-------|-------|
|     | H16'....O10" | 1.864 | 1.878 | 1.772 | 1.749 |
| 5   | H17....O14   | 1.627 | 1.630 | 1.439 | 1.458 |
|     | H17'....O14' | 1.680 | 1.688 | 1.528 | 1.543 |
|     | H15"....O14" | 1.666 | 1.668 | 1.545 | 1.557 |
|     | H16'....O8   | 1.693 | 1.694 | 1.561 | 1.545 |
|     | H16....O12'  | 1.892 | 1.898 | 1.798 | 1.777 |
|     | H17"....O10' | 1.856 | 1.860 | 1.780 | 1.755 |
|     | H16"....O8'  | 1.898 | 1.898 | 1.804 | 1.804 |
| 5-y | H17....O14   | 1.626 | 1.626 | 1.445 | 1.456 |
|     | H17'....O14' | 1.695 | 1.703 | 1.526 | 1.536 |
|     | H15"....O14" | 1.694 | 1.694 | 1.545 | 1.571 |
|     | H16'....O8   | 1.701 | 1.703 | 1.581 | 1.552 |
|     | H16....O12'  | 1.911 | 1.905 | 1.803 | 1.790 |
|     | H17"....O10' | 1.901 | 1.901 | 1.804 | 1.772 |
|     | H16"....O8'  | 1.956 | 1.935 | 1.788 | 1.785 |
| 6   | H17....O14   | 1.627 | 1.630 | 1.439 | 1.457 |
|     | H17'....O14' | 1.672 | 1.678 | 1.523 | 1.534 |
|     | H15"....O14" | 1.666 | 1.667 | 1.544 | 1.554 |
|     | H16'....O8   | 1.699 | 1.701 | 1.563 | 1.550 |
|     | H16....O12'  | 1.893 | 1.901 | 1.800 | 1.776 |
|     | H16"....O10' | 1.885 | 1.880 | 1.794 | 1.772 |
|     | H17"....O8'  | 1.867 | 1.866 | 1.784 | 1.766 |
| 6-y | H17....O14   | 1.630 | 1.629 | 1.436 | 1.467 |
|     | H17'....O14' | 1.679 | 1.687 | 1.522 | 1.532 |
|     | H15"....O14" | 1.664 | 1.667 | 1.543 | 1.552 |
|     | H16'....O8   | 1.695 | 1.703 | 1.563 | 1.539 |
|     | H16....O12'  | 1.910 | 1.907 | 1.810 | 1.823 |
|     | H16"....O10' | 1.899 | 1.898 | 1.803 | 1.781 |
|     | H17"....O8'  | 1.872 | 1.870 | 1.780 | 1.770 |
| 7   | H17....O14   | 1.624 | 1.626 | 1.423 | 1.442 |
|     | H15'....O14' | 1.623 | 1.625 | 1.481 | 1.490 |
|     | H15"....O14" | 1.666 | 1.670 | 1.541 | 1.551 |
|     | H17'....O8   | 1.794 | 1.793 | 1.675 | 1.667 |
|     | H16'....O10  | 1.948 | 1.946 | 1.856 | 1.844 |
|     | H17"....O8'  | 1.839 | 1.841 | 1.752 | 1.734 |
|     | H16"....O10' | 1.883 | 1.881 | 1.808 | 1.789 |
| 7-y | H17....O14   | 1.624 | 1.627 | 1.426 | 1.446 |
|     | H15'....O14' | 1.626 | 1.625 | 1.483 | 1.495 |
|     | H15"....O14" | 1.663 | 1.664 | 1.539 | 1.556 |
|     | H17'....O8   | 1.797 | 1.789 | 1.670 | 1.669 |
|     | H16'....O10  | 1.938 | 1.934 | 1.834 | 1.801 |
|     | H17"....O8'  | 1.859 | 1.851 | 1.762 | 1.749 |

|      |                |       |       |       |       |
|------|----------------|-------|-------|-------|-------|
|      | H16''....O10'  | 1.885 | 1.880 | 1.806 | 1.761 |
| 8    | H17....O14     | 1.624 | 1.626 | 1.423 | 1.442 |
|      | H15'....O14'   | 1.632 | 1.634 | 1.486 | 1.497 |
|      | H15''....O14'' | 1.671 | 1.674 | 1.550 | 1.561 |
|      | H17'....O8     | 1.792 | 1.791 | 1.676 | 1.669 |
|      | H16'....O10    | 1.946 | 1.943 | 1.853 | 1.839 |
|      | H17''....O8'   | 1.868 | 1.861 | 1.766 | 1.755 |
|      | H16''....O10'  | 1.858 | 1.860 | 1.794 | 1.769 |
| 8-y  | H17....O14     | 1.624 | 1.627 | 1.425 | 1.446 |
|      | H15'....O14'   | 1.635 | 1.637 | 1.487 | 1.504 |
|      | H15''....O14'' | 1.681 | 1.698 | 1.554 | 1.595 |
|      | H17'....O8     | 1.786 | 1.788 | 1.670 | 1.656 |
|      | H16'....O10    | 1.931 | 1.932 | 1.840 | 1.795 |
|      | H17''....O8'   | 1.901 | 1.905 | 1.773 | 1.799 |
|      | H16''....O10'  | 1.888 | 1.900 | 1.798 | 1.765 |
| 9    | H17....O14     | 1.622 | 1.624 | 1.418 | 1.437 |
|      | H17'....O14'   | 1.628 | 1.629 | 1.493 | 1.501 |
|      | H15''....O14'' | 1.666 | 1.669 | 1.543 | 1.553 |
|      | H16'....O8     | 1.866 | 1.765 | 1.630 | 1.621 |
|      | H16....O12'    | 1.877 | 1.878 | 1.902 | 1.883 |
|      | H17''....O10'  | 1.869 | 1.860 | 1.796 | 1.774 |
|      | H15'....O10''  | 1.842 | 1.845 | 1.767 | 1.749 |
| 9-y  | H17....O14     | 1.623 | 1.624 | 1.412 | 1.400 |
|      | H17'....O14'   | 1.629 | 1.632 | 1.491 | 1.499 |
|      | H15''....O14'' | 1.664 | 1.665 | 1.541 | 1.501 |
|      | H16'....O8     | 1.746 | 1.751 | 1.624 | 1.605 |
|      | H16....O12'    | 1.856 | 1.854 | 1.889 | 1.896 |
|      | H17''....O10'  | 1.917 | 1.907 | 1.808 | 1.809 |
|      | H15'....O10''  | 1.863 | 1.856 | 1.763 | 1.753 |
| 10   | H17....O14     | 1.622 | 1.624 | 1.417 | 1.438 |
|      | H15'....O14'   | 1.636 | 1.638 | 1.498 | 1.509 |
|      | H15''....O14'' | 1.668 | 1.669 | 1.547 | 1.557 |
|      | H16'....O8     | 1.762 | 1.759 | 1.627 | 1.615 |
|      | H17'....O10    | 1.979 | 1.979 | 1.902 | 1.882 |
|      | H17''....O10'  | 1.846 | 1.851 | 1.781 | 1.756 |
|      | H16''....O8'   | 1.875 | 1.873 | 1.787 | 1.779 |
| 10-y | H17....O14     | 1.622 | 1.624 | 1.408 | 1.445 |
|      | H15'....O14'   | 1.642 | 1.646 | 1.502 | 1.517 |
|      | H15''....O14'' | 1.686 | 1.690 | 1.556 | 1.559 |
|      | H16'....O8     | 1.767 | 1.767 | 1.640 | 1.625 |
|      | H17'....O10    | 1.989 | 1.985 | 1.898 | 1.947 |
|      | H17''....O10'  | 1.902 | 1.901 | 1.804 | 1.785 |

|                                       |                |       |       |       |       |
|---------------------------------------|----------------|-------|-------|-------|-------|
|                                       | H16''....O8'   | 1.932 | 1.922 | 1.807 | 1.815 |
| <b>structure T12-KT6''-M5,3'',3''</b> |                |       |       |       |       |
| 1                                     | H15....O14     | 1.624 | 1.628 | 1.481 | 1.488 |
|                                       | H15'....O14'   | 1.610 | 1.612 | 1.461 | 1.468 |
|                                       | H15''....O14'' | 1.630 | 1.633 | 1.449 | 1.465 |
|                                       | H17'....O8     | 1.827 | 1.836 | 1.735 | 1.715 |
|                                       | H16....O10'    | 1.829 | 1.839 | 1.741 | 1.718 |
|                                       | H16''....O8'   | 1.843 | 1.848 | 1.722 | 1.700 |
|                                       | H16'....O12''  | 1.711 | 1.714 | 1.584 | 1.567 |
| 1-y                                   | H15....O14     | 1.626 | 1.629 | 1.483 | 1.492 |
|                                       | H15'....O14'   | 1.611 | 1.613 | 1.460 | 1.473 |
|                                       | H15''....O14'' | 1.631 | 1.634 | 1.450 | 1.480 |
|                                       | H17'....O8     | 1.834 | 1.840 | 1.736 | 1.736 |
|                                       | H16....O10'    | 1.851 | 1.859 | 1.754 | 1.724 |
|                                       | H16''....O8'   | 1.848 | 1.849 | 1.725 | 1.729 |
|                                       | H16'....O12''  | 1.721 | 1.727 | 1.596 | 1.553 |
| 2                                     | H15....O14     | 1.616 | 1.620 | 1.467 | 1.473 |
|                                       | H17'....O14'   | 1.614 | 1.616 | 1.469 | 1.478 |
|                                       | H15''....O14'' | 1.630 | 1.633 | 1.449 | 1.466 |
|                                       | H16'....O8     | 1.796 | 1.802 | 1.687 | 1.666 |
|                                       | H16....O12'    | 1.831 | 1.838 | 1.742 | 1.725 |
|                                       | H16''....O10'  | 1.842 | 1.849 | 1.737 | 1.714 |
|                                       | H16'....O12''  | 1.739 | 1.742 | 1.635 | 1.619 |
| 2-y                                   | H15....O14     | 1.620 | 1.624 | 1.472 | 1.476 |
|                                       | H17'....O14'   | 1.617 | 1.619 | 1.470 | 1.479 |
|                                       | H15''....O14'' | 1.630 | 1.633 | 1.449 | 1.465 |
|                                       | H16'....O8     | 1.818 | 1.826 | 1.706 | 1.674 |
|                                       | H16....O12'    | 1.845 | 1.852 | 1.747 | 1.731 |
|                                       | H16''....O10'  | 1.860 | 1.866 | 1.746 | 1.715 |
|                                       | H16'....O12''  | 1.742 | 1.744 | 1.634 | 1.620 |
| 3                                     | H17....O14     | 1.654 | 1.658 | 1.529 | 1.538 |
|                                       | H15'....O14'   | 1.613 | 1.615 | 1.466 | 1.473 |
|                                       | H15''....O14'' | 1.630 | 1.633 | 1.447 | 1.465 |
|                                       | H15....O10'    | 1.827 | 1.839 | 1.737 | 1.711 |
|                                       | H17'....O10    | 1.863 | 1.879 | 1.790 | 1.772 |
|                                       | H16'....O12''  | 1.706 | 1.710 | 1.575 | 1.557 |
|                                       | H16''....O8'   | 1.848 | 1.854 | 1.730 | 1.710 |
| 3-y                                   | H17....O14     | 1.656 | 1.666 | 1.528 | 1.552 |
|                                       | H15'....O14'   | 1.615 | 1.617 | 1.467 | 1.476 |
|                                       | H15''....O14'' | 1.635 | 1.638 | 1.451 | 1.464 |
|                                       | H15....O10'    | 1.878 | 1.882 | 1.774 | 1.737 |



|     |              |       |       |       |       |
|-----|--------------|-------|-------|-------|-------|
|     | H17'....O10  | 1.891 | 1.901 | 1.801 | 1.816 |
|     | H16'....O12" | 1.722 | 1.725 | 1.594 | 1.566 |
|     | H16"....O8'  | 1.847 | 1.852 | 1.734 | 1.717 |
| 4   | H17....O14   | 1.654 | 1.658 | 1.527 | 1.536 |
|     | H17'....O14' | 1.613 | 1.616 | 1.468 | 1.477 |
|     | H15"....O14" | 1.630 | 1.633 | 1.447 | 1.464 |
|     | H15....O12'  | 1.827 | 1.837 | 1.739 | 1.722 |
|     | H17'....O10  | 1.835 | 1.848 | 1.753 | 1.736 |
|     | H15'....O12" | 1.738 | 1.741 | 1.632 | 1.617 |
|     | H16"....O10' | 1.844 | 1.852 | 1.749 | 1.726 |
|     |              |       |       |       |       |
| 4-y | H17....O14   | 1.653 | 1.656 | 1.527 | 1.536 |
|     | H17'....O14' | 1.618 | 1.620 | 1.470 | 1.480 |
|     | H15"....O14" | 1.630 | 1.633 | 1.447 | 1.464 |
|     | H15....O12'  | 1.852 | 1.860 | 1.748 | 1.737 |
|     | H17'....O10  | 1.864 | 1.878 | 1.772 | 1.750 |
|     | H15'....O12" | 1.740 | 1.742 | 1.634 | 1.620 |
|     | H16"....O10' | 1.856 | 1.862 | 1.753 | 1.725 |
|     |              |       |       |       |       |
| 5   | H17....O14   | 1.666 | 1.667 | 1.545 | 1.557 |
|     | H15'....O14' | 1.680 | 1.689 | 1.528 | 1.543 |
|     | H15"....O14" | 1.627 | 1.630 | 1.440 | 1.459 |
|     | H15....O10'  | 1.856 | 1.859 | 1.780 | 1.754 |
|     | H16....O12'  | 1.898 | 1.897 | 1.804 | 1.803 |
|     | H16'....O12" | 1.694 | 1.695 | 1.561 | 1.546 |
|     | H16"....O8'  | 1.891 | 1.898 | 1.799 | 1.778 |
|     |              |       |       |       |       |
| 5-y | H17....O14   | 1.704 | 1.705 | 1.544 | 1.577 |
|     | H15'....O14' | 1.695 | 1.703 | 1.525 | 1.537 |
|     | H15"....O14" | 1.627 | 1.627 | 1.446 | 1.456 |
|     | H15....O10'  | 1.899 | 1.897 | 1.802 | 1.772 |
|     | H16....O12'  | 1.957 | 1.934 | 1.786 | 1.790 |
|     | H16'....O12" | 1.698 | 1.701 | 1.580 | 1.555 |
|     | H16"....O8'  | 1.912 | 1.905 | 1.805 | 1.790 |
|     |              |       |       |       |       |
| 6   | H17....O14   | 1.665 | 1.667 | 1.544 | 1.554 |
|     | H15'....O14' | 1.672 | 1.678 | 1.523 | 1.535 |
|     | H15"....O14" | 1.627 | 1.631 | 1.440 | 1.457 |
|     | H15....O12'  | 1.868 | 1.866 | 1.784 | 1.766 |
|     | H16....O10'  | 1.885 | 1.880 | 1.794 | 1.772 |
|     | H16"....O8'  | 1.893 | 1.900 | 1.800 | 1.776 |
|     | H16'....O12" | 1.700 | 1.701 | 1.564 | 1.551 |
|     |              |       |       |       |       |
| 6-y | H17....O14   | 1.664 | 1.666 | 1.542 | 1.551 |
|     | H15'....O14' | 1.679 | 1.687 | 1.522 | 1.533 |
|     | H15"....O14" | 1.631 | 1.630 | 1.437 | 1.464 |
|     | H15....O12'  | 1.872 | 1.870 | 1.781 | 1.772 |

|     |                |       |       |       |       |
|-----|----------------|-------|-------|-------|-------|
|     | H16....O10'    | 1.899 | 1.898 | 1.801 | 1.778 |
|     | H16''....O8'   | 1.909 | 1.907 | 1.810 | 1.822 |
|     | H16'....O12''  | 1.695 | 1.704 | 1.564 | 1.538 |
| 7   | H17....O14     | 1.666 | 1.670 | 1.541 | 1.551 |
|     | H17'....O14'   | 1.623 | 1.625 | 1.481 | 1.490 |
|     | H15''....O14'' | 1.624 | 1.627 | 1.424 | 1.443 |
|     | H15....O12'    | 1.839 | 1.841 | 1.752 | 1.734 |
|     | H16....O10'    | 1.883 | 1.881 | 1.807 | 1.789 |
|     | H15'....O12''  | 1.794 | 1.794 | 1.677 | 1.669 |
|     | H16''....O10'  | 1.948 | 1.946 | 1.856 | 1.843 |
|     |                |       |       |       |       |
| 7-y | H17....O14     | 1.663 | 1.664 | 1.538 | 1.555 |
|     | H17'....O14'   | 1.626 | 1.625 | 1.483 | 1.495 |
|     | H15''....O14'' | 1.625 | 1.627 | 1.426 | 1.447 |
|     | H15....O12'    | 1.859 | 1.852 | 1.762 | 1.749 |
|     | H16....O10'    | 1.885 | 1.880 | 1.807 | 1.761 |
|     | H15'....O12''  | 1.797 | 1.790 | 1.670 | 1.669 |
|     | H16''....O10'  | 1.938 | 1.934 | 1.836 | 1.801 |
|     |                |       |       |       |       |
| 8   | H17....O14     | 1.671 | 1.674 | 1.550 | 1.561 |
|     | H17'....O14'   | 1.632 | 1.634 | 1.486 | 1.497 |
|     | H15''....O14'' | 1.624 | 1.627 | 1.424 | 1.443 |
|     | H15....O10'    | 1.858 | 1.860 | 1.794 | 1.768 |
|     | H16....O12'    | 1.868 | 1.861 | 1.766 | 1.755 |
|     | H16'....O10''  | 1.946 | 1.943 | 1.853 | 1.838 |
|     | H15'....O12''  | 1.792 | 1.792 | 1.676 | 1.668 |
|     |                |       |       |       |       |
| 8-y | H17....O14     | 1.681 | 1.700 | 1.553 | 1.601 |
|     | H17'....O14'   | 1.635 | 1.637 | 1.487 | 1.504 |
|     | H15''....O14'' | 1.625 | 1.627 | 1.425 | 1.447 |
|     | H15....O10'    | 1.888 | 1.900 | 1.796 | 1.769 |
|     | H16....O12'    | 1.901 | 1.906 | 1.772 | 1.804 |
|     | H16'....O10''  | 1.931 | 1.932 | 1.840 | 1.797 |
|     | H15'....O12''  | 1.787 | 1.788 | 1.670 | 1.655 |
|     |                |       |       |       |       |
| 9   | H17....O14     | 1.666 | 1.669 | 1.543 | 1.553 |
|     | H17'....O14'   | 1.628 | 1.630 | 1.493 | 1.501 |
|     | H15''....O14'' | 1.622 | 1.625 | 1.419 | 1.438 |
|     | H15....O12'    | 1.842 | 1.846 | 1.767 | 1.749 |
|     | H16....O10'    | 1.870 | 1.870 | 1.795 | 1.774 |
|     | H15'....O10''  | 1.977 | 1.978 | 1.902 | 1.883 |
|     | H16'....O12''  | 1.767 | 1.765 | 1.630 | 1.622 |
|     |                |       |       |       |       |
| 9-y | H17....O14     | 1.663 | 1.665 | 1.540 | 1.550 |
|     | H17'....O14'   | 1.629 | 1.632 | 1.491 | 1.500 |
|     | H15''....O14'' | 1.624 | 1.625 | 1.413 | 1.438 |
|     | H15....O12'    | 1.863 | 1.856 | 1.763 | 1.755 |

|                                     |                |       |       |       |       |
|-------------------------------------|----------------|-------|-------|-------|-------|
|                                     | H16....O10'    | 1.917 | 1.907 | 1.809 | 1.804 |
|                                     | H15'....O10''  | 1.956 | 1.953 | 1.889 | 1.894 |
|                                     | H16'....O12''  | 1.746 | 1.751 | 1.623 | 1.604 |
| 10                                  | H17....O14     | 1.668 | 1.669 | 1.547 | 1.557 |
|                                     | H17'....O14'   | 1.636 | 1.638 | 1.498 | 1.509 |
|                                     | H15''....O14'' | 1.622 | 1.625 | 1.419 | 1.438 |
|                                     | H15....O10'    | 1.847 | 1.852 | 1.781 | 1.756 |
|                                     | H16....O12'    | 1.875 | 1.873 | 1.787 | 1.778 |
|                                     | H16'....O12''  | 1.762 | 1.760 | 1.628 | 1.616 |
|                                     | H15'....O10''  | 1.980 | 1.979 | 1.903 | 1.884 |
| 10-y                                | H17....O14     | 1.700 | 1.706 | 1.556 | 1.568 |
|                                     | H17'....O14'   | 1.642 | 1.645 | 1.499 | 1.516 |
|                                     | H15''....O14'' | 1.617 | 1.621 | 1.411 | 1.425 |
|                                     | H15....O10'    | 1.898 | 1.899 | 1.799 | 1.772 |
|                                     | H16....O12'    | 1.931 | 1.920 | 1.791 | 1.815 |
|                                     | H16'....O12''  | 1.757 | 1.759 | 1.632 | 1.612 |
|                                     | H15'....O10''  | 1.969 | 1.971 | 1.882 | 1.900 |
| <b>structure T13-ET6,2''</b>        |                |       |       |       |       |
| 1                                   | H15....O14     | 1.625 | 1.637 | 1.448 | 1.458 |
|                                     | H15'....O14'   | 1.616 | 1.618 | 1.472 | 1.481 |
|                                     | H17''....O14'' | 1.608 | 1.610 | 1.457 | 1.465 |
|                                     | H17'....O8     | 1.841 | 1.850 | 1.740 | 1.722 |
|                                     | H16....O10'    | 1.858 | 1.868 | 1.770 | 1.750 |
|                                     | H16''....O8'   | 1.852 | 1.857 | 1.759 | 1.742 |
|                                     | H16'....O12''  | 1.811 | 1.818 | 1.703 | 1.684 |
| 1-y                                 | H15....O14     | 1.625 | 1.638 | 1.448 | 1.459 |
|                                     | H15'....O14'   | 1.618 | 1.621 | 1.473 | 1.482 |
|                                     | H17''....O14'' | 1.611 | 1.614 | 1.461 | 1.468 |
|                                     | H17'....O8     | 1.842 | 1.851 | 1.740 | 1.725 |
|                                     | H16....O10'    | 1.871 | 1.881 | 1.781 | 1.761 |
|                                     | H16''....O8'   | 1.864 | 1.870 | 1.764 | 1.749 |
|                                     | H16'....O12''  | 1.832 | 1.841 | 1.720 | 1.695 |
| <b>structure T13-M5,3''-ET6,2''</b> |                |       |       |       |       |
| 1                                   | H15....O14     | 1.709 | 1.728 | 1.470 | 1.483 |
|                                     | H15'....O14'   | 1.614 | 1.617 | 1.469 | 1.478 |
|                                     | H17''....O14'' | 1.652 | 1.659 | 1.475 | 1.485 |
|                                     | H17'....O8     | 1.835 | 1.844 | 1.728 | 1.713 |
|                                     | H16....O10'    | 1.852 | 1.863 | 1.760 | 1.742 |
|                                     | H16''....O8'   | 1.844 | 1.850 | 1.748 | 1.733 |

|                                   |              |       |       |       |       |
|-----------------------------------|--------------|-------|-------|-------|-------|
|                                   | H16'....O12" | 1.799 | 1.807 | 1.691 | 1.675 |
| 1-y                               | H15....O14   | 1.710 | 1.729 | 1.471 | 1.485 |
|                                   | H15'....O14' | 1.618 | 1.621 | 1.470 | 1.480 |
|                                   | H17"....O14" | 1.657 | 1.665 | 1.479 | 1.488 |
|                                   | H17'....O8   | 1.837 | 1.848 | 1.729 | 1.719 |
|                                   | H16....O10'  | 1.864 | 1.876 | 1.771 | 1.750 |
|                                   | H16"....O8'  | 1.860 | 1.867 | 1.753 | 1.742 |
|                                   | H16'....O12" | 1.820 | 1.829 | 1.707 | 1.683 |
| <b>structure T14-ET6,2"</b>       |              |       |       |       |       |
| 1                                 | H15....O14   | 1.725 | 1.717 | 1.445 | 1.458 |
|                                   | H15'....O14' | 1.633 | 1.647 | 1.453 | 1.463 |
|                                   | H17"....O14" | 1.712 | 1.605 | 1.436 | 1.446 |
|                                   | H17'....O8   | 1.835 | 1.852 | 1.735 | 1.717 |
|                                   | H16....O10'  | 1.855 | 1.872 | 1.770 | 1.749 |
|                                   | H16"....O8'  | 1.853 | 1.859 | 1.755 | 1.738 |
|                                   | H16'....O12" | 1.810 | 1.819 | 1.699 | 1.680 |
| 1-y                               | H15....O14   | 1.725 | 1.637 | 1.447 | 1.458 |
|                                   | H15'....O14' | 1.616 | 1.631 | 1.454 | 1.467 |
|                                   | H17"....O14" | 1.600 | 1.607 | 1.440 | 1.468 |
|                                   | H17'....O8   | 1.834 | 1.845 | 1.735 | 1.720 |
|                                   | H16....O10'  | 1.867 | 1.878 | 1.778 | 1.760 |
|                                   | H16"....O8'  | 1.865 | 1.872 | 1.759 | 1.746 |
|                                   | H16'....O12" | 1.833 | 1.843 | 1.716 | 1.690 |
| <b>structure T14-M5,3"-ET6,2"</b> |              |       |       |       |       |
| 1-y                               | H15....O14   | 1.710 | 1.729 | 1.470 | 1.492 |
|                                   | H15'....O14' | 1.619 | 1.634 | 1.451 | 1.468 |
|                                   | H17"....O14" | 1.658 | 1.664 | 1.464 | 1.485 |
|                                   | H17'....O8   | 1.832 | 1.842 | 1.725 | 1.728 |
|                                   | H16....O10'  | 1.861 | 1.872 | 1.768 | 1.748 |
|                                   | H16"....O8'  | 1.865 | 1.872 | 1.750 | 1.755 |
|                                   | H16'....O12" | 1.820 | 1.829 | 1.703 | 1.677 |
| 1                                 | H15....O14   | 1.709 | 1.727 | 1.469 | 1.487 |
|                                   | H15'....O14' | 1.635 | 1.647 | 1.451 | 1.464 |
|                                   | H17"....O14" | 1.701 | 1.717 | 1.464 | 1.482 |
|                                   | H17'....O8   | 1.829 | 1.839 | 1.723 | 1.709 |
|                                   | H16....O10'  | 1.848 | 1.859 | 1.758 | 1.743 |
|                                   | H16"....O8'  | 1.845 | 1.854 | 1.745 | 1.732 |
|                                   | H16'....O12" | 1.801 | 1.811 | 1.691 | 1.676 |
| 1-y-out-in                        | H15....O14   | 1.710 | 1.728 | 1.470 | 1.485 |

|  |              |       |       |       |       |
|--|--------------|-------|-------|-------|-------|
|  | H15'....O14' | 1.621 | 1.636 | 1.453 | 1.466 |
|  | H17"....O14" | 1.695 | 1.709 | 1.467 | 1.477 |
|  | H17'....O8   | 1.830 | 1.841 | 1.725 | 1.714 |
|  | H16....O10'  | 1.862 | 1.874 | 1.768 | 1.750 |
|  | H16"....O8'  | 1.871 | 1.878 | 1.757 | 1.744 |
|  | H16'....O12" | 1.838 | 1.847 | 1.712 | 1.687 |

**Table S 13****Effect of the inclusion of Grimme's dispersion correction on the estimation of the length of the intramolecular hydrogen bonds in the calculated trimeric acylphloroglucinols**

The table reports the difference in the estimations of the length of the IHBs, taken as «length in the DFT/B3LYP/6-31+G(d,p) result comprising Grimme's correction minus length in the DFT/B3LYP/6-31+G(d,p) result without Grimme's correction»; consequently, a negative value indicates length shortening and a positive value indicates length increase, caused by the Grimme's correction.

| molecule | conformer | hydrogen bond  | IHB length difference                |                                          |
|----------|-----------|----------------|--------------------------------------|------------------------------------------|
|          |           |                | conformer with outstretched geometry | conformer with half-bowl-shaped geometry |
| T1       | 1         | H15....O14     | 0.007                                | 0.007                                    |
|          |           | H17'....O14'   | 0.009                                | 0.009                                    |
|          |           | H17''....O14'' | 0.008                                | 0.010                                    |
|          |           | H16'....O8     | -0.020                               | -0.024                                   |
|          |           | H16....O12'    | -0.017                               | -0.015                                   |
|          |           | H16''....O10'  | -0.021                               | -0.021                                   |
|          |           | H15'....O12''  | -0.017                               | -0.015                                   |
|          | 2         | H15....O14     | 0.008                                | 0.003                                    |
|          |           | H17'....O14'   | 0.009                                | 0.012                                    |
|          |           | H15''....O14'' | 0.011                                | 0.016                                    |
|          |           | H16'....O8     | -0.019                               | -0.039                                   |
|          |           | H16....O12'    | -0.017                               | -0.009                                   |
|          |           | H17''....O10'  | -0.021                               | -0.040                                   |
|          |           | H15'....O10''  | -0.013                               | 0.005                                    |
|          | 3         | H15....O14     | 0.009                                | 0.009                                    |
|          |           | H15'....O14'   | 0.010                                | 0.010                                    |
|          |           | H15''....O14'' | 0.011                                | 0.011                                    |
|          |           | H17'....O8     | -0.016                               | -0.015                                   |
|          |           | H16....O10'    | -0.020                               | -0.020                                   |
|          |           | H17''....O8'   | -0.016                               | -0.016                                   |
|          |           | H16'....O10''  | -0.016                               | -0.020                                   |
|          | 4         | H15....O14     | 0.010                                | 0.009                                    |
|          |           | H17'....O14'   | 0.008                                | 0.009                                    |
|          |           | H17''....O14'' | 0.009                                | 0.010                                    |
|          |           | H10'....O8     | -0.019                               | -0.024                                   |
|          |           | H16....O12'    | -0.017                               | -0.015                                   |

|  |    |                |        |        |
|--|----|----------------|--------|--------|
|  |    | H16''....O10'  | -0.020 | -0.019 |
|  |    | H15'....O12''  | -0.017 | -0.014 |
|  | 5  | H15....O14     | 0.009  | 0.009  |
|  |    | H17'....O14'   | 0.009  | 0.017  |
|  |    | H15''....O14'' | 0.011  | 0.025  |
|  |    | H16'....O8     | 0.081  | -0.034 |
|  |    | H16....O12'    | -0.017 | 0.008  |
|  |    | H16''....O10'  | -0.020 | -0.041 |
|  |    | H15'....O10''  | -0.014 | 0.032  |
|  | 6  | H17....O14     | 0.011  | 0.011  |
|  |    | H15'....O14'   | 0.010  | 0.011  |
|  |    | H15''....O14'' | 0.011  | 0.011  |
|  |    | H15....O10'    | -0.020 | -0.021 |
|  |    | H17'....O10    | -0.012 | -0.006 |
|  |    | H16'....O10''  | -0.015 | -0.020 |
|  |    | H17''....O8'   | -0.016 | -0.012 |
|  | 7  | H15....O14     | 0.011  | 0.010  |
|  |    | H15'....O14'   | 0.009  | 0.009  |
|  |    | H15''....O14'' | 0.011  | 0.012  |
|  |    | H17'....O8     | -0.017 | -0.015 |
|  |    | H16....O10'    | -0.019 | -0.019 |
|  |    | H17''....O8'   | -0.016 | -0.016 |
|  |    | H16'....O10''  | -0.016 | -0.020 |
|  | 8  | H17....O14     |        | 0.036  |
|  |    | H15'....O14'   |        | 0.007  |
|  |    | H17''....O14'' |        | 0.013  |
|  |    | H16'....O8     |        | -0.024 |
|  |    | H16....O10'    |        | -0.015 |
|  |    | H16''....O10'  |        | -0.015 |
|  |    | H15'....O12''  |        | -0.012 |
|  | 9  | H15....O14     | 0.009  | 1.493  |
|  |    | H17'....O14'   | 0.009  | 1.476  |
|  |    | H17''....O14'' | 0.010  | 1.502  |
|  |    | H16'....O8     | -0.020 | 1.716  |
|  |    | H16....O12'    | -0.017 | 1.761  |
|  |    | H16''....O10'  | -0.021 | 1.773  |
|  |    | H15'....O12''  | -0.016 | 1.756  |
|  | 10 | H15....O14     | 0.009  | 0.009  |
|  |    | H15'....O14'   | 0.011  | 0.011  |
|  |    | H15''....O14'' | 0.014  | 0.035  |
|  |    | H17'....O8     | -0.017 | -0.011 |
|  |    | H16....O10'    | -0.021 | -0.030 |

|  |    |                |        |        |
|--|----|----------------|--------|--------|
|  |    | H17''....O8'   | -0.011 | -0.005 |
|  |    | H16'....O12''  | -0.019 | -0.036 |
|  | 11 | H15....O14     | 0.008  | 0.011  |
|  |    | H15'....O14'   | 0.009  | 0.009  |
|  |    | H15''....O14'' | 0.012  | 0.011  |
|  |    | H17'....O8     | -0.017 | -0.012 |
|  |    | H16'....O10    | -0.015 | -0.027 |
|  |    | H17''....O8'   | -0.019 | -0.016 |
|  |    | H16''....O10'  | -0.021 | -0.022 |
|  | 12 | H15....O14     | 0.008  | 0.002  |
|  |    | H17'....O14'   | 0.011  | 0.014  |
|  |    | H15''....O14'' | 0.012  | 0.011  |
|  |    | H16'....O8     | -0.017 | -0.045 |
|  |    | H16....O12'    | -0.018 | 0.001  |
|  |    | H17''....O10'  | -0.019 | -0.029 |
|  |    | H16''....O8'   | -0.008 | 0.018  |
|  | 13 | H17....O14     | 0.011  | 0.011  |
|  |    | H17'....O14'   | 0.010  | 0.010  |
|  |    | H15''....O14'' | 0.015  | 0.015  |
|  |    | H15....O12'    | -0.017 | -0.018 |
|  |    | H16'....O10    | -0.014 | -0.019 |
|  |    | H15'....O12''  | -0.016 | -0.015 |
|  |    | H16''....O10'  | -0.016 | -0.015 |
|  | 14 | H17....O14     | 0.009  | 0.008  |
|  |    | H15'....O14'   | 0.010  | 0.010  |
|  |    | H17''....O14'' | 0.015  | 0.013  |
|  |    | H16'....O8     | -0.017 | -0.023 |
|  |    | H16....O12'    | -0.017 | -0.015 |
|  |    | H16''....O10'  | -0.016 | -0.014 |
|  |    | H15'....O12''  | -0.017 | -0.012 |
|  | 15 | H15....O14     | 0.008  | 0.008  |
|  |    | H15'....O14'   | 0.010  | 0.009  |
|  |    | H15''....O14'' | 0.013  | 0.015  |
|  |    | H17'....O8     | -0.018 | -0.015 |
|  |    | H16....O10'    | -0.017 | -0.030 |
|  |    | H16''....O8'   | -0.014 | -0.012 |
|  |    | H17''....O10'  | -0.025 | -0.032 |
|  | 16 | H15....O14     | 0.011  | 0.010  |
|  |    | H15'....O14'   | -0.010 | 0.011  |
|  |    | H15''....O14'' | 0.015  | 0.026  |
|  |    | H17'....O8     | -0.016 | -0.011 |
|  |    | H16....O10'    | -0.020 | -0.031 |



|  |    |                |        |        |
|--|----|----------------|--------|--------|
|  |    | H16''....O8'   | -0.011 | -0.005 |
|  |    | H17'....O10''  | -0.020 | -0.036 |
|  | 17 | H17....O14     | 0.008  | 0.007  |
|  |    | H17'....O14'   | 0.008  | 0.009  |
|  |    | H17''....O14'' | 0.011  | 0.012  |
|  |    | H16'....O8     | -0.018 | -0.022 |
|  |    | H17'....O10    | -0.021 | -0.017 |
|  |    | H16''....O10'  | -0.022 | -0.020 |
|  |    | H17''....O8'   | -0.018 | -0.016 |
|  | 18 | H15....O14     | 0.007  | 0.001  |
|  |    | H15'....O14'   | 0.010  | 0.014  |
|  |    | H15''....O14'' | 0.012  | 0.012  |
|  |    | H16'....O8     | -0.019 | -0.045 |
|  |    | H17'....O10    | -0.020 | -0.004 |
|  |    | H17''....O10'  | -0.026 | -0.037 |
|  |    | H16''....O8'   | -0.013 | 0.004  |
|  | 19 | H15....O14     | 0.009  | 0.010  |
|  |    | H15'....O14'   | 0.009  | 0.008  |
|  |    | H15''....O14'' | 0.012  | 0.011  |
|  |    | H17'....O8     | -0.018 | -0.015 |
|  |    | H16'....O10    | -0.015 | -0.026 |
|  |    | H17''....O8'   | -0.019 | -0.017 |
|  |    | H16''....O10'  | -0.020 | -0.020 |
|  | 20 | H17....O14     | 0.009  | 0.008  |
|  |    | H17'....O14'   | 0.009  | 0.009  |
|  |    | H17''....O14'' | 0.011  | 0.011  |
|  |    | H16'....O8     | -0.018 | -0.022 |
|  |    | H17'....O10    | -0.021 | -0.018 |
|  |    | H16''....O10'  | -0.021 | -0.020 |
|  |    | H17''....O8'   | -0.019 | -0.016 |
|  | 21 | H15....O14     | 0.009  | 0.010  |
|  |    | H15'....O14'   | 0.010  | 0.009  |
|  |    | H15''....O14'' | 0.012  | 0.013  |
|  |    | H17'....O8     | -0.018 | -0.016 |
|  |    | H16'....O10    | -0.017 | -0.028 |
|  |    | H16''....O8'   | -0.014 | -0.013 |
|  |    | H17'....O10''  | -0.025 | -0.030 |
|  | 22 | H15....O14     | 0.008  | -0.003 |
|  |    | H15'....O14'   | 0.010  | 0.034  |
|  |    | H15''....O14'' | 0.012  | 0.011  |
|  |    | H16'....O8     | -0.019 | -0.052 |
|  |    | H17'....O10    | -0.021 | 0.018  |

|  |    |                |        |        |
|--|----|----------------|--------|--------|
|  |    | H17''....O10'  | -0.026 | -0.054 |
|  |    | H16''....O8'   | -0.013 | 0.097  |
|  | 23 | H15....O14     | 0.009  | 0.009  |
|  |    | H17'....O14'   | 0.011  | 0.027  |
|  |    | H15''....O14'' | 0.012  | 0.010  |
|  |    | H16'....O8     | -0.017 | -0.052 |
|  |    | H16....O12'    | -0.017 | 0.030  |
|  |    | H17''....O10'  | -0.019 | 0.057  |
|  |    | H16''....O8'   | -0.007 | 0.115  |
|  |    |                |        |        |
|  | 24 | H17....O14     | 0.009  | 0.008  |
|  |    | H15'....O14'   | 0.010  | 0.012  |
|  |    | H17''....O14'' | 0.011  | 0.011  |
|  |    | H16'....O8     | -0.017 | -0.024 |
|  |    | H16....O12'    | -0.017 | -0.016 |
|  |    | H16''....O10'  | -0.018 | -0.015 |
|  |    | H17''....O8'   | -0.016 | -0.010 |
|  |    |                |        |        |
|  | 25 | H17....O14     | 0.014  | 0.001  |
|  |    | H15'....O14'   | 0.009  | 0.009  |
|  |    | H15''....O14'' | 0.012  | 0.013  |
|  |    | H16'....O8     | -0.013 | -0.004 |
|  |    | H17'....O10    | -0.012 | 0.063  |
|  |    | H16''....O10'  | -0.021 | 0.025  |
|  |    | H17''....O8'   | -0.019 | -0.002 |
|  | 26 | H17....O14     | 0.012  | 0.025  |
|  |    | H15'....O14'   | 0.012  | 0.011  |
|  |    | H15''....O14'' | 0.012  | 0.000  |
|  |    | H15....O12'    | -0.015 | -0.042 |
|  |    | H16'....O10    | -0.009 | 0.037  |
|  |    | H16''....O8'   | -0.012 | -0.065 |
|  |    | H17''....O10'  | -0.023 | 0.001  |
|  |    |                |        |        |
|  | 27 | H17....O14     | -0.011 | -0.013 |
|  |    | H15'....O14'   | 0.009  | 0.008  |
|  |    | H15''....O14'' | 0.036  | 0.039  |
|  |    | H17'....O8     | -0.054 | -0.053 |
|  |    | H16'....O10    | 0.021  | 0.031  |
|  |    | H17''....O8'   | 0.015  | 0.033  |
|  |    | H16''....O10'  | -0.057 | -0.061 |
|  |    |                |        |        |
|  | 28 | H17....O14     | 0.015  | 0.008  |
|  |    | H15'....O14'   | 0.011  | 0.029  |
|  |    | H15''....O14'' | 0.012  | 0.018  |
|  |    | H16'....O8     | -0.014 | 0.026  |
|  |    | H17'....O10    | -0.011 | 0.092  |

|                         |    |                |        |        |
|-------------------------|----|----------------|--------|--------|
|                         | 29 | H16''....O8'   | -0.026 | -0.063 |
|                         |    | H17'....O10''  | -0.013 | 0.074  |
|                         |    | H17....O14     |        | 0.015  |
|                         |    | H15'....O14'   |        | 0.110  |
|                         |    | H15''....O14'' |        | 0.014  |
|                         |    | H17'....O8     |        | -0.011 |
|                         |    | H16'....O10    |        | -0.022 |
|                         |    | H16''....O8'   |        | -0.013 |
|                         |    | H17'....O10''  |        | -0.027 |
|                         |    |                |        |        |
| T2-KT2,6''-M5,5,3'',3'' | 1  | H17....O14     | 0.018  | 0.018  |
|                         |    | H15'....O14'   | 0.008  | 0.008  |
|                         |    | H15''....O14'' | 0.018  | 0.019  |
|                         |    | H17'....O8     | -0.015 | -0.013 |
|                         |    | H16....O10'    | -0.024 | -0.033 |
|                         |    | H16''....O8'   | -0.021 | -0.018 |
|                         |    | H16'....O12''  | -0.018 | -0.029 |
|                         |    | H15....O14     | 0.009  | 0.008  |
| T3-ET6,2''              | 1  | H15'....O14'   | 0.012  | 0.018  |
|                         |    | H17''....O14'' | 0.009  | 0.008  |
|                         |    | H17'....O8     | -0.019 | -0.022 |
|                         |    | H16....O10'    | -0.020 | -0.013 |
|                         |    | H16''....O8'   | -0.017 | -0.017 |
|                         |    | H16'....O12''  | 0.081  | -0.025 |
|                         |    |                |        |        |
| T3-M5,3''-ET6,2''       | 1  | H15....O14     | 0.011  | 0.013  |
|                         |    | H15'....O14'   | 0.011  | 0.012  |
|                         |    | H17''....O14'' | 0.012  | 0.011  |
|                         |    | H17'....O8     | 0.040  | -0.014 |
|                         |    | H16....O10'    | -0.019 | -0.020 |
|                         |    | H16''....O8'   | -0.017 | -0.013 |
|                         |    | H16'....O12''  | -0.018 | -0.022 |
|                         |    |                |        |        |
| T4-KT2,6''-M5,5,3'',3'' | 1  | H17....O14     | 0.016  | 0.016  |
|                         |    | H15'....O14'   | 0.008  | 0.009  |
|                         |    | H15''....O14'' | 0.018  | 0.019  |
|                         |    | H17'....O8     | 0.000  | -0.013 |
|                         |    | H16....O10'    | -0.025 | -0.032 |
|                         |    | H16''....O8'   | -0.021 | -0.018 |
|                         |    | H16'....O12''  | -0.018 | -0.029 |
|                         |    |                |        |        |
| T5-KT6''-M3'',3''-ET4   | 1  | H17....O14     | 0.011  | 0.010  |

|                         |            |                |        |        |
|-------------------------|------------|----------------|--------|--------|
|                         |            | H17'....O14'   | 0.009  | 0.010  |
|                         |            | H15''....O14'' | 0.017  | 0.017  |
|                         |            | H15....O12'    | -0.015 | -0.017 |
|                         |            | H16'....O10    | -0.031 | -0.046 |
|                         |            | H15'....O12''  | -0.014 | -0.011 |
|                         |            | H16''....O10'  | -0.027 | -0.037 |
|                         |            |                |        |        |
| T5-KT2,6''-M5,5,3'',3'' | 1          | H17....O14     | 0.016  | 0.015  |
|                         |            | H15'....O14'   | 0.008  | 0.010  |
|                         |            | H15''....O14'' | 0.017  | 0.023  |
|                         |            | H17'....O8     | -0.015 | -0.009 |
|                         |            | H16....O10'    | -0.024 | -0.040 |
|                         |            | H16''....O8'   | -0.021 | -0.008 |
|                         |            | H16'....O12''  | -0.018 | -0.037 |
|                         |            |                |        |        |
| T6-M5,3''-ET6,4''       | 1          | H15....O14     | 0.004  | 0.011  |
|                         |            | H15'....O14'   | -0.008 | 0.010  |
|                         |            | H15''....O14'' | -0.007 | 0.010  |
|                         |            | H17'....O8     | 0.011  | -0.012 |
|                         |            | H16....O10'    | -0.015 | -0.022 |
|                         |            | H17''....O8'   | -0.044 | -0.018 |
|                         |            | H16'....O10''  | -0.158 | -0.030 |
|                         | 1-y-in-out | H15....O14     |        | 0.011  |
|                         |            | H15'....O14'   |        | 0.009  |
|                         |            | H15''....O14'' |        | 0.011  |
|                         |            | H17'....O8     |        | -0.014 |
|                         |            | H16....O10'    |        | -0.024 |
|                         |            | H17''....O8'   |        | -0.019 |
|                         |            | H16'....O10''  |        | -0.031 |
|                         | 1-y-in-in  | H15....O14     |        | 0.008  |
|                         |            | H15'....O14'   |        | 0.015  |
|                         |            | H15''....O14'' |        | 0.013  |
|                         |            | H17'....O8     |        | -0.021 |
|                         |            | H16....O10'    |        | -0.031 |
|                         |            | H17''....O8'   |        | 0.008  |
|                         |            | H16'....O10''  |        | -0.014 |
|                         |            |                |        |        |
| T7                      | 1          | H15....O14     | 0.007  | 0.006  |
|                         |            | H17'....O14'   | 0.008  | 0.009  |
|                         |            | H17''....O14'' | 0.008  | 0.009  |
|                         |            | H16'....O8     | -0.019 | -0.025 |
|                         |            | H16....O12'    | -0.017 | -0.015 |

|            |   |                |        |        |
|------------|---|----------------|--------|--------|
|            |   | H16''....O10'  | -0.020 | -0.020 |
|            |   | H15'....O12''  | -0.018 | -0.015 |
|            | 2 | H15....O14     | 0.007  | 0.010  |
|            |   | H17'....O14'   | 0.008  | 0.009  |
|            |   | H15''....O14'' | 0.011  | 0.008  |
|            |   | H16'....O8     | -0.019 | -0.036 |
|            |   | H16....O12'    | -0.017 | -0.018 |
|            |   | H17''....O10'  | -0.020 | -0.051 |
|            |   | H15'....O10''  | -0.015 | -0.018 |
|            | 3 | H15....O14     | 0.008  | 0.008  |
|            |   | H15'....O14'   | 0.008  | 0.008  |
|            |   | H15''....O14'' | 0.011  | 0.011  |
|            |   | H17'....O8     | -0.017 | -0.016 |
|            |   | H16....O10'    | -0.019 | -0.019 |
|            |   | H17''....O8'   | -0.016 | -0.016 |
|            |   | H16'....O10''  | -0.016 | -0.019 |
|            | 4 | H15....O14     | 0.009  | 0.008  |
|            |   | H17'....O14'   | 0.008  | 0.009  |
|            |   | H17''....O14'' | 0.009  | 0.010  |
|            |   | H10'....O8     | -0.019 | -0.024 |
|            |   | H16....O12'    | -0.016 | -0.014 |
|            |   | H16''....O10'  | -0.021 | -0.020 |
|            |   | H15'....O12''  | -0.019 | -0.015 |
|            | 5 | H15....O14     | 0.009  | 0.015  |
|            |   | H17'....O14'   | 0.009  | 0.062  |
|            |   | H15''....O14'' | 0.012  | 0.087  |
|            |   | H16'....O8     | -0.017 | 0.405  |
|            |   | H16....O12'    | -0.016 | -0.317 |
|            |   | H16''....O10'  | -0.020 | 0.015  |
|            |   | H15'....O10''  | -0.014 | -0.004 |
|            | 6 | H17....O14     | 0.011  | 0.020  |
|            |   | H15'....O14'   | 0.009  | 0.019  |
|            |   | H15''....O14'' | 0.011  | 0.010  |
|            |   | H15....O10'    | -0.020 | -0.020 |
|            |   | H16'....O10    | -0.012 | 0.032  |
|            |   | H16'....O10''  | -0.015 | -0.006 |
|            |   | H17''....O10'  | -0.015 | 0.020  |
|            |   |                |        |        |
| T7-ET6,2'' | 1 | H15....O14     | 0.009  | 0.009  |
|            |   | H15'....O14'   | 0.008  | 0.009  |
|            |   | H17''....O14'' | 0.010  | 0.008  |
|            |   | H16'....O8     | -0.017 | -0.014 |

|                     |   |                |        |        |
|---------------------|---|----------------|--------|--------|
|                     |   | H16....O12'    | -0.020 | -0.020 |
|                     |   | H16''....O10'  | -0.017 | -0.015 |
|                     |   | H15'....O12''  | -0.019 | -0.026 |
| T7-M5,3''-ET6,2''   | 1 | H15....O14     | 0.011  | 0.012  |
|                     |   | H15'....O14'   | 0.008  | 0.009  |
|                     |   | H17''....O14'' | 0.012  | 0.010  |
|                     |   | H16'....O8     | -0.016 | -0.011 |
|                     |   | H16....O12'    | -0.021 | -0.021 |
|                     |   | H16''....O10'  | -0.016 | -0.013 |
|                     |   | H15'....O12''  | -0.017 | -0.024 |
| T7-KT6''-M5,3'',3'' | 1 | H15....O14     | 0.008  | 0.007  |
|                     |   | H15'....O14'   | 0.008  | 0.008  |
|                     |   | H15''....O14'' | 0.018  | 0.019  |
|                     |   | H17'....O8     | -0.019 | -0.015 |
|                     |   | H16....O10'    | -0.022 | -0.025 |
|                     |   | H16''....O8'   | -0.021 | -0.017 |
|                     |   | H16'....O12''  | -0.016 | -0.026 |
|                     | 2 | H15....O14     | 0.006  | 0.004  |
|                     |   | H17'....O14'   | 0.008  | 0.009  |
|                     |   | H15''....O14'' | 0.017  | 0.016  |
|                     |   | H16'....O8     | -0.021 | -0.030 |
|                     |   | H16....O12'    | -0.017 | -0.016 |
|                     |   | H16''....O10'  | -0.024 | -0.029 |
|                     |   | H16'....O12''  | -0.015 | -0.014 |
|                     | 3 | H17....O14     | 0.009  | 0.033  |
|                     |   | H15'....O14'   | 0.007  | 0.012  |
|                     |   | H15''....O14'' | 0.019  | 0.019  |
|                     |   | H15....O10'    | -0.024 | 0.012  |
|                     |   | H17'....O10    | -0.017 | 0.051  |
|                     |   | H16'....O12''  | -0.016 | -0.011 |
|                     |   | H16''....O8'   | -0.021 | -0.005 |
|                     | 4 | H17....O14     | 0.009  | 0.009  |
|                     |   | H17'....O14'   | 0.009  | 0.010  |
|                     |   | H15''....O14'' | 0.019  | 0.018  |
|                     |   | H15....O12'    | -0.017 | -0.012 |
|                     |   | H17'....O10    | -0.018 | -0.021 |
|                     |   | H15'....O12''  | -0.014 | -0.013 |
|                     |   | H16''....O10'  | -0.023 | -0.029 |
|                     | 5 | H17....O14     | 0.011  | 0.017  |
|                     |   | H15'....O14'   | 0.010  | 0.010  |

|                         |    |                |        |        |
|-------------------------|----|----------------|--------|--------|
|                         |    | H15''....O14'' | 0.018  | 0.017  |
|                         |    | H15....O10'    | -0.018 | -0.019 |
|                         |    | H16....O12'    | -0.005 | 0.026  |
|                         |    | H16'....O12''  | -0.015 | -0.029 |
|                         |    | H16''....O8'   | -0.021 | -0.017 |
|                         | 6  | H17....O14     | 0.012  | 0.011  |
|                         |    | H15'....O14'   | 0.010  | 0.012  |
|                         |    | H15''....O14'' | 0.018  | 0.019  |
|                         |    | H15....O12'    | -0.012 | 0.001  |
|                         |    | H16....O10'    | -0.015 | -0.018 |
|                         |    | H16''....O8'   | -0.022 | -0.014 |
|                         |    | H16'....O12''  | -0.014 | -0.030 |
|                         | 7  | H17....O14     | 0.011  | 0.017  |
|                         |    | H17'....O14'   | 0.009  | 0.013  |
|                         |    | H15''....O14'' | 0.020  | 0.022  |
|                         |    | H15....O12'    | -0.019 | -0.012 |
|                         |    | H16....O10'    | -0.019 | -0.046 |
|                         |    | H15'....O12''  | -0.006 | -0.001 |
|                         |    | H16''....O10'  | -0.015 | -0.037 |
|                         | 8  | H17....O14     | 0.010  | 0.041  |
|                         |    | H17'....O14'   | 0.010  | 0.017  |
|                         |    | H15''....O14'' | 0.020  | 0.022  |
|                         |    | H15....O10'    | -0.025 | -0.031 |
|                         |    | H16....O12'    | -0.012 | 0.028  |
|                         |    | H16'....O10''  | -0.017 | -0.046 |
|                         |    | H15'....O12''  | -0.006 | -0.012 |
|                         | 9  | H17....O14     | 0.010  | 0.002  |
|                         |    | H17'....O14'   | 0.009  | 0.010  |
|                         |    | H15''....O14'' | 0.021  | 0.024  |
|                         |    | H15....O12'    | -0.017 | -0.001 |
|                         |    | H16....O10'    | -0.021 | -0.002 |
|                         |    | H15'....O10''  | -0.020 | 0.008  |
|                         |    | H16'....O12''  | -0.007 | -0.022 |
|                         | 10 | H17....O14     | 0.010  | 0.013  |
|                         |    | H17'....O14'   | 0.011  | 0.022  |
|                         |    | H15''....O14'' | 0.021  | 0.018  |
|                         |    | H15....O10'    | -0.024 | -0.008 |
|                         |    | H16....O12'    | -0.009 | 0.050  |
|                         |    | H16'....O12''  | -0.010 | -0.026 |
|                         |    | H15'....O10''  | -0.021 | 0.036  |
|                         |    |                |        |        |
| T7-KT2,6''-M5,5,3'',3'' | 1  | H17....O14     | 0.016  | 0.016  |

|                     |   |                |        |        |
|---------------------|---|----------------|--------|--------|
|                     |   | H15'....O14'   | 0.008  | 0.009  |
|                     |   | H15''....O14'' | 0.018  | 0.018  |
|                     |   | H17'....O8     | -0.016 | -0.013 |
|                     |   | H16....O10'    | -0.024 | -0.032 |
|                     |   | H16''....O8'   | -0.021 | -0.018 |
|                     |   | H16'....O12''  | -0.018 | -0.030 |
|                     |   |                |        |        |
| T8-KT6''-M5,3'',3'' | 1 | H15....O14     | 0.007  | 0.008  |
|                     |   | H15'....O14'   | 0.007  | 0.009  |
|                     |   | H15''....O14'' | 0.016  | 0.018  |
|                     |   | H17'....O8     | -0.020 | -0.013 |
|                     |   | H16....O10'    | -0.022 | -0.028 |
|                     |   | H16''....O8'   | -0.021 | -0.015 |
|                     |   | H16'....O12''  | -0.017 | -0.030 |
|                     | 2 | H15....O14     | 0.006  | 0.004  |
|                     |   | H17'....O14'   | 0.008  | 0.009  |
|                     |   | H15''....O14'' | 0.017  | 0.016  |
|                     |   | H16'....O8     | -0.021 | -0.031 |
|                     |   | H16....O12'    | -0.017 | -0.016 |
|                     |   | H16''....O10'  | -0.024 | -0.030 |
|                     |   | H16'....O12''  | -0.015 | -0.014 |
|                     | 3 | H17....O14     | 0.009  | 0.018  |
|                     |   | H15'....O14'   | 0.007  | 0.010  |
|                     |   | H15''....O14'' | 0.016  | 0.014  |
|                     |   | H15....O10'    | -0.023 | -0.029 |
|                     |   | H17'....O10    | -0.017 | 0.017  |
|                     |   | H16'....O12''  | -0.017 | -0.027 |
|                     |   | H16''....O8'   | -0.025 | -0.014 |
|                     | 4 | H17....O14     | 0.009  | 0.009  |
|                     |   | H17'....O14'   | 0.009  | 0.010  |
|                     |   | H15''....O14'' | 0.016  | 0.017  |
|                     |   | H15....O12'    | -0.016 | -0.011 |
|                     |   | H17'....O10    | -0.018 | -0.022 |
|                     |   | H15'....O12''  | -0.014 | -0.013 |
|                     |   | H16''....O10'  | -0.023 | -0.029 |
|                     | 5 | H17....O14     | 0.011  | 0.013  |
|                     |   | H15'....O14'   | 0.010  | 0.011  |
|                     |   | H15''....O14'' | 0.017  | 0.016  |
|                     |   | H15....O10'    | -0.020 | -0.023 |
|                     |   | H16....O12'    | -0.004 | 0.025  |
|                     |   | H16'....O12''  | -0.016 | -0.036 |
|                     |   | H16''....O8'   | -0.021 | -0.010 |



|                |    |                |        |        |
|----------------|----|----------------|--------|--------|
|                | 6  | H17....O14     | 0.012  | 0.012  |
|                |    | H15'....O14'   | 0.010  | 0.014  |
|                |    | H15''....O14'' | 0.016  | 0.023  |
|                |    | H15....O12'    | -0.012 | 0.033  |
|                |    | H16....O10'    | -0.015 | -0.005 |
|                |    | H16''....O8'   | -0.022 | 0.001  |
|                |    | H16'....O12''  | -0.014 | -0.038 |
|                | 7  | H17....O14     | 0.011  | 0.017  |
|                |    | H17'....O14'   | 0.009  | 0.013  |
|                |    | H15''....O14'' | 0.018  | 0.020  |
|                |    | H15....O12'    | -0.018 | -0.012 |
|                |    | H16....O10'    | -0.018 | -0.046 |
|                |    | H15'....O12''  | -0.007 | -0.001 |
|                |    | H16''....O10'  | -0.015 | -0.035 |
|                | 8  | H17....O14     | 0.011  | 0.042  |
|                |    | H17'....O14'   | 0.011  | 0.017  |
|                |    | H15''....O14'' | 0.018  | 0.021  |
|                |    | H15....O10'    | -0.026 | -0.031 |
|                |    | H16....O12'    | -0.012 | 0.029  |
|                |    | H16'....O10''  | -0.017 | -0.047 |
|                |    | H15'....O12''  | -0.007 | -0.012 |
|                | 9  | H17....O14     | 0.010  | 0.001  |
|                |    | H17'....O14'   | 0.008  | 0.010  |
|                |    | H15''....O14'' | 0.019  | 0.022  |
|                |    | H15....O12'    | -0.018 | -0.002 |
|                |    | H16....O10'    | -0.021 | -0.004 |
|                |    | H15'....O10''  | -0.019 | 0.007  |
|                |    | H16'....O12''  | -0.007 | -0.025 |
|                | 10 | H17....O14     | 0.010  | 0.016  |
|                |    | H17'....O14'   | 0.011  | 0.021  |
|                |    | H15''....O14'' | 0.018  | 0.015  |
|                |    | H15....O10'    | -0.024 | -0.023 |
|                |    | H16....O12'    | -0.009 | 0.047  |
|                |    | H16'....O12''  | -0.011 | -0.018 |
|                |    | H15'....O10''  | -0.020 | 0.053  |
|                |    |                |        |        |
| T8-KT2-M5,5,3" | 1  | H17....O14     | 0.017  | 0.030  |
|                |    | H17'....O14'   | 0.008  | 0.013  |
|                |    | H17''....O14'' | 0.006  | 0.009  |
|                |    | H16'....O8     | -0.017 | -0.033 |
|                |    | H16....O12'    | -0.020 | 0.005  |
|                |    | H16''....O10'  | -0.023 | -0.030 |

|  |   |              |        |        |
|--|---|--------------|--------|--------|
|  |   | H16'....O12" | -0.020 | -0.001 |
|  | 2 | H17....O14   | 0.017  | 0.016  |
|  |   | H15'....O14' | 0.009  | 0.010  |
|  |   | H17"....O14" | 0.006  | 0.005  |
|  |   | H17'....O8   | -0.016 | -0.014 |
|  |   | H16....O10'  | -0.023 | -0.030 |
|  |   | H16"....O8'  | -0.017 | -0.016 |
|  |   | H16'....O12" | -0.020 | -0.030 |
|  | 3 | H17....O14   | 0.021  | 0.021  |
|  |   | H17'....O14' | 0.007  | 0.015  |
|  |   | H15"....O14" | 0.009  | 0.024  |
|  |   | H16'....O8   | -0.019 | -0.026 |
|  |   | H15....O12'  | -0.019 | 0.004  |
|  |   | H17"....O10' | -0.024 | -0.012 |
|  |   | H15'....O10" | -0.018 | 0.047  |
|  | 4 | H17....O14   | 0.017  | 0.017  |
|  |   | H15'....O14' | 0.010  | 0.010  |
|  |   | H15"....O14" | 0.008  | 0.009  |
|  |   | H17'....O8   | -0.015 | -0.014 |
|  |   | H16....O10'  | -0.023 | -0.028 |
|  |   | H17"....O8'  | -0.016 | -0.011 |
|  |   | H16'....O10" | -0.018 | -0.022 |
|  | 5 | H17....O14   | 0.017  | 0.014  |
|  |   | H17'....O14' | 0.010  | 0.011  |
|  |   | H15"....O14" | 0.011  | 0.015  |
|  |   | H16'....O8   | -0.016 | -0.031 |
|  |   | H16....O12'  | -0.020 | -0.016 |
|  |   | H17"....O10' | -0.019 | -0.015 |
|  |   | H16"....O8'  | -0.004 | 0.014  |
|  | 6 | H17....O14   | 0.017  | 0.026  |
|  |   | H17'....O14' | 0.010  | 0.017  |
|  |   | H15"....O14" | 0.011  | 0.002  |
|  |   | H15....O12'  | -0.015 | -0.029 |
|  |   | H16....O10'  | -0.022 | 0.011  |
|  |   | H16"....O8'  | -0.015 | 0.012  |
|  |   | H16'....O12" | -0.010 | -0.004 |
|  | 7 | H17....O14   | 0.019  | 0.021  |
|  |   | H15'....O14' | 0.009  | 0.013  |
|  |   | H15"....O14" | 0.009  | 0.008  |
|  |   | H17'....O8   | -0.009 | -0.001 |
|  |   | H16'....O10  | -0.012 | -0.033 |
|  |   | H17"....O8'  | -0.018 | -0.007 |

|                         |    |                |        |        |
|-------------------------|----|----------------|--------|--------|
|                         | 8  | H16''....O10'  | -0.019 | -0.042 |
|                         |    | H17....O14     | 0.019  | 0.020  |
|                         |    | H15'....O14'   | 0.010  | 0.010  |
|                         |    | H15''....O14'' | 0.011  | 0.015  |
|                         |    | H17'....O8     | -0.007 | -0.002 |
|                         |    | H16'....O10    | -0.014 | -0.019 |
|                         |    | H17''....O8'   | -0.011 | -0.012 |
|                         |    | H16''....O10'  | -0.024 | -0.035 |
|                         | 9  | H17....O14     | 0.019  | 0.026  |
|                         |    | H17'....O14'   | 0.002  | 0.009  |
|                         |    | H15''....O14'' | 0.010  | 0.000  |
|                         |    | H16'....O8     | -0.009 | -0.020 |
|                         |    | H17'....O10    | -0.019 | 0.004  |
|                         |    | H16''....O10'  | -0.022 | 0.004  |
|                         |    | H17''....O8'   | -0.017 | -0.004 |
|                         | 10 | H17....O14     | 0.031  | 0.012  |
|                         |    | H15'....O14'   | 0.011  | 0.028  |
|                         |    | H15''....O14'' | 0.010  | 0.018  |
|                         |    | H16'....O8     | -0.010 | -0.015 |
|                         |    | H17'....O10    | -0.007 | 0.057  |
|                         |    | H17''....O10'  | -0.023 | 0.019  |
|                         |    | H16''....O8'   | -0.009 | 0.093  |
|                         |    |                |        |        |
| T8-KT2,6''-M5,5,3'',3'' | 1  | H17....O14     | 0.017  | 0.016  |
|                         |    | H15'....O14'   | 0.007  | 0.010  |
|                         |    | H15''....O14'' | 0.016  | 0.023  |
|                         |    | H17'....O8     | -0.016 | -0.011 |
|                         |    | H16....O10'    | -0.024 | -0.039 |
|                         |    | H16''....O8'   | -0.020 | -0.009 |
|                         |    | H16'....O12''  | -0.018 | -0.037 |
|                         |    |                |        |        |
| T9                      | 1  | H15....O14     | 0.007  | 0.006  |
|                         |    | H17'....O14'   | 0.009  | 0.009  |
|                         |    | H17''....O14'' | 0.008  | 0.008  |
|                         |    | H16'....O8     | -0.020 | -0.026 |
|                         |    | H16....O12'    | -0.016 | -0.015 |
|                         |    | H16''....O10'  | -0.020 | -0.019 |
|                         |    | H15'....O12''  | -0.018 | -0.015 |
|                         | 2  | H15....O14     | 0.007  | 0.003  |
|                         |    | H17'....O14'   | 0.009  | 0.010  |
|                         |    | H15''....O14'' | 0.009  | 0.015  |
|                         |    | H16'....O8     | -0.019 | -0.057 |

|          |   |                |        |        |
|----------|---|----------------|--------|--------|
|          |   | H16....O12'    | -0.016 | -0.016 |
|          |   | H17''....O10'  | -0.022 | -0.071 |
|          |   | H15'....O10''  | -0.014 | -0.017 |
|          | 3 | H15....O14     | 0.008  | 0.009  |
|          |   | H15'....O14'   | 0.009  | 0.009  |
|          |   | H15''....O14'' | 0.010  | 0.011  |
|          |   | H17'....O8     | -0.017 | -0.016 |
|          |   | H16....O10'    | -0.019 | -0.018 |
|          |   | H17''....O8'   | -0.016 | -0.015 |
|          |   | H16'....O10''  | -0.014 | -0.019 |
|          | 4 | H15....O14     | 0.009  | 0.009  |
|          |   | H17'....O14'   | 0.008  | 0.009  |
|          |   | H17''....O14'' | 0.007  | 0.008  |
|          |   | H10'....O8     | -0.018 | -0.024 |
|          |   | H16....O12'    | -0.016 | -0.014 |
|          |   | H16''....O10'  | -0.020 | -0.019 |
|          |   | H15'....O12''  | -0.018 | -0.015 |
|          | 5 | H15....O14     | 0.009  | 0.011  |
|          |   | H17'....O14'   | 0.009  | 0.013  |
|          |   | H15''....O14'' | 0.011  | 0.039  |
|          |   | H16'....O8     | -0.018 | -0.026 |
|          |   | H16....O12'    | -0.016 | 0.000  |
|          |   | H16''....O10'  | -0.021 | -0.020 |
|          |   | H15'....O10''  | -0.013 | 0.049  |
|          | 6 | H17....O14     | 0.011  | 0.020  |
|          |   | H15'....O14'   | 0.009  | 0.019  |
|          |   | H15''....O14'' | 0.011  | 0.009  |
|          |   | H15....O10'    | -0.020 | -0.019 |
|          |   | H16'....O10    | -0.012 | -0.066 |
|          |   | H16'....O10''  | -0.014 | -0.003 |
|          |   | H17''....O10'  | -0.016 | 0.019  |
|          |   |                |        |        |
| T9-M5,3" | 1 | H15....O14     | 0.006  | 0.005  |
|          |   | H17'....O14'   | 0.008  | 0.009  |
|          |   | H17''....O14'' | 0.007  | 0.007  |
|          |   | H16'....O8     | -0.019 | -0.027 |
|          |   | H16....O12'    | -0.017 | -0.015 |
|          |   | H16''....O10'  | -0.020 | -0.022 |
|          |   | H15'....O12''  | -0.018 | -0.014 |
|          | 2 | H15....O14     | 0.006  | -0.025 |
|          |   | H17'....O14'   | 0.009  | -0.018 |
|          |   | H15''....O14'' | 0.010  | 0.013  |

|                   |   |                |        |        |
|-------------------|---|----------------|--------|--------|
|                   |   | H16'....O8     | -0.018 | -0.015 |
|                   |   | H16....O12'    | -0.017 | 0.008  |
|                   |   | H17''....O10'  | -0.021 | -0.031 |
|                   |   | H15'....O10''  | -0.014 | 0.017  |
|                   | 3 | H15....O14     | 0.006  | 0.008  |
|                   |   | H15'....O14'   | 0.009  | 0.013  |
|                   |   | H15''....O14'' | 0.010  | 0.018  |
|                   |   | H17'....O8     | -0.018 | -0.022 |
|                   |   | H16....O10'    | -0.017 | -0.004 |
|                   |   | H17''....O8'   | -0.021 | -0.016 |
|                   |   | H16'....O10''  | -0.014 | 0.025  |
|                   |   |                |        |        |
|                   | 4 | H15....O14     | 0.009  | 0.009  |
|                   |   | H17'....O14'   | 0.008  | 0.009  |
|                   |   | H17''....O14'' | 0.007  | 0.008  |
|                   |   | H10'....O8     | -0.018 | -0.026 |
|                   |   | H16....O12'    | -0.016 | -0.014 |
|                   |   | H16''....O10'  | -0.020 | -0.023 |
|                   |   | H15'....O12''  | -0.017 | -0.014 |
|                   |   |                |        |        |
|                   | 5 | H15....O14     | 0.010  | 0.011  |
|                   |   | H17'....O14'   | 0.009  | 0.013  |
|                   |   | H15''....O14'' | 0.009  | 0.037  |
|                   |   | H16'....O8     | -0.017 | -0.026 |
|                   |   | H16....O12'    | -0.016 | -0.001 |
|                   |   | H17''....O10'  | -0.021 | -0.021 |
|                   |   | H15'....O10''  | -0.014 | -0.055 |
|                   |   |                |        |        |
|                   | 6 | H17....O14     | 0.010  | 0.018  |
|                   |   | H15'....O14'   | 0.010  | 0.020  |
|                   |   | H15''....O14'' | 0.009  | 0.009  |
|                   |   | H15....O10'    | -0.020 | 0.002  |
|                   |   | H17'....O10    | -0.013 | 0.039  |
|                   |   | H16'....O10''  | -0.015 | 0.001  |
|                   |   | H17''....O10'  | -0.015 | 0.028  |
|                   |   |                |        |        |
|                   |   |                |        |        |
| T9-ET6,2''        | 1 | H15....O14     | 0.009  | 0.010  |
|                   |   | H15'....O14'   | 0.009  | 0.008  |
|                   |   | H17''....O14'' | 0.008  | 0.007  |
|                   |   | H17'....O8     | -0.017 | -0.014 |
|                   |   | H16....O10'    | -0.021 | -0.021 |
|                   |   | H16''....O8'   | -0.017 | -0.015 |
|                   |   | H16'....O12''  | -0.019 | -0.025 |
|                   |   |                |        |        |
| T9-M5,3''-ET6,2'' | 1 | H15....O14     | 0.010  | 0.012  |

|                     |            |                |        |        |
|---------------------|------------|----------------|--------|--------|
|                     |            | H15'....O14'   | 0.009  | 0.009  |
|                     |            | H17''....O14'' | 0.010  | 0.010  |
|                     |            | H17'....O8     | -0.015 | -0.010 |
|                     |            | H16....O10'    | -0.018 | -0.021 |
|                     |            | H16''....O8'   | -0.015 | -0.012 |
|                     |            | H16'....O12''  | -0.016 | -0.025 |
|                     |            |                |        |        |
| T9-M5,3''-ET6,4''   | 1          | H15....O14     | 0.011  | 0.011  |
|                     |            | H15'....O14'   | 0.008  | 0.008  |
|                     |            | H15''....O14'' | 0.011  | 0.011  |
|                     |            | H17'....O8     | -0.015 | -0.013 |
|                     |            | H16....O10'    | -0.022 | -0.021 |
|                     |            | H17''....O8'   | -0.020 | -0.018 |
|                     |            | H16'....O10''  | -0.028 | -0.031 |
|                     | 1-y-out-in | H15....O14     |        | 0.009  |
|                     |            | H15'....O14'   |        | 0.013  |
|                     |            | H15''....O14'' |        | 0.014  |
|                     |            | H17'....O8     |        | -0.020 |
|                     |            | H16....O10'    |        | -0.029 |
|                     |            | H17''....O8'   |        | 0.007  |
|                     |            | H16'....O10''  |        | -0.016 |
|                     | 1-y-in-in  | H15....O14     |        | 0.008  |
|                     |            | H15'....O14'   |        | 0.014  |
|                     |            | H15''....O14'' |        | 0.014  |
|                     |            | H17'....O8     |        | -0.023 |
|                     |            | H16....O10'    |        | -0.030 |
|                     |            | H17''....O8'   |        | 0.007  |
|                     |            | H16'....O10''  |        | -0.013 |
|                     |            |                |        |        |
| T9-KT6''-M5,3'',3'' | 1          | H15....O14     | 0.006  | 0.010  |
|                     |            | H15'....O14'   | 0.007  | 0.012  |
|                     |            | H15''....O14'' | 0.017  | 0.030  |
|                     |            | H17'....O8     | -0.019 | 0.000  |
|                     |            | H16....O10'    | -0.022 | -0.030 |
|                     |            | H16''....O8'   | -0.021 | 0.004  |
|                     |            | H16'....O12''  | -0.017 | -0.033 |
|                     | 2          | H15....O14     | 0.006  | 0.004  |
|                     |            | H17'....O14'   | 0.008  | 0.009  |
|                     |            | H15''....O14'' | 0.017  | 0.016  |
|                     |            | H16'....O8     | -0.021 | -0.030 |
|                     |            | H16....O12'    | -0.017 | -0.016 |
|                     |            | H16''....O10'  | -0.024 | -0.029 |

|  |   |              |        |        |
|--|---|--------------|--------|--------|
|  |   | H16'....O12" | -0.015 | -0.014 |
|  | 3 | H17....O14   | 0.009  | 0.016  |
|  |   | H15'....O14' | 0.007  | 0.009  |
|  |   | H15"....O14" | 0.017  | 0.018  |
|  |   | H15....O10'  | -0.026 | -0.034 |
|  |   | H17'....O10  | -0.018 | -0.013 |
|  |   | H16'....O12" | -0.018 | -0.032 |
|  |   | H16"....O8'  | -0.021 | -0.013 |
|  | 4 | H17....O14   | 0.009  | 0.008  |
|  |   | H17'....O14' | 0.009  | 0.010  |
|  |   | H15"....O14" | 0.017  | 0.017  |
|  |   | H15....O12'  | -0.017 | -0.012 |
|  |   | H17'....O10  | -0.018 | -0.022 |
|  |   | H15'....O12" | -0.014 | -0.013 |
|  |   | H16"....O10' | -0.023 | -0.030 |
|  | 5 | H17....O14   | 0.011  | 0.027  |
|  |   | H15'....O14' | 0.014  | 0.010  |
|  |   | H15"....O14" | 0.019  | 0.011  |
|  |   | H15....O10'  | -0.026 | -0.032 |
|  |   | H16....O12'  | -0.004 | 0.001  |
|  |   | H16'....O12" | -0.015 | -0.028 |
|  |   | H16"....O8'  | -0.022 | -0.014 |
|  | 6 | H17....O14   | 0.010  | 0.009  |
|  |   | H15'....O14' | 0.012  | 0.011  |
|  |   | H15"....O14" | 0.018  | 0.027  |
|  |   | H15....O12'  | -0.018 | -0.008 |
|  |   | H16....O10'  | -0.022 | -0.024 |
|  |   | H16"....O8'  | -0.024 | 0.014  |
|  |   | H16'....O12" | -0.013 | -0.026 |
|  | 7 | H17....O14   | 0.011  | 0.017  |
|  |   | H17'....O14' | 0.009  | 0.012  |
|  |   | H15"....O14" | 0.019  | 0.021  |
|  |   | H15....O12'  | -0.018 | -0.011 |
|  |   | H16....O10'  | -0.018 | -0.047 |
|  |   | H15'....O12" | -0.008 | -0.002 |
|  |   | H16"....O10' | -0.013 | -0.035 |
|  | 8 | H17....O14   | 0.011  | 0.042  |
|  |   | H17'....O14' | 0.011  | 0.017  |
|  |   | H15"....O14" | 0.019  | 0.021  |
|  |   | H15....O10'  | -0.025 | -0.030 |
|  |   | H16....O12'  | -0.012 | 0.028  |
|  |   | H16'....O10" | -0.015 | -0.046 |

|                      |    |              |        |        |
|----------------------|----|--------------|--------|--------|
|                      | 9  | H15'....O12" | -0.007 | -0.013 |
|                      |    | H17....O14   | 0.010  | 0.009  |
|                      |    | H17'....O14' | 0.008  | 0.009  |
|                      |    | H15"....O14" | 0.019  | 0.025  |
|                      |    | H15....O12'  | -0.017 | -0.008 |
|                      |    | H16....O10'  | -0.022 | -0.004 |
|                      |    | H15'....O10" | -0.018 | 0.004  |
|                      |    | H16'....O12" | -0.009 | -0.019 |
|                      | 10 | H17....O14   | 0.010  | 0.029  |
|                      |    | H17'....O14' | 0.011  | 0.010  |
|                      |    | H15"....O14" | 0.019  | 0.013  |
|                      |    | H15....O10'  | -0.024 | -0.023 |
|                      |    | H16....O12'  | -0.008 | 0.007  |
|                      |    | H16'....O12" | -0.011 | -0.029 |
|                      |    | H15'....O10" | -0.019 | 0.084  |
|                      |    |              |        |        |
| T9-KT6"-M3",3"-ET4   | 1  | H17....O14   | 0.010  | 0.010  |
|                      |    | H17'....O14' | 0.009  | 0.009  |
|                      |    | H15"....O14" | 0.017  | 0.017  |
|                      |    | H15....O12'  | -0.015 | -0.016 |
|                      |    | H16'....O10  | -0.031 | -0.045 |
|                      |    | H15'....O12" | -0.014 | -0.012 |
|                      |    | H16"....O10' | -0.027 | -0.036 |
|                      |    |              |        |        |
| T9-KT6"-M5,3",3"-ET6 | 1  | H15....O14   | 0.010  | 0.008  |
|                      |    | H17'....O14' | 0.009  | 0.010  |
|                      |    | H15"....O14" | 0.017  | 0.017  |
|                      |    | H16'....O8   | -0.018 | -0.028 |
|                      |    | H16....O12'  | -0.016 | -0.006 |
|                      |    | H16"....O10' | -0.024 | -0.029 |
|                      |    | H15'....O12" | -0.016 | -0.014 |
|                      |    |              |        |        |
| T9-KT2,6"-M5,5,3",3" | 1  | H17....O14   | 0.017  | 0.015  |
|                      |    | H15'....O14' | 0.007  | 0.012  |
|                      |    | H15"....O14" | 0.017  | 0.032  |
|                      |    | H17'....O8   | -0.016 | -0.009 |
|                      |    | H16....O10'  | -0.024 | -0.037 |
|                      |    | H16"....O8'  | -0.021 | 0.002  |
|                      |    | H16'....O12" | -0.018 | -0.036 |
|                      |    |              |        |        |
| T10                  | 1  | H15....O14   | 0.009  | 0.007  |
|                      |    | H17'....O14' | 0.010  | 0.009  |



|            |   |              |        |        |
|------------|---|--------------|--------|--------|
|            |   | H17"....O14" | 0.008  | 0.009  |
|            |   | H16'....O8   | -0.019 | -0.025 |
|            |   | H16....O12'  | -0.016 | -0.015 |
|            |   | H16"....O10' | -0.021 | -0.020 |
|            |   | H15'....O12" | -0.019 | -0.017 |
|            | 2 | H15....O14   | 0.008  | 0.001  |
|            |   | H17'....O14' | 0.010  | 0.008  |
|            |   | H15"....O14" | 0.014  | 0.016  |
|            |   | H16'....O8   | -0.019 | -0.054 |
|            |   | H16....O12'  | -0.015 | -0.018 |
|            |   | H17"....O10' | -0.021 | -0.056 |
|            |   | H15'....O10" | -0.011 | -0.008 |
|            | 3 | H15....O14   | 0.008  | 0.009  |
|            |   | H15'....O14' | 0.010  | 0.009  |
|            |   | H15"....O14" | 0.013  | 0.010  |
|            |   | H17'....O8   | -0.019 | -0.018 |
|            |   | H16....O10'  | -0.019 | -0.020 |
|            |   | H17"....O8'  | -0.018 | -0.017 |
|            |   | H16'....O10" | -0.012 | -0.019 |
|            | 4 | H15....O14   | 0.008  | 0.007  |
|            |   | H17'....O14' | 0.010  | 0.013  |
|            |   | H17"....O14" | 0.008  | 0.009  |
|            |   | H10'....O8   | -0.019 | -0.025 |
|            |   | H16....O12'  | -0.016 | -0.016 |
|            |   | H16"....O10' | -0.021 | -0.017 |
|            |   | H15'....O12" | -0.019 | -0.017 |
|            | 5 | H15....O14   | 0.008  | -0.006 |
|            |   | H17'....O14' | 0.009  | 0.008  |
|            |   | H15"....O14" | 0.013  | 0.019  |
|            |   | H16'....O8   | -0.018 | -0.057 |
|            |   | H16....O12'  | -0.016 | -0.019 |
|            |   | H17"....O10' | -0.020 | -0.068 |
|            |   | H15'....O10" | -0.011 | -0.013 |
|            | 6 | H17....O14   | 0.009  | 0.067  |
|            |   | H15'....O14' | 0.009  | 0.032  |
|            |   | H15"....O14" | 0.013  | 0.023  |
|            |   | H15....O10'  | -0.023 | 0.025  |
|            |   | H16'....O10  | -0.015 | 0.089  |
|            |   | H16'....O10" | -0.012 | 0.041  |
|            |   | H17"....O10' | -0.018 | 0.065  |
|            |   |              |        |        |
| T10-ET6,2" | 1 | H15....O14   | 0.010  | 0.010  |

|                          |   |                |        |        |
|--------------------------|---|----------------|--------|--------|
|                          |   | H15'....O14'   | 0.010  | 0.009  |
|                          |   | H17''....O14'' | 0.010  | 0.009  |
|                          |   | H17'....O8     | -0.019 | -0.016 |
|                          |   | H16....O10'    | -0.019 | -0.021 |
|                          |   | H16''....O8'   | -0.017 | -0.015 |
|                          |   | H16'....O12''  | -0.018 | -0.025 |
|                          |   |                |        |        |
| T10-M5,3''-ET6,2''       | 1 | H15....O14     | 0.014  | 0.015  |
|                          |   | H15'....O14'   | 0.009  | 0.013  |
|                          |   | H17''....O14'' | 0.017  | 0.010  |
|                          |   | H17'....O8     | -0.016 | -0.012 |
|                          |   | H16....O10'    | -0.019 | -0.020 |
|                          |   | H16''....O8'   | -0.015 | -0.015 |
|                          |   | H16'....O12''  | -0.016 | -0.025 |
|                          |   |                |        |        |
| T10-M5,3''-ET6,2'',6''   | 1 | H15....O14     | -0.081 | -0.071 |
|                          |   | H17'....O14'   | 0.015  | 0.012  |
|                          |   | H16'....O8     | -0.011 | -0.026 |
|                          |   | H16....O12'    | -0.012 | 0.000  |
|                          |   | H16''....O10'  | -0.005 | -0.033 |
|                          |   | H15'....O12''  | -0.031 | -0.028 |
|                          |   |                |        |        |
| T10-KT2,6''-M5,5,3'',3'' | 1 | H17....O14     | 0.019  | 0.019  |
|                          |   | H15'....O14'   | 0.010  | 0.012  |
|                          |   | H15''....O14'' | 0.019  | 0.032  |
|                          |   | H17'....O8     | -0.020 | -0.014 |
|                          |   | H16....O10'    | -0.019 | -0.037 |
|                          |   | H16''....O8'   | -0.020 | -0.003 |
|                          |   | H16'....O12''  | -0.019 | -0.037 |
|                          |   |                |        |        |
| T11-ET6,2''              | 1 | H15....O14     | 0.010  | 0.010  |
|                          |   | H17'....O14'   | 0.009  | 0.012  |
|                          |   | H17''....O14'' | 0.009  | 0.010  |
|                          |   | H16'....O8     | -0.018 | -0.025 |
|                          |   | H16....O12'    | -0.017 | -0.015 |
|                          |   | H16''....O10'  | -0.019 | -0.018 |
|                          |   | H15'....O12''  | -0.019 | -0.016 |
|                          |   |                |        |        |
| T11-M5,3''-ET6,2''       | 1 | H15....O14     | 0.021  | 0.018  |
|                          |   | H17'....O14'   | 0.015  | 0.010  |
|                          |   | H17''....O14'' | 0.013  | 0.011  |
|                          |   | H16'....O8     | -0.025 | -0.015 |
|                          |   | H16....O12'    | 0.003  | -0.015 |

|                  |            |                |        |        |
|------------------|------------|----------------|--------|--------|
|                  | 1-y-out-in | H16''....O10'  | -0.026 | -0.017 |
|                  |            | H15'....O12''  | -0.003 | -0.017 |
|                  |            | H15....O14     |        | 0.012  |
|                  |            | H17'....O14'   |        | 0.013  |
|                  |            | H17''....O14'' |        | 0.012  |
|                  |            | H16'....O8     |        | -0.025 |
|                  |            | H16....O12'    |        | -0.014 |
|                  |            | H16''....O10'  |        | -0.020 |
|                  |            | H15'....O12''  |        | -0.013 |
|                  |            |                |        |        |
| T12-KT2-M5,5,3'' | 1          | H17....O14     | 0.017  | 0.035  |
|                  |            | H17'....O14'   | 0.007  | 0.015  |
|                  |            | H17''....O14'' | 0.006  | 0.010  |
|                  |            | H16'....O8     | -0.017 | -0.030 |
|                  |            | H16....O12'    | -0.020 | 0.011  |
|                  |            | H16''....O10'  | -0.023 | -0.025 |
|                  |            | H16'....O12''  | -0.020 | 0.005  |
|                  | 2          | H17....O14     | 0.017  | 0.016  |
|                  |            | H15'....O14'   | 0.009  | 0.009  |
|                  |            | H17''....O14'' | 0.006  | 0.004  |
|                  |            | H17'....O8     | -0.016 | -0.014 |
|                  |            | H16....O10'    | -0.024 | -0.031 |
|                  |            | H16''....O8'   | -0.017 | -0.015 |
|                  |            | H16'....O12''  | -0.021 | -0.031 |
|                  | 3          | H17....O14     | 0.018  | 0.021  |
|                  |            | H17'....O14'   | 0.007  | 0.016  |
|                  |            | H15''....O14'' | 0.009  | 0.023  |
|                  |            | H16'....O8     | -0.018 | -0.023 |
|                  |            | H15....O12'    | -0.021 | 0.002  |
|                  |            | H17''....O10'  | -0.026 | -0.023 |
|                  |            | H15'....O10''  | -0.018 | 0.033  |
|                  | 4          | H17....O14     | 0.017  | 0.017  |
|                  |            | H15'....O14'   | 0.010  | 0.010  |
|                  |            | H15''....O14'' | 0.008  | 0.009  |
|                  |            | H17'....O8     | -0.015 | -0.013 |
|                  |            | H16....O10'    | -0.023 | -0.028 |
|                  |            | H17''....O8'   | -0.016 | -0.012 |
|                  |            | H16'....O10''  | -0.018 | -0.023 |
|                  | 5          | H17....O14     | 0.019  | 0.011  |
|                  |            | H17'....O14'   | 0.015  | 0.010  |
|                  |            | H15''....O14'' | 0.012  | 0.026  |
|                  |            | H16'....O8     | -0.016 | -0.029 |

|                      |    |                |        |        |
|----------------------|----|----------------|--------|--------|
|                      |    | H16....O12'    | -0.021 | -0.013 |
|                      |    | H17''....O10'  | -0.025 | -0.032 |
|                      |    | H16''....O8'   | 0.000  | -0.003 |
|                      | 6  | H17....O14     | 0.018  | 0.031  |
|                      |    | H17'....O14'   | 0.011  | 0.010  |
|                      |    | H15''....O14'' | 0.010  | 0.009  |
|                      |    | H16'....O8     | -0.013 | -0.024 |
|                      |    | H16....O12'    | -0.024 | 0.013  |
|                      |    | H16''....O10'  | -0.022 | -0.022 |
|                      |    | H17''....O8'   | -0.018 | -0.010 |
|                      |    | H17....O14     | 0.019  | 0.020  |
|                      |    | H15'....O14'   | 0.009  | 0.012  |
|                      |    | H15''....O14'' | 0.010  | 0.017  |
|                      | 7  | H17'....O8     | -0.008 | -0.001 |
|                      |    | H16'....O10    | -0.012 | -0.033 |
|                      |    | H17''....O8'   | -0.018 | -0.013 |
|                      |    | H16''....O10'  | -0.019 | -0.045 |
|                      |    | H17....O14     | 0.019  | 0.021  |
|                      |    | H15'....O14'   | 0.011  | 0.017  |
|                      |    | H15''....O14'' | 0.011  | 0.041  |
|                      | 8  | H17'....O8     | -0.007 | -0.014 |
|                      |    | H16'....O10    | -0.014 | -0.045 |
|                      |    | H17''....O8'   | -0.011 | 0.026  |
|                      |    | H16''....O10'  | -0.025 | -0.033 |
|                      |    | H17....O14     | 0.019  | -0.012 |
|                      |    | H17'....O14'   | 0.008  | 0.008  |
|                      |    | H15''....O14'' | 0.010  | -0.040 |
|                      | 9  | H16'....O8     | -0.009 | -0.019 |
|                      |    | H16....O12'    | -0.019 | 0.007  |
|                      |    | H17''....O10'  | -0.022 | 0.001  |
|                      |    | H15'....O10''  | -0.018 | -0.010 |
|                      | 10 | H17....O14     | 0.021  | 0.037  |
|                      |    | H15'....O14'   | 0.011  | 0.015  |
|                      |    | H15''....O14'' | 0.010  | 0.003  |
|                      |    | H16'....O8     | -0.012 | -0.015 |
|                      |    | H17'....O10    | -0.020 | 0.049  |
|                      |    | H17''....O10'  | -0.025 | -0.019 |
|                      |    | H16''....O8'   | -0.008 | 0.008  |
|                      |    |                |        |        |
| T12-KT6''-M5,3'',3'' | 1  | H15....O14     | 0.007  | 0.009  |
|                      |    | H15'....O14'   | 0.007  | 0.013  |
|                      |    | H15''....O14'' | 0.016  | 0.030  |

|  |   |                |        |        |
|--|---|----------------|--------|--------|
|  |   | H17'....O8     | -0.020 | 0.000  |
|  |   | H16....O10'    | -0.023 | -0.030 |
|  |   | H16''....O8'   | -0.022 | 0.004  |
|  |   | H16'....O12''  | -0.017 | -0.043 |
|  | 2 | H15....O14     | 0.006  | 0.004  |
|  |   | H17'....O14'   | 0.009  | 0.009  |
|  |   | H15''....O14'' | 0.017  | 0.016  |
|  |   | H16'....O8     | -0.021 | -0.032 |
|  |   | H16....O12'    | -0.017 | -0.016 |
|  |   | H16''....O10'  | -0.023 | -0.031 |
|  |   | H16'....O12''  | -0.016 | -0.014 |
|  |   |                |        |        |
|  | 3 | H17....O14     | 0.009  | 0.024  |
|  |   | H15'....O14'   | 0.007  | 0.009  |
|  |   | H15''....O14'' | 0.018  | 0.013  |
|  |   | H15....O10'    | -0.026 | -0.037 |
|  |   | H17'....O10    | -0.018 | 0.015  |
|  |   | H16'....O12''  | -0.018 | -0.028 |
|  |   | H16''....O8'   | -0.020 | -0.017 |
|  | 4 | H17....O14     | 0.009  | 0.009  |
|  |   | H17'....O14'   | 0.009  | 0.010  |
|  |   | H15''....O14'' | 0.017  | 0.017  |
|  |   | H15....O12'    | -0.017 | -0.011 |
|  |   | H17'....O10    | -0.017 | -0.022 |
|  |   | H15'....O12''  | -0.015 | -0.014 |
|  |   | H16''....O10'  | -0.023 | -0.028 |
|  | 5 | H17....O14     | 0.012  | 0.033  |
|  |   | H15'....O14'   | 0.015  | 0.012  |
|  |   | H15''....O14'' | 0.019  | 0.010  |
|  |   | H15....O10'    | -0.026 | -0.030 |
|  |   | H16....O12'    | -0.001 | 0.004  |
|  |   | H16'....O12''  | -0.015 | -0.025 |
|  |   | H16''....O8'   | -0.021 | -0.015 |
|  | 6 | H17....O14     | 0.010  | 0.009  |
|  |   | H15'....O14'   | 0.012  | 0.011  |
|  |   | H15''....O14'' | 0.017  | 0.027  |
|  |   | H15....O12'    | -0.018 | -0.009 |
|  |   | H16....O10'    | -0.022 | -0.023 |
|  |   | H16''....O8'   | -0.024 | 0.012  |
|  |   | H16'....O12''  | -0.013 | -0.026 |
|  | 7 | H17....O14     | 0.010  | 0.017  |
|  |   | H17'....O14'   | 0.009  | 0.012  |
|  |   | H15''....O14'' | 0.019  | 0.021  |

|                    |    |                |        |        |
|--------------------|----|----------------|--------|--------|
|                    |    | H15....O12'    | -0.018 | -0.013 |
|                    |    | H16....O10'    | -0.018 | -0.046 |
|                    |    | H15'....O12''  | -0.008 | -0.001 |
|                    |    | H16''....O10'  | -0.013 | -0.035 |
|                    | 8  | H17....O14     | 0.011  | 0.048  |
|                    |    | H17'....O14'   | 0.011  | 0.017  |
|                    |    | H15''....O14'' | 0.019  | 0.022  |
|                    |    | H15....O10'    | -0.026 | -0.027 |
|                    |    | H16....O12'    | -0.011 | 0.032  |
|                    |    | H16'....O10''  | -0.015 | -0.043 |
|                    |    | H15'....O12''  | -0.008 | -0.015 |
|                    |    |                |        |        |
|                    | 9  | H17....O14     | 0.010  | 0.010  |
|                    |    | H17'....O14'   | 0.008  | 0.009  |
|                    |    | H15''....O14'' | 0.019  | 0.025  |
|                    |    | H15....O12'    | -0.018 | -0.008 |
|                    |    | H16....O10'    | -0.021 | -0.005 |
|                    |    | H15'....O10''  | -0.019 | 0.005  |
|                    |    | H16'....O12''  | -0.008 | -0.019 |
|                    | 10 | H17....O14     | 0.010  | 0.012  |
|                    |    | H17'....O14'   | 0.011  | 0.017  |
|                    |    | H15''....O14'' | 0.019  | 0.014  |
|                    |    | H15....O10'    | -0.025 | -0.027 |
|                    |    | H16....O12'    | -0.009 | 0.024  |
|                    |    | H16'....O12''  | -0.012 | -0.020 |
|                    |    | H15'....O10''  | -0.019 | 0.018  |
|                    |    |                |        |        |
| T13-ET6,2''        | 1  | H15....O14     | 0.010  | 0.011  |
|                    |    | H15'....O14'   | 0.009  | 0.009  |
|                    |    | H17''....O14'' | 0.008  | 0.007  |
|                    |    | H17'....O8     | -0.018 | -0.015 |
|                    |    | H16....O10'    | -0.020 | -0.020 |
|                    |    | H16''....O8'   | -0.017 | -0.015 |
|                    |    | H16'....O12''  | -0.019 | -0.025 |
|                    |    |                |        |        |
| T13-M5,3''-ET6,2'' | 1  | H15....O14     | 0.013  | 0.014  |
|                    |    | H15'....O14'   | 0.009  | 0.010  |
|                    |    | H17''....O14'' | 0.010  | 0.009  |
|                    |    | H17'....O8     | -0.015 | -0.010 |
|                    |    | H16....O10'    | -0.018 | -0.021 |
|                    |    | H16''....O8'   | -0.015 | -0.011 |
|                    |    | H16'....O12''  | -0.016 | -0.024 |
|                    |    |                |        |        |

|                  |            |              |        |        |
|------------------|------------|--------------|--------|--------|
| T14-ET6,2"       | 1          | H15....O14   | 0.013  | 0.011  |
|                  |            | H15'....O14' | 0.010  | 0.013  |
|                  |            | H17"....O14" | 0.010  | 0.028  |
|                  |            | H17'....O8   | -0.018 | -0.015 |
|                  |            | H16....O10'  | -0.021 | -0.018 |
|                  |            | H16"....O8'  | -0.017 | -0.013 |
|                  |            | H16'....O12" | -0.019 | -0.026 |
|                  |            |              |        |        |
| T14-M5,3"-ET6,2" | 1          | H15....O14   | 0.022  | 0.018  |
|                  |            | H15'....O14' | 0.017  | 0.013  |
|                  |            | H17"....O14" | 0.021  | 0.018  |
|                  |            | H17'....O8   | 0.003  | -0.014 |
|                  |            | H16....O10'  | -0.020 | -0.015 |
|                  |            | H16"....O8'  | 0.005  | -0.013 |
|                  |            | H16'....O12" | -0.026 | -0.015 |
|                  | l-y-out-in | H15....O14   |        | 0.015  |
|                  |            | H15'....O14' |        | 0.013  |
|                  |            | H17"....O14" |        | 0.010  |
|                  |            | H17'....O8   |        | -0.011 |
|                  |            | H16....O10'  |        | -0.018 |
|                  |            | H16"....O8'  |        | -0.013 |
|                  |            | H16'....O12" |        | -0.025 |

**Table S 14****Bond lengths of the C–H···O intramolecular hydrogen bonds in selected trimeric acylphloroglucinols**

DFT/B3LYP/6-31+G(d,p) without Grimme's correction and DFT/B3LYP/6-31+G(d,p) with Grimme's correction results in vacuo, respectively denoted as DFT and DFT-D3 in the columns' headings. The conformers-pair numbered as 1 is considered for each of the selected molecules.

| IHB considered                           | Length of given IHB (Å) |        |                       |        |
|------------------------------------------|-------------------------|--------|-----------------------|--------|
|                                          | outstretched conformer  |        | bowl-shaped conformer |        |
|                                          | DFT                     | DFT-D3 | DFT                   | DFT-D3 |
|                                          |                         |        |                       |        |
| <b>structure T1</b>                      |                         |        |                       |        |
| H13 <sub>a</sub> ···O14                  | 2.416                   | 2.421  | 2.416                 | 2.421  |
| H13 <sub>b</sub> ···O12                  | 2.496                   | 2.483  | 2.499                 | 2.481  |
| H13 <sub>c</sub> ···O12                  | 2.497                   | 2.481  | 2.496                 | 2.484  |
| H13 <sub>a</sub> '···O14'                | 2.406                   | 2.412  | 2.406                 | 2.411  |
| H13 <sub>b</sub> '···O12'                | 2.467                   | 2.460  | 2.470                 | 2.457  |
| H13 <sub>c</sub> '···O12'                | 2.476                   | 2.454  | 2.474                 | 2.458  |
| H13 <sub>a</sub> ''···O14''              | 2.415                   | 2.421  | 2.415                 | 2.421  |
| H13 <sub>a</sub> ''···O14''              | 2.496                   | 2.479  | 2.496                 | 2.480  |
| H13 <sub>a</sub> ''···O14''              | 2.494                   | 2.482  | 2.495                 | 2.481  |
| <b>structure T4-KT2,6''-M5,5,3'',3''</b> |                         |        |                       |        |
| H19 <sub>a</sub> ···O14                  | 2.701                   | 2.690  | 2.700                 | 2.704  |
| H19 <sub>b</sub> ···O14                  | 2.719                   | 2.703  | 2.719                 | 2.690  |
| H11 <sub>a</sub> ···O12                  | 2.572                   | 2.565  | 2.537                 | 2.529  |
| H11 <sub>b</sub> ···O12                  | 2.534                   | 2.526  | 2.570                 | 2.565  |
| H11 <sub>c</sub> ···O10                  | 2.551                   | 2.540  | 2.519                 | 2.509  |
| H11 <sub>d</sub> ···O10                  | 2.515                   | 2.507  | 2.556                 | 2.540  |
| H13 <sub>a</sub> ···O8                   | 2.458                   | 2.448  | 2.460                 | 2.449  |
| H13 <sub>b</sub> ···O8                   | 2.466                   | 2.451  | 2.465                 | 2.450  |
| H19 <sub>a</sub> '···O14'                | 2.654                   | 2.651  | 2.653                 | 2.648  |
| H19 <sub>b</sub> '···O14'                | 2.661                   | 2.648  | 2.662                 | 2.651  |
| H13 <sub>a</sub> '···O12'                | 2.418                   | 2.409  | 2.418                 | 2.408  |
| H13 <sub>b</sub> '···O12'                | 2.420                   | 2.410  | 2.421                 | 2.411  |
| H13 <sub>a</sub> ''···O14''              | 2.426                   | 2.433  | 2.427                 | 2.427  |
| H13 <sub>b</sub> ''···O12''              | 2.514                   | 2.511  | 2.519                 | 2.497  |
| H13 <sub>c</sub> ''···O12''              | 2.537                   | 2.497  | 2.533                 | 2.500  |
| H9 <sub>a</sub> ''···O8''                | 2.538                   | 2.528  | 2.541                 | 2.538  |



|                            |       |       |       |       |
|----------------------------|-------|-------|-------|-------|
| H9 <sub>b</sub> "....O8"   | 2.581 | 2.574 | 2.578 | 2.563 |
| H9 <sub>c</sub> "....O10"  | 2.519 | 2.509 | 2.522 | 2.521 |
| H9 <sub>d</sub> "....O10"  | 2.553 | 2.543 | 2.552 | 2.533 |
| <b>structure T7</b>        |       |       |       |       |
| H19 <sub>a</sub> ....O14   | 2.662 | 2.652 | 2.662 | 2.548 |
| H19 <sub>b</sub> ....O14   | 2.664 | 2.654 | 2.663 | 2.582 |
| H13 <sub>a</sub> ....O12   | 2.439 | 2.429 | 2.439 | 2.486 |
| H13 <sub>b</sub> ....O12   | 2.438 | 2.428 | 2.438 | 2.370 |
| H19 <sub>a</sub> '....O14' | 2.653 | 2.646 | 2.649 | 2.641 |
| H19 <sub>b</sub> '....O14' | 2.658 | 2.648 | 2.660 | 2.652 |
| H13 <sub>a</sub> '....O12' | 2.410 | 2.402 | 2.410 | 2.404 |
| H13 <sub>b</sub> '....O12' | 2.414 | 2.405 | 2.414 | 2.405 |
| H13 <sub>a</sub> "....O14" | 2.653 | 2.421 | 2.415 | 2.421 |
| H13 <sub>b</sub> "....O8"  | 2.658 | 2.481 | 2.496 | 2.482 |
| H13 <sub>c</sub> "....O8"  | 2.493 | 2.483 | 2.494 | 2.483 |
| <b>structure T9</b>        |       |       |       |       |
| H19 <sub>a</sub> ....O14   | 2.661 | 2.652 | 2.662 | 2.652 |
| H19 <sub>b</sub> ....O14   | 2.664 | 2.655 | 2.663 | 2.654 |
| H13 <sub>a</sub> ....O12   | 2.439 | 2.430 | 2.439 | 2.430 |
| H13 <sub>b</sub> ....O12   | 2.438 | 2.430 | 2.438 | 2.430 |
| H19 <sub>a</sub> '....O14' | 2.657 | 2.646 | 2.660 | 2.651 |
| H19 <sub>b</sub> '....O14' | 2.653 | 2.648 | 2.650 | 2.642 |
| H13 <sub>a</sub> '....O12' | 2.411 | 2.402 | 2.411 | 2.402 |
| H13 <sub>b</sub> '....O12' | 2.414 | 2.405 | 2.415 | 2.405 |
| H19 <sub>a</sub> "....O14" | 2.664 | 2.654 | 2.664 | 2.655 |
| H19 <sub>b</sub> "....O14" | 2.661 | 2.652 | 2.661 | 2.652 |
| H13 <sub>a</sub> "....O8"  | 2.436 | 2.428 | 2.437 | 2.427 |
| H13 <sub>b</sub> "....O8"  | 2.437 | 2.429 | 2.437 | 2.429 |
| <b>structure T9-M5,3"</b>  |       |       |       |       |
| H19 <sub>a</sub> ....O14   | 2.662 | 2.656 | 2.661 | 2.653 |
| H19 <sub>b</sub> ....O14   | 2.657 | 2.647 | 2.658 | 2.646 |
| H13 <sub>a</sub> ....O12   | 2.427 | 2.420 | 2.429 | 2.421 |
| H13 <sub>b</sub> ....O12   | 2.430 | 2.421 | 2.428 | 2.419 |
| H11 <sub>a</sub> ....O10   | 2.298 | 2.304 | 2.297 | 2.303 |
| H19 <sub>a</sub> '....O14' | 2.656 | 2.646 | 2.650 | 2.643 |
| H19 <sub>b</sub> '....O14' | 2.653 | 2.646 | 2.659 | 2.650 |
| H13 <sub>a</sub> '....O12' | 2.411 | 2.402 | 2.409 | 2.402 |
| H13 <sub>b</sub> '....O12' | 2.413 | 2.404 | 2.415 | 2.404 |

|                            |       |       |       |       |
|----------------------------|-------|-------|-------|-------|
| H19 <sub>a</sub> "....O14" | 2.656 | 2.647 | 2.661 | 2.652 |
| H19 <sub>b</sub> "....O14" | 2.661 | 2.652 | 2.657 | 2.647 |
| H13 <sub>a</sub> "....O8"  | 2.428 | 2.419 | 2.428 | 2.419 |
| H13 <sub>b</sub> "....O8"  | 2.426 | 2.417 | 2.427 | 2.418 |
| H9 <sub>a</sub> "....O10"  | 2.294 | 2.301 | 2.298 | 2.303 |

**Table S 15****HOMO-LUMO energy difference of selected calculated conformers of trimeric acylphloroglucinols**

The table reports the HF/6-31G(d,p), HF/6-31+G(d,p), DFT/B3LYP/6-31+G(d,p), and DFT/B3LYP/6-31+G(d,p) with the Grimme' correction results, respectively denoted as HF, HF+, DFT and DFT-D3 in the column headings.

For each molecule, the conformers are listed in order of increasing relative energy in the DFT/B3LYP/6-31+G(d,p) results.

| conformers                            | HOMO-LUMO energy difference (kcal/mol) |        |       |        |
|---------------------------------------|----------------------------------------|--------|-------|--------|
|                                       | HF                                     | HF+    | DFT   | DFT-D3 |
| <b>structure T1</b>                   |                                        |        |       |        |
| 1                                     | 252.76                                 | 231.47 | 97.46 | 97.22  |
| 1-y                                   | 252.77                                 | 230.44 | 97.55 | 97.28  |
| 2                                     | 251.83                                 | 228.80 | 96.71 | 96.36  |
| 2-y                                   | 251.89                                 | 228.63 | 96.98 | 95.88  |
| 3                                     | 251.46                                 | 227.27 | 95.83 | 95.73  |
| 3-y                                   | 251.02                                 | 227.45 | 95.48 | 95.39  |
| 4                                     | 247.68                                 | 231.46 | 93.05 | 92.91  |
| 4-y                                   | 247.80                                 | 230.14 | 93.17 | 92.99  |
| 5                                     | 247.09                                 | 228.95 | 92.61 | 92.34  |
| 6                                     | 251.66                                 | 225.83 | 96.80 | 96.67  |
| 5-y                                   | 413.30                                 | 228.87 | 93.10 | 92.37  |
| 7                                     | 246.13                                 | 227.85 | 91.11 | 91.08  |
| 7-y                                   | 245.44                                 | 228.54 | 90.49 | 90.42  |
| 8                                     | 251.94                                 | 229.35 | 0.00  | 0.00   |
| 8-y                                   | 251.13                                 | 228.78 | 98.17 | 97.99  |
| 6-y                                   | 250.96                                 | 226.65 | 96.14 | 96.00  |
| 9                                     | 248.33                                 | 232.71 | 93.43 | 93.30  |
| 10-y                                  | 250.90                                 | 228.24 | 97.14 | 96.82  |
| 10                                    | 251.05                                 | 227.57 | 97.63 | 97.51  |
| 9-y                                   | 247.81                                 | 232.28 | 93.06 | 93.03  |
| 17-y                                  | 226.19                                 | 201.12 | 67.01 | 67.76  |
| 17                                    | 221.75                                 | 197.92 | 63.37 | 63.10  |
| <b>structure T2-KT2,6"-M5,5,3",3"</b> |                                        |        |       |        |
| 1                                     | 246.65                                 | 231.24 | 89.87 | 89.72  |
| 1-y                                   | 246.45                                 | 230.76 | 89.62 | 89.20  |
| <b>structure T3-ET6,2"</b>            |                                        |        |       |        |
| 1                                     | 251.89                                 | 231.95 | 96.91 | 96.74  |
| 1-y                                   | 251.93                                 | 231.17 | 96.89 | 96.60  |

|                                       |        |        |       |       |
|---------------------------------------|--------|--------|-------|-------|
| <b>structure T3-M5,3"-ET6,2"</b>      |        |        |       |       |
| 1                                     | 250.93 | 233.07 | 96.12 | 96.01 |
| 1-y                                   | 251.02 | 232.98 | 96.20 | 95.96 |
| <b>structure T4-KT2,6"-M5,5,3",3"</b> |        |        |       |       |
| 1                                     | 246.57 | 231.13 | 89.77 | 89.60 |
| 1-y                                   | 246.38 | 230.63 | 89.51 | 89.09 |
| <b>structure T5-KT2,6"-M5,5,3",3"</b> |        |        |       |       |
| 1                                     | 246.91 | 230.89 | 90.32 | 90.11 |
| 1-y                                   | 246.72 | 230.31 | 90.10 | 89.41 |
| <b>structure T5-KT6"-M3",3"-ET4</b>   |        |        |       |       |
| 1                                     | 244.40 | 225.48 | 88.52 | 88.43 |
| 1-y                                   | 244.66 | 225.96 | 88.65 | 88.57 |
| <b>structure T6-M5,3"-ET6,4"</b>      |        |        |       |       |
| 3                                     | 244.13 | 223.91 | 91.65 | 91.70 |
| 3-y                                   | 244.52 | 223.76 | 92.04 | 92.16 |
| 3-y-in-out                            | 244.91 | 224.04 | 92.55 | 92.68 |
| 3-y-in-in                             | 241.10 | 222.97 | 88.59 | 88.14 |
| <b>structure T7</b>                   |        |        |       |       |
| 1                                     | 252.97 | 230.89 | 97.06 | 96.84 |
| 1-y                                   | 252.67 | 229.94 | 97.26 | 96.99 |
| 2                                     | 251.69 | 228.78 | 96.24 | 95.91 |
| 2-y                                   | 252.49 | 228.47 | 96.54 | 94.79 |
| 4                                     | 248.41 | 230.73 | 94.06 | 93.87 |
| 3                                     | 252.06 | 227.01 | 95.37 | 95.26 |
| 3-y                                   | 251.62 | 227.10 | 95.04 | 94.93 |
| 4-y                                   | 248.50 | 229.03 | 94.18 | 93.94 |
| 5                                     | 248.12 | 228.82 | 94.06 | 93.74 |
| 5-y                                   | 248.42 | 228.61 | 94.56 | 94.02 |
| 6                                     | 252.19 | 226.02 | 97.84 | 97.61 |
| 6-y                                   | 251.42 | 226.96 | 97.14 | 96.82 |
| <b>structure T7-ET6,2"</b>            |        |        |       |       |
| 1                                     | 252.39 | 231.93 | 96.86 | 96.64 |
| 1-y                                   | 252.12 | 231.09 | 96.98 | 96.67 |
| <b>structure T7-M5,3"-ET6,2"</b>      |        |        |       |       |
| 1                                     | 251.13 | 233.17 | 96.70 | 96.57 |
| 1-y                                   | 250.82 | 232.78 | 96.42 | 96.35 |
| <b>structure T7-KT6"-M5,3",3"</b>     |        |        |       |       |

|                                       |        |        |       |       |
|---------------------------------------|--------|--------|-------|-------|
| 1                                     | 245.81 | 229.71 | 89.95 | 89.66 |
| 1-y                                   | 245.86 | 228.48 | 89.93 | 89.47 |
| 2                                     | 247.62 | 229.77 | 91.27 | 91.25 |
| 2-y                                   | 247.33 | 229.02 | 90.81 | 90.84 |
| 3                                     | 242.63 | 225.38 | 86.68 | 86.28 |
| 3-y                                   | 243.60 | 226.10 | 87.93 | 87.56 |
| 4                                     | 243.17 | 222.64 | 87.00 | 86.89 |
| 4-y                                   | 243.24 | 222.91 | 86.93 | 87.04 |
| <b>structure T7-KT2,6"-M5,5,3",3"</b> |        |        |       |       |
| 1                                     | 246.53 | 230.68 | 89.71 | 89.56 |
| 1-y                                   | 246.35 | 230.28 | 89.49 | 89.05 |
| <b>structure T8-KT6"-M5,3",3"</b>     |        |        |       |       |
| 1                                     | 246.17 | 229.66 | 90.56 | 90.20 |
| 1-y                                   | 246.20 | 228.26 | 90.53 | 89.94 |
| 2                                     | 247.97 | 229.71 | 91.87 | 91.80 |
| 2-y                                   | 247.67 | 228.91 | 91.45 | 91.40 |
| 3                                     | 243.04 | 225.41 | 87.34 | 86.90 |
| 3-y                                   | 244.06 | 226.14 | 88.67 | 87.95 |
| 4                                     | 243.57 | 222.71 | 87.68 | 87.52 |
| 4-y                                   | 243.62 | 222.94 | 87.59 | 87.66 |
| <b>structure T8-KT2-M5,5,3"</b>       |        |        |       |       |
| 1                                     | 246.28 | 229.74 | 90.69 | 90.32 |
| 1-y                                   | 246.31 | 228.43 | 90.66 | 90.12 |
| 2                                     | 248.07 | 229.59 | 91.97 | 91.88 |
| 2-y                                   | 247.78 | 228.63 | 91.54 | 91.49 |
| 3-y                                   | 243.54 | 225.93 | 88.65 | 88.13 |
| 4                                     | 243.71 | 222.87 | 87.88 | 87.69 |
| 3                                     | 242.80 | 225.06 | 87.15 | 86.77 |
| 4-y                                   | 243.78 | 222.95 | 87.77 | 87.82 |
| <b>structure T8-KT2,6"-M5,5,3",3"</b> |        |        |       |       |
| 1                                     | 246.87 | 230.75 | 90.30 | 90.09 |
| 1-y                                   | 246.69 | 230.23 | 90.07 | 89.37 |
| <b>structure T9</b>                   |        |        |       |       |
| 1                                     | 253.04 | 231.09 | 98.05 | 97.75 |
| 1-y                                   | 253.06 | 229.93 | 98.14 | 97.80 |
| 2                                     | 252.21 | 228.58 | 97.34 | 96.94 |
| 4                                     | 248.27 | 230.97 | 93.91 | 93.72 |
| 2-y                                   | 252.42 | 228.55 | 97.75 | 95.21 |
| 3                                     | 251.84 | 226.89 | 96.48 | 96.30 |
| 3-y                                   | 251.39 | 226.91 | 96.12 | 95.96 |

|                                     |        |        |       |       |
|-------------------------------------|--------|--------|-------|-------|
| 4-y                                 | 248.39 | 229.04 | 94.02 | 93.79 |
| 5                                   | 247.88 | 228.56 | 93.61 | 93.30 |
| 5-y                                 | 247.94 | 228.61 | 94.29 | 94.24 |
| 6                                   | 252.06 | 225.90 | 97.52 | 97.31 |
| 6-y                                 | 251.31 | 226.82 | 96.87 | 96.69 |
| <b>structure T9-M5,3"</b>           |        |        |       |       |
| 1                                   | 252.61 | 229.11 | 97.99 | 97.64 |
| 1-y                                 | 252.43 | 227.92 | 97.83 | 97.33 |
| 2                                   | 249.79 | 226.17 | 95.24 | 94.88 |
| 2-y                                 | 250.21 | 226.29 | 95.76 | 95.41 |
| 3                                   | 249.67 | 223.85 | 94.85 | 94.70 |
| 3-y                                 | 249.40 | 223.00 | 94.65 | 94.60 |
| 4                                   | 247.40 | 229.26 | 93.56 | 93.34 |
| 4-y                                 | 247.19 | 226.39 | 93.40 | 93.06 |
| 6                                   | 249.44 | 223.36 | 94.99 | 94.87 |
| 6-y                                 | 248.76 | 224.22 | 94.38 | 94.68 |
| 5                                   | 245.28 | 226.07 | 91.52 | 91.26 |
| 5-y                                 | 245.96 | 226.50 | 92.53 | 92.55 |
| <b>structure T9-ET6,2"</b>          |        |        |       |       |
| 1                                   | 252.45 | 232.17 | 97.82 | 97.53 |
| 1-y                                 | 252.40 | 231.51 | 97.85 | 97.50 |
| <b>structure T9-M5,3"-ET6,2"</b>    |        |        |       |       |
| 1                                   | 251.36 | 233.04 | 96.74 | 96.51 |
| 1-y                                 | 251.44 | 232.62 | 97.02 | 96.64 |
| <b>structure T9-M5,3"-ET6,4"</b>    |        |        |       |       |
| 3                                   | 244.16 | 223.63 | 91.64 | 91.67 |
| 3-y                                 | 244.58 | 223.59 | 92.07 | 92.14 |
| 3-y-in-out                          | 244.98 | 223.86 | 0.00  | 92.66 |
| 3-y-in-in                           | 241.16 | 222.90 | 88.61 | 88.13 |
| <b>structure T9-KT6"-M5,3",3"</b>   |        |        |       |       |
| 1                                   | 246.24 | 229.69 | 90.62 | 90.26 |
| 1-y                                 | 246.27 | 228.46 | 90.61 | 90.09 |
| 2                                   | 248.04 | 229.70 | 91.94 | 91.85 |
| 2-y                                 | 247.74 | 228.83 | 91.51 | 91.44 |
| 3                                   | 243.13 | 225.54 | 87.46 | 88.25 |
| 4                                   | 243.66 | 222.80 | 91.51 | 87.62 |
| 4-y                                 | 243.71 | 222.90 | 87.70 | 87.74 |
| 3-y                                 | 244.28 | 226.14 | 88.77 | 86.95 |
| <b>structure T9-KT6"-M3",3"-ET4</b> |        |        |       |       |

|                                        |        |        |       |       |
|----------------------------------------|--------|--------|-------|-------|
| 1                                      | 244.43 | 225.36 | 88.57 | 88.45 |
| 1-y                                    | 244.68 | 225.80 | 88.71 | 88.60 |
| <b>structure T9-KT6"-M5,3",3"-ET6</b>  |        |        |       |       |
| 1                                      | 248.61 | 231.34 | 92.31 | 92.26 |
| 1-y                                    | 248.44 | 231.22 | 91.63 | 91.54 |
| <b>structure T9-KT2,6"-M5,5,3",3"</b>  |        |        |       |       |
| 1                                      | 246.94 | 230.92 | 90.35 | 90.14 |
| 1-y                                    | 246.75 | 230.60 | 90.14 | 89.43 |
| <b>structure T10</b>                   |        |        |       |       |
| 1                                      | 251.38 | 230.10 | 96.33 | 96.27 |
| 1-y                                    | 251.25 | 228.46 | 96.39 | 96.23 |
| 2-y                                    | 250.63 | 228.01 | 96.03 | 94.94 |
| 4                                      | 246.60 | 230.05 | 92.80 | 92.69 |
| 2                                      | 250.70 | 228.85 | 95.71 | 95.49 |
| 3-y                                    | 249.90 | 226.98 | 94.30 | 94.30 |
| 3                                      | 250.19 | 227.12 | 94.62 | 94.57 |
| 4-y                                    | 246.64 | 227.77 | 92.92 | 92.76 |
| 5-y                                    | 246.12 | 228.18 | 93.10 | 92.16 |
| 5                                      | 246.04 | 229.02 | 92.55 | 92.30 |
| 6-y                                    | 250.29 | 226.38 | 95.11 | 95.11 |
| 6                                      | 250.75 | 226.73 | 95.78 | 95.68 |
| <b>structure T10-ET6,2"</b>            |        |        |       |       |
| 1                                      | 250.90 | 231.31 | 96.07 | 95.98 |
| 1-y                                    | 250.60 | 230.04 | 96.13 | 95.98 |
| <b>structure T10-M5,3"-ET6,2"</b>      |        |        |       |       |
| 1                                      | 250.99 | 232.21 | 94.83 | 95.00 |
| 1-y                                    | 251.09 | 232.33 | 95.07 | 94.93 |
| <b>structure T10-M5,3"-ET6,2",6"</b>   |        |        |       |       |
| 1                                      | 250.68 | 231.17 | 95.78 | 95.70 |
| 1-y                                    | 251.64 | 231.21 | 96.57 | 96.34 |
| <b>structure T10-KT2,6"-M5,5,3",3"</b> |        |        |       |       |
| 1-y                                    | 247.00 | 230.65 | 90.36 | 89.37 |
| 1                                      | 247.11 | 230.62 | 90.64 | 90.47 |
| <b>structure T11-ET6,2"</b>            |        |        |       |       |
| 1                                      | 251.02 | 231.51 | 96.21 | 96.13 |
| 1-y                                    | 250.90 | 230.26 | 96.25 | 96.40 |
| <b>structure T11-M5,3"-ET6,2"</b>      |        |        |       |       |

|                                    |          |         |          |         |
|------------------------------------|----------|---------|----------|---------|
| 1                                  | 250.97   | 232.76  | 94.87    | 95.02   |
| 1-y                                | 250.80   | 232.79  | 95.94    | 95.64   |
| 1-y-out-in                         | 250.73   | 232.09  | 95.27    | 95.14   |
| <b>structure T12-KT2-M5,5,3"</b>   |          |         |          |         |
| 1                                  | 246.30   | 229.56  | 90.70    | 90.34   |
| 1-y                                | 246.32   | 228.29  | 90.69    | 90.25   |
| 2                                  | 248.08   | 229.62  | 92.01    | 91.91   |
| 2-y                                | 407.92   | 228.76  | 91.56    | 91.51   |
| 3                                  | 243.20   | 225.40  | 87.52    | 87.02   |
| 4                                  | 243.72   | 222.78  | 87.87    | 87.69   |
| 4-y                                | 243.77   | 222.91  | 87.76    | 87.79   |
| 3-y                                | 244.28   | 226.08  | 88.87    | 88.35   |
| <b>structure T12-KT6"-M5,3",3"</b> |          |         |          |         |
| 1                                  | 246.22   | 229.68  | 90.60    | 90.24   |
| 1-y                                | 246.25   | 228.61  | 90.59    | 90.05   |
| 2                                  | 248.01   | 229.46  | 91.94    | 91.84   |
| 2-y                                | 247.71   | 228.62  | 91.48    | 91.42   |
| 3                                  | 243.08   | 225.31  | 87.41    | 86.90   |
| 3-y                                | 244.06   | 226.21  | 88.77    | 87.95   |
| 4                                  | 243.63   | 222.65  | 87.68    | 87.58   |
| 4-y                                | 243.69   | 222.69  | 87.76    | 87.72   |
| <b>structure T13-ET6,2"</b>        |          |         |          |         |
| 1                                  | 251.86   | 231.93  | 97.14    | 97.15   |
| 1-y                                | 251.41   | 231.26  | 96.67    | 96.69   |
| <b>structure T13-M5,3"-ET6,2"</b>  |          |         |          |         |
| 1                                  | 251.54   | 233.28  | 96.57    | 96.41   |
| 1-y                                | 251.50   | 232.96  | 96.35    | 96.35   |
| <b>structure T14-ET6,2"</b>        |          |         |          |         |
| 1                                  | -0.30251 | 0.09737 | -0.30838 | 0.06011 |
| 1-y                                | -0.30197 | 0.09757 | -0.30801 | 0.05913 |
| <b>structure T14-M5,3"-ET6,2"</b>  |          |         |          |         |
| 1                                  | 251.16   | 232.80  | 94.72    | 94.85   |
| 1-y                                | 251.34   | 232.86  | 95.78    | 95.09   |
| 1-y-out-in                         | 251.21   | 232.32  | 95.16    | 94.99   |



**Table S 16****Dipole moment of the calculated conformers of trimeric acylphloroglucinols**

The table reports the HF/6-31G(d,p), HF/6-31+G(d,p), DFT/B3LYP/6-31+G(d,p), and DFT/B3LYP/6-31+G(d,p) with the Grimme' correction results, respectively denoted as HF, HF+, DFT and DFT-D3 in the column headings.

For each molecule, the conformers are listed in order of increasing relative energy in the DFT/B3LYP/6-31+G(d,p) results.

| conformers                            | dipole moment (debye) |         |         |         |
|---------------------------------------|-----------------------|---------|---------|---------|
|                                       | HF                    | HF+     | DFT     | DFT-D3  |
| <b>structure T1</b>                   |                       |         |         |         |
| 1                                     | 2.5513                | 2.6417  | 2.8462  | 2.7634  |
| 1-y                                   | 5.1004                | 5.1456  | 5.2126  | 5.3679  |
| 2                                     | 5.5914                | 5.7435  | 5.8600  | 5.9867  |
| 2-y                                   | 1.9269                | 1.9857  | 2.3392  | 1.8843  |
| 3                                     | 7.4533                | 7.6551  | 7.9817  | 7.9639  |
| 3-y                                   | 5.4965                | 5.6080  | 6.0743  | 5.8185  |
| 4                                     | 5.0273                | 5.1430  | 5.3400  | 5.2266  |
| 4-y                                   | 6.0469                | 6.1649  | 6.5604  | 6.5229  |
| 5                                     | 4.4844                | 4.7046  | 4.9252  | 5.0350  |
| 6                                     | 3.0801                | 3.0490  | 3.2908  | 3.2355  |
| 5-y                                   | 1.8412                | 2.0225  | 1.4459  | 1.8463  |
| 7                                     | 7.1630                | 7.3587  | 7.7992  | 7.7267  |
| 7-y                                   | 6.1018                | 6.2216  | 6.4344  | 6.2145  |
| 8                                     | 6.1765                | 6.2716  |         |         |
| 8-y                                   | 2.5565                | 2.6265  | 2.6377  | 2.4603  |
| 6-y                                   | 6.4138                | 6.6943  | 6.6479  | 6.8416  |
| 9                                     | 3.0803                | 3.3621  | 3.8353  | 3.7577  |
| 10-y                                  | 6.7104                | 6.9026  | 7.2999  | 6.8746  |
| 10                                    | 8.6421                | 8.8568  | 9.0546  | 8.9750  |
| 9-y                                   | 4.6136                | 4.7448  | 5.1556  | 5.1778  |
| 17-y                                  | 15.8604               | 16.0138 | 17.9541 | 17.0390 |
| 17                                    | 20.9513               | 21.0477 | 22.0386 | 22.0221 |
| <b>structure T2-KT2,6"-M5,5,3",3"</b> |                       |         |         |         |
| 1                                     | 1.8875                | 1.8654  | 1.6726  | 1.7032  |
| 1-y                                   | 1.7859                | 1.7704  | 1.5460  | 1.5462  |
| <b>structure T3-ET6,2"</b>            |                       |         |         |         |
| 1                                     | 2.8804                | 2.9385  | 3.1457  | 3.0491  |
| 1-y                                   | 6.4596                | 6.6329  | 6.5106  | 6.8887  |

|                                       |        |        |        |        |
|---------------------------------------|--------|--------|--------|--------|
| <b>structure T3-M5,3"-ET6,2"</b>      |        |        |        |        |
| 1                                     | 3.6304 | 3.5826 | 3.7202 | 3.6872 |
| 1-y                                   | 4.5412 | 4.7332 | 4.5044 | 4.6872 |
| <b>structure T4-KT2,6"-M5,5,3",3"</b> |        |        |        |        |
| 1                                     | 1.7759 | 1.6925 | 1.4550 | 1.4827 |
| 1-y                                   | 1.6895 | 1.6041 | 1.3561 | 1.3581 |
| <b>structure T5-KT2,6"-M5,5,3",3"</b> |        |        |        |        |
| 1                                     | 1.9010 | 1.8643 | 1.7137 | 1.7357 |
| 1-y                                   | 1.8253 | 1.7796 | 1.6134 | 1.5285 |
| <b>structure T5-KT6"-M3",3"-ET4</b>   |        |        |        |        |
| 1                                     | 6.0287 | 6.0681 | 6.1751 | 6.1557 |
| 1-y                                   | 5.8237 | 5.9249 | 5.9234 | 5.8088 |
| <b>structure T6-M5,3"-ET6,4"</b>      |        |        |        |        |
| 3                                     | 7.2728 | 7.5604 | 7.8690 | 7.8233 |
| 3-y                                   | 5.6033 | 5.7610 | 6.3346 | 6.0706 |
| 3-y-in-out                            | 3.5091 | 3.7851 | 4.1896 | 3.8734 |
| 3-y-in-in                             | 6.5077 | 6.8289 | 6.7901 | 6.3041 |
| <b>structure T7</b>                   |        |        |        |        |
| 1                                     | 2.5914 | 2.6787 | 2.2270 | 2.1459 |
| 1-y                                   | 4.8559 | 4.8224 | 4.8755 | 5.0466 |
| 2                                     | 5.4660 | 5.7489 | 5.7088 | 5.8258 |
| 2-y                                   | 1.9610 | 2.0419 | 2.5118 | 2.3210 |
| 4                                     | 5.2307 | 5.3404 | 5.5986 | 5.4872 |
| 3                                     | 7.2445 | 7.4288 | 7.4139 | 7.4176 |
| 3-y                                   | 5.2664 | 5.3508 | 5.5286 | 5.2889 |
| 4-y                                   | 6.2898 | 6.4115 | 6.7889 | 6.7639 |
| 5                                     | 4.7039 | 4.9387 | 5.1202 | 5.2553 |
| 5-y                                   | 1.8253 | 2.0280 | 1.5547 | 2.1315 |
| 6                                     | 3.0364 | 3.0113 | 3.2991 | 3.2302 |
| 6-y                                   | 6.1932 | 6.4183 | 6.4648 | 6.7747 |
| <b>structure T7-ET6,2"</b>            |        |        |        |        |
| 1                                     | 3.0163 | 3.1683 | 2.7889 | 2.6781 |
| 1-y                                   | 6.2722 | 6.4578 | 6.2419 | 6.4709 |
| <b>structure T7-M5,3"-ET6,2"</b>      |        |        |        |        |
| 1                                     | 3.5896 | 3.6876 | 3.8735 | 3.8035 |
| 1-y                                   | 4.5115 | 4.7305 | 4.7835 | 4.9747 |
| <b>structure T7-KT6"-M5,3",3"</b>     |        |        |        |        |

|                                       |        |        |        |        |
|---------------------------------------|--------|--------|--------|--------|
| 1                                     | 2.6831 | 2.7757 | 2.9590 | 2.9379 |
| 1-y                                   | 2.8726 | 2.8281 | 3.1293 | 3.1656 |
| 2                                     | 3.5574 | 3.7190 | 3.5704 | 3.6328 |
| 2-y                                   | 3.4897 | 3.5331 | 3.4595 | 3.5346 |
| 3                                     | 3.7757 | 3.8144 | 3.8546 | 3.9335 |
| 3-y                                   | 3.4156 | 3.5846 | 3.4933 | 3.3801 |
| 4                                     | 5.3194 | 5.3143 | 5.3507 | 5.3654 |
| 4-y                                   | 5.2220 | 5.2973 | 5.2242 | 5.1405 |
| <b>structure T7-KT2,6"-M5,5,3",3"</b> |        |        |        |        |
| 1                                     | 1.7414 | 1.6451 | 1.4039 | 1.4262 |
| 1-y                                   | 1.6634 | 1.5617 | 1.3155 | 1.3280 |
| <b>structure T8-KT6"-M5,3",3"</b>     |        |        |        |        |
| 1                                     | 2.7044 | 2.8133 | 3.0749 | 3.0332 |
| 1-y                                   | 3.0096 | 3.0129 | 3.3633 | 3.3875 |
| 2                                     | 3.4157 | 3.5173 | 3.3193 | 3.3782 |
| 2-y                                   | 3.4685 | 3.4747 | 3.3656 | 3.4735 |
| 3                                     | 3.7568 | 3.7702 | 3.7778 | 3.8716 |
| 3-y                                   | 3.2747 | 3.3987 | 3.2435 | 3.1859 |
| 4                                     | 5.3821 | 5.3876 | 5.4637 | 5.4755 |
| 4-y                                   | 5.2009 | 5.2623 | 5.2420 | 5.1257 |
| <b>structure T8-KT2-M5,5,3"</b>       |        |        |        |        |
| 1                                     | 2.7847 | 2.9168 | 3.1927 | 3.1415 |
| 1-y                                   | 3.1405 | 3.1904 | 3.5235 | 3.4555 |
| 2                                     | 3.3434 | 3.4206 | 3.2221 | 3.2763 |
| 2-y                                   | 3.4685 | 3.4726 | 3.3389 | 3.4782 |
| 3-y                                   | 3.5058 | 3.6803 | 3.2663 | 3.1524 |
| 4                                     | 5.4673 | 5.5127 | 5.5914 | 5.5948 |
| 3                                     | 3.8679 | 3.9491 | 3.9361 | 4.0859 |
| 4-y                                   | 5.2318 | 5.3163 | 5.3224 | 5.1805 |
| <b>structure T8-KT2,6"-M5,5,3",3"</b> |        |        |        |        |
| 1                                     | 1.8656 | 1.8167 | 1.6591 | 1.6802 |
| 1-y                                   | 1.8013 | 1.7418 | 1.5815 | 1.5075 |
| <b>structure T9</b>                   |        |        |        |        |
| 1                                     | 2.3829 | 2.4149 | 2.5909 | 2.5052 |
| 1-y                                   | 4.9068 | 4.9242 | 5.0409 | 5.2028 |
| 2                                     | 5.3527 | 5.4385 | 5.6085 | 5.7285 |
| 4                                     | 5.0643 | 5.1433 | 5.3905 | 5.2732 |
| 2-y                                   | 1.7570 | 1.7752 | 2.1573 | 2.3315 |
| 3                                     | 7.0525 | 7.1395 | 7.4798 | 7.4711 |
| 3-y                                   | 5.1633 | 5.1548 | 5.6072 | 5.3375 |

|                                     |        |        |        |        |
|-------------------------------------|--------|--------|--------|--------|
| 4-y                                 | 6.1221 | 6.2288 | 6.6267 | 6.6074 |
| 5                                   | 4.5356 | 4.7237 | 4.9233 | 5.0410 |
| 5-y                                 | 1.3227 | 1.9139 | 1.5635 | 1.9341 |
| 6                                   | 2.8975 | 2.7969 | 3.0602 | 3.0092 |
| 6-y                                 | 5.9697 | 6.1171 | 6.1324 | 6.4555 |
| <b>structure T9-M5,3"</b>           |        |        |        |        |
| 1                                   | 2.4698 | 2.5209 | 2.7576 | 2.6748 |
| 1-y                                 | 5.1269 | 5.2388 | 5.2994 | 5.5131 |
| 2                                   | 5.3192 | 5.4375 | 5.5646 | 5.7100 |
| 2-y                                 | 1.8629 | 1.9082 | 2.3859 | 1.8860 |
| 3                                   | 7.1788 | 7.3607 | 7.6546 | 7.6692 |
| 3-y                                 | 5.3612 | 5.4347 | 5.9250 | 5.6225 |
| 4                                   | 5.0937 | 5.2021 | 5.5072 | 5.4002 |
| 4-y                                 | 6.3196 | 6.5125 | 6.9136 | 6.9218 |
| 6                                   | 3.1136 | 3.1058 | 3.3618 | 3.3254 |
| 6-y                                 | 5.7239 | 5.8558 | 5.8395 | 6.1828 |
| 5                                   | 4.4438 | 4.6373 | 4.8031 | 4.9631 |
| 5-y                                 | 1.3249 | 1.4202 | 0.9641 | 1.3684 |
| <b>structure T9-ET6,2"</b>          |        |        |        |        |
| 1                                   | 2.8079 | 2.8927 | 3.1296 | 3.0132 |
| 1-y                                 | 6.1128 | 6.2687 | 6.3705 | 6.5726 |
| <b>structure T9-M5,3"-ET6,2"</b>    |        |        |        |        |
| 1                                   | 3.3566 | 3.4011 | 3.5800 | 3.5146 |
| 1-y                                 | 4.3106 | 4.4931 | 4.5778 | 4.7852 |
| <b>structure T9-M5,3"-ET6,4"</b>    |        |        |        |        |
| 3                                   | 7.1058 | 7.3463 | 7.6207 | 7.5844 |
| 3-y                                 | 5.4059 | 5.4964 | 6.0489 | 5.7844 |
| 3-y-in-out                          | 3.3061 | 3.5146 |        | 3.5556 |
| 3-y-in-in                           | 6.3589 | 6.6403 | 6.5753 | 6.1040 |
| <b>structure T9-KT6"-M5,3",3"</b>   |        |        |        |        |
| 1                                   | 2.7076 | 2.8119 | 3.1080 | 3.0593 |
| 1-y                                 | 3.0701 | 3.1012 | 3.4468 | 3.3823 |
| 2                                   | 3.3523 | 3.4330 | 3.2308 | 3.2878 |
| 2-y                                 | 3.4769 | 3.4852 | 3.3569 | 3.4889 |
| 3                                   | 3.7614 | 3.7833 | 3.7621 | 3.8599 |
| 4                                   | 5.4288 | 5.4554 | 5.5297 | 5.5410 |
| 4-y                                 | 5.1992 | 5.2657 | 5.2651 | 5.1252 |
| 3-y                                 | 3.2424 | 3.3196 | 3.2041 | 3.1475 |
| <b>structure T9-KT6"-M3",3"-ET4</b> |        |        |        |        |

|                                        |        |        |        |        |
|----------------------------------------|--------|--------|--------|--------|
| 1                                      | 6.0422 | 6.0787 | 6.1806 | 6.1618 |
| 1-y                                    | 5.7840 | 5.8648 | 5.8699 | 5.7398 |
| <b>structure T9-KT6"-M5,3",3"-ET6</b>  |        |        |        |        |
| 1                                      | 4.0658 | 4.1080 | 3.7776 | 3.8173 |
| 1-y                                    | 4.1021 | 4.1110 | 3.6909 | 3.7205 |
| 40                                     | 7.7307 | 7.8532 | 7.3360 | 7.3157 |
| 40-y                                   | 8.1416 | 8.3018 | 7.8680 | 7.9244 |
| <b>structure T9-KT2,6"-M5,5,3",3"</b>  |        |        |        |        |
| 1                                      | 1.9329 | 1.9093 | 1.7675 | 1.7813 |
| 1-y                                    | 1.8697 | 1.8385 | 1.6849 | 1.5052 |
| <b>structure T10</b>                   |        |        |        |        |
| 1                                      | 2.5022 | 2.5617 | 2.7249 | 2.6407 |
| 1-y                                    | 4.8677 | 4.8102 | 5.1284 | 5.2795 |
| 2-y                                    | 2.3219 | 2.3323 | 2.2276 | 2.1811 |
| 4                                      | 5.1753 | 5.2219 | 5.3229 | 5.2299 |
| 2                                      | 5.8747 | 6.0752 | 5.7702 | 5.8172 |
| 3-y                                    | 5.6260 | 5.6498 | 5.9185 | 5.6470 |
| 3                                      | 7.5176 | 7.6691 | 7.7496 | 7.7314 |
| 4-y                                    | 6.4000 | 6.5064 | 6.5783 | 6.6759 |
| 5-y                                    | 0.8494 | 1.1628 | 1.3628 | 0.9937 |
| 5                                      | 5.2458 | 5.4814 | 4.9730 | 4.9752 |
| 6-y                                    | 5.2978 | 5.3715 | 6.3318 | 7.1612 |
| 6                                      | 2.3196 | 2.2063 | 3.1378 | 3.2693 |
| <b>structure T10-ET6,2"</b>            |        |        |        |        |
| 1                                      | 2.7721 | 2.8127 | 3.3035 | 3.1880 |
| 1-y                                    | 5.9992 | 6.0389 | 6.4585 | 6.6501 |
| <b>structure T10-M5,3"-ET6,2"</b>      |        |        |        |        |
| 1                                      | 2.2411 | 2.2872 | 2.9374 | 2.7917 |
| 1-y                                    | 4.5768 | 4.8348 | 5.5627 | 5.6345 |
| <b>structure T10-M5,3"-ET6,2",6"</b>   |        |        |        |        |
| 1                                      | 3.1573 | 3.1593 | 2.7850 | 2.5970 |
| 1-y                                    | 5.1896 | 5.3569 | 1.3655 | 1.1635 |
| <b>structure T10-KT2,6"-M5,5,3",3"</b> |        |        |        |        |
| 1-y                                    | 1.9571 | 1.8520 | 1.6694 | 1.5179 |
| 1                                      | 1.8588 | 2.0155 | 1.7676 | 1.7818 |
| <b>structure T11-ET6,2"</b>            |        |        |        |        |
| 1                                      | 2.9376 | 3.0799 | 3.3594 | 3.2322 |
| 1-y                                    | 5.9793 | 6.0395 | 6.5217 | 6.6060 |

| <b>structure T11-M5,3"-ET6,2"</b>  |        |        |        |        |
|------------------------------------|--------|--------|--------|--------|
| 1                                  | 3.5136 | 3.5739 | 3.7767 | 3.6428 |
| 1-y                                | 4.3242 | 4.4706 | 4.7303 | 5.1908 |
| 1-y-out-in                         | 4.8213 | 4.8486 | 5.3764 | 5.5930 |
| <b>structure T12-KT2-M5,5,3"</b>   |        |        |        |        |
| 1                                  | 2.7316 | 2.8509 | 3.1443 | 3.0973 |
| 1-y                                | 3.0387 | 3.0615 | 3.4242 | 3.2768 |
| 2                                  | 3.3607 | 3.4464 | 3.2494 | 3.3082 |
| 2-y                                | 3.4399 | 3.4334 | 3.3045 | 3.4369 |
| 3                                  | 3.7264 | 3.7355 | 3.7149 | 3.8148 |
| 4                                  | 5.3864 | 5.3942 | 5.4726 | 5.4809 |
| 4-y                                | 5.1842 | 5.2446 | 5.2450 | 5.1135 |
| 3-y                                | 3.2537 | 3.3319 | 3.1629 | 3.0077 |
| <b>structure T12-KT6"-M5,3",3"</b> |        |        |        |        |
| 1                                  | 2.7483 | 2.8751 | 3.1669 | 3.1185 |
| 1-y                                | 3.1107 | 3.1635 | 3.5078 | 3.4440 |
| 2                                  | 3.3892 | 3.4822 | 3.2991 | 3.3555 |
| 2-y                                | 3.5145 | 3.5348 | 3.4076 | 3.5479 |
| 3                                  | 3.7909 | 3.8200 | 3.8102 | 3.9100 |
| 3-y                                | 3.2271 | 3.3550 | 3.1787 | 3.1521 |
| 4                                  | 5.4341 | 5.4604 | 5.5453 | 5.5561 |
| 4-y                                | 5.2011 | 5.2657 | 5.2736 | 5.1394 |
| <b>structure T13-ET6,2"</b>        |        |        |        |        |
| 1                                  | 2.7021 | 2.7050 | 3.1695 | 3.0706 |
| 1-y                                | 6.1272 | 6.2555 | 6.3914 | 6.6110 |
| <b>structure T13-M5,3"-ET6,2"</b>  |        |        |        |        |
| 1                                  | 2.9010 | 2.9096 | 3.5500 | 3.5107 |
| 1-y                                | 3.9920 | 4.1642 | 4.6798 | 4.9061 |
| <b>structure T14-ET6,2"</b>        |        |        |        |        |
| 1                                  | 2.6585 | 3.0673 | 3.1161 | 2.9667 |
| 1-y                                | 5.9438 | 5.9725 | 6.4840 | 6.8332 |
| <b>structure T14-M5,3"-ET6,2"</b>  |        |        |        |        |
| 1                                  | 2.8734 | 2.8679 | 3.5609 | 3.4544 |
| 1-y                                | 3.8958 | 4.0201 | 4.7634 | 4.9207 |
| 1-y-out-in                         | 4.4714 | 4.4830 | 5.5016 | 5.7417 |

**Table S 17****Dipole moment estimation difference between corresponding conformers with outstretched and half-bowl-shaped geometries, in the calculated trimeric acylphloroglucinols**

The table reports the differences in the HF/6-31G(d,p), HF/6-31+G(d,p), DFT/B3LYP/6-31+G(d,p), and DFT/B3LYP/6-31+G(d,p) with the Grimme' corrections results, respectively denoted as HF, HF+, DFT and DFT-D3 in the column headings. The differences are taken as «dipole moment of the conformer with bowl-shaped geometry minus dipole moment of the conformer with outstretched geometry». To facilitate comparisons of different bowl-shaped geometry-types, the values for conformers with up—down—up orientations of the monomers are highlighted in yellow and the values for conformers with up—up—up orientations of the monomers are highlighted in blue (the values for up—down—down conformers are not highlighted).

| molecule                | conformer | energy difference between half-bowl-shaped and outstretched-shaped conformers (kcal/mol) |        |        |        |
|-------------------------|-----------|------------------------------------------------------------------------------------------|--------|--------|--------|
|                         |           | HF                                                                                       | HF+    | DFT    | DFT-D3 |
| T1                      | 1         | 2.549                                                                                    | 2.504  | 2.366  | 2.605  |
|                         | 2         | -3.665                                                                                   | -3.758 | -3.521 | -4.102 |
|                         | 3         | -1.957                                                                                   | -2.047 | -1.907 | -2.145 |
|                         | 4         | 1.020                                                                                    | 1.022  | 1.220  | 1.296  |
|                         | 5         | -2.643                                                                                   | -2.682 | -3.479 | -3.189 |
|                         | 6         | 3.334                                                                                    | 3.645  | 3.357  | 3.606  |
|                         | 7         | -1.061                                                                                   | -1.137 | -1.365 | -1.512 |
|                         | 8         | -3.620                                                                                   | -3.645 |        |        |
|                         | 9         | 1.533                                                                                    | 1.383  | 1.320  | 1.420  |
|                         | 10        | -1.932                                                                                   | -1.954 | -1.755 | -2.100 |
|                         | 17        | -5.091                                                                                   | -5.034 | -4.085 | -4.983 |
| T2-KT2,6''-M5,5,3'',3'' | 1         | -0.102                                                                                   | -0.095 | -0.127 | -0.157 |
| T3-ET6,2''              | 1         | 3.579                                                                                    | 3.694  | 3.365  | 3.840  |
| T3-M5,3''-ET6,2''       | 1         | 0.911                                                                                    | 1.151  | 0.784  | 1.000  |
| T4-KT2,6''-M5,5,3'',3'' | 1         | -0.086                                                                                   | -0.088 | -0.099 | -0.125 |
| T5-KT6''-M3'',3''-ET4   | 1         | -0.205                                                                                   | -0.143 | -0.252 | -0.347 |
| T5-KT2,6''-M5,5,3'',3'' | 1         | -0.076                                                                                   | -0.085 | -0.100 | -0.207 |
| T6-M5,3''-ET6,4''       | 1         | -1.670                                                                                   | -1.799 | -1.534 | -1.753 |

|                      |   |        |        |        |        |
|----------------------|---|--------|--------|--------|--------|
| T7                   | 1 | 2.265  | 2.144  | 2.649  | 2.901  |
|                      | 2 | -3.505 | -3.707 | -3.197 | -3.505 |
|                      | 3 | -1.978 | -2.078 | -1.885 | -2.129 |
|                      | 4 | 1.059  | 1.071  | 1.190  | 1.277  |
|                      | 5 | -2.879 | -2.911 | -3.566 | -3.124 |
|                      | 6 | 3.157  | 3.407  | 3.166  | 3.545  |
|                      |   |        |        |        |        |
| T7-ET6,2"            | 1 | 3.256  | 3.290  | 3.453  | 3.793  |
|                      |   |        |        |        |        |
| T7-M5,3"-ET6,2"      | 1 | 0.922  | 1.043  | 0.910  | 1.171  |
|                      |   |        |        |        |        |
| T7-KT6"-M5,3",3"     | 1 | 0.190  | 0.052  | 0.170  | 0.228  |
|                      | 2 | -0.068 | -0.186 | -0.111 | -0.098 |
|                      | 3 | -0.360 | -0.230 | -0.361 | -0.553 |
|                      | 4 | -0.097 | -0.017 | -0.127 | -0.225 |
|                      |   |        |        |        |        |
| T7-KT2,6"-M5,5,3",3" | 1 | -0.078 | -0.083 | -0.088 | -0.098 |
|                      |   |        |        |        |        |
| T8-KT6"-M5,3",3"     | 1 | 0.305  | 0.200  | 0.288  | 0.354  |
|                      | 2 | 0.053  | -0.043 | 0.046  | 0.095  |
|                      | 3 | -0.482 | -0.372 | -0.534 | -0.686 |
|                      | 4 | -0.181 | -0.125 | -0.222 | -0.350 |
|                      |   |        |        |        |        |
| T8-KT2-M5,5,3"       | 1 | 0.356  | 0.274  | 0.331  | 0.314  |
|                      | 2 | 0.125  | 0.052  | 0.117  | 0.202  |
|                      | 3 | -0.362 | -0.269 | -0.670 | -0.934 |
|                      | 4 | -0.236 | -0.196 | -0.269 | -0.414 |
|                      |   |        |        |        |        |
| T8-KT2,6"-M5,5,3",3" | 1 | -0.064 | -0.075 | -0.078 | -0.173 |
|                      |   |        |        |        |        |
| T9                   | 1 | 2.524  | 2.509  | 2.450  | 2.698  |
|                      | 2 | -3.596 | -3.663 | -3.451 | -3.397 |
|                      | 3 | -1.889 | -1.985 | -1.873 | -2.134 |
|                      | 4 | 1.058  | 1.086  | 1.236  | 1.334  |
|                      | 5 | -3.213 | -2.810 | -3.360 | -3.107 |
|                      | 6 | 3.072  | 3.320  | 3.072  | 3.446  |
|                      |   |        |        |        |        |
| T9-M5,3"             | 1 | 2.657  | 2.718  | 2.542  | 2.838  |
|                      | 2 | -3.456 | -3.529 | -3.179 | -3.824 |
|                      | 3 | -1.818 | -1.926 | -1.730 | -2.047 |
|                      | 4 | 1.226  | 1.310  | 1.406  | 1.522  |
|                      | 5 | -3.119 | -3.217 | -3.839 | -3.595 |
|                      | 6 | 2.610  | 2.750  | 2.478  | 2.857  |
|                      |   |        |        |        |        |



|                       |   |        |        |        |        |
|-----------------------|---|--------|--------|--------|--------|
| T9-ET6,2"             | 1 | 3.305  | 3.376  | 3.241  | 3.559  |
|                       |   |        |        |        |        |
| T9-M5,3"-ET6,2"       | 1 | 0.954  | 1.092  | 0.998  | 1.271  |
|                       |   |        |        |        |        |
| T9-M5,3"-ET6,4"       | 1 | -1.700 | -1.850 | -1.572 | -1.800 |
|                       |   |        |        |        |        |
| T9-KT6"-M5,3",3"      | 1 | 0.363  | 0.289  | 0.339  | 0.323  |
|                       | 2 | 0.125  | 0.052  | 0.126  | 0.201  |
|                       | 3 | -0.519 | -0.464 | -0.558 | -0.712 |
|                       | 4 | -0.230 | -0.190 | -0.265 | -0.416 |
|                       |   |        |        |        |        |
| T9-KT6"-M3",3"-ET4    | 1 | -0.258 | -0.214 | -0.311 | -0.422 |
|                       |   |        |        |        |        |
| T9-KT6"-M5,3",3"-ET6  | 1 | 0.036  | 0.003  | -0.087 | -0.097 |
|                       |   |        |        |        |        |
| T9-KT2,6"-M5,5,3",3"  | 1 | -0.063 | -0.071 | -0.083 | -0.276 |
|                       |   |        |        |        |        |
| T10                   | 1 | 2.366  | 2.249  | 2.404  | 2.639  |
|                       | 2 | -3.553 | -3.743 | -3.543 | -3.636 |
|                       | 3 | -1.892 | -2.019 | -1.831 | -2.084 |
|                       | 4 | 1.225  | 1.285  | 1.255  | 1.446  |
|                       | 5 | -4.396 | -4.319 | -3.610 | -3.982 |
|                       | 6 | 2.978  | 3.165  | 3.194  | 3.892  |
|                       |   |        |        |        |        |
| T10-ET6,2"            | 1 | 3.227  | 3.226  | 3.155  | 3.462  |
|                       |   |        |        |        |        |
| T10-M5,3"-ET6,2"      | 1 | 2.336  | 2.548  | 2.625  | 2.843  |
|                       |   |        |        |        |        |
| T10-M5,3"-ET6,2",6"   | 1 | 2.032  | 2.198  | -1.420 | -1.434 |
|                       |   |        |        |        |        |
| T10-KT2,6"-M5,5,3",3" | 1 | -0.098 | 0.164  | 0.098  | 0.264  |
|                       |   |        |        |        |        |
| T11-ET6,2"            | 1 | 3.042  | 2.960  | 3.162  | 3.374  |
|                       |   |        |        |        |        |
| T11-M5,3"-ET6,2"      | 1 | 0.811  | 0.897  | 0.954  | 1.548  |
|                       |   |        |        |        |        |
| T12-KT2-M5,5,3"       | 1 | 0.307  | 0.211  | 0.280  | 0.180  |
|                       | 2 | 0.079  | -0.013 | 0.055  | 0.129  |
|                       | 3 | -0.473 | -0.404 | -0.552 | -0.807 |
|                       | 4 | -0.202 | -0.150 | -0.228 | -0.367 |
|                       |   |        |        |        |        |
| T12-KT6"-M5,3",3"     | 1 | 0.362  | 0.288  | 0.341  | 0.326  |
|                       | 2 | 0.125  | 0.053  | 0.109  | 0.192  |
|                       | 3 | -0.564 | -0.465 | -0.632 | -0.758 |

|                  |   |        |        |        |        |
|------------------|---|--------|--------|--------|--------|
|                  | 4 | -0.233 | -0.195 | -0.272 | -0.417 |
|                  |   |        |        |        |        |
| T13-ET6,2"       | 1 | 3.425  | 3.551  | 3.222  | 3.540  |
|                  |   |        |        |        |        |
| T13-M5,3"-ET6,2" | 1 | 1.091  | 1.255  | 1.130  | 1.395  |
|                  |   |        |        |        |        |
| T14-ET6,2"       | 1 | 3.285  | 2.905  | 3.368  | 3.867  |
|                  |   |        |        |        |        |
| T14-M5,3"-ET6,2" | 1 | 1.022  | 1.152  | 1.203  | 1.466  |

**Table S 18****Effect of the inclusion of the Grimme's correction on the estimation of the dipole moment of the conformers of the calculated trimeric acylphloroglucinols**

The table reports the difference in the estimations of the conformers' dipole moments, taken as «dipole moment in the DFT/B3LYP/6-31+G(d,p) result comprising Grimme's correction minus dipole moment in the DFT/B3LYP/6-31+G(d,p) result without Grimme's correction».

Two different tables are presented, respectively grouping the molecules according to their acyl groups or according to their other substituents.

**a) The molecules are grouped according to their acyl groups**

| molecule                | conformer | dipole moment difference (debye) | conformer  | dipole moment difference (debye) |
|-------------------------|-----------|----------------------------------|------------|----------------------------------|
| T1                      | 1         | -0.083                           | 1-y        | 0.155                            |
|                         | 2         | 0.127                            | 2-y        | -0.455                           |
|                         | 3         | -0.018                           | 3-y        | -0.256                           |
|                         | 4         | -0.113                           | 4-y        | -0.037                           |
|                         | 5         | 0.110                            | 5-y        | 0.400                            |
|                         | 6         | -0.055                           | 6-y        | 0.194                            |
|                         | 7         | -0.072                           | 7-y        | -0.220                           |
|                         | 8         |                                  | 8-y        | -0.177                           |
|                         | 9         | -0.078                           | 9-y        | 0.022                            |
|                         | 10        | -0.080                           | 10-y       | -0.425                           |
|                         | 17        | -0.017                           | 17-y       | -0.915                           |
|                         |           |                                  |            |                                  |
| T2-KT2,6''-M5,5,3'',3'' | 1         | 0.031                            | 1-y        | 0.000                            |
|                         |           |                                  |            |                                  |
| T3-ET6,2''              | 1         | -0.097                           | 1-y        | 0.378                            |
|                         |           |                                  |            |                                  |
| T3-M5,3''-ET6,2''       | 1         | -0.033                           | 1-y        | 0.183                            |
|                         |           |                                  |            |                                  |
| T4-KT2,6''-M5,5,3'',3'' | 1         | 0.028                            | 1-y        | 0.002                            |
|                         |           |                                  |            |                                  |
| T5-KT2,6''-M5,5,3'',3'' | 1         | 0.022                            | 1-y        | -0.085                           |
|                         |           |                                  |            |                                  |
| T5-KT6''-M3'',3''-ET4   | 1         | -0.019                           | 1-y        | -0.115                           |
|                         |           |                                  |            |                                  |
| T6-M5,3''-ET6,4''       | 3         | -0.046                           | 3-y        | -0.264                           |
|                         |           |                                  | 3-y-in-out | -0.316                           |
|                         |           |                                  | 3-y-in-in  | -0.486                           |
|                         |           |                                  |            |                                  |
| T7                      | 1         | -0.081                           | 1-y        | 0.171                            |

|                      |   |        |     |        |
|----------------------|---|--------|-----|--------|
|                      | 2 | 0.117  | 2-y | -0.191 |
|                      | 3 | 0.004  | 3-y | -0.240 |
|                      | 4 | -0.111 | 4-y | -0.025 |
|                      | 5 | 0.135  | 5-y | 0.577  |
|                      | 6 | -0.069 | 6-y | 0.310  |
|                      |   |        |     |        |
| T7-ET6,2"            | 1 | -0.111 | 1-y | 0.229  |
|                      |   |        |     |        |
| T7-M5,3"-ET6,2"      | 1 | -0.070 | 1-y | 0.191  |
|                      |   |        |     |        |
| T7-KT6"-M5,3",3"     | 1 | -0.021 | 1-y | 0.036  |
|                      | 2 | 0.062  | 2-y | 0.075  |
|                      | 3 | 0.079  | 3-y | -0.113 |
|                      | 4 | 0.015  | 4-y | -0.084 |
|                      |   |        |     |        |
| T7-KT2,6"-M5,5,3",3" | 1 | 0.022  | 1-y | 0.013  |
|                      |   |        |     |        |
| T8-KT6"-M5,3",3"     | 1 | -0.042 | 1-y | 0.024  |
|                      | 2 | 0.059  | 2-y | 0.108  |
|                      | 3 | 0.094  | 3-y | -0.058 |
|                      | 4 | 0.012  | 4-y | -0.116 |
|                      |   |        |     |        |
| T8-KT2-M5,5,3"       | 1 | -0.051 | 1-y | -0.068 |
|                      | 2 | 0.054  | 2-y | 0.139  |
|                      | 3 | 0.150  | 3-y | -0.114 |
|                      | 4 | 0.003  | 4-y | -0.142 |
|                      |   |        |     |        |
| T8-KT2,6"-M5,5,3",3" | 1 | 0.021  | 1-y | -0.074 |
|                      |   |        |     |        |
| T9                   | 1 | -0.086 | 1-y | 0.162  |
|                      | 2 | 0.120  | 2-y | 0.174  |
|                      | 3 | -0.009 | 3-y | -0.270 |
|                      | 4 | -0.117 | 4-y | -0.019 |
|                      | 5 | 0.118  | 5-y | 0.371  |
|                      | 6 | -0.051 | 6-y | 0.323  |
|                      |   |        |     |        |
| T9-M5,3"             | 1 | -0.083 | 1-y | 0.214  |
|                      | 2 | 0.145  | 2-y | -0.500 |
|                      | 3 | 0.015  | 3-y | -0.303 |
|                      | 4 | -0.107 | 4-y | 0.008  |
|                      | 5 | 0.160  | 5-y | 0.404  |
|                      | 6 | -0.036 | 6-y | 0.343  |
|                      |   |        |     |        |
| T9-ET6,2"            | 1 | -0.116 | 1-y | 0.202  |
|                      |   |        |     |        |

|                       |    |        |            |        |
|-----------------------|----|--------|------------|--------|
| T9-M5,3"-ET6,2"       | 1  | -0.065 | 1-y        | 0.207  |
|                       |    |        |            |        |
| T9-M5,3"-ET6,4"       | 1  | -0.036 | 3-y        | -0.265 |
|                       |    |        | 3-y-in-in  | -0.471 |
|                       |    |        |            |        |
| T9-KT6"-M5,3",3"      | 1  | -0.049 | 1-y        | -0.065 |
|                       | 2  | 0.057  | 2-y        | 0.132  |
|                       | 3  | 0.098  | 3-y        | -0.057 |
|                       | 4  | 0.011  | 4-y        | -0.140 |
|                       |    |        |            |        |
| T9-KT6"-M3",3"-ET4    | 1  | -0.019 | 1-y        | -0.130 |
|                       |    |        |            |        |
| T9-KT6"-M5,3",3"-ET6  | 1  | 0.040  | 1-y        | 0.030  |
|                       | 40 | -0.020 | 40-y       | 0.056  |
|                       |    |        |            |        |
| T9-KT2,6"-M5,5,3",3"  | 1  | 0.014  | 1-y        | -0.180 |
|                       |    |        |            |        |
| T10                   | 1  | -0.084 | 1-y        | 0.151  |
|                       | 2  | 0.047  | 2-y        | -0.047 |
|                       | 3  | -0.018 | 3-y        | -0.272 |
|                       | 4  | -0.093 | 4-y        | 0.098  |
|                       | 5  | 0.002  | 5-y        | -0.369 |
|                       | 6  | 0.132  | 6-y        | 0.829  |
|                       |    |        |            |        |
| T10-ET6,2"            | 1  | -0.116 | 1-y        | 0.192  |
|                       |    |        |            |        |
| T10-M5,3"-ET6,2"      | 1  | -0.146 | 1-y        | 0.072  |
|                       |    |        |            |        |
| T10-M5,3"-ET6,2",6"   | 1  | -0.188 | 1-y        | -0.202 |
|                       |    |        |            |        |
| T10-KT2,6"-M5,5,3",3" | 1  | 0.014  | 1-y        | -0.152 |
|                       |    |        |            |        |
| T11-ET6,2"            | 1  | -0.127 | 1-y        | 0.084  |
|                       |    |        |            |        |
| T11-M5,3"-ET6,2"      | 1  | -0.134 | 1-y        | 0.461  |
|                       |    |        | 1-y-out-in | 0.217  |
|                       |    |        |            |        |
| T12-KT2-M5,5,3"       | 1  | -0.047 | 1-y        | -0.147 |
|                       | 2  | 0.059  | 2-y        | 0.132  |
|                       | 3  | 0.100  | 3-y        | -0.155 |
|                       | 4  | 0.008  | 4-y        | -0.132 |
|                       |    |        |            |        |
| T12-KT6"-M5,3",3"     | 1  | -0.048 | 1-y        | -0.064 |
|                       | 2  | 0.056  | 2-y        | 0.140  |

|                    |   |        |            |        |
|--------------------|---|--------|------------|--------|
|                    | 3 | 0.100  | 3-y        | -0.027 |
|                    | 4 | 0.011  | 4-y        | -0.134 |
|                    |   |        |            |        |
| T13-ET6,2''        | 1 | -0.099 | 1-y        | 0.220  |
|                    |   |        |            |        |
| T13-M5,3''-ET6,2'' | 1 | -0.039 | 1-y        | 0.226  |
|                    |   |        |            |        |
| T14-ET6,2''        | 1 | -0.149 | 1-y        | 0.349  |
|                    |   |        |            |        |
| T14-M5,3''-ET6,2'' | 1 | -0.107 | 1-y        | 0.157  |
|                    |   |        | 1-y-out-in | 0.240  |

**b) The molecules are grouped according to their other substituents**

| molecule | conformer | dipole moment difference (debye) | conformer | dipole moment difference (debye) |
|----------|-----------|----------------------------------|-----------|----------------------------------|
| T1       | 1         | -0.083                           | 1-y       | 0.155                            |
|          | 2         | 0.127                            | 2-y       | -0.455                           |
|          | 3         | -0.018                           | 3-y       | -0.256                           |
|          | 4         | -0.113                           | 4-y       | -0.037                           |
|          | 5         | 0.110                            | 5-y       | 0.400                            |
|          | 6         | -0.055                           | 6-y       | 0.194                            |
|          | 7         | -0.072                           | 7-y       | -0.220                           |
|          | 8         | 0.000                            | 8-y       | -0.177                           |
|          | 9         | -0.078                           | 9-y       | 0.022                            |
|          | 10        | -0.080                           | 10-y      | -0.425                           |
|          | 17        | -0.017                           | 17-y      | -0.915                           |
|          |           |                                  |           |                                  |
| T7       | 1         | -0.081                           | 1-y       | 0.171                            |
|          | 2         | 0.117                            | 2-y       | -0.191                           |
|          | 3         | 0.004                            | 3-y       | -0.240                           |

|            |            |            |            |            |
|------------|------------|------------|------------|------------|
|            | 4          | -0.111     | 4-y        | -0.025     |
|            | 5          | 0.135      | 5-y        | 0.577      |
|            | 6          | -0.069     | 6-y        | 0.310      |
|            |            |            |            |            |
| T9         | 1          | -0.086     | 1-y        | 0.162      |
|            | 2          | 0.120      | 2-y        | 0.174      |
|            | 3          | -0.009     | 3-y        | -0.270     |
|            | 4          | -0.117     | 4-y        | -0.019     |
|            | 5          | 0.118      | 5-y        | 0.371      |
|            | 6          | -0.051     | 6-y        | 0.323      |
|            |            |            |            |            |
| T10        | 1          | -0.084     | 1-y        | 0.151      |
|            | 2          | 0.047      | 2-y        | -0.047     |
|            | 3          | -0.018     | 3-y        | -0.272     |
|            | 4          | -0.093     | 4-y        | 0.098      |
|            | 5          | 0.002      | 5-y        | -0.369     |
|            | 6          | 0.132      | 6-y        | 0.829      |
|            |            |            |            |            |
| ////////// | ////////// | ////////// | ////////// | ////////// |
|            |            |            |            |            |
| T9-M5,3"   | 1          | -0.083     | 1-y        | 0.214      |
|            | 2          | 0.145      | 2-y        | -0.500     |
|            | 3          | 0.015      | 3-y        | -0.303     |
|            | 4          | -0.107     | 4-y        | 0.008      |
|            | 5          | 0.160      | 5-y        | 0.404      |
|            | 6          | -0.036     | 6-y        | 0.343      |
|            |            |            |            |            |
| ////////// | ////////// | ////////// | ////////// | ////////// |
|            |            |            |            |            |
| T3-ET6,2"  | 1          | -0.097     | 1-y        | 0.378      |
|            |            |            |            |            |
| T7-ET6,2"  | 1          | -0.111     | 1-y        | 0.229      |
|            |            |            |            |            |
| T9-ET6,2"  | 1          | -0.116     | 1-y        | 0.202      |
|            |            |            |            |            |
| T10-ET6,2" | 1          | -0.116     | 1-y        | 0.192      |
|            |            |            |            |            |
| T11-ET6,2" | 1          | -0.127     | 1-y        | 0.084      |
|            |            |            |            |            |
| T13-ET6,2" | 1          | -0.099     | 1-y        | 0.220      |
|            |            |            |            |            |
| T14-ET6,2" | 1          | -0.149     | 1-y        | 0.349      |
|            |            |            |            |            |
| ////////// | ////////// | ////////// | ////////// | ////////// |

|                      |                      |                      |                      |                      |
|----------------------|----------------------|----------------------|----------------------|----------------------|
|                      |                      |                      |                      |                      |
| T3-M5,3"-ET6,2"      | 1                    | -0.033               | 1-y                  | 0.183                |
|                      |                      |                      |                      |                      |
| T7-M5,3"-ET6,2"      | 1                    | -0.070               | 1-y                  | 0.191                |
|                      |                      |                      |                      |                      |
| T9-M5,3"-ET6,2"      | 1                    | -0.065               | 1-y                  | 0.207                |
|                      |                      |                      |                      |                      |
| T10-M5,3"-ET6,2"     | 1                    | -0.146               | 1-y                  | 0.072                |
|                      |                      |                      |                      |                      |
| T11-M5,3"-ET6,2"     | 1                    | -0.134               | 1-y                  | 0.461                |
|                      |                      |                      | 1-y-out-in           | 0.217                |
|                      |                      |                      |                      |                      |
| T13-M5,3"-ET6,2"     | 1                    | -0.039               | 1-y                  | 0.226                |
|                      |                      |                      |                      |                      |
| T14-M5,3"-ET6,2"     | 1                    | -0.107               | 1-y                  | 0.157                |
|                      |                      |                      | 1-y-out-in           | 0.240                |
|                      |                      |                      |                      |                      |
| T10-M5,3"-ET6,2",6"  | 1                    | -0.188               | 1-y                  | -0.202               |
|                      |                      |                      |                      |                      |
| //////////////////// | //////////////////// | //////////////////// | //////////////////// | //////////////////// |
|                      |                      |                      |                      |                      |
| T7-KT6"-M5,3",3"     | 1                    | -0.021               | 1-y                  | 0.036                |
|                      | 2                    | 0.062                | 2-y                  | 0.075                |
|                      | 3                    | 0.079                | 3-y                  | -0.113               |
|                      | 4                    | 0.015                | 4-y                  | -0.084               |
|                      |                      |                      |                      |                      |
| T8-KT6"-M5,3",3"     | 1                    | -0.042               | 1-y                  | 0.024                |
|                      | 2                    | 0.059                | 2-y                  | 0.108                |
|                      | 3                    | 0.094                | 3-y                  | -0.058               |
|                      | 4                    | 0.012                | 4-y                  | -0.116               |
|                      |                      |                      |                      |                      |
| T9-KT6"-M5,3",3"     | 1                    | -0.049               | 1-y                  | -0.065               |
|                      | 2                    | 0.057                | 2-y                  | 0.132                |
|                      | 3                    | 0.098                | 3-y                  | -0.057               |
|                      | 4                    | 0.011                | 4-y                  | -0.140               |
|                      |                      |                      |                      |                      |
| T12-KT6"-M5,3",3"    | 1                    | -0.048               | 1-y                  | -0.064               |
|                      | 2                    | 0.056                | 2-y                  | 0.140                |
|                      | 3                    | 0.100                | 3-y                  | -0.027               |
|                      | 4                    | 0.011                | 4-y                  | -0.134               |
|                      |                      |                      |                      |                      |
| T8-KT2-M5,5,3"       | 1                    | -0.051               | 1-y                  | -0.068               |
|                      | 2                    | 0.054                | 2-y                  | 0.139                |
|                      | 3                    | 0.150                | 3-y                  | -0.114               |
|                      | 4                    | 0.003                | 4-y                  | -0.142               |



|                       |            |            |            |            |
|-----------------------|------------|------------|------------|------------|
|                       |            |            |            |            |
| T12-KT2-M5,5,3"       | 1          | -0.047     | 1-y        | -0.147     |
|                       | 2          | 0.059      | 2-y        | 0.132      |
|                       | 3          | 0.100      | 3-y        | -0.155     |
|                       | 4          | 0.008      | 4-y        | -0.132     |
|                       |            |            |            |            |
| //////////            | ////////// | ////////// | ////////// | ////////// |
|                       |            |            |            |            |
| T2-KT2,6"-M5,5,3",3"  | 1          | 0.031      | 1-y        | 0.000      |
|                       |            |            |            |            |
| T4-KT2,6"-M5,5,3",3"  | 1          | 0.028      | 1-y        | 0.002      |
|                       |            |            |            |            |
| T5-KT2,6"-M5,5,3",3"  | 1          | 0.022      | 1-y        | -0.085     |
|                       |            |            |            |            |
| T7-KT2,6"-M5,5,3",3"  | 1          | 0.022      | 1-y        | 0.013      |
|                       |            |            |            |            |
| T8-KT2,6"-M5,5,3",3"  | 1          | 0.021      | 1-y        | -0.074     |
|                       |            |            |            |            |
| T9-KT2,6"-M5,5,3",3"  | 1          | 0.014      | 1-y        | -0.180     |
|                       |            |            |            |            |
| T10-KT2,6"-M5,5,3",3" | 1          | 0.014      | 1-y        | -0.152     |
|                       |            |            |            |            |
| //////////            | ////////// | ////////// | ////////// | ////////// |
|                       |            |            |            |            |
| T6-M5,3"-ET6,4"       | 3          | -0.046     | 3-y        | -0.264     |
|                       |            |            | 3-y-in-out | -0.316     |
|                       |            |            | 3-y-in-in  | -0.486     |
|                       |            |            |            |            |
| T9-M5,3"-ET6,4"       | 1          | -0.036     | 3-y        | -0.265     |
|                       |            |            | 3-y-in-in  | -0.471     |
|                       |            |            |            |            |
| T5-KT6"-M3",3"-ET4    | 1          | -0.019     | 1-y        | -0.115     |
|                       |            |            |            |            |
| T9-KT6"-M3",3"-ET4    | 1          | -0.019     | 1-y        | -0.130     |
|                       |            |            |            |            |
| T9-KT6"-M5,3",3"-ET6  | 1          | 0.040      | 1-y        | 0.030      |
|                       | 40         | -0.020     | 40-y       | 0.056      |
|                       |            |            |            |            |

**Table S 19****Information from the obtained MP2 results for trimeric acylphloroglucinols**

MP2 denotes the MP2/6-31G(d,p) results in the column headings, and MP2+ denotes the MP2/6-31+G(d,p) results.

**a) Relative energies**

| Molecule                | Conformer | Relative energy (kcal/mol) |                  |
|-------------------------|-----------|----------------------------|------------------|
|                         |           | MP2                        | MP2+             |
| T1                      | 1-y       | 0.000                      | — <sup>a</sup> — |
|                         | 1         | 0.234                      |                  |
|                         | 2-y       | 1.661                      |                  |
|                         | 2         | 3.215                      |                  |
|                         | 3-y       | 3.084                      |                  |
|                         | 3         | 3.558                      |                  |
|                         | 4-y       | 3.862                      |                  |
|                         | 4         | 4.154                      |                  |
| T2-KT2,6''-M5,5,3'',3'' | 1-y       | 0.000                      | 0.000            |
|                         | 1         | 0.870                      | 1.855            |
| T7-KT6''-M5,3'',3''     | 1-y       | 0.000                      |                  |
|                         | 1         | 0.966                      |                  |

<sup>a</sup> It would not be realistic to use the available data to calculate the MP2+ relative energies for T1, because the expected lowest energy conformer (3-y) did not converge.

**b) Energy difference between the MP2 energy value and the HF energy value reported in the same output**

| Molecule | Conformer | Energy difference (kcal/mol) |          |
|----------|-----------|------------------------------|----------|
|          |           | MP2                          | MP2+     |
| T1       | 1-y       | 3531.714                     | 3591.292 |
|          | 1         | 3530.424                     | 3585.707 |
|          | 2         | 3535.242                     |          |
|          | 2-y       | 3529.600                     | 3583.559 |
|          | 3         | 3530.507                     |          |
|          | 3-y       | 3529.176                     |          |
|          | 4         | 3532.956                     | 3587.038 |
|          | 4-y       | 3531.525                     | 3584.217 |

|                         |     |          |          |
|-------------------------|-----|----------|----------|
|                         |     |          |          |
| T2-KT2,6''-M5,5,3'',3'' | 1-y | 4087.584 | 4152.266 |
|                         | 1   | 4083.626 | 4141.335 |
|                         |     |          |          |
| T3-M5,3''-ET6,2''       | 1-y | 4183.543 |          |
|                         |     |          |          |
| T7-KT6''-M5,3'',3''     | 1-y | 4180.956 |          |
|                         | 1   | 4175.585 |          |

c) **Hydrogen bond lengths**

| Molecule | Conformer | H-bond         | H-bond length (Å) |       |
|----------|-----------|----------------|-------------------|-------|
|          |           |                | MP2               | MP2+  |
|          |           |                |                   |       |
| T1       | 1-y       | H15....O14     | 1.531             |       |
|          |           | H17'....O14'   | 1.533             |       |
|          |           | H17''....O14'' | 1.543             |       |
|          |           | H16'....O8     | 1.691             |       |
|          |           | H16....O12'    | 1.746             |       |
|          |           | H16''....O10'  | 1.749             |       |
|          |           | H15'....O12''  | 1.739             |       |
|          | 1         | H15....O14     | 1.532             | 1.528 |
|          |           | H17'....O14'   | 1.532             | 1.533 |
|          |           | H17''....O14'' | 1.541             | 1.538 |
|          |           | H16'....O8     | 1.691             | 1.678 |
|          |           | H16....O12'    | 1.746             | 1.738 |
|          |           | H16''....O10'  | 1.749             | 1.742 |
|          |           | H15'....O12''  | 1.739             | 1.727 |
|          | 2-y       | H15....O14     | 1.525             | 1.532 |
|          |           | H17'....O14'   | 1.540             | 1.545 |
|          |           | H15''....O14'' | 1.561             | 1.648 |
|          |           | H16'....O8     | 1.667             | 1.701 |
|          |           | H16....O12'    | 1.759             | 1.782 |
|          |           | H17''....O10'  | 1.723             | 1.735 |
|          |           | H15'....O10''  | 1.822             | 1.837 |

|                         |     |                |       |       |
|-------------------------|-----|----------------|-------|-------|
|                         | 2   | H15....O14     | 1.530 |       |
|                         |     | H17'....O14'   | 1.536 |       |
|                         |     | H15''....O14'' | 1.608 |       |
|                         |     | H16'....O8     | 1.683 |       |
|                         |     | H16....O12'    | 1.750 |       |
|                         |     | H17''....O10'  | 1.747 |       |
|                         |     | H15'....O10''  | 1.793 |       |
|                         | 3-y | H15....O14     | 1.540 |       |
|                         |     | H15'....O14'   | 1.531 |       |
|                         |     | H15''....O14'' | 1.607 |       |
|                         |     | H17'....O8     | 1.733 |       |
|                         |     | H16....O10'    | 1.748 |       |
|                         |     | H17''....O8'   | 1.733 |       |
|                         |     | H16'....O10''  | 1.739 |       |
|                         | 3   | H15....O14     | 1.540 |       |
|                         |     | H15'....O14'   | 1.532 |       |
|                         |     | H15''....O14'' | 1.607 |       |
|                         |     | H17'....O8     | 1.731 |       |
|                         |     | H16....O10'    | 1.755 |       |
|                         |     | H17''....O8'   | 1.740 |       |
|                         |     | H16'....O10''  | 1.747 |       |
|                         | 4-y | H15....O14     | 1.555 | 1.570 |
|                         |     | H17'....O14'   | 1.534 | 1.536 |
|                         |     | H17''....O14'' | 1.543 | 1.542 |
|                         |     | H10'....O8     | 1.700 | 1.705 |
|                         |     | H16....O12'    | 1.752 | 1.770 |
|                         |     | H16''....O10'  | 1.751 | 1.742 |
|                         |     | H15'....O12''  | 1.741 | 1.739 |
|                         | 4   | H15....O14     | 1.555 | 1.561 |
|                         |     | H17'....O14'   | 1.533 | 1.536 |
|                         |     | H17''....O14'' | 1.542 | 1.540 |
|                         |     | H10'....O8     | 1.697 | 1.694 |
|                         |     | H16....O12'    | 1.745 | 1.748 |
|                         |     | H16''....O10'  | 1.751 | 1.751 |
|                         |     | H15'....O12''  | 1.736 | 1.737 |
|                         |     |                |       |       |
| T2-KT2,6''-M5,5,3'',3'' | 1-y | H17....O14     | 1.522 | 1.512 |
|                         |     | H15'....O14'   | 1.515 | 1.534 |
|                         |     | H15''....O14'' | 1.525 | 1.517 |
|                         |     | H17'....O8     | 1.596 | 1.641 |
|                         |     | H16....O10'    | 1.718 | 1.730 |
|                         |     | H16''....O8'   | 1.684 | 1.675 |

|                  |     |              |       |       |
|------------------|-----|--------------|-------|-------|
|                  | 1   | H16'....O12" | 1.667 | 1.669 |
|                  |     | H17....O14   | 1.514 | 1.514 |
|                  |     | H15'....O14' | 1.522 | 1.522 |
|                  |     | H15"....O14" | 1.514 | 1.513 |
|                  |     | H17'....O8   | 1.595 | 1.587 |
|                  |     | H16....O10'  | 1.697 | 1.692 |
|                  |     | H16"....O8'  | 1.691 | 1.687 |
|                  |     | H16'....O12" | 1.652 | 1.652 |
|                  |     |              |       |       |
| T3-M5,3"-ET6,2"  | 1-y | H15....O14   | 1.553 |       |
|                  |     | H15'....O14' | 1.514 |       |
|                  |     | H17"....O14" | 1.544 |       |
|                  |     | H17'....O8   | 1.725 |       |
|                  |     | H16....O10'  | 1.737 |       |
|                  |     | H16"....O8'  | 1.740 |       |
|                  |     | H16'....O12" | 1.629 |       |
|                  |     |              |       |       |
| T7-KT6"-M5,3",3" | 1-y | H15....O14   | 1.523 |       |
|                  |     | H15'....O14' | 1.534 |       |
|                  |     | H15"....O14" | 1.513 |       |
|                  |     | H17'....O8   | 1.640 |       |
|                  |     | H16....O10'  | 1.730 |       |
|                  |     | H16"....O8'  | 1.691 |       |
|                  |     | H16'....O12" | 1.666 |       |
|                  | 1   | H15....O14   | 1.526 |       |
|                  |     | H15'....O14' | 1.530 |       |
|                  |     | H15"....O14" | 1.514 |       |
|                  |     | H17'....O8   | 1.664 |       |
|                  |     | H16....O10'  | 1.725 |       |
|                  |     | H16"....O8'  | 1.704 |       |
|                  |     | H16'....O12" | 1.656 |       |

d) **Comparison of the estimation of the hydrogen bond lengths with the results of the other methods**

| Conf-<br>ormer | H-bond         | H-bond length (Å) |       |       |        |       |
|----------------|----------------|-------------------|-------|-------|--------|-------|
|                |                | HF                | HF+   | DFT   | DFT-D3 | MP2   |
| <b>T1</b>      |                |                   |       |       |        |       |
| 1              | H15....O14     | 1.626             | 1.631 | 1.473 | 1.480  | 1.532 |
|                | H17'....O14'   | 1.622             | 1.627 | 1.474 | 1.483  | 1.532 |
|                | H17''....O14'' | 1.632             | 1.637 | 1.483 | 1.491  | 1.541 |
|                | H16'....O8     | 1.815             | 1.822 | 1.709 | 1.689  | 1.691 |
|                | H16....O12'    | 1.851             | 1.855 | 1.758 | 1.741  | 1.746 |
|                | H16''....O10'  | 1.857             | 1.866 | 1.771 | 1.750  | 1.749 |
|                | H15'....O12''  | 1.847             | 1.854 | 1.749 | 1.732  | 1.739 |
| 1-y            | H15....O14     | 1.630             | 1.634 | 1.476 | 1.483  | 1.531 |
|                | H17'....O14'   | 1.624             | 1.629 | 1.474 | 1.483  | 1.533 |
|                | H17''....O14'' | 1.632             | 1.637 | 1.484 | 1.494  | 1.543 |
|                | H16'....O8     | 1.837             | 1.846 | 1.726 | 1.702  | 1.691 |
|                | H16....O12'    | 1.863             | 1.868 | 1.761 | 1.746  | 1.746 |
|                | H16''....O10'  | 1.847             | 1.879 | 1.781 | 1.760  | 1.749 |
|                | H15'....O12''  | 1.870             | 1.855 | 1.750 | 1.735  | 1.739 |
| 2              | H15....O14     | 1.624             | 1.629 | 1.469 | 1.477  | 1.530 |
|                | H17'....O14'   | 1.625             | 1.629 | 1.478 | 1.487  | 1.536 |
|                | H15''....O14'' | 1.691             | 1.696 | 1.557 | 1.568  | 1.608 |
|                | H16'....O8     | 1.857             | 1.818 | 1.701 | 1.682  | 1.683 |
|                | H16....O12'    | 1.811             | 1.861 | 1.766 | 1.749  | 1.750 |
|                | H17''....O10'  | 1.885             | 1.858 | 1.758 | 1.737  | 1.747 |
|                | H15'....O10''  | 1.849             | 1.897 | 1.801 | 1.788  | 1.793 |
| 2-y            | H15....O14     | 1.626             | 1.631 | 1.471 | 1.474  | 1.525 |
|                | H17'....O14'   | 1.627             | 1.632 | 1.478 | 1.490  | 1.540 |
|                | H15''....O14'' | 1.691             | 1.697 | 1.557 | 1.573  | 1.561 |
|                | H16'....O8     | 1.828             | 1.837 | 1.714 | 1.675  | 1.667 |
|                | H16....O12'    | 1.867             | 1.872 | 1.770 | 1.761  | 1.759 |
|                | H17''....O10'  | 1.860             | 1.871 | 1.767 | 1.727  | 1.723 |
|                | H15'....O10''  | 1.889             | 1.903 | 1.805 | 1.810  | 1.822 |
| 3              | H15....O14     | 1.631             | 1.636 | 1.481 | 1.490  | 1.540 |
|                | H15'....O14'   | 1.621             | 1.627 | 1.470 | 1.480  | 1.532 |
|                | H15''....O14'' | 1.690             | 1.696 | 1.556 | 1.567  | 1.607 |
|                | H17'....O8     | 1.846             | 1.853 | 1.746 | 1.730  | 1.731 |
|                | H16....O10'    | 1.861             | 1.870 | 1.780 | 1.760  | 1.755 |
|                | H17''....O8'   | 1.836             | 1.843 | 1.742 | 1.726  | 1.740 |

|                             |              |       |       |       |       |       |
|-----------------------------|--------------|-------|-------|-------|-------|-------|
|                             | H16'....O10" | 1.852 | 1.865 | 1.769 | 1.753 | 1.747 |
| 3-y                         | H15....O14   | 1.631 | 1.636 | 1.481 | 1.490 | 1.540 |
|                             | H15'....O14' | 1.632 | 1.629 | 1.471 | 1.481 | 1.531 |
|                             | H15"....O14" | 1.690 | 1.696 | 1.556 | 1.567 | 1.607 |
|                             | H17'....O8   | 1.844 | 1.851 | 1.747 | 1.732 | 1.733 |
|                             | H16....O10'  | 1.865 | 1.874 | 1.782 | 1.762 | 1.748 |
|                             | H17"....O8'  | 1.849 | 1.855 | 1.747 | 1.731 | 1.733 |
|                             | H16'....O10" | 1.870 | 1.884 | 1.780 | 1.760 | 1.739 |
| 4                           | H15....O14   | 1.650 | 1.656 | 1.492 | 1.502 | 1.555 |
|                             | H17'....O14' | 1.623 | 1.628 | 1.475 | 1.483 | 1.533 |
|                             | H17"....O14" | 1.632 | 1.637 | 1.483 | 1.492 | 1.542 |
|                             | H10'....O8   | 1.819 | 1.828 | 1.716 | 1.697 | 1.697 |
|                             | H16....O12'  | 1.852 | 1.858 | 1.759 | 1.742 | 1.745 |
|                             | H16"....O10' | 1.858 | 1.867 | 1.771 | 1.751 | 1.751 |
|                             | H15'....O12" | 1.848 | 1.855 | 1.750 | 1.733 | 1.736 |
| 4-y                         | H15....O14   | 1.650 | 1.661 | 1.496 | 1.505 | 1.555 |
|                             | H17'....O14' | 1.625 | 1.631 | 1.475 | 1.484 | 1.534 |
|                             | H17"....O14" | 1.633 | 1.638 | 1.484 | 1.494 | 1.543 |
|                             | H10'....O8   | 1.842 | 1.852 | 1.733 | 1.709 | 1.700 |
|                             | H16....O12'  | 1.867 | 1.873 | 1.764 | 1.749 | 1.752 |
|                             | H16"....O10' | 1.871 | 1.880 | 1.781 | 1.762 | 1.751 |
|                             | H15'....O12" | 1.850 | 1.858 | 1.751 | 1.737 | 1.741 |
| <b>T2-KT2,6"-M5,5,3",3"</b> |              |       |       |       |       |       |
| 1                           | H17....O14   | 1.637 | 1.643 | 1.451 | 1.469 | 1.514 |
|                             | H15'....O14' | 1.610 | 1.612 | 1.460 | 1.468 | 1.522 |
|                             | H15"....O14" | 1.637 | 1.643 | 1.451 | 1.469 | 1.514 |
|                             | H17'....O8   | 1.745 | 1.749 | 1.640 | 1.625 | 1.595 |
|                             | H16....O10'  | 1.831 | 1.836 | 1.720 | 1.696 | 1.697 |
|                             | H16"....O8'  | 1.841 | 1.845 | 1.718 | 1.697 | 1.691 |
|                             | H16'....O12" | 1.709 | 1.711 | 1.580 | 1.562 | 1.652 |
| 1-y                         | H17....O14   | 1.637 | 1.643 | 1.451 | 1.469 | 1.522 |
|                             | H15'....O14' | 1.612 | 1.613 | 1.460 | 1.468 | 1.515 |
|                             | H15"....O14" | 1.638 | 1.644 | 1.452 | 1.471 | 1.525 |
|                             | H17'....O8   | 1.747 | 1.748 | 1.640 | 1.627 | 1.596 |
|                             | H16....O10'  | 1.853 | 1.858 | 1.731 | 1.698 | 1.718 |
|                             | H16"....O8'  | 1.844 | 1.848 | 1.722 | 1.704 | 1.684 |
|                             | H16'....O12" | 1.723 | 1.727 | 1.595 | 1.566 | 1.667 |
| <b>T3-M5,3"-ET6,2"</b>      |              |       |       |       |       |       |
| 1-y                         | H15....O14   | 1.660 | 1.669 | 1.488 | 1.501 | 1.553 |
|                             | H15'....O14' | 1.636 | 1.646 | 1.450 | 1.462 | 1.514 |
|                             | H17"....O14" | 1.657 | 1.667 | 1.481 | 1.492 | 1.544 |

|                         |              |       |       |       |       |       |
|-------------------------|--------------|-------|-------|-------|-------|-------|
|                         | H17'....O8   | 1.837 | 1.849 | 1.733 | 1.719 | 1.725 |
|                         | H16....O10'  | 1.865 | 1.876 | 1.770 | 1.750 | 1.737 |
|                         | H16"....O8'  | 1.857 | 1.865 | 1.749 | 1.736 | 1.740 |
|                         | H16'....O12" | 1.821 | 1.831 | 1.708 | 1.686 | 1.629 |
| <b>T7-KT6"-M5,3",3"</b> |              |       |       |       |       |       |
| 1                       | H15....O14   | 1.624 | 1.628 | 1.481 | 1.489 | 1.526 |
|                         | H15'....O14' | 1.610 | 1.612 | 1.460 | 1.468 | 1.530 |
|                         | H15"....O14" | 1.637 | 1.642 | 1.451 | 1.469 | 1.514 |
|                         | H17'....O8   | 1.827 | 1.836 | 1.734 | 1.715 | 1.664 |
|                         | H16....O10'  | 1.829 | 1.840 | 1.742 | 1.720 | 1.725 |
|                         | H16"....O8'  | 1.844 | 1.848 | 1.720 | 1.699 | 1.704 |
|                         | H16'....O12" | 1.713 | 1.717 | 1.587 | 1.571 | 1.656 |
| 1-y                     | H15....O14   | 1.626 | 1.629 | 1.483 | 1.490 | 1.523 |
|                         | H15'....O14' | 1.611 | 1.613 | 1.460 | 1.468 | 1.534 |
|                         | H15"....O14" | 1.638 | 1.643 | 1.451 | 1.470 | 1.513 |
|                         | H17'....O8   | 1.834 | 1.840 | 1.736 | 1.721 | 1.640 |
|                         | H16....O10'  | 1.851 | 1.860 | 1.755 | 1.730 | 1.730 |
|                         | H16"....O8'  | 1.844 | 1.849 | 1.723 | 1.706 | 1.691 |
|                         | H16'....O12" | 1.723 | 1.730 | 1.599 | 1.573 | 1.666 |
